# Supplementary material for: Atom-economic synthesis of β-ketosulfones based on gold-catalyzed highly regioselective hydration of alkynylsulfones
Source: Royal Society of Chemistry journal article supplement (doi:10.1039/d2gc00541g), 2022-01-01
Supplement: d2gc00541g1.pdf [file d2gc00541g1.pdf]

*Supporting Information for*

## **Atom-economic Synthesis of $\beta$ -Ketosulfones Based on Gold-catalyzed Highly Regioselective Hydration of Alkynylsulfones**

Elena I. Chikunova,<sup>a</sup> Vadim Yu. Kukushkin<sup>a,b</sup> and Alexey Yu. Dubovtsev<sup>\*a</sup>

<sup>a</sup>Saint Petersburg State University, Universitetskaya Nab. 7/9 199034 Saint Petersburg, Russian Federation

<sup>b</sup>Laboratory of Crystal Engineering of Functional Materials, South Ural State University, 76, Lenin Av., 454080 Chelyabinsk, Russian Federation

E-mail: [a.dubovtsev@spbu.ru](mailto:a.dubovtsev@spbu.ru)

### **Table of Contents**

|      |                                                                                                           |    |
|------|-----------------------------------------------------------------------------------------------------------|----|
| 1    | General Remarks .....                                                                                     | 2  |
| 2    | Preparation of the Starting Materials .....                                                               | 3  |
| 2.1. | General Procedure for the Synthesis of Starting Alkynylsulfones <b>1</b> from Arylsulfonyl Chlorides..... | 3  |
| 2.2. | General Procedure for the Synthesis of Starting Alkynylsulfones <b>1</b> from Alkenyldibromides .....     | 4  |
| 2.3. | General Procedure for the Synthesis of Starting Alkynylsulfones <b>1</b> from Terminal Alkynes .....      | 7  |
| 2.4. | General Procedure for the Synthesis of Starting Alkynylsulfones <b>1</b> from Alkynyl Bromides.....       | 8  |
| 3    | Complete Optimization Studies .....                                                                       | 12 |
| 4    | Experimental Procedures and Characterization Data.....                                                    | 14 |
| 4.1. | General Procedure for the Gold(I)-Catalyzed Hydration of Alkynylsulfones.....                             | 14 |
| 4.2. | One-pot Synthesis of Quinoline <b>4</b> .....                                                             | 22 |
| 4.3. | One-pot Synthesis of Benzimidazole <b>6</b> .....                                                         | 23 |
| 4.4. | One-pot Synthesis of Triazole <b>8</b> .....                                                              | 23 |
| 4.5. | One-pot Propargylation of <b>2a</b> . Synthesis of Furane <b>11</b> and Diketone <b>12</b> .....          | 24 |
| 5    | References.....                                                                                           | 26 |
| 6    | NMR Spectra.....                                                                                          | 28 |
| 7    | XRD Single Crystal Structures of <b>2q</b> .....                                                          | 89 |
| 8    | Calculations of Atom-economy .....                                                                        | 91 |

## 1 General Remarks

NMR spectra were recorded at ambient temperature with a Bruker Avance III 400 instrument at 400.13 MHz ( $^1\text{H}$  NMR) and 100.61 MHz ( $^{13}\text{C}$  NMR) in  $\text{CDCl}_3$ . Chemical shifts ( $\delta$ ) are given in ppm relative to resonances of the solvents ( $^1\text{H}$ :  $\delta = 7.26$  for residual  $\text{CHCl}_3$  peak,  $\delta = 2.50$  for residual DMSO peak;  $^{13}\text{C}$ :  $\delta = 77.2$  for  $\text{CDCl}_3$ ,  $\delta = 39.5$  for  $\text{DMSO-}d_6$ ). Mass-spectra were recorded on Bruker MicroTOF (ESI) and Bruker maXis HRMS-ESI-QTOF instruments. Chromatographic separation was carried out on Macherey–Nagel silica gel 60 M (0.04–0.063 mm). Analytical TLC was performed on unmodified Merck ready-to-use plates (TLC silica gel 60 F254); detection was achieved with a UV lamp. Melting points were measured with Stuart smp30 apparatus. Gold complexes were synthesized accordingly to our previously published protocols.<sup>1</sup> Known alkynylsulfones **1** were prepared by the literature procedures.<sup>2–4</sup> The solvents were purified using standard techniques and stored over activated 4 Å molecular sieves before use. Other reagents were purchased from commercial vendors and were used as received. For known compounds **1b**, **1e**, **1g–h**, **1l–m**, **2a–h**, **2j**, **2l–m**, **2z**, **2a–c**, **4**, **6**, **8**, **10**, **11**, **12** the  $^1\text{H}$  and  $^{13}\text{C}$  NMR spectra are consistent with previously reported literature.

## 2 Preparation of the Starting Materials

### 2.1. General Procedure for the Synthesis of Starting Alkynylsulfones **1** from Arylsulfonyl Chlorides

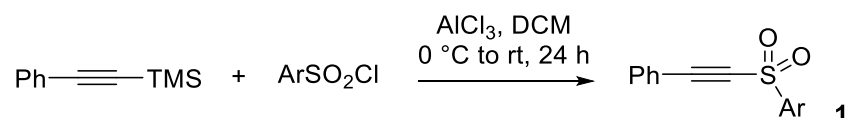

$\text{AlCl}_3$  (160 mg, 1.2 mmol, 1.2 equiv) was added to a solution of arylsulfonyl chloride (1.0 mmol) in DCM (5 mL) under argon atmosphere. The resulting mixture was stirred for 30 min and cooled to 0 °C. A solution of trimethyl(phenylethynyl)silane (209 mg, 1.2 mmol, 1.2 equiv) in DCM (5 mL) was then added dropwise. Upon completion, the reaction mixture was warmed to room temperature and stirred overnight. The reaction was carefully quenched with 10% HCl aqueous solution (30 ml) and extracted with DCM (2×20 mL). The combined organic extracts were dried over anhydrous  $\text{Na}_2\text{SO}_4$ . After filtration, the solvent was removed in vacuum, and the residue was separated by column chromatography (silica gel), eluting with hexane/EtOAc to afford alkynylsulfone **1**.

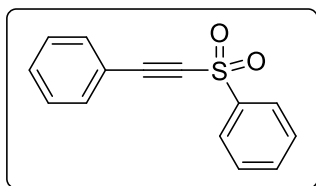

**(Phenylethynyl)sulfonylbenzene<sup>2</sup> (1b)**: brown solid (102 mg, 42%);  $R_f$  0.30 (hexane/EtOAc 4:1);  $^1\text{H NMR}$  (400 MHz,  $\text{CDCl}_3$ )  $\delta$  8.11–8.05 (m, 2H, Ar), 7.68 (t,  $J = 7.4$  Hz, 1H, Ar), 7.59 (t,  $J = 7.6$  Hz, 2H, Ar), 7.53–7.43 (m, 3H, Ar), 7.35 (t,  $J = 7.6$  Hz, 2H, Ar);  $^{13}\text{C NMR}$  (100 MHz,  $\text{CDCl}_3$ )  $\delta$  141.8, 134.3, 132.7, 131.7, 129.5, 128.7, 127.4, 117.8, 93.6, 85.4; **HRMS** (ESI):  $m/z$   $[\text{M} + \text{Na}]^+$  calcd. for  $\text{C}_{14}\text{H}_{10}\text{NaO}_2\text{S}^+$ : 265.0294; found: 265.0286.

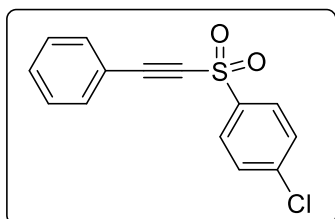

**1-Chloro-4-((phenylethynyl)sulfonyl)benzene<sup>2</sup> (1e)**: colorless solid (122 mg, 44%);  $R_f$  0.45 (hexane/EtOAc 4:1);  $R_f$  0.45 (hexane/EtOAc 4:1);  $^1\text{H NMR}$  (400 MHz,  $\text{CDCl}_3$ )  $\delta$  8.02 (d,  $J = 8.7$  Hz, 2H, Ar), 7.57 (d,  $J = 8.7$  Hz, 2H, Ar), 7.54–7.46 (m, 3H, Ar), 7.38 (t,  $J = 7.6$  Hz, 2H, Ar);  $^{13}\text{C NMR}$  (100 MHz,  $\text{CDCl}_3$ )  $\delta$  141.1, 140.4, 132.9, 131.9, 129.9, 129.0, 128.9, 117.7, 94.1, 85.2; **HRMS** (ESI):  $m/z$   $[\text{M} + \text{Na}]^+$  calcd. for  $\text{C}_{14}\text{H}_9\text{ClNaO}_2\text{S}^+$ : 298.9904; found: 298.9907.

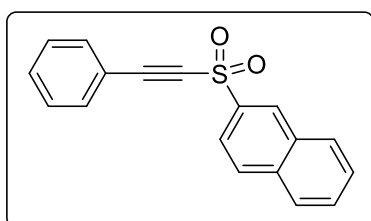

**2-((Phenylethynyl)sulfonyl)naphthalene<sup>5</sup> (1g)**: brown solid (135 mg, 46%);  $R_f$  0.30 (hexane/EtOAc 4:1);  $R_f$  0.30 (hexane/EtOAc 4:1);  $^1\text{H NMR}$  (400 MHz,  $\text{CDCl}_3$ )  $\delta$  8.65 (s, 1H, Ar), 8.09–8.00 (m, 3H, Ar), 7.94 (d,  $J = 8.4$  Hz, 1H, Ar),

7.72–7.61 (m, 2H, Ar), 7.53–7.50 (m, 2H, Ar), 7.45 (t,  $J = 7.5$  Hz, 1H), 7.35 (t,  $J = 7.5$  Hz, 2H, Ar);  $^{13}\text{C}$  NMR (100 MHz,  $\text{CDCl}_3$ )  $\delta$  138.7, 135.6, 132.8, 132.2, 131.7, 129.9, 129.7, 129.7, 129.3, 128.8, 128.1, 128.0, 122.2, 118.0, 93.8, 85.6; HRMS (ESI):  $m/z$   $[\text{M} + \text{Na}]^+$  calcd. for  $\text{C}_{18}\text{H}_{12}\text{NaO}_2\text{S}^+$ : 315.0450; found: 315.0453.

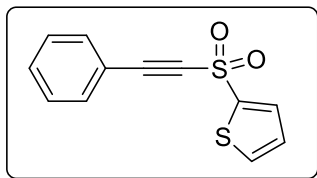

**2-((Phenylethynyl)sulfonyl)thiophene (1v)**: brown solid 84.3 mg, 34%); mp 75.0–77.0 °C (hexane/EtOAc);  $R_f$  0.50 (hexane/EtOAc 2:1);  $^1\text{H}$  NMR (400 MHz,  $\text{CDCl}_3$ )  $\delta$  7.89 (dd,  $J = 3.8, 1.4$  Hz, 1H, Ar), 7.79 (dd,  $J = 4.9, 1.4$  Hz, 1H, Ar), 7.57–7.49 (m, 2H, Ar), 7.51 (t,  $J = 7.5$  Hz, 1H, Ar), 7.40 (t,  $J = 7.6$  Hz, 2H, Ar), 7.20 (dd,  $J = 5.0, 3.8$  Hz, 1H, Ar);  $^{13}\text{C}$  NMR (100 MHz,  $\text{CDCl}_3$ )  $\delta$  143.0, 135.0, 134.4, 132.9, 131.8, 128.8, 128.1, 117.9, 93.4, 85.8; HRMS (ESI):  $m/z$   $[\text{M} + \text{Na}]^+$  calcd. for  $\text{C}_{12}\text{H}_8\text{NaO}_2\text{S}_2^+$ : 270.9858; found: 270.9856.

## 2.2. General Procedure for the Synthesis of Starting Alkynylsulfones **1** from Alkenyldibromides

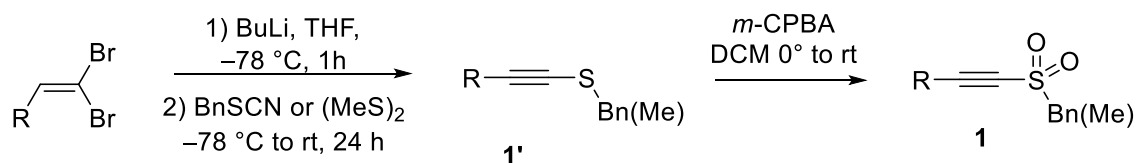

To a dry and degassed 3-necked round bottom flask was charged alkenyldibromide **1''** (1.0 mmol, prepared by the reported procedure<sup>6</sup>) and anhydrous THF (10 mL). The solution was cooled to  $-78$  °C under dry argon atmosphere, and *n*-butyllithium (2.5 M in hexanes, 0.88 mL, 2.2 equiv) was added dropwise. The reaction mixture was stirred for 1 h at  $-78$  °C, and a solution of benzyl thiocyanate (179 mg, 1.2 mmol, 1.2 equiv) or dimethyl disulfide (113 mg, 1.2 mmol, 1.2 equiv) in anhydrous THF (2 mL) were added dropwise. The reaction was allowed to warm to room temperature and stirred 24 h. The reaction was quenched by addition of saturated aqueous  $\text{NH}_4\text{Cl}$  (30 mL) and extracted with DCM ( $3 \times 20$  mL). The combined organic extracts were dried over anhydrous  $\text{Na}_2\text{SO}_4$ , and the solvent was evaporated under reduced pressure to afford a crude alkynylsulfide **1'**.

Most of alkynylsulfides **1'** were difficult to purify due to similar  $R_f$ s to the starting materials and various impurities, therefore **1'** were immediately oxidized to the corresponding alkynylsulfones **1**. *m*-Chloroperoxybenzoic acid (77%, 672 mg, 3.0 mmol, 3.0 equiv) was added



portionwise to a stirred solution of the crude alkynylsulfide **1'** in dichloromethane (10 mL) at 0 °C. Then, the reaction was stirred at room temperature for 24 h. Next, aqueous K<sub>2</sub>CO<sub>3</sub> (10%, 50 mL) was added, and the emulsion was extracted by DCM (3 × 50 mL). The combined organic extracts were dried over anhydrous K<sub>2</sub>CO<sub>3</sub>. After filtration, the solvent was removed in vacuum, and the residue was separated by column chromatography (silica gel), eluting with hexane/EtOAc to afford alkynylsulfone **1**.

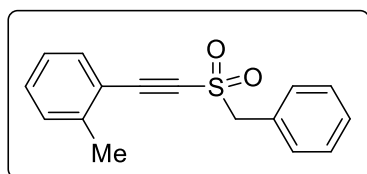

**1-((Benzylsulfonyl)ethynyl)-2-methylbenzene (1n):**

colorless solid (243 mg, 90%); mp 77.5–79.5 °C (hexane/EtOAc); *R<sub>f</sub>* 0.35 (hexane/EtOAc 4:1); **<sup>1</sup>H NMR** (400 MHz, CDCl<sub>3</sub>) δ 7.49 (dd, *J* = 6.6, 2.9 Hz, 2H, Ar), 7.44–7.38 (m, 4H, Ar), 7.38–7.34 (m, 1H, Ar), 7.21 (d, *J* = 7.8 Hz, 1H, Ar), 7.18 (t, *J* = 7.9 Hz, 1H, Ar), 4.51 (s, 2H, CH<sub>2</sub>), 2.29 (s, 3H, Me); **<sup>13</sup>C NMR** (100 MHz, CDCl<sub>3</sub>) δ 142.4, 133.2, 131.7, 131.2, 129.9, 129.3, 128.8, 127.4, 125.9, 117.2, 93.5, 86.2, 64.5, 20.3; **HRMS** (ESI): *m/z* [M + Na]<sup>+</sup> calcd. for C<sub>16</sub>H<sub>14</sub>NaO<sub>2</sub>S<sup>+</sup>: 293.0607; found: 293.0603.

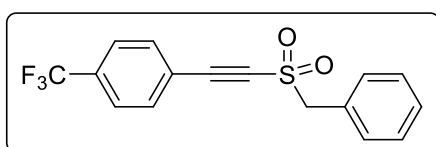

**1-((Benzylsulfonyl)ethynyl)-4-**

**(trifluoromethyl)benzene (1o):** colorless solid (350 mg, 89%); mp 123.5–125.5 °C (hexane/EtOAc); *R<sub>f</sub>* 0.40 (hexane/EtOAc 4:1); **<sup>1</sup>H NMR** (400 MHz, CDCl<sub>3</sub>) δ 7.66 (d, *J* = 8.0 Hz, 2H, Ar), 7.57 (d, *J* = 8.1 Hz, 2H, Ar), 7.49–7.41 (m, 5H, Ar), 4.52 (s, 2H, CH<sub>2</sub>); **<sup>13</sup>C NMR** (100 MHz, CDCl<sub>3</sub>) δ 133.4 (q, *J<sub>F</sub>* = 33.1 Hz), 133.2, 131.4, 129.7, 129.1, 127.1, 125.9 (q, *J<sub>F</sub>* = 3.7 Hz), 123.4 (q, *J<sub>F</sub>* = 272.7 Hz), 121.5, 91.8, 84.4, 64.7; **<sup>19</sup>F NMR** (376 MHz, CDCl<sub>3</sub>) δ –63.34; **HRMS** (ESI): *m/z* [M + Na]<sup>+</sup> calcd. for C<sub>16</sub>H<sub>11</sub>F<sub>3</sub>NaO<sub>2</sub>S<sup>+</sup>: 347.0324; found: 347.0322.

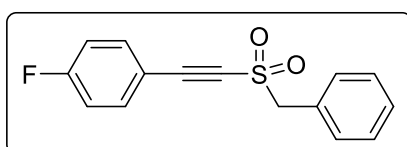

**1-((Benzylsulfonyl)ethynyl)-4-fluorobenzene (1p):**

colorless solid (222 mg, 81%); mp 93.0–95.0 °C (hexane/EtOAc); *R<sub>f</sub>* 0.35 (hexane/EtOAc 4:1); **<sup>1</sup>H NMR** (400 MHz, CDCl<sub>3</sub>) δ 7.48–7.39 (m, 7H, Ar), 7.09 (t, *J* = 8.6 Hz, 2H, Ar), 4.50 (s, 2H, CH<sub>2</sub>); **<sup>13</sup>C NMR** (100 MHz, CDCl<sub>3</sub>) δ 164.6 (d, *J<sub>F</sub>* = 255.5 Hz, CF), 135.3 (d, *J<sub>F</sub>* = 9.2 Hz, CH), 131.4, 129.6, 129.0, 127.4, 116.6 (d, *J<sub>F</sub>* = 22.5 Hz, CH), 113.8 (d, *J<sub>F</sub>* = 3.5 Hz, C), 93.2, 82.8 (d, *J<sub>F</sub>* = 1.8 Hz, C), 64.7; **<sup>19</sup>F NMR** (376 MHz, CDCl<sub>3</sub>) δ –104.05; **HRMS** (ESI): *m/z* [M + Na]<sup>+</sup> calcd. for C<sub>15</sub>H<sub>11</sub>FNaO<sub>2</sub>S<sup>+</sup>: 297.0356; found: 297.0352.

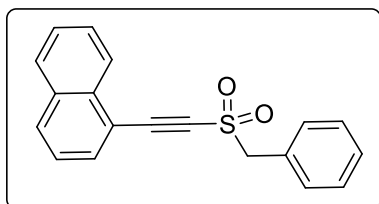

**1-((Benzylsulfonyl)ethynyl)naphthalene (1t):** yellow solid (156 mg, 51%); mp 78.0–80.0 °C (hexane/EtOAc);  $R_f$  0.30 (hexane/EtOAc 4:1);  $^1\text{H NMR}$  (400 MHz,  $\text{CDCl}_3$ )  $\delta$  7.99 (d,  $J = 8.4$  Hz, 1H, Ar), 7.92–7.85 (m, 2H, Ar), 7.74 (dd,  $J = 7.2$ , 1.2 Hz, 1H, Ar), 7.58–7.52 (m, 4H, Ar), 7.51–7.42 (m, 4H, Ar), 4.58 (s, 2H,  $\text{CH}_2$ );  $^{13}\text{C NMR}$  (100 MHz,  $\text{CDCl}_3$ )  $\delta$  133.5, 133.3, 133.0, 132.6, 131.4, 129.5, 129.1, 128.7, 128.2, 127.5, 127.3, 125.6, 125.1, 115.1, 93.2, 87.2, 64.9; **HRMS** (ESI):  $m/z$   $[\text{M} + \text{Na}]^+$  calcd. for  $\text{C}_{19}\text{H}_{14}\text{NaO}_2\text{S}^+$ : 329.0607; found: 329.0597.

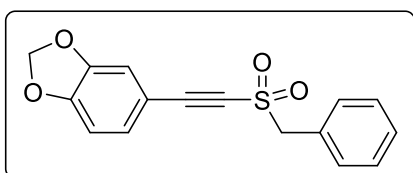

**5-((Benzylsulfonyl)ethynyl)benzo[*d*][1,3]dioxole (1w):** yellow solid (180 mg, 60%); mp 100.0–102.0 °C (hexane/EtOAc);  $R_f$  0.45 (hexane/EtOAc 2:1);  $^1\text{H NMR}$  (400 MHz,  $\text{CDCl}_3$ )  $\delta$  7.49–7.37 (m, 5H, Ar), 7.02 (dd,  $J = 8.1$ , 1.7 Hz, 1H, Ar), 6.83 (d,  $J = 1.7$  Hz, 1H, Ar), 6.79 (d,  $J = 8.1$  Hz, 1H, Ar), 6.01 (s, 2H,  $\text{CH}_2$ ), 4.48 (s, 2H,  $\text{CH}_2$ );  $^{13}\text{C NMR}$  (100 MHz,  $\text{CDCl}_3$ )  $\delta$  151.0, 147.8, 131.3, 129.4, 129.0, 128.9, 127.5, 112.0, 110.3, 109.0, 102.1, 94.9, 81.5, 64.7; **HRMS** (ESI):  $m/z$   $[\text{M} + \text{Na}]^+$  calcd. for  $\text{C}_{16}\text{H}_{12}\text{NaO}_4\text{S}^+$ : 323.0349; found: 323.0342.

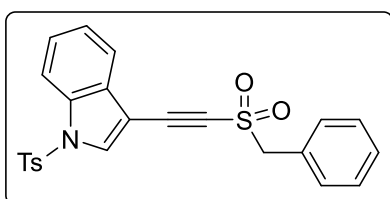

**3-((Benzylsulfonyl)ethynyl)-1-tosyl-1H-indole (1x):** orange oil (157 mg, 35%);  $R_f$  0.50 (hexane/EtOAc 2:1);  $^1\text{H NMR}$  (400 MHz,  $\text{CDCl}_3$ )  $\delta$  7.97 (d,  $J = 8.4$  Hz, 1H, Ar), 7.92 (s, 1H, Ar), 7.80 (d,  $J = 8.2$  Hz, 2H, Ar), 7.52–7.46 (m, 2H, Ar), 7.46–7.36 (m, 5H, Ar), 7.31–7.26 (m, 3H, Ar), 4.53 (s, 2H,  $\text{CH}_2$ ), 2.36 (s, 3H, Me);  $^{13}\text{C NMR}$  (100 MHz,  $\text{CDCl}_3$ )  $\delta$  146.3, 134.3, 133.9, 133.5, 131.3, 130.4, 129.5, 129.4, 129.0, 127.4, 127.2, 126.3, 124.5, 120.6, 113.8, 99.4, 87.7, 87.0, 64.8, 21.7; **HRMS** (ESI):  $m/z$   $[\text{M} + \text{Na}]^+$  calcd. for  $\text{C}_{24}\text{H}_{19}\text{NNaO}_4\text{S}_2^+$ : 472.0648; found: 472.0643.

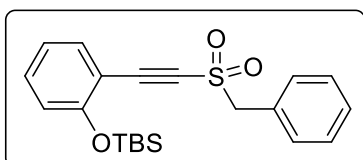

**(2-((Benzylsulfonyl)ethynyl)phenoxy)(*tert*-butyl)dimethylsilane (1ae):** colorless oil (73 mg, 19%);  $R_f$  0.30 (hexane/EtOAc 2:1);  $^1\text{H NMR}$  (400 MHz,  $\text{CDCl}_3$ )  $\delta$  7.48–7.45 (m, 2H, Ar), 7.41–7.38 (m, 3H, Ar), 7.37–7.33 (m, 2H, Ar), 6.95 (d,  $J = 7.6$  Hz, 1H, Ar), 6.86 (d,  $J = 8.2$  Hz, 1H, Ar), 4.48 (s, 2H,  $\text{CH}_2$ ), 1.02 (s, 9H, Me), 0.23 (s, 6H, Me);  $^{13}\text{C NMR}$  (100 MHz,  $\text{CDCl}_3$ )  $\delta$  158.7, 134.6, 133.3, 131.4, 129.4, 128.9, 127.3, 121.5, 120.0, 110.3, 92.6, 86.2, 64.7, 25.7, 18.3, -4.3; **HRMS** (ESI):  $m/z$   $[\text{M} + \text{Na}]^+$  calcd. for  $\text{C}_{21}\text{H}_{26}\text{NaO}_3\text{SSi}^+$ : 409.1264; found: 409.1262.

### 2.3. General Procedure for the Synthesis of Starting Alkynylsulfones **1** from Terminal Alkynes

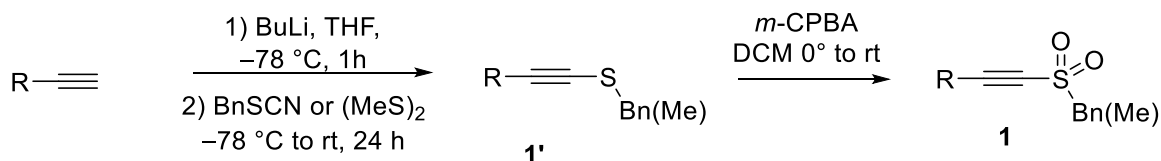

To a dry and degassed 3-necked round bottom flask was charged terminal alkyne (1.0 mmol) and anhydrous THF (10 mL). The solution was cooled to  $-78\text{ }^\circ\text{C}$  under dry argon atmosphere, and *n*-butyllithium (2.5 M in hexanes, 0.44 mL, 1.1 equiv) was added dropwise. The reaction mixture was stirred for 1 h at  $-78\text{ }^\circ\text{C}$ , and a solution of benzyl thiocyanate (179 mg, 1.2 mmol, 1.2 equiv) or dimethyl disulfide (113 mg, 1.2 mmol, 1.2 equiv) in anhydrous THF (2 mL) were added dropwise. The reaction was allowed to warm to room temperature and stirred 24 h. The reaction was quenched by addition of saturated aqueous  $\text{NH}_4\text{Cl}$  (30 mL) and extracted with DCM ( $3 \times 20$  mL). The combined organic extracts were dried over anhydrous  $\text{Na}_2\text{SO}_4$ , and the solvent was evaporated under reduced pressure to afford a crude alkynylsulfide **1'**.

Most of alkynylsulfides **1'** were difficult to purify due to similar  $R_f$ s to the starting materials and various impurities, therefore **1'** were immediately oxidized to the corresponding alkynylsulfones **1**. **1**. *m*-Chloroperoxybenzoic acid (77%, 672 mg, 3.0 mmol, 3.0 equiv) was added portionwise to a stirred solution of the crude alkynylsulfide **1'** in dichloromethane (10 mL) at  $0\text{ }^\circ\text{C}$ . Then, the reaction was stirred at room temperature for 24 h. Next, aqueous  $\text{K}_2\text{CO}_3$  (10%, 50 mL) was added, and the emulsion was extracted by DCM ( $3 \times 50$  mL). The combined organic extracts were dried over anhydrous  $\text{K}_2\text{CO}_3$ . After filtration, the solvent was removed in vacuum, and the residue was separated by column chromatography (silica gel), eluting with hexane/EtOAc to afford alkynylsulfone **1**.

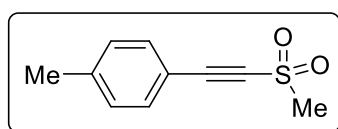

**1-Methyl-4-((methylsulfonyl)ethynyl)benzene**<sup>7</sup> (**11**): colorless solid (66 mg, 34%);  $R_f$  0.50 (hexane/EtOAc 2:1);  $^1\text{H NMR}$  (400 MHz,  $\text{CDCl}_3$ )  $\delta$  7.48 (d,  $J = 8.3$  Hz, 2H, Ar), 7.22 (d,  $J = 7.6$  Hz, 2H, Ar), 3.29 (s, 3H, Me), 2.40 (s, 3H, Me);  $^{13}\text{C NMR}$  (100 MHz,  $\text{CDCl}_3$ )  $\delta$  142.8, 132.9, 129.7, 114.5, 92.4, 84.2, 47.0, 21.9; **HRMS** (ESI):  $m/z$   $[\text{M} + \text{Na}]^+$  calcd. for  $\text{C}_{10}\text{H}_{10}\text{NaO}_2\text{S}^+$ : 217.0294; found: 217.0290.

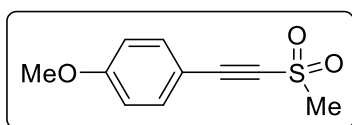

**1-Methoxy-4-((methylsulfonyl)ethynyl)benzene<sup>7</sup> (1m):**

colorless solid (133 mg, 32%); mp 55.0–57.0 °C (hexane/EtOAc);  $R_f$  0.30 (hexane/EtOAc 2:1);  $^1\text{H NMR}$  (400 MHz,  $\text{CDCl}_3$ )  $\delta$  7.50 (d,  $J = 8.8$  Hz, 2H, Ar), 6.88 (d,  $J = 8.8$  Hz, 2H, Ar), 3.81 (s, 3H, Me), 3.26 (s, 3H, Me);  $^{13}\text{C NMR}$  (100 MHz,  $\text{CDCl}_3$ )  $\delta$  162.3, 134.8, 114.6, 109.0, 92.7, 83.8, 55.5, 46.9; **HRMS** (ESI):  $m/z$   $[\text{M} + \text{Na}]^+$  calcd. for  $\text{C}_{10}\text{H}_{10}\text{NaO}_3\text{S}^+$ : 233.0243; found: 233.0242.

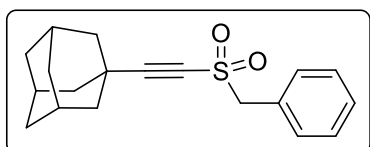

**1-((Benzylsulfonyl)ethynyl)adamantine (1u):**

colorless solid (201 mg, 64%); mp 115.0–117.0 °C (hexane/EtOAc);  $R_f$  0.40 (hexane/EtOAc 4:1);  $^1\text{H NMR}$  (400 MHz,  $\text{CDCl}_3$ )  $\delta$  7.41 (br. s, 5H, Ar), 4.36 (s, 2H,  $\text{CH}_2$ ), 1.97 (br. s, 3H, CH), 1.81 (d,  $J = 2.3$  Hz, 6H,  $\text{CH}_2$ ), 1.68 (q,  $J = 12.4$  Hz, 6H,  $\text{CH}_2$ );  $^{13}\text{C NMR}$  (100 MHz,  $\text{CDCl}_3$ )  $\delta$  131.3, 129.4, 128.9, 127.8, 103.8, 74.2, 64.6, 40.9, 36.0, 30.0, 27.4; **HRMS** (ESI):  $m/z$   $[\text{M} + \text{Na}]^+$  calcd. for  $\text{C}_{19}\text{H}_{22}\text{NaO}_2\text{S}^+$ : 337.1233; found: 337.1225.

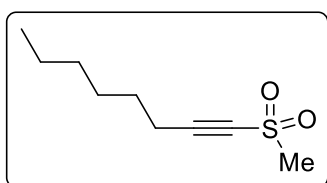

**1-(Methylsulfonyl)oct-1-yne (1z):**

colorless oil (180 mg, 48%);  $R_f$  0.30 (hexane/EtOAc 4:1);  $^1\text{H NMR}$  (400 MHz,  $\text{CDCl}_3$ )  $\delta$  3.10 (s, 3H, Me), 2.34 (t,  $J = 7.2$  Hz, 2H,  $\text{CH}_2$ ), 1.53 (p,  $J = 7.2$  Hz, 2H,  $\text{CH}_2$ ), 1.37–1.29 (m, 2H,  $\text{CH}_2$ ), 1.28–1.17 (m, 4H,  $\text{CH}_2$ ), 0.82 (t,  $J = 6.8$  Hz, 3H, Me);  $^{13}\text{C NMR}$  (100 MHz,  $\text{CDCl}_3$ )  $\delta$  95.6, 77.2, 46.6, 30.9, 28.3, 26.8, 22.2, 18.5, 13.8; **HRMS** (ESI):  $m/z$   $[\text{M} + \text{Na}]^+$  calcd. for  $\text{C}_9\text{H}_{16}\text{NaO}_2^+$ : 211.0763; found: 211.0765.

## 2.4. General Procedure for the Synthesis of Starting Alkynylsulfones **1** from Alkynyl

### Bromides

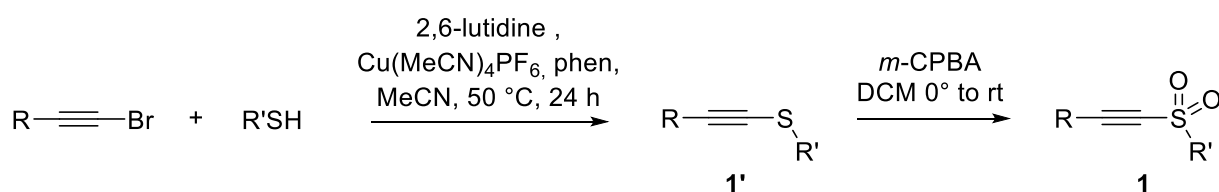

A 50 mL round-bottom flask was charged with alkynylbromide **1''** (1.0 mmol, prepared by the reported procedures<sup>8,9</sup>),  $\text{Cu}(\text{MeCN})_4\text{PF}_6$  (74.5 mg, 0.2 mmol, 20 mol %), and 1,10-phenanthroline monohydrate (39.6 mg, 0.2 mmol, 20 mol %). The flask was fitted with a rubber septum, evacuated under high vacuum and backfilled with argon. Dry degassed acetonitrile (10 mL), 2,6-lutidine (214 mg, 2.0 mmol, 2.0 equiv) and the corresponding mercaptan (1.5 mmol,

1.5 equiv) were next added and the dark red suspension was heated at 50 °C for 24 h with stirring. After completion, all volatile components were removed in vacuum, the dark green residue was suspended in DCM (50 mL) and filtered through a short pad of silica gel. The solvent was evaporated under reduced pressure to afford a crude alkynylsulfide **1'**.

Most of alkynylsulfides **1'** were difficult to purify due to similar  $R_f$ s to the starting materials and various impurities, therefore **1'** were immediately oxidized to the corresponding alkynylsulfones **1**. **1**. *m*-Chloroperoxybenzoic acid (77%, 672 mg, 3.0 mmol, 3.0 equiv) was added portionwise to a stirred solution of the crude alkynylsulfide **1'** in dichloromethane (10 mL) at 0 °C. Then, the reaction was stirred at room temperature for 24 h. Next, aqueous  $K_2CO_3$  (10%, 50 mL) was added, and the emulsion was extracted by DCM (3 × 50 mL). The combined organic extracts were dried over anhydrous  $K_2CO_3$ . After filtration, the solvent was removed in vacuum, and the residue was separated by column chromatography (silica gel), eluting with hexane/EtOAc to afford alkynylsulfone **1**.

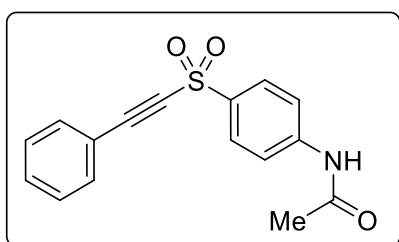

**N-(4-((Phenylethynyl)sulfonyl)phenyl)acetamide**<sup>10</sup> (**1h**):

colorless oil (182 mg, 61%);  $R_f$  0.40 (hexane/EtOAc 1:2);

<sup>1</sup>H NMR (400 MHz,  $CDCl_3$ )  $\delta$  7.53–7.48 (m, 4H, Ar), 7.44 (d,  $J$  = 8.8 Hz, 2H, Ar), 7.35–7.32 (m, 3H, Ar), 7.26 (br. s, 1H, NH), 2.18 (s, 3H, Me); <sup>13</sup>C NMR (100 MHz,  $CDCl_3$ )  $\delta$

168.4, 136.9, 131.9, 128.8, 128.5, 127.9, 127.5, 123.0, 120.9, 97.7, 75.9, 24.8; HRMS (ESI):  $m/z$   $[M + Na]^+$  calcd. for  $C_{16}H_{13}NNaO_3S^+$ : 322.0508; found: 322.0510.

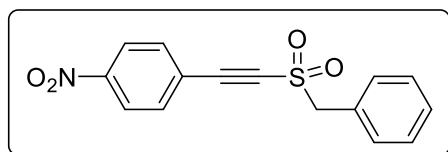

**1-((Benzylsulfonyl)ethynyl)-4-nitrobenzene** (**1q**):

colorless solid (181 mg, 60%); mp 135.5–137.5 °C (hexane/EtOAc);  $R_f$  0.50 (hexane/EtOAc 2:1); <sup>1</sup>H

NMR (400 MHz,  $CDCl_3$ )  $\delta$  8.25 (d,  $J$  = 8.8 Hz, 2H, Ar), 7.62 (d,  $J$  = 8.8 Hz, 2H, Ar), 7.53–7.36 (m, 5H, Ar), 4.53 (s, 2H,  $CH_2$ ); <sup>13</sup>C NMR (100 MHz,  $CDCl_3$ )  $\delta$  149.3, 133.8, 131.4, 129.8, 129.2, 127.0, 124.2, 124.0, 90.6, 86.3, 64.7; HRMS (ESI):  $m/z$   $[M + Na]^+$  calcd. for  $C_{15}H_{11}NNaO_4S^+$ : 324.0301; found: 324.0298.

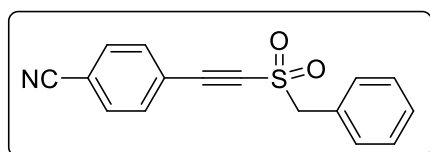

**4-((Benzylsulfonyl)ethynyl)benzonitrile** (**1r**): colorless solid (177 mg, 63%); mp 125.0–126.0 °C (hexane/EtOAc);  $R_f$  0.60 (hexane/EtOAc 2:1); <sup>1</sup>H NMR

(400 MHz,  $CDCl_3$ )  $\delta$  7.67 (d,  $J$  = 8.3 Hz, 2H, Ar), 7.53 (d,  $J$  = 8.3 Hz, 2H, Ar), 7.50–7.39 (m, 5H, Ar), 4.52 (s, 2H,  $CH_2$ ); <sup>13</sup>C NMR (100 MHz,  $CDCl_3$ )  $\delta$  133.2, 132.4, 131.3, 129.7,

129.1, 126.9, 122.3, 117.6, 115.2, 91.0, 85.7, 64.6; **HRMS** (ESI):  $m/z$   $[M + Na]^+$  calcd. for  $C_{16}H_{11}NNaO_2S^+$ : 304.0403; found: 304.0405.

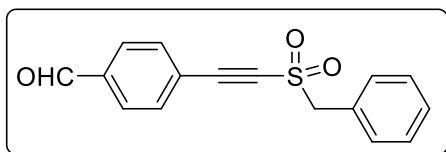

**4-((Benzylsulfonyl)ethynyl)benzaldehyde (1s):**

colorless oil (22.7 mg, 8%);  $R_f$  0.40 (hexane/EtOAc 2:1);  $^1H$  NMR (400 MHz,  $CDCl_3$ )  $\delta$  10.05 (s, 1H, CH), 7.89 (d,  $J = 8.3$  Hz, 2H, Ar), 7.61 (d,  $J = 8.2$  Hz, 2H, Ar), 7.51–7.39 (m, 5H, Ar), 4.53 (s, 2H,  $CH_2$ );  $^{13}C$  NMR (100 MHz,  $CDCl_3$ )  $\delta$  191.0, 137.9, 133.4, 131.4, 129.7 ( $\times 2$ ), 129.1, 127.1, 123.4, 92.1, 85.3, 64.7; **HRMS** (ESI):  $m/z$   $[M + Na]^+$  calcd. for  $C_{16}H_{12}NaO_3S^+$ : 307.0399; found: 307.0400.

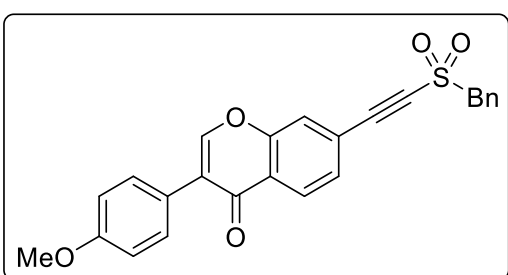

**7-((Benzylsulfonyl)ethynyl)-3-(4-methoxyphenyl)-**

**4H-chromen-4-one (1aa):** colorless oil; (138 mg,

32%);  $R_f$  0.30 (hexane/EtOAc 2:1);  $^1H$  NMR (400 MHz,  $CDCl_3$ )  $\delta$  8.31 (d,  $J = 8.2$  Hz, 1H, Ar), 8.02 (s, 1H, Ar), 7.59 (d,  $J = 1.5$  Hz, 1H, Ar), 7.51–7.41 (m, 8H, Ar), 6.98 (d,  $J = 8.8$  Hz, 2H, Ar), 4.54 (s, 2H,  $CH_2$ ), 3.85 (s, 3H, Me);  $^{13}C$  NMR (100 MHz,  $CDCl_3$ )  $\delta$  175.5, 160.1, 155.5, 152.9, 131.4, 130.2, 129.8, 129.2, 128.4, 127.4, 127.1, 126.4, 126.0, 123.4, 123.0, 122.5, 114.3, 91.4, 85.1, 64.8, 55.5; **HRMS** (ESI):  $m/z$   $[M + Na]^+$  calcd. for  $C_{25}H_{18}NaO_5S^+$ : 453.0767; found: 453.0757.

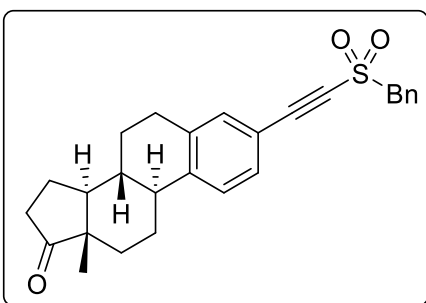

**(8R,9S,13S,14S)-3-((Benzylsulfonyl)ethynyl)-13-methyl-**

**6,7,8,9,11,12,13,14,15,16-decahydro-17H-**

**cyclopenta[a]phenanthren-17-one (1ab):** colorless oil

(221 mg, 51%);  $R_f$  0.30 (hexane/EtOAc 2:1);  $^1H$  NMR (400 MHz,  $CDCl_3$ )  $\delta$  7.48–7.44 (m, 2H, Ar), 7.42–7.38 (m, 3H, Ar), 7.30 (d,  $J = 8.2$  Hz, 1H, Ar), 7.24–7.21 (m, 2H, Ar), 4.48 (s, 2H,  $CH_2$ ), 2.89 (dd,  $J = 8.6, 3.9$  Hz, 2H,  $CH_2$ ), 2.55–2.48 (m, 1H, CH), 2.43–2.38 (m, 1H, CH), 2.35–2.28 (m, 1H, CH), 2.50–1.95 (m, 4H, CH), 1.68–1.40 (m, 6H, CH), 0.91 (s, 3H, Me);  $^{13}C$  NMR (100 MHz,  $CDCl_3$ )  $\delta$  220.4, 144.5, 137.5, 133.4, 131.4, 130.2, 129.5, 129.0, 127.5, 126.0, 114.8, 95.0, 82.3, 64.8, 50.6, 47.9, 44.7, 37.8, 35.9, 31.6, 29.1, 26.2, 25.6, 21.7, 13.9; **HRMS** (ESI):  $m/z$   $[M + Na]^+$  calcd. for  $C_{27}H_{28}NaO_3S^+$ : 455.1651; found: 455.1644.

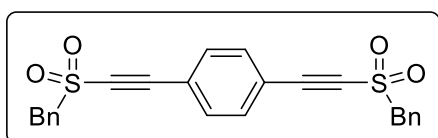

**1,4-Bis((benzylsulfonyl)ethynyl)benzene (1ad):**

colorless solid (200 mg, 46%); mp 188.0–189.0 °C

(DCM);  $R_f$  0.45 (DCM/MeOH 99:1);  $^1\text{H NMR}$  (400 MHz, DMSO- $d_6$ )  $\delta$  7.75 (s, 4H, Ar), 7.54–7.51 (m, 4H, Ar), 7.47–7.42 (m, 6H, Ar), 4.98 (s, 4H, CH<sub>2</sub>);  $^{13}\text{C NMR}$  (100 MHz, DMSO- $d_6$ )  $\delta$  133.1, 131.5, 129.1, 128.6, 127.9, 119.9, 90.9, 85.5, 63.0; **HRMS** (ESI):  $m/z$  [M + H]<sup>+</sup> calcd. for C<sub>24</sub>H<sub>19</sub>O<sub>4</sub>S<sub>2</sub><sup>+</sup>: 435.0719; found: 435.0710.

### 3 Complete Optimization Studies

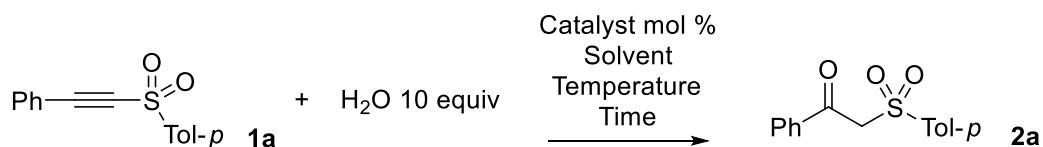

| Entry <sup>a</sup> | Catalyst                                  | mol % | Solvent          | Temperature, °C | Time, h | Yield, <sup>b</sup> % |
|--------------------|-------------------------------------------|-------|------------------|-----------------|---------|-----------------------|
| 1                  | –                                         | –     | Dioxane          | 100             | 12      | –                     |
| 2                  | –                                         | –     | THF              | 60              | 6       | –                     |
| 3                  | –                                         | –     | MeOH             | 60              | 6       | –                     |
| 4                  | –                                         | –     | Acetone          | 60              | 6       | –                     |
| 5                  | –                                         | –     | H <sub>2</sub> O | 60              | 6       | –                     |
| 6                  | Hg(OTf) <sub>2</sub>                      | 5     | THF              | rt              | 24      | 95                    |
| 7                  | MsOH                                      | 5     | THF              | rt              | 24      | –                     |
| 8                  | TfOH                                      | 5     | THF              | rt              | 24      | –                     |
| 9                  | Tf <sub>2</sub> NH                        | 5     | THF              | rt              | 24      | –                     |
| 10                 | TfOH                                      | 150   | Dioxane          | 100             | 8       | 26                    |
| 11                 | Zn(OTf) <sub>2</sub>                      | 5     | THF              | rt              | 24      | –                     |
| 12                 | Cu(OTf) <sub>2</sub>                      | 5     | THF              | rt              | 24      | –                     |
| 13                 | AgOTf                                     | 5     | THF              | rt              | 24      | 17                    |
| 14                 | PtCl <sub>2</sub>                         | 5     | THF              | rt              | 24      | 28                    |
| 15                 | Ph <sub>3</sub> PAuNTf <sub>2</sub>       | 5     | THF              | rt              | 24      | 97                    |
| 16                 | IPrAuNTf <sub>2</sub>                     | 5     | THF              | rt              | 24      | 96                    |
| 17                 | JohnPhosAuNTf <sub>2</sub>                | 5     | THF              | rt              | 24      | 97                    |
| 18                 | PicAuCl <sub>2</sub>                      | 5     | THF              | rt              | 24      | 50                    |
| 19                 | Ph <sub>3</sub> PAuCl/AgNTf <sub>2</sub>  | 5     | THF              | rt              | 24      | 96                    |
| 20                 | Ph <sub>3</sub> PAuCl/AgOTf               | 5     | THF              | rt              | 24      | 57                    |
| 21                 | Ph <sub>3</sub> PAuCl /AgSbF <sub>6</sub> | 5     | THF              | rt              | 24      | 63                    |
| 22                 | Ph <sub>3</sub> PAuNTf <sub>2</sub>       | 5     | Dioxane          | rt              | 24      | 95                    |
| 23                 | Ph <sub>3</sub> PAuNTf <sub>2</sub>       | 5     | MeCN             | rt              | 24      | 50                    |
| 24                 | Ph <sub>3</sub> PAuNTf <sub>2</sub>       | 5     | MeOH             | rt              | 24      | 94                    |
| 25                 | Ph <sub>3</sub> PAuNTf <sub>2</sub>       | 5     | EtOH             | rt              | 24      | 92                    |



|           |                                         |          |                  |           |          |           |
|-----------|-----------------------------------------|----------|------------------|-----------|----------|-----------|
| 26        | Ph <sub>3</sub> PAuNTf <sub>2</sub>     | 5        | H <sub>2</sub> O | rt        | 24       | 29        |
| 27        | Ph <sub>3</sub> PAuNTf <sub>2</sub>     | 5        | H <sub>2</sub> O | 60        | 6        | 85        |
| 28        | Ph <sub>3</sub> PAuNTf <sub>2</sub>     | 3        | THF              | rt        | 24       | 96        |
| <b>29</b> | <b>Ph<sub>3</sub>PAuNTf<sub>2</sub></b> | <b>3</b> | <b>THF</b>       | <b>60</b> | <b>3</b> | <b>98</b> |
| 30        | Ph <sub>3</sub> PAuNTf <sub>2</sub>     | 1.5      | THF              | rt        | 24       | 30        |
| 31        | Ph <sub>3</sub> PAuNTf <sub>2</sub>     | 0.5      | THF              | rt        | 24       | 6         |
| 31        | Ph <sub>3</sub> PAuNTf <sub>2</sub>     | 0.5      | THF              | 60        | 24       | 65        |

---

<sup>a</sup>All reactions were carried out on a 0.1 mmol scale (0.2 M); <sup>b</sup>Estimated by <sup>1</sup>H NMR spectroscopy using durene as an internal standard.

## 4 Experimental Procedures and Characterization Data

### 4.1. General Procedure for the Gold(I)-Catalyzed Hydration of Alkynylsulfones

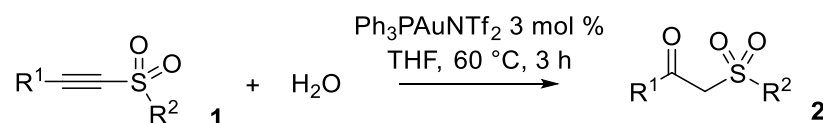

$\text{Ph}_3\text{PAuNTf}_2$  (4.4 mg, 6.0  $\mu\text{mol}$ , 3 mol %) was added to the solution of alkynylsulfones (**1**, 0.2 mmol) and water (36  $\mu\text{L}$ , 2.0 mmol, 10 equiv) in tetrahydrofuran (1.0 mL). The resulting mixture was stirred at 60  $^\circ\text{C}$  for 3 h. After completion, all volatile components were removed in vacuum and the residue was purified by silica gel chromatography eluting with hexane/EtOAc to afford  $\beta$ -ketosulfones **2**. 5 mol % of  $\text{Ph}_3\text{PAuNTf}_2$  was used for the preparation of  $\beta$ -ketosulfones **2o**, **2q–s**, and **2ab**.

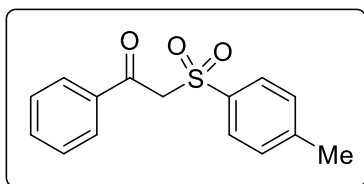

**1-Phenyl-2-tosylethan-1-one<sup>11</sup> (2a)**: colorless solid (54.6 mg, 96%); mp 109.0–111.0  $^\circ\text{C}$  (hexane/EtOAc);  $R_f$  0.35 (hexane/EtOAc 2:1);  $^1\text{H NMR}$  (400 MHz,  $\text{CDCl}_3$ )  $\delta$  7.94 (dd,  $J = 8.4, 1.3$  Hz, 2H, Ar), 7.76 (d,  $J = 8.4$  Hz, 2H, Ar), 7.61 (t,  $J = 7.4$  Hz, 1H, Ar), 7.47 (t,  $J = 7.8$  Hz, 2H, Ar), 7.33 (d,  $J = 8.1$  Hz, 2H, Ar), 4.71 (s, 2H,  $\text{CH}_2$ ), 2.44 (s, 3H, Me);  $^{13}\text{C NMR}$  (100 MHz,  $\text{CDCl}_3$ )  $\delta$  188.3, 145.5, 136.0, 135.9, 134.4, 130.0, 129.5, 129.0, 128.7, 63.7, 21.8; **HRMS** (ESI):  $m/z$   $[\text{M} + \text{Na}]^+$  calcd. for  $\text{C}_{15}\text{H}_{14}\text{NaO}_3\text{S}^+$ : 297.0556; found: 297.0554.

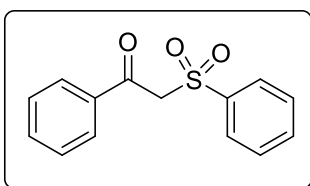

**1-Phenyl-2-(phenylsulfonyl)ethan-1-one<sup>11</sup> (2b)**: colorless solid (48.9 mg, 94%); mp 92.0–93.0  $^\circ\text{C}$  (hexane/EtOAc);  $R_f$  0.35 (hexane/EtOAc 2:1);  $^1\text{H NMR}$  (400 MHz,  $\text{CDCl}_3$ )  $\delta$  7.96–7.86 (m, 4H, Ar), 7.68–7.58 (m, 2H, Ar), 7.53 (t,  $J = 7.8$  Hz, 2H, Ar), 7.51–7.42 (m, 2H, Ar), 4.74 (s, 2H,  $\text{CH}_2$ );  $^{13}\text{C NMR}$  (100 MHz,  $\text{CDCl}_3$ )  $\delta$  188.1, 138.9, 135.9, 134.5, 134.3, 129.4, 129.3, 129.0, 128.7, 63.5; **HRMS** (ESI):  $m/z$   $[\text{M} + \text{Na}]^+$  calcd. for  $\text{C}_{14}\text{H}_{12}\text{NaO}_3\text{S}^+$ : 283.0399; found: 283.0399.

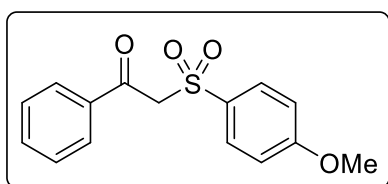

**2-((4-Methoxyphenyl)sulfonyl)-1-phenylethan-1-one<sup>11</sup> (2c)**: colorless solid (56.9 mg, 98%); mp 106.5–108.5  $^\circ\text{C}$  (hexane/EtOAc);  $R_f$  0.35 (hexane/EtOAc 2:1);  $^1\text{H NMR}$  (400 MHz,  $\text{CDCl}_3$ )  $\delta$  7.93 (d,  $J = 7.3$  Hz, 2H, Ar), 7.80 (d,  $J = 8.9$  Hz, 2H, Ar), 7.61 (t,  $J = 7.4$  Hz, 1H, Ar), 7.48 (t,  $J = 7.7$  Hz, 2H, Ar), 6.98 (d,  $J =$

9.0 Hz, 2H, Ar), 4.71 (s, 2H, CH<sub>2</sub>), 3.87 (s, 3H, Me); <sup>13</sup>C NMR (100 MHz, CDCl<sub>3</sub>) δ 188.4, 164.3, 135.9, 134.4, 131.0, 130.4, 129.4, 129.0, 114.5, 63.9, 55.8; HRMS (ESI): *m/z* [M + Na]<sup>+</sup> calcd. for C<sub>15</sub>H<sub>14</sub>NaO<sub>4</sub>S<sup>+</sup>: 313.0505; found: 313.0506.

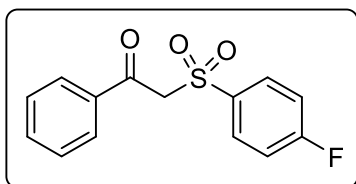

**2-((4-Fluorophenyl)sulfonyl)-1-phenylethan-1-one<sup>11</sup> (2d):** colorless solid (52.8 mg, 95%); mp 148.0–150.0 °C (hexane/EtOAc); *R<sub>f</sub>* 0.40 (hexane/EtOAc 2:1); <sup>1</sup>H NMR (400 MHz, CDCl<sub>3</sub>) δ 7.96–7.86 (m, 4H, Ar), 7.62 (t, *J* = 7.4 Hz, 1H, Ar), 7.48 (t, *J* = 7.8 Hz, 2H, Ar), 7.21 (t, *J* = 8.5 Hz, 2H, Ar), 4.74 (s, 2H, CH<sub>2</sub>); <sup>13</sup>C NMR (100 MHz, CDCl<sub>3</sub>) δ 188.1, 166.2 (d, *J<sub>F</sub>* = 257.3 Hz, CF), 135.7, 134.8 (d, *J<sub>F</sub>* = 3.2 Hz, C), 134.6, 131.8 (d, *J<sub>F</sub>* = 9.7 Hz, CH), 129.4, 129.0, 116.7 (d, *J<sub>F</sub>* = 22.8 Hz, CH), 63.5; HRMS (ESI): *m/z* [M + Na]<sup>+</sup> calcd. for C<sub>14</sub>H<sub>11</sub>FNaO<sub>3</sub>S<sup>+</sup>: 301.0305; found: 301.0301.

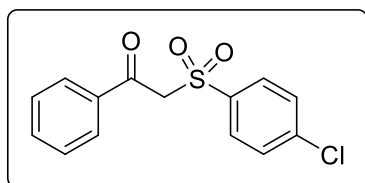

**2-((4-Chlorophenyl)sulfonyl)-1-phenylethan-1-one<sup>11</sup> (2e):** colorless solid (54.7 mg, 69%); mp 129.0–131.0 °C (hexane/EtOAc); *R<sub>f</sub>* 0.40 (hexane/EtOAc 2:1); <sup>1</sup>H NMR (400 MHz, CDCl<sub>3</sub>) δ 7.92 (d, *J* = 7.2 Hz, 2H, Ar), 7.83 (d, *J* = 8.7 Hz, 2H, Ar), 7.63 (t, *J* = 7.5 Hz, 1H, Ar), 7.55–7.44 (m, 4H, Ar), 4.74 (s, 2H, CH<sub>2</sub>); <sup>13</sup>C NMR (100 MHz, CDCl<sub>3</sub>) δ 188.0, 141.2, 137.3, 135.7, 134.6, 130.3, 129.6, 129.4, 129.1, 63.4; HRMS (ESI): *m/z* [M + Na]<sup>+</sup> calcd. for C<sub>14</sub>H<sub>11</sub>ClNaO<sub>3</sub>S<sup>+</sup>: 314.0010; found: 317.0009.

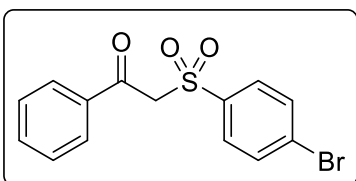

**2-((4-Bromophenyl)sulfonyl)-1-phenylethan-1-one<sup>11</sup> (2f):** colorless solid (67.1 mg, 99%); mp 104.0–105.0 °C (hexane/EtOAc); *R<sub>f</sub>* 0.45 (hexane/EtOAc 2:1); <sup>1</sup>H NMR (400 MHz, CDCl<sub>3</sub>) δ 7.93 (d, *J* = 7.1 Hz, 2H, Ar), 7.76 (d, *J* = 8.7 Hz, 2H, Ar), 7.69 (d, *J* = 8.7 Hz, 2H, Ar), 7.64 (t, *J* = 7.5 Hz, 1H, Ar), 7.49 (t, *J* = 7.8 Hz, 2H, Ar), 4.73 (s, 2H, CH<sub>2</sub>); <sup>13</sup>C NMR (100 MHz, CDCl<sub>3</sub>) δ 188.0, 137.8, 135.7, 134.7, 132.7, 130.4, 129.9, 129.4, 129.1, 63.5; HRMS (ESI): *m/z* [M + Na]<sup>+</sup> calcd. for C<sub>14</sub>H<sub>11</sub>BrNaO<sub>3</sub>S<sup>+</sup>: 360.9504; found: 360.9499.

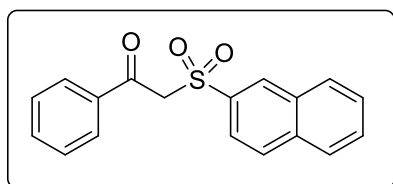

**2-((Naphthalen-2-yl)sulfonyl)-1-phenylethan-1-one<sup>11</sup> (2g):** colorless solid (57.7 mg, 93%); mp 132.5–133.5 °C (hexane/EtOAc); *R<sub>f</sub>* 0.35 (hexane/EtOAc 2:1); <sup>1</sup>H NMR (400 MHz, CDCl<sub>3</sub>) δ 8.46 (s, 1H, Ar), 8.02–7.84 (m, 6H, Ar), 7.70–7.66 (m, 1H, Ar), 7.65–7.55 (m, 2H, Ar), 7.46 (t, *J* = 7.8 Hz, 2H, Ar), 4.81 (s, 2H, CH<sub>2</sub>);

$^{13}\text{C}$  NMR (100 MHz,  $\text{CDCl}_3$ )  $\delta$  188.1, 135.9, 135.8, 135.7, 134.5, 132.2, 130.8, 129.7, 129.7, 129.7, 129.4, 129.0, 128.2, 127.9, 123.1, 63.7; **HRMS** (ESI):  $m/z$   $[\text{M} + \text{Na}]^+$  calcd. for  $\text{C}_{18}\text{H}_{14}\text{NaO}_3\text{S}^+$ : 333.0556; found: 333.0554.

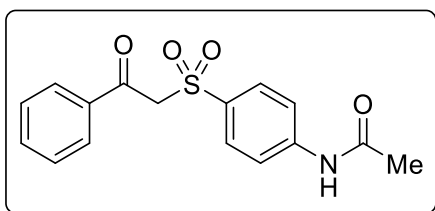

***N*-(4-((2-Oxo-2-phenylethyl)sulfonyl)phenyl)acetamide<sup>12</sup>** (**2h**): colorless solid (62.8 mg, 99%); mp 158.5–160.0 °C (hexane/EtOAc);  $R_f$  0.35 (hexane/EtOAc 1:2);  $^1\text{H}$  NMR (400 MHz,  $\text{DMSO-}d_6$ )  $\delta$  10.38 (s, 1H, NH), 7.95 (d,  $J = 7.4$  Hz, 2H, Ar), 7.82–7.76 (m, 4H, Ar), 7.66 (t,  $J = 7.4$  Hz, 1H, Ar), 7.51 (t,  $J = 7.8$  Hz, 2H, Ar), 5.23 (s, 2H,  $\text{CH}_2$ ), 2.10 (s, 3H, Me);  $^{13}\text{C}$  NMR (100 MHz,  $\text{DMSO-}d_6$ )  $\delta$  189.1, 169.1, 144.1, 135.8, 134.1, 132.8, 129.4, 129.1, 128.7, 118.4, 62.5, 24.2; **HRMS** (ESI):  $m/z$   $[\text{M} + \text{Na}]^+$  calcd. for  $\text{C}_{16}\text{H}_{15}\text{NNaO}_4\text{S}^+$ : 340.0614; found: 340.0616.

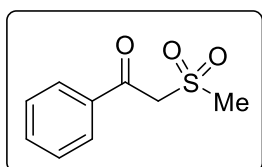

**2-(Methylsulfonyl)-1-phenylethan-1-one (**2i**)**: colorless solid (37.6 mg, 95%); mp 107.0–108.0 °C (hexane/EtOAc);  $R_f$  0.25 (hexane/EtOAc 2:1);  $^1\text{H}$  NMR (400 MHz,  $\text{CDCl}_3$ )  $\delta$  8.03–7.96 (m, 2H, Ar), 7.66 (t,  $J = 7.4$  Hz, 1H, Ar), 7.52 (t,  $J = 7.8$  Hz, 2H, Ar), 4.60 (s, 2H,  $\text{CH}_2$ ), 3.15 (s, 3H, Me);  $^{13}\text{C}$  NMR (100 MHz,  $\text{CDCl}_3$ )  $\delta$  189.4, 135.8, 134.8, 129.4, 129.2, 61.4, 42.0; **HRMS** (ESI):  $m/z$   $[\text{M} + \text{Na}]^+$  calcd. for  $\text{C}_9\text{H}_{10}\text{NaO}_3\text{S}^+$ : 221.0243; found: 221.0242.

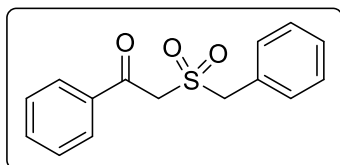

**2-(Benzyloxy)-1-phenylethan-1-one<sup>13</sup> (**2j**)**: colorless solid (51.5 mg, 94%); mp 109.0–110.0 °C (hexane/EtOAc);  $R_f$  0.45 (hexane/EtOAc 2:1);  $^1\text{H}$  NMR (400 MHz,  $\text{CDCl}_3$ )  $\delta$  7.98–7.94 (m, 2H, Ar), 7.65 (t,  $J = 7.5$  Hz, 1H, Ar), 7.56–7.49 (m, 4H, Ar), 7.42–7.39 (m, 3H, Ar), 4.55 (s, 2H,  $\text{CH}_2$ ), 4.39 (s, 2H,  $\text{CH}_2$ );  $^{13}\text{C}$  NMR (100 MHz,  $\text{CDCl}_3$ )  $\delta$  189.7, 136.0, 134.7, 131.2, 129.4, 129.2 ( $\times 2$ ), 129.1, 128.0, 60.0, 56.8; **HRMS** (ESI):  $m/z$   $[\text{M} + \text{Na}]^+$  calcd. for  $\text{C}_{15}\text{H}_{14}\text{NaO}_3\text{S}^+$ : 297.0556; found: 297.0550.

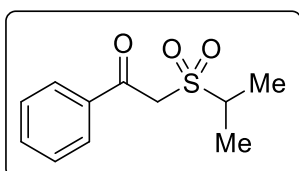

**2-(Isopropylsulfonyl)-1-phenylethan-1-one (**2k**)**: colorless solid (43.0 mg, 95%); mp 61.0–63.0 °C (hexane/EtOAc);  $R_f$  0.35 (hexane/EtOAc 2:1);  $^1\text{H}$  NMR (400 MHz,  $\text{CDCl}_3$ )  $\delta$  8.03 (d,  $J = 7.3$  Hz, 2H, Ar), 7.65 (d,  $J = 7.4$  Hz, 1H, Ar), 7.52 (t,  $J = 7.8$  Hz, 2H, Ar), 4.58 (s, 2H,  $\text{CH}_2$ ), 3.61–3.50 (m, 1H, CH), 1.46 (d,  $J = 6.9$  Hz, 6H, 2Me);  $^{13}\text{C}$  NMR (100 MHz,  $\text{CDCl}_3$ )  $\delta$  189.4, 136.0, 134.7, 129.5, 129.1, 57.1, 53.8, 15.3; **HRMS** (ESI):  $m/z$   $[\text{M} + \text{Na}]^+$  calcd. for  $\text{C}_{11}\text{H}_{14}\text{NaO}_3\text{S}^+$ : 249.0556; found: 249.0552.

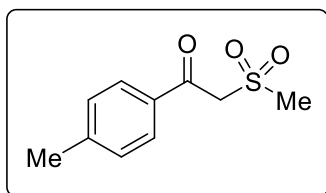

**2-(Methylsulfonyl)-1-(*p*-tolyl)ethan-1-one<sup>14</sup> (2l):** colorless solid (39.4 mg, 93%); mp 101.0–103.0 °C (hexane/EtOAc);  $R_f$  0.45 (hexane/EtOAc 1:1);  $^1\text{H NMR}$  (400 MHz,  $\text{CDCl}_3$ )  $\delta$  7.89 (d,  $J = 8.4$  Hz, 2H, Ar), 7.31 (d,  $J = 8.0$  Hz, 2H, Ar), 4.57 (s, 2H,  $\text{CH}_2$ ), 3.13 (s, 3H, Me), 2.43 (s, 3H, Me);  $^{13}\text{C NMR}$  (100 MHz,  $\text{CDCl}_3$ )  $\delta$  188.8, 146.1, 133.3, 129.8, 129.5, 61.3, 41.9, 21.9; **HRMS** (ESI):  $m/z$   $[\text{M} + \text{Na}]^+$  calcd. for  $\text{C}_{10}\text{H}_{12}\text{NaO}_3\text{S}^+$ : 235.0399; found: 235.0395.

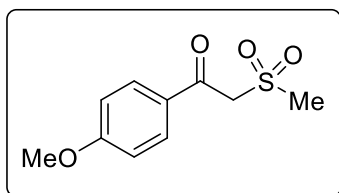

**1-(4-Methoxyphenyl)-2-(methylsulfonyl)ethan-1-one<sup>15</sup> (2m):** colorless solid (43.3 mg, 95%); mp 138.0–140.0 °C (hexane/EtOAc);  $R_f$  0.30 (hexane/EtOAc 1:1);  $^1\text{H NMR}$  (400 MHz,  $\text{CDCl}_3$ )  $\delta$  7.97 (d,  $J = 8.9$  Hz, 2H, Ar), 6.97 (d,  $J = 8.9$  Hz, 2H, Ar), 4.54 (s, 2H,  $\text{CH}_2$ ), 3.88 (s, 3H, Me), 3.12 (s, 3H, Me);  $^{13}\text{C NMR}$  (100 MHz,  $\text{CDCl}_3$ )  $\delta$  187.5, 165.0, 132.0, 128.8, 114.4, 61.3, 55.8, 41.9; **HRMS** (ESI):  $m/z$   $[\text{M} + \text{Na}]^+$  calcd. for  $\text{C}_{10}\text{H}_{12}\text{NaO}_4\text{S}^+$ : 251.0349; found: 251.0347.

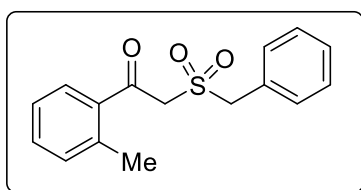

**2-(Benzylsulfonyl)-1-(*o*-tolyl)ethan-1-one (2n):** colorless solid (50.7 mg, 88%); mp 68.0–70.0 °C (hexane/EtOAc);  $R_f$  0.25 (hexane/EtOAc 4:1);  $^1\text{H NMR}$  (400 MHz,  $\text{CDCl}_3$ )  $\delta$  7.66 (d,  $J = 7.5$  Hz, 1H, Ar), 7.55 (dd,  $J = 6.5, 2.8$  Hz, 2H, Ar), 7.48–7.39 (m, 4H, Ar), 7.30 (t,  $J = 6.7$  Hz, 2H, Ar), 4.57 (s, 2H,  $\text{CH}_2$ ), 4.34 (s, 2H,  $\text{CH}_2$ ), 2.58 (s, 3H, Me);  $^{13}\text{C NMR}$  (100 MHz,  $\text{CDCl}_3$ )  $\delta$  192.2, 140.1, 136.1, 133.1, 132.6, 131.2, 130.2, 129.4, 129.2, 128.1, 126.2, 60.0, 59.0, 21.7; **HRMS** (ESI):  $m/z$   $[\text{M} + \text{Na}]^+$  calcd. for  $\text{C}_{16}\text{H}_{16}\text{NaO}_3\text{S}^+$ : 311.0712; found: 311.0707.

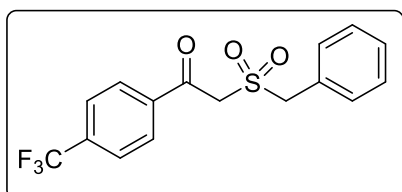

**2-(Benzylsulfonyl)-1-(4-(trifluoromethyl)phenyl)ethan-1-one (2o):** colorless solid (63.6 mg, 93%); mp 178.0–180.0 °C (hexane/EtOAc);  $R_f$  0.25 (hexane/EtOAc 4:1);  $^1\text{H NMR}$  (400 MHz,  $\text{CDCl}_3$ )  $\delta$  8.08 (d,  $J = 8.1$  Hz, 2H, Ar), 7.78 (d,  $J = 8.1$  Hz, 2H, Ar), 7.57–7.51 (m, 2H, Ar), 7.45–7.39 (m, 3H, Ar), 4.52 (s, 2H,  $\text{CH}_2$ ), 4.41 (s, 2H,  $\text{CH}_2$ );  $^{13}\text{C NMR}$  (100 MHz,  $\text{CDCl}_3$ )  $\delta$  189.0, 138.6, 135.8 (q,  $J_F = 32.9$  Hz, C), 131.2, 129.7, 129.6, 129.2, 127.7, 126.2 (q,  $J_F = 3.7$  Hz, CH), 123.4 (q,  $J_F = 273.0$  Hz,  $\text{CF}_3$ ), 60.0, 57.1;  $^{19}\text{F NMR}$  (376 MHz,  $\text{CDCl}_3$ )  $\delta$  -63.36; **HRMS** (ESI):  $m/z$   $[\text{M} + \text{Na}]^+$  calcd. for  $\text{C}_{16}\text{H}_{13}\text{F}_3\text{NaO}_3\text{S}^+$ : 365.0430; found: 365.0433.

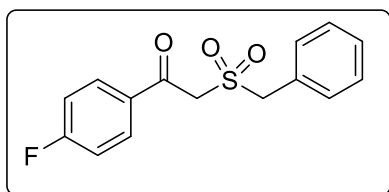

**2-(Benzylsulfonyl)-1-(4-fluorophenyl)ethan-1-one (2p):** colorless solid (53.1 mg, 91%); mp 146.0–147.0 °C (hexane/EtOAc);  $R_f$  0.50 (hexane/EtOAc 2:1);  $^1\text{H NMR}$  (400 MHz,  $\text{CDCl}_3$ )  $\delta$  8.05–7.95 (m, 2H, Ar), 7.56–7.50 (m, 2H, Ar), 7.45–7.38 (m, 3H, Ar), 7.18 (t,  $J = 8.5$  Hz, 2H, Ar), 4.52 (s, 2H,  $\text{CH}_2$ ), 4.36 (s, 2H,  $\text{CH}_2$ );  $^{13}\text{C NMR}$  (100 MHz,  $\text{CDCl}_3$ )  $\delta$  188.1, 166.8 (d,  $J_F = 258.1$  Hz, CF), 132.5 (d,  $J_F = 3.0$  Hz, C), 132.2 (d,  $J_F = 9.8$  Hz, CH), 131.2, 129.5, 129.3, 127.8, 116.4 (d,  $J_F = 22.2$  Hz, CH), 60.0, 57.0;  $^{19}\text{F NMR}$  (376 MHz,  $\text{CDCl}_3$ )  $\delta$  -101.91; **HRMS** (ESI):  $m/z$   $[\text{M} + \text{Na}]^+$  calcd. for  $\text{C}_{15}\text{H}_{13}\text{FNaO}_3\text{S}^+$ : 315.0462; found: 315.0464.

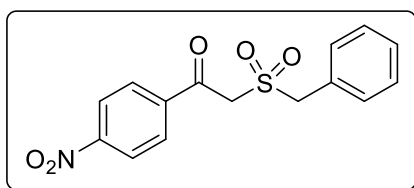

**2-(Benzylsulfonyl)-1-(4-nitrophenyl)ethan-1-one (2q):** colorless solid (61.9 mg, 97%); mp 179.0–181.0 °C (hexane/EtOAc);  $R_f$  0.35 (hexane/EtOAc 2:1);  $^1\text{H NMR}$  (400 MHz,  $\text{DMSO}-d_6$ )  $\delta$  8.37 (d,  $J = 8.7$  Hz, 2H, Ar), 8.26 (d,  $J = 8.5$  Hz, 2H, Ar), 7.42 (br. s, 5H, Ar), 5.12 (s, 2H,  $\text{CH}_2$ ), 4.69 (s, 2H,  $\text{CH}_2$ );  $^{13}\text{C NMR}$  (100 MHz,  $\text{DMSO}-d_6$ )  $\delta$  189.2, 150.4, 140.4, 131.3, 130.5, 128.7, 128.6, 127.7, 123.8, 59.4, 59.2; **HRMS** (ESI):  $m/z$   $[\text{M} + \text{Na}]^+$  calcd. for  $\text{C}_{15}\text{H}_{13}\text{NNaO}_5\text{S}^+$ : 342.0407; found: 342.0409.

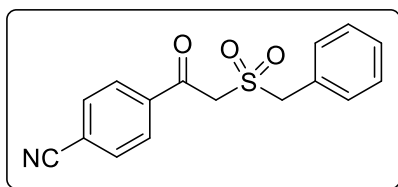

**4-(2-(Benzylsulfonyl)acetyl)benzonitrile (2r):** colorless solid (50.8 mg, 85%); mp 141.0–143.0 °C (hexane/EtOAc);  $R_f$  0.30 (hexane/EtOAc 2:1);  $^1\text{H NMR}$  (400 MHz,  $\text{CDCl}_3$ )  $\delta$  8.06 (d,  $J = 8.4$  Hz, 2H, Ar), 7.81 (d,  $J = 8.4$  Hz, 2H, Ar), 7.57–7.50 (m, 2H, Ar), 7.46–7.39 (m, 3H, Ar), 4.51 (s, 2H,  $\text{CH}_2$ ), 4.40 (s, 2H,  $\text{CH}_2$ );  $^{13}\text{C NMR}$  (100 MHz,  $\text{CDCl}_3$ )  $\delta$  188.7, 138.8, 132.9, 131.2, 129.7, 129.6, 129.4, 127.5, 117.9, 117.6, 60.1, 57.1; **HRMS** (ESI):  $m/z$   $[\text{M} + \text{Na}]^+$  calcd. for  $\text{C}_{16}\text{H}_{13}\text{NNaO}_3\text{S}^+$ : 322.0508; found: 322.0505.

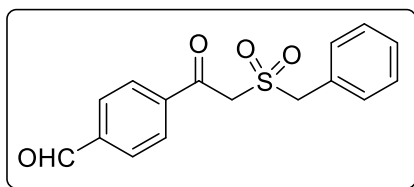

**4-(2-(Benzylsulfonyl)acetyl)benzaldehyde (2s):** colorless solid (58.0 mg, 96%); mp 129.0–131.0 °C (hexane/EtOAc);  $R_f$  0.25 (hexane/EtOAc 2:1);  $R_f$  0.25 (hexane/EtOAc 2:1);  $^1\text{H NMR}$  (400 MHz,  $\text{CDCl}_3$ )  $\delta$  10.12 (s, 1H, CH), 8.12 (d,  $J = 8.3$  Hz, 2H, Ar), 8.01 (d,  $J = 8.3$  Hz, 2H, Ar), 7.57–7.50 (m, 2H, Ar), 7.44–7.39 (m, 3H, Ar), 4.53 (s, 2H,  $\text{CH}_2$ ), 4.43 (s, 2H,  $\text{CH}_2$ );  $^{13}\text{C NMR}$  (100 MHz,  $\text{CDCl}_3$ )  $\delta$  191.3, 189.3, 140.0, 131.2, 130.1, 129.8, 129.6, 129.3 ( $\times 2$ ), 127.7, 60.0, 57.2; **HRMS** (ESI):  $m/z$   $[\text{M} + \text{Na}]^+$  calcd. for  $\text{C}_{16}\text{H}_{14}\text{NaO}_4\text{S}^+$ : 325.0505; found: 325.0503.

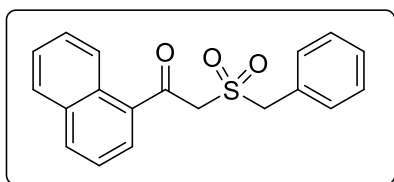

**2-(Benzylsulfonyl)-1-(naphthalen-1-yl)ethan-1-one (2t):**

colorless solid (54.4 mg, 84%); mp 106.0–108.0 °C (hexane/EtOAc);  $R_f$  0.45 (hexane/EtOAc 2:1);  $^1\text{H NMR}$  (400 MHz,  $\text{CDCl}_3$ )  $\delta$  8.78 (d,  $J = 8.4$  Hz, 1H, Ar), 8.08 (d,  $J = 8.2$  Hz, 1H, Ar), 7.96 (d,  $J = 7.3$  Hz, 1H, Ar), 7.91 (d,  $J = 8.1$  Hz, 1H, Ar), 7.71–7.65 (m, 1H, Ar), 7.63–7.57 (m, 3H, Ar), 7.53 (t,  $J = 7.8$  Hz, 1H, Ar), 7.46–7.40 (m, 3H, Ar), 4.64 (s, 2H,  $\text{CH}_2$ ), 4.50 (s, 2H,  $\text{CH}_2$ );  $^{13}\text{C NMR}$  (100 MHz,  $\text{CDCl}_3$ )  $\delta$  192.2, 135.0, 134.1, 133.8, 131.2, 130.7, 130.4, 129.4, 129.3, 129.1, 128.9, 128.1, 127.1, 125.6, 124.5, 60.1, 59.6; **HRMS** (ESI):  $m/z$   $[\text{M} + \text{Na}]^+$  calcd. for  $\text{C}_{19}\text{H}_{16}\text{NaO}_3\text{S}^+$ : 347.0712; found: 347.0714.

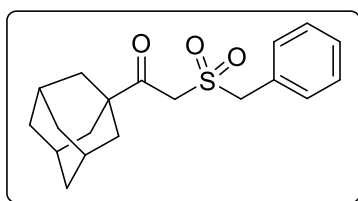

**1-(Adamantan-1-yl)-2-(benzylsulfonyl)ethan-1-one (2u):**

colorless solid (59.8 mg, 90%); mp 122.0–124.0 °C (hexane/EtOAc);  $R_f$  0.35 (hexane/EtOAc 4:1);  $^1\text{H NMR}$  (400 MHz,  $\text{CDCl}_3$ )  $\delta$  7.50–7.44 (m, 2H, Ar), 7.42–7.36 (m, 3H, Ar), 4.52 (s, 2H,  $\text{CH}_2$ ), 3.88 (s, 2H,  $\text{CH}_2$ ), 2.07 (br. s, 3H, CH), 1.83–1.63 (m, 12H,  $\text{CH}_2$ );  $^{13}\text{C NMR}$  (100 MHz,  $\text{CDCl}_3$ )  $\delta$  204.7, 131.0, 129.3, 129.1, 128.4, 60.1, 54.3, 47.8, 37.4, 36.3, 27.7; **HRMS** (ESI):  $m/z$   $[\text{M} + \text{Na}]^+$  calcd. for  $\text{C}_{19}\text{H}_{24}\text{NaO}_3\text{S}^+$ : 355.1338; found: 355.1334.

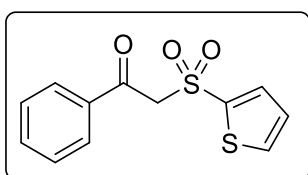

**1-Phenyl-2-(thiophen-2-ylsulfonyl)ethan-1-one<sup>11</sup> (2v):**

yellow oil (47.4 mg, 89%);  $R_f$  0.35 (hexane/EtOAc 2:1);  $^1\text{H NMR}$  (400 MHz,  $\text{CDCl}_3$ )  $\delta$  7.95 (d,  $J = 8.3$  Hz, 2H, Ar), 7.74 (dd,  $J = 5.0, 1.5$  Hz, 1H, Ar), 7.69 (dd,  $J = 3.9, 1.4$  Hz, 1H, Ar), 7.63 (t,  $J = 7.4$  Hz, 1H, Ar), 7.49 (t,  $J = 7.8$  Hz, 2H, Ar), 7.13 (dd,  $J = 5.0, 3.8$  Hz, 1H, Ar), 4.82 (s, 2H,  $\text{CH}_2$ );  $^{13}\text{C NMR}$  (100 MHz,  $\text{CDCl}_3$ )  $\delta$  187.9, 139.6, 135.8, 135.6, 135.1, 134.6, 129.4, 129.1, 128.1, 64.5; **HRMS** (ESI):  $m/z$   $[\text{M} + \text{Na}]^+$  calcd. for  $\text{C}_{12}\text{H}_{10}\text{NaO}_3\text{S}_2^+$ : 288.9964; found: 288.9966.

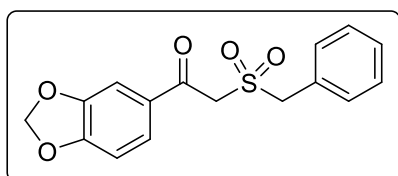

**1-(Benzo[*d*][1,3]dioxol-5-yl)-2-(benzylsulfonyl)ethan-1-one (2w):**

colorless solid (57.9 mg, 91%); mp 96.0–98.0 °C (hexane/EtOAc);  $R_f$  0.35 (hexane/EtOAc 2:1);  $^1\text{H NMR}$  (400 MHz,  $\text{CDCl}_3$ )  $\delta$  7.57–7.50 (m, 3H, Ar), 7.45 (d,  $J = 1.6$  Hz, 1H, Ar), 7.42–7.37 (m, 3H, Ar), 6.88 (d,  $J = 8.2$  Hz, 1H, Ar), 6.08 (s, 2H,  $\text{CH}_2$ ), 4.52 (s, 2H,  $\text{CH}_2$ ), 4.31 (s, 2H,  $\text{CH}_2$ );  $^{13}\text{C NMR}$  (100 MHz,  $\text{CDCl}_3$ )  $\delta$  187.4, 153.4, 148.8, 131.3, 130.9, 129.4, 129.2, 128.0, 126.7, 108.5, 108.4, 102.4, 59.9, 56.9; **HRMS** (ESI):  $m/z$   $[\text{M} + \text{Na}]^+$  calcd. for  $\text{C}_{16}\text{H}_{14}\text{NaO}_5\text{S}^+$ : 341.0454; found: 341.0451.

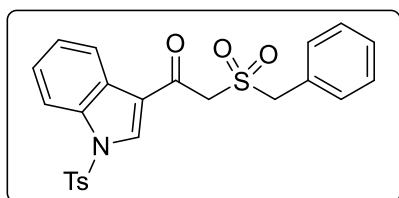

**2-(Benzylsulfonyl)-1-(1-tosyl-1*H*-indol-3-yl)ethan-1-one**

**(2x)**: yellowish solid (77.5 mg, 83%); mp 216.0–218.0 °C (hexane/EtOAc);  $R_f$  0.40 (hexane/EtOAc 2:1);  $^1\text{H NMR}$  (400 MHz,  $\text{CDCl}_3$ )  $\delta$  8.36 (s, 1H, Ar), 8.36–8.32 (m, 1H, Ar), 7.94 (dd,  $J = 6.7, 2.0$  Hz, 1H, Ar), 7.86 (d,  $J = 8.4$  Hz, 2H, Ar), 7.58 (dd,  $J = 6.5, 2.8$  Hz, 2H, Ar), 7.45–7.36 (m, 5H, Ar), 7.29 (d,  $J = 8.2$  Hz, 2H, Ar), 4.52 (s, 2H,  $\text{CH}_2$ ), 4.32 (s, 2H,  $\text{CH}_2$ ), 2.36 (s, 3H, Me);  $^{13}\text{C NMR}$  (100 MHz,  $\text{CDCl}_3$ )  $\delta$  183.9, 146.4, 135.2, 135.0, 134.2, 131.4, 130.5, 129.4, 129.2, 127.8, 127.6, 127.3, 126.4, 125.4, 123.1, 121.0, 113.4, 59.9, 58.9, 21.8; **HRMS** (ESI):  $m/z$   $[\text{M} + \text{Na}]^+$  calcd. for  $\text{C}_{24}\text{H}_{21}\text{NNaO}_5\text{S}_2^+$ : 490.0753; found: 490.0748.

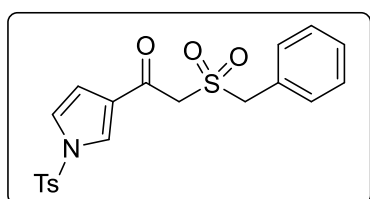

**2-(Benzylsulfonyl)-1-(1-tosyl-1*H*-pyrrol-3-yl)ethan-1-one**

**(2y)**: colorless oil (78.4 mg, 94%);  $R_f$  0.40 (hexane/EtOAc 2:1);  $^1\text{H NMR}$  (400 MHz,  $\text{CDCl}_3$ )  $\delta$  7.86–7.76 (m, 3H, Ar), 7.55–7.47 (m, 2H, Ar), 7.41–7.37 (m, 3H, Ar), 7.35 (d,  $J = 8.1$  Hz, 2H, Ar), 7.15 (dd,  $J = 3.3, 2.1$  Hz, 1H, Ar), 6.71 (dd,  $J = 3.3, 1.7$  Hz, 1H, Ar), 4.48 (s, 2H,  $\text{CH}_2$ ), 4.14 (s, 2H,  $\text{CH}_2$ ), 2.43 (s, 3H, Me);  $^{13}\text{C NMR}$  (100 MHz,  $\text{CDCl}_3$ )  $\delta$  183.7, 146.5, 134.7, 131.3, 130.6, 129.4, 129.2, 128.4, 127.8, 127.6, 126.8, 122.3, 112.6, 59.9, 58.3, 21.9; **HRMS** (ESI):  $m/z$   $[\text{M} + \text{Na}]^+$  calcd. for  $\text{C}_{20}\text{H}_{19}\text{NNaO}_5\text{S}_2^+$ : 440.0597; found: 440.0594.

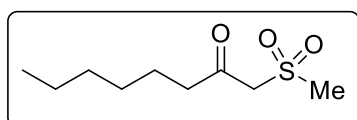

**1-(Methylsulfonyl)octan-2-one<sup>16</sup> (2z)**: colorless solid (40.0

mg, 97%); mp 43.0–45.0 °C (hexane/EtOAc);  $R_f$  0.35 (hexane/EtOAc 2:1);  $^1\text{H NMR}$  (400 MHz,  $\text{CDCl}_3$ )  $\delta$  4.02 (s, 2H,  $\text{CH}_2$ ), 3.03 (s, 3H, Me), 2.68 (t,  $J = 7.3$  Hz, 2H, CH), 1.59 (p,  $J = 7.3$  Hz, 2H, CH), 1.33–1.23 (m, 6H, CH), 0.90–0.82 (m, 3H, Me);  $^{13}\text{C NMR}$  (100 MHz,  $\text{CDCl}_3$ )  $\delta$  199.9, 64.6, 45.0, 41.6, 31.6, 28.6, 23.0, 22.5, 14.1; **HRMS** (ESI):  $m/z$   $[\text{M} + \text{Na}]^+$  calcd. for  $\text{C}_9\text{H}_{18}\text{NaO}_3\text{S}^+$ : 229.0869; found: 229.0866.

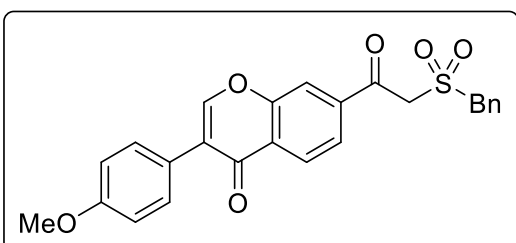

**7-(2-(Benzylsulfonyl)acetyl)-3-(4-methoxyphenyl)-**

**4*H*-chromen-4-one (2aa)**: colorless solid (73.6 mg,

82%); mp 204.5–206.5 °C (benzene/EtOAc);  $R_f$  0.30 (benzene/EtOAc 5:1);  $^1\text{H NMR}$  (400 MHz,  $\text{DMSO}-d_6$ )  $\delta$  8.64 (s, 1H, Ar), 8.38 (s, 1H, Ar), 8.27 (d,  $J = 8.3$  Hz, 1H, Ar), 8.04 (d,  $J = 6.9$  Hz, 1H, Ar), 7.57 (d,  $J = 8.8$  Hz, 2H, Ar), 7.45–7.41 (m, 5H, Ar), 7.02 (d,  $J = 8.8$  Hz, 2H, Ar), 5.17 (s, 2H,  $\text{CH}_2$ ), 4.71 (s, 2H,  $\text{CH}_2$ ),



3.80 (s, 3H, Me);  $^{13}\text{C}$  NMR (100 MHz, DMSO- $d_6$ )  $\delta$  189.2, 174.9, 159.2, 155.3, 155.0, 139.8, 131.3, 130.1, 128.7, 128.6, 127.7, 126.9, 126.2, 124.4, 124.2, 123.6, 120.4, 113.7, 59.5, 59.1, 55.2; HRMS (ESI):  $m/z$   $[\text{M} + \text{Na}]^+$  calcd. for  $\text{C}_{25}\text{H}_{20}\text{NaO}_6\text{S}^+$ : 471.0873; found: 471.0856.

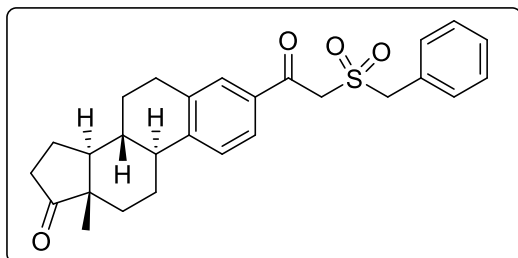

**(8R,9S,13S,14S)-3-(2-(Benzylsulfonyl)acetyl)-13-methyl-6,7,8,9,11,12,13,14,15,16-decahydro-17H-cyclopenta[*a*]phenanthren-17-one (2ab):** colorless solid (77.4 mg, 86%); colorless oil (77.4 mg, 86%);  $R_f$  0.25 (hexane/EtOAc 2:1);  $^1\text{H}$  NMR

(400 MHz,  $\text{CDCl}_3$ )  $\delta$  7.76–7.67 (m, 2H, Ar), 7.54 (dd,  $J = 6.4, 2.8$  Hz, 2H, Ar), 7.46–7.37 (m, 4H, Ar), 4.53 (s, 2H,  $\text{CH}_2$ ), 4.36 (s, 2H,  $\text{CH}_2$ ), 3.05–2.87 (m, 2H, CH), 2.52 (dd,  $J = 18.7, 8.7$  Hz, 1H, CH), 2.48–2.30 (m, 2H, CH), 2.21–2.03 (m, 3H, CH), 2.03–1.96 (m, 1H, CH), 1.68–1.44 (m, 6H, CH), 0.92 (s, 3H, Me);  $^{13}\text{C}$  NMR (100 MHz,  $\text{CDCl}_3$ )  $\delta$  220.4, 189.4, 147.6, 137.7, 133.7, 131.2, 129.9, 129.3, 129.2, 128.0, 126.7, 126.2, 59.9, 56.7, 50.6, 48.0, 44.9, 37.8, 35.9, 31.6, 29.4, 26.3, 25.6, 21.7, 13.9; HRMS (ESI):  $m/z$   $[\text{M} + \text{Na}]^+$  calcd. for  $\text{C}_{27}\text{H}_{30}\text{NaO}_4\text{S}^+$ : 473.1757; found: 473.1747.

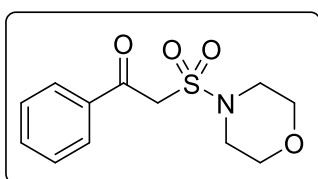

**2-(Morpholinosulfonyl)-1-phenylethan-1-one<sup>17</sup> (2ac):** colorless solid (45.8 mg, 85%); mp 130.5–132.5 °C (hexane/EtOAc);  $R_f$  0.50 (hexane/EtOAc 1:1);  $^1\text{H}$  NMR (400 MHz,  $\text{CDCl}_3$ )  $\delta$  8.03 (d,  $J = 7.3$  Hz, 2H, Ar), 7.65 (t,  $J = 7.4$  Hz, 1H, Ar), 7.52 (t,  $J = 7.8$  Hz, 2H, Ar), 4.57 (s, 2H,  $\text{CH}_2$ ), 3.73–3.71 (m, 4H,  $\text{CH}_2$ ), 3.37–3.35 (m, 4H,  $\text{CH}_2$ );  $^{13}\text{C}$  NMR (100 MHz,  $\text{CDCl}_3$ )  $\delta$  189.2, 135.9, 134.6, 129.5, 129.1, 66.7, 57.5, 46.3; HRMS (ESI):  $m/z$   $[\text{M} + \text{Na}]^+$  calcd. for  $\text{C}_{12}\text{H}_{15}\text{NNaO}_4\text{S}^+$ : 292.0614; found: 292.0622.

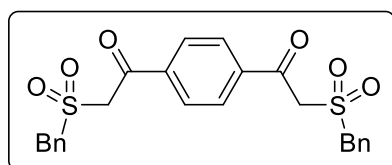

**1,1'-(1,4-Phenylene)bis(2-(benzylsulfonyl)ethan-1-one) (2ad):** colorless solid (88.5 mg, 94%); mp 227.0–229.0 °C (DCM);  $R_f$  0.40 (benzene/EtOAc 3:1);  $^1\text{H}$  NMR (400 MHz, DMSO- $d_6$ )  $\delta$  8.18 (s, 4H, Ar), 7.44–7.39 (m, 10H, Ar), 5.10 (s, 4H,  $\text{CH}_2$ ), 4.69 (s, 4H,  $\text{CH}_2$ );  $^{13}\text{C}$  NMR (100 MHz, DMSO- $d_6$ )  $\delta$  189.7, 139.6, 131.3, 129.4, 128.7, 128.6, 127.8, 59.4, 59.0; HRMS (ESI):  $m/z$   $[\text{M} + \text{Na}]^+$  calcd. for  $\text{C}_{24}\text{H}_{22}\text{NaO}_6\text{S}_2^+$ : 493.0750; found: 493.0758.

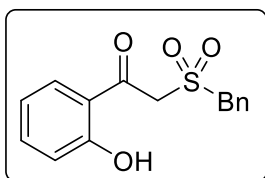

**2-(Benzylsulfonyl)-1-(2-hydroxyphenyl)ethan-1-one (2ae):** colorless solid (48.1 mg, 93%); mp 103.0–105.0 °C (hexane/EtOAc);  $R_f$  0.30 (hexane/EtOAc 2:1);  $^1\text{H NMR}$  (400 MHz,  $\text{CDCl}_3$ )  $\delta$  11.74 (s, 1H, OH), 7.65 (dd,  $J = 8.1, 1.2$  Hz, 1H), 7.58–7.52 (m, 3H, Ar), 7.43–7.40 (m, 3H, Ar), 7.04 (d,  $J = 8.3$  Hz, 1H, Ar), 6.95 (t,  $J = 7.6$  Hz, 1H, Ar), 4.54 (s, 2H,  $\text{CH}_2$ ), 4.40 (s, 2H,  $\text{CH}_2$ );  $^{13}\text{C NMR}$  (100 MHz,  $\text{CDCl}_3$ )  $\delta$  194.6, 163.6, 138.4, 131.3, 131.2, 129.6, 129.3, 127.7, 119.8, 119.5, 119.1, 60.4, 56.8; **HRMS** (ESI):  $m/z$   $[\text{M} + \text{Na}]^+$  calcd. for  $\text{C}_{15}\text{H}_{14}\text{NNaO}_4\text{S}^+$ : 313.0505; found: 313.0507.

#### 4.2. One-pot Synthesis of Quinoline 4

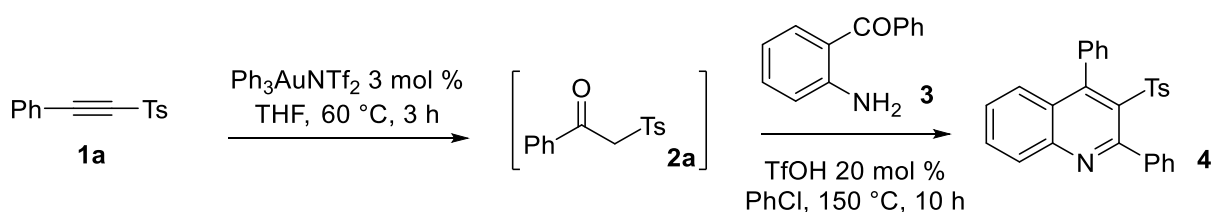

$\text{Ph}_3\text{PAuNTf}_2$  (4.4 mg, 6.0  $\mu\text{mol}$ , 3 mol %) was added to the solution of 1-methyl-4-((phenylethynyl)sulfonyl)benzene (**1a**, 51.3 mg, 0.2 mmol) and water (36  $\mu\text{L}$ , 2.0 mmol, 10 equiv) in tetrahydrofuran (1.0 mL). The resulting mixture was stirred at 60 °C for 3 h. After completion, all volatile components were removed in vacuum. Then chlorobenzene (1.0 mL), (2-aminophenyl)(phenyl)methanone (**3**, 59.2 mg, 0.3 mmol, 1.5 equiv), and triflic acid (6.0 mg, 40  $\mu\text{mol}$ , 20 mol %) were added in this sequence. The resulting mixture was stirred at 150 °C for 10 h. Finally, all volatile components were removed in vacuum and the residue was purified by silica gel chromatography eluting with hexane/EtOAc to afford quinoline **4**.

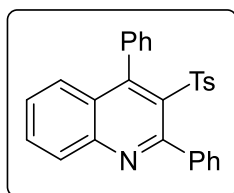

**2,4-Diphenyl-3-tosylquinoline<sup>18</sup> (4):** colorless solid (82.7 mg, 95%); mp 181.0–182.0 °C (hexane/EtOAc);  $R_f$  0.60 (hexane/EtOAc 2:1);  $^1\text{H NMR}$  (400 MHz,  $\text{CDCl}_3$ )  $\delta$  8.18 (d,  $J = 8.4$  Hz, 1H, Ar), 7.85–7.77 (m, 1H, Ar), 7.59–7.53 (m, 2H, Ar), 7.51–7.34 (m, 8H, Ar), 7.27 (d,  $J = 7.1$  Hz, 2H, Ar), 6.97 (d,  $J = 8.3$  Hz, 2H, Ar), 6.88 (d,  $J = 8.2$  Hz, 2H, Ar), 2.30 (s, 3H, Me);  $^{13}\text{C NMR}$  (100 MHz,  $\text{CDCl}_3$ )  $\delta$  158.0, 151.4, 147.7, 143.0, 141.1, 139.3, 135.1, 133.5, 132.2, 130.3, 129.7, 129.6, 129.0, 128.6, 128.6, 127.9, 127.8, 127.7, 127.5, 127.3, 126.8, 21.6; **HRMS** (ESI):  $m/z$   $[\text{M} + \text{Na}]^+$  calcd. for  $\text{C}_{28}\text{H}_{21}\text{NNaO}_2\text{S}^+$ : 458.1185; found: 458.1177.

### 4.3. One-pot Synthesis of Benzimidazole 6

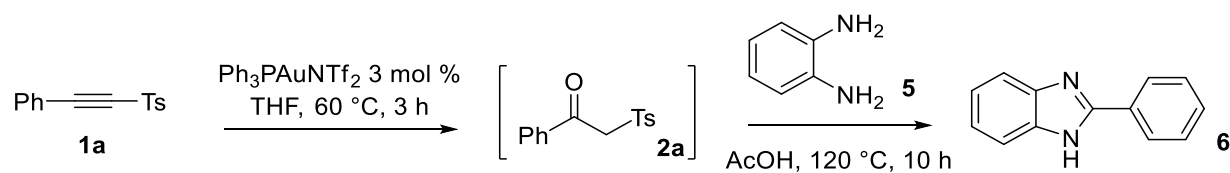

$\text{Ph}_3\text{PAuNTf}_2$  (4.4 mg, 6.0  $\mu\text{mol}$ , 3 mol %) was added to the solution of 1-methyl-4-((phenylethynyl)sulfonyl)benzene (**1a**, 51.3 mg, 0.2 mmol) and water (36  $\mu\text{L}$ , 2.0 mmol, 10 equiv) in tetrahydrofuran (1.0 mL). The resulting mixture was stirred at 60  $^\circ\text{C}$  for 3 h. After completion, all volatile components were removed in vacuum. Then acetic acid (1.0 mL) and *o*-phenylenediamine (**5**, 38.2 mg, 0.2 mmol, 1.0 equiv) were added in this sequence. The resulting mixture was stirred at 120  $^\circ\text{C}$  for 10 h. Finally, all volatile components were removed in vacuum and the residue was purified by silica gel chromatography eluting with hexane/EtOAc to afford benzimidazole **6**.

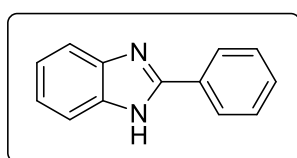

**2-Phenyl-1H-benzo[d]imidazole**<sup>19</sup> (**6**): colorless solid (35.3 mg, 91%); mp 289.0–291.0  $^\circ\text{C}$  (hexane/EtOAc);  $R_f$  0.30 (hexane/EtOAc 2:1);  $^1\text{H NMR}$  (400 MHz,  $\text{DMSO}-d_6$ )  $\delta$  12.91 (br. s, 1H, NH), 8.23–8.15 (m, 2H, Ar), 7.69–7.44 (m, 5H, Ar), 7.21 (dq,  $J = 6.9, 3.8$  Hz, 2H, Ar);  $^{13}\text{C NMR}$  (100 MHz,  $\text{DMSO}-d_6$ )  $\delta$  151.2, 130.2, 129.8, 128.9, 126.4, 122.1 (two signals are merged with others); **HRMS** (ESI):  $m/z$   $[\text{M} + \text{H}]^+$  calcd. for  $\text{C}_{13}\text{H}_{11}\text{N}_2^+$ : 195.0917; found: 195.0921.

### 4.4. One-pot Synthesis of Triazole 8

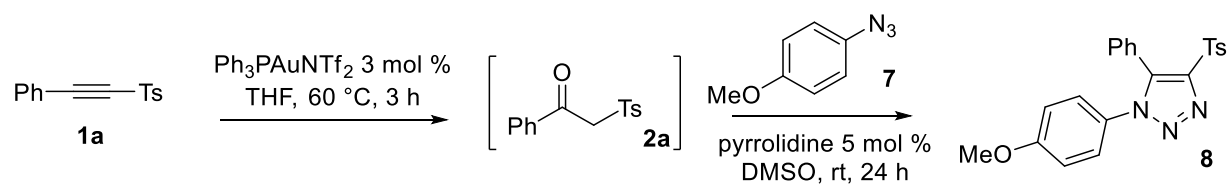

$\text{Ph}_3\text{PAuNTf}_2$  (4.4 mg, 6.0  $\mu\text{mol}$ , 3 mol %) was added to the solution of 1-methyl-4-((phenylethynyl)sulfonyl)benzene (**1a**, 51.3 mg, 0.2 mmol) and water (36  $\mu\text{L}$ , 2.0 mmol, 10 equiv) in tetrahydrofuran (1.0 mL). The resulting mixture was stirred at 60  $^\circ\text{C}$  for 3 h. After completion, all volatile components were removed in vacuum. Then DMSO (1.0 mL), 1-azido-4-methoxybenzene (**7**, 32.8 mg, 0.22 mmol, 1.1 equiv) and pyrrolidine (0.7 mg, 10  $\mu\text{mol}$ , 5 mol %) were added in this sequence. The resulting mixture was stirred at room temperature for 24 h. Finally, all volatile components were removed in vacuum and the

residue was purified by silica gel chromatography eluting with hexane/EtOAc to afford triazole **8**.

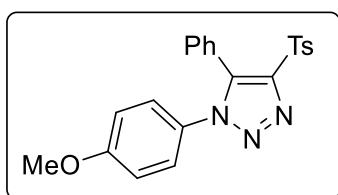

**1-(4-Methoxyphenyl)-5-phenyl-4-tosyl-1H-1,2,3-triazole<sup>20</sup>**

(**8**): colorless solid (78.6 mg, 97%); mp 198.0–199.0 °C (hexane/EtOAc);  $R_f$  0.35 (hexane/EtOAc 2:1);  $^1\text{H NMR}$  (400 MHz,  $\text{CDCl}_3$ )  $\delta$  7.76 (d,  $J = 8.2$  Hz, 2H, Ar), 7.45 (t,  $J = 7.4$  Hz, 1H, Ar), 7.38 (t,  $J = 7.5$  Hz, 2H, Ar), 7.26–7.24 (m, 4H, Ar), 7.12 (d,  $J = 9.0$  Hz, 2H, Ar), 6.83 (d,  $J = 9.0$  Hz, 2H, Ar), 3.78 (s, 3H, Me), 2.39 (s, 3H, Me);  $^{13}\text{C NMR}$  (100 MHz,  $\text{CDCl}_3$ )  $\delta$  160.5, 146.0, 144.9, 138.6, 137.9, 130.6, 130.5, 129.8, 128.6, 128.4, 128.3, 126.6, 124.6, 114.6, 55.7, 21.7; **HRMS** (ESI):  $m/z$   $[\text{M} + \text{Na}]^+$  calcd. for  $\text{C}_{22}\text{H}_{19}\text{N}_3\text{NaO}_3\text{S}^+$ : 428.1039; found: 428.1034.

**4.5. One-pot Propargylation of 2a. Synthesis of Furane 11 and Diketone 12**

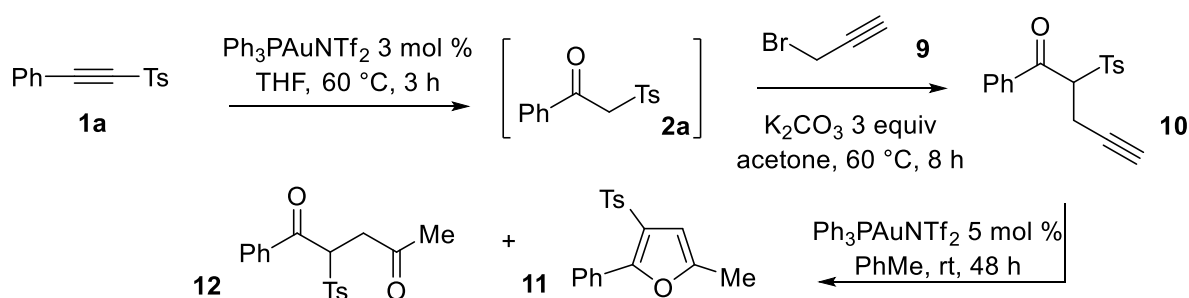

$\text{Ph}_3\text{PAuNTf}_2$  (4.4 mg, 6.0  $\mu\text{mol}$ , 3 mol %) was added to the solution of 1-methyl-4-((phenylethynyl)sulfonyl)benzene (**1a**, 51.3 mg, 0.2 mmol) and water (36  $\mu\text{L}$ , 2.0 mmol, 10 equiv) in tetrahydrofuran (1.0 mL). The resulting mixture was stirred at 60 °C for 3 h. After completion, all volatile components were removed in vacuum. Then acetone (1.0 mL), propargyl bromide (**9**, 80% wt. solution in toluene, 32.7 mg, 0.22 mmol, 1.1 equiv), and  $\text{K}_2\text{CO}_3$  (82.8 mg, 0.6 mmol, 3 equiv) were added in this sequence. The resulting mixture was stirred at 60 °C for 8 h. Finally, all volatile components were removed in vacuum and the residue was purified by silica gel chromatography eluting with hexane/EtOAc to afford **10**.

$\text{Ph}_3\text{PAuNTf}_2$  (3.7 mg, 5.0  $\mu\text{mol}$ , 5 mol %) was added to the solution of **10** (31.2 mg, 0.1 mmol) in dry toluene (1.0 mL). The resulting mixture was stirred at room temperature for 48 h. After completion, all the solvent was removed in vacuum and the residue was purified by silica gel chromatography eluting with hexane/EtOAc to afford **11** and **12**.

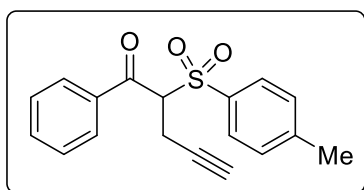

**1-Phenyl-2-tosylpent-4-yn-1-one**<sup>21</sup> (**10**): colorless solid (53.0 mg, 85%); mp 110.0–112.0 °C (hexane/EtOAc);  $R_f$  0.30 (hexane/EtOAc 4:1);  $^1\text{H NMR}$  (400 MHz,  $\text{CDCl}_3$ )  $\delta$  7.96 (d,  $J = 7.3$  Hz, 2H, Ar), 7.66–7.56 (m, 3H, Ar), 7.47 (t,  $J = 7.8$  Hz, 2H, Ar), 7.30 (d,  $J = 8.1$  Hz, 2H, Ar), 5.26 (dd,  $J = 8.6, 6.1$  Hz, 1H, CH), 2.97 (t,  $J = 2.7$  Hz, 1H, CH), 2.95 (d,  $J = 2.7$  Hz, 1H, CH), 2.42 (s, 3H, Me), 1.89 (t,  $J = 2.7$  Hz, 1H, CH);  $^{13}\text{C NMR}$  (100 MHz,  $\text{CDCl}_3$ )  $\delta$  191.0, 146.0, 137.0, 134.2, 133.0, 129.9, 129.8, 129.3, 128.9, 78.4, 71.3, 68.4, 21.8, 18.4; **HRMS** (ESI):  $m/z$   $[\text{M} + \text{Na}]^+$  calcd. for  $\text{C}_{18}\text{H}_{16}\text{NaO}_3\text{S}^+$ : 335.0712; found: 335.0707.

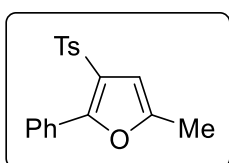

**5-Methyl-2-phenyl-3-tosylfuran**<sup>21</sup> (**11**): yellowish oil (40.6 mg, 65%);  $R_f$  0.35 (hexane/EtOAc 4:1);  $^1\text{H NMR}$  (400 MHz,  $\text{CDCl}_3$ )  $\delta$  7.85–7.83 (m, 2H, Ar), 7.68 (d,  $J = 8.4$  Hz, 2H, Ar), 7.43–7.38 (m, 3H, Ar), 7.20 (d,  $J = 8.0$  Hz, 2H, Ar), 6.42 (d,  $J = 1.0$  Hz, 1H, Ar), 2.35 (s, 3H, Me), 1.89 (d,  $J = 0.8$  Hz, 3H, Me);  $^{13}\text{C NMR}$  (100 MHz,  $\text{CDCl}_3$ )  $\delta$  153.5, 151.7, 144.1, 139.4, 129.7, 129.7, 128.7, 128.6, 128.3, 127.2, 124.6, 108.5, 21.6, 13.5; **HRMS** (ESI):  $m/z$   $[\text{M} + \text{Na}]^+$  calcd. for  $\text{C}_{18}\text{H}_{16}\text{NaO}_3\text{S}^+$ : 335.0712; found: 335.0709.

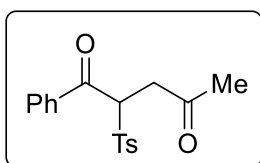

**1-Phenyl-2-tosylpentane-1,4-dione**<sup>21</sup> (**12**): yellowish oil (19.8 mg, 30%);  $R_f$  0.35 (hexane/EtOAc 2:1);  $^1\text{H NMR}$  (400 MHz,  $\text{CDCl}_3$ )  $\delta$  7.91 (d,  $J = 7.3$  Hz, 2H, Ar), 7.58–7.54 (m, 3H, Ar), 7.41 (t,  $J = 7.8$  Hz, 2H, Ar), 7.24 (d,  $J = 8.1$  Hz, 2H, Ar), 5.51 (dd,  $J = 10.8, 3.0$  Hz, 1H, CH), 3.49 (dd,  $J = 18.1, 10.8$  Hz, 1H, CH), 3.29 (dd,  $J = 18.1, 3.0$  Hz, 1H, CH), 2.40 (s, 3H, Me), 2.16 (s, 3H, Me);  $^{13}\text{C NMR}$  (100 MHz,  $\text{CDCl}_3$ )  $\delta$  203.9, 191.8, 145.7, 136.8, 133.8, 133.8, 129.8, 129.5, 129.3, 128.6, 65.8, 42.0, 29.7, 21.8; **HRMS** (ESI):  $m/z$   $[\text{M} + \text{Na}]^+$  calcd. for  $\text{C}_{18}\text{H}_{18}\text{Na}_3\text{O}_4\text{S}^+$ : 353.0818; found: 353.0824.

## 5 References

- 1 A. Y. Dubovtsev, V. V Zvereva, N. V Shcherbakov, D. V Dar'in, A. S. Novikov and V. Y. Kukushkin, Acid-catalyzed [2 + 2 + 2] cycloaddition of two cyanamides and one ynamide: highly regioselective synthesis of 2{,}4{,}6-triaminopyrimidines, *Org. Biomol. Chem.*, 2021, **19**, 4577–4584.
- 2 Z. Wu, Y. Xu, H. Zhang, X. Wu and C. Zhu, Radical-mediated sulfonyl alkynylation{,} allylation{,} and cyanation of propellane, *Chem. Commun.*, 2021, **57**, 6066–6069.
- 3 X. Zeng, S. Liu, G. B. Hammond and B. Xu, Divergent Regio- and Stereoselective Gold-catalyzed Synthesis of  $\alpha$ -Fluorosulfones and  $\beta$ -Fluorovinylsulfones from Alkynylsulfones, *Chem. Eur. J.*, 2017, **23**, 11977–11981.
- 4 W. Song, N. Zheng, M. Li, K. Dong, J. Li, K. Ullah and Y. Zheng, Regiodivergent Rhodium(I)-Catalyzed Azide–Alkyne Cycloaddition (RhAAC) To Access Either Fully Substituted Sulfonyl-1,2,3-triazoles under Mild Conditions, *Org. Lett.*, 2018, **20**, 6705–6709.
- 5 D. Qi, W. Dong, Z. Peng, Y. Zhang and D. An, Mukaiyama reagent-promoted metal-free preparation of alkynyl sulfones and phosphonates under mild conditions, *Tetrahedron*, 2019, **75**, 130427.
- 6 S. Biswas, B. F. Van Steijvoort, M. Waeterschoot, N. R. Bheemireddy, G. Evano and B. U. W. Maes, Expedient Synthesis of Bridged Bicyclic Nitrogen Scaffolds via Orthogonal Tandem Catalysis, *Angew. Chem. Int. Ed.*, 2021, **60**, 21988–21996.
- 7 L. Capaldo and D. Ravelli, Decatungstate as Direct Hydrogen Atom Transfer Photocatalyst for SOMOphilic Alkynylation, *Org. Lett.*, 2021, **23**, 2243–2247.
- 8 W. Xu, Y. Chen, A. Wang and Y. Liu, Benzofurazan N-Oxides as Mild Reagents for the Generation of  $\alpha$ -Imino Gold Carbenes: Synthesis of Functionalized 7-Nitroindoles, *Org. Lett.*, 2019, **21**, 7613–7618.
- 9 M. Chen, N. Sun, H. Chen and Y. Liu, Dioxazoles, a new mild nitrene transfer reagent in gold catalysis: highly efficient synthesis of functionalized oxazoles, *Chem. Commun.*, 2016, **52**, 6324–6327.
- 10 L. Wang, W. Wei, D. Yang, H. Cui, H. Yue and H. Wang, Direct cross-coupling of aryl alkynyl iodides with arylsulfinic acids leading to alkynyl sulfones under catalyst-free conditions, *Tetrahedron Lett.*, 2017, **58**, 4799–4802.
- 11 Y.-S. Xiong, J. Weng and G. Lu, Manganese(III)-Mediated and -Catalyzed Decarboxylative Hydroxysulfonylation of Arylpropionic Acids with Sodium Sulfinates in Water, *Adv. Synth. Catal.*, 2018, **360**, 1611–1616.

- 12 C. Liu, L. Ding, G. Guo and W. Liu, Oxysulfonylation of Alkenes with Sulfonyl Hydrazides under Transition-Metal-Free Conditions, *Eur. J. Org. Chem.*, 2016, **2016**, 910–912.
- 13 G. Chit Tsui, Q. Glenadel, C. Lau and M. Lautens, Rhodium(I)-Catalyzed Addition of Arylboronic Acids to (Benzyl-/Arylsulfonyl)acetonitriles: Efficient Synthesis of (Z)- $\beta$ -Sulfonylvinyamines and  $\beta$ -Keto Sulfones, *Org. Lett.*, 2010, **13**, 208–211.
- 14 Q. Liu, F. Liu, H. Yue, X. Zhao, J. Li and W. Wei, Photocatalyst-Free Visible Light-Induced Synthesis of  $\beta$ -Oxo Sulfones via Oxysulfonylation of Alkenes with Arylazo Sulfones and Dioxygen in Air, *Adv. Synth. Catal.*, 2019, **361**, 5277–5282.
- 15 X. Shi, X. Ren, Z. Ren, J. Li, Y. Wang, S. Yang, J. Gu, Q. Gao and G. Huang, Iron(III)-Catalyzed Aerobic Oxidation and Cleavage/Formation of a C–S Bond, *Eur. J. Org. Chem.*, 2014, **2014**, 5083–5088.
- 16 A. R. Maguire and D. G. Lowney, Asymmetric reduction of 1-methylsulfonylalkan-2-ones with baker's yeast, *J. Chem. Soc. Perkin Trans. 1*, 1997, 235–238.
- 17 Q. Luo, R. Mao, Y. Zhu and Y. Wang, Photoredox-Catalyzed Generation of Sulfamyl Radicals: Sulfonamidation of Enol Silyl Ether with Chlorosulfonamide, *J. Org. Chem.*, 2019, **84**, 13897–13907.
- 18 C.-K. Chan, C.-Y. Lai, W.-C. Lo, Y.-T. Cheng, M.-Y. Chang and C.-C. Wang, p-TsOH-mediated synthesis of substituted 2{,}4-diaryl-3-sulfonylquinolines from functionalized 2-aminobenzophenones and aromatic  $\beta$ -ketosulfones under microwave irradiation, *Org. Biomol. Chem.*, 2020, **18**, 305–315.
- 19 G. Bai, X. Lan, X. Liu, C. Liu, L. Shi, Q. Chen and G. Chen, An ammonium molybdate deposited amorphous silica coated iron oxide magnetic core–shell nanocomposite for the efficient synthesis of 2-benzimidazoles using hydrogen peroxide, *Green Chem.*, 2014, **16**, 3160–3168.
- 20 M. T. Saraiva, G. P. Costa, N. Seus, R. F. Schumacher, G. Perin, M. W. Paixão, R. Luque and D. Alves, Room-Temperature Organocatalytic Cycloaddition of Azides with  $\beta$ -Keto Sulfones: Toward Sulfonyl-1,2,3-triazoles, *Org. Lett.*, 2015, **17**, 6206–6209.
- 21 M.-Y. Chang, Y.-C. Cheng and Y.-J. Lu, Bi(OTf)<sub>3</sub>-Mediated Cycloisomerization of  $\gamma$ -Alkynyl Arylketones: Application to the Synthesis of Substituted Furans, *Org. Lett.*, 2015, **17**, 1264–1267.

## 6 NMR Spectra

$^1\text{H}$  NMR (400 MHz,  $\text{CDCl}_3$ ) of **1b**

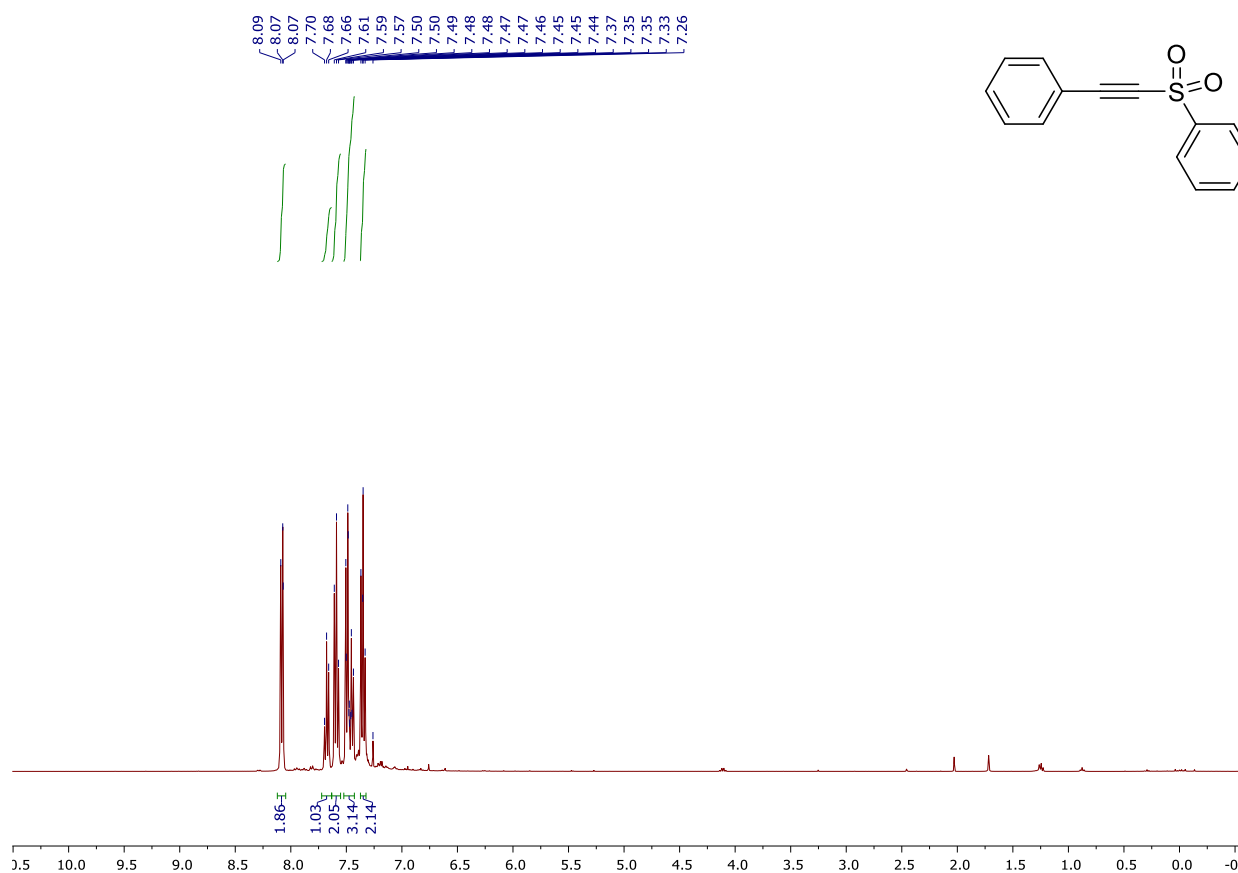

$^{13}\text{C}\{^1\text{H}\}$  NMR (100 MHz,  $\text{CDCl}_3$ ) of **1b**

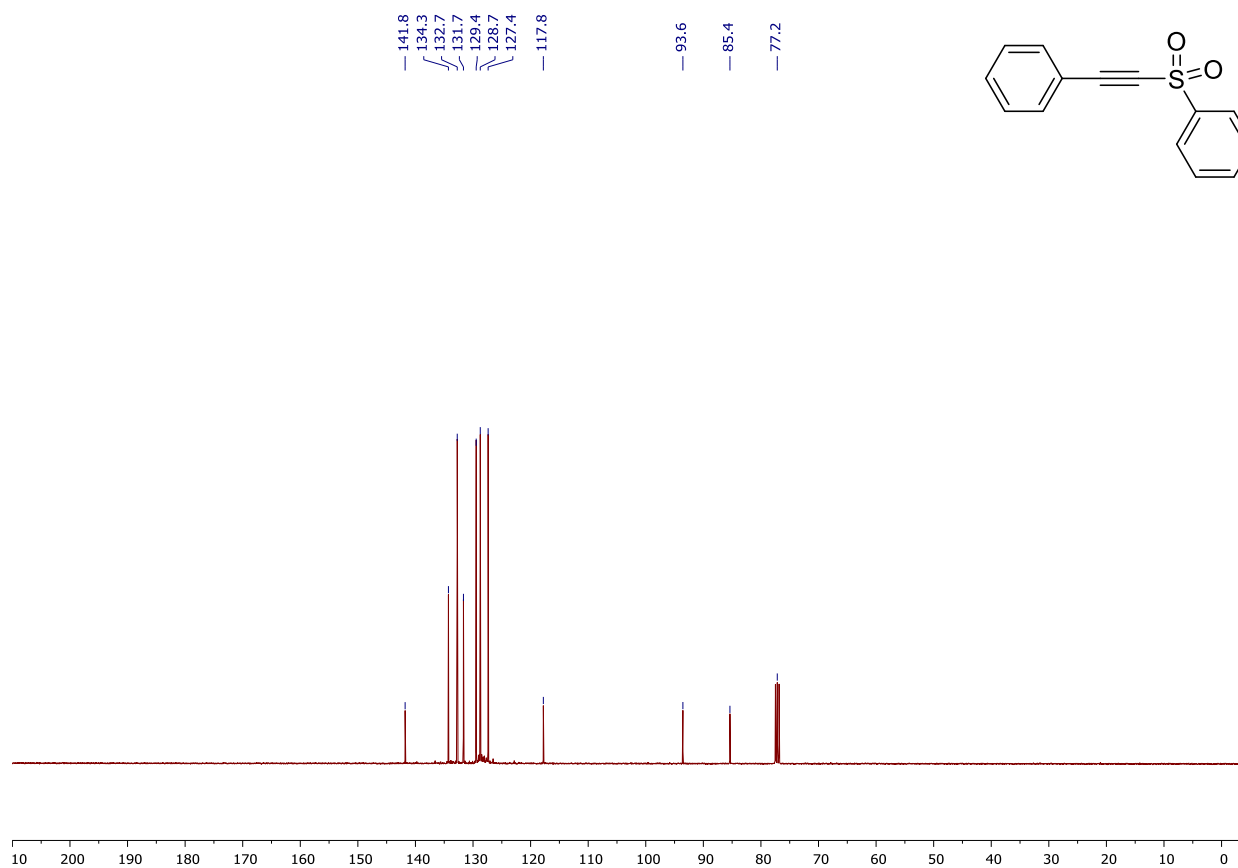



$^1\text{H}$  NMR (400 MHz,  $\text{CDCl}_3$ ) of **1e**

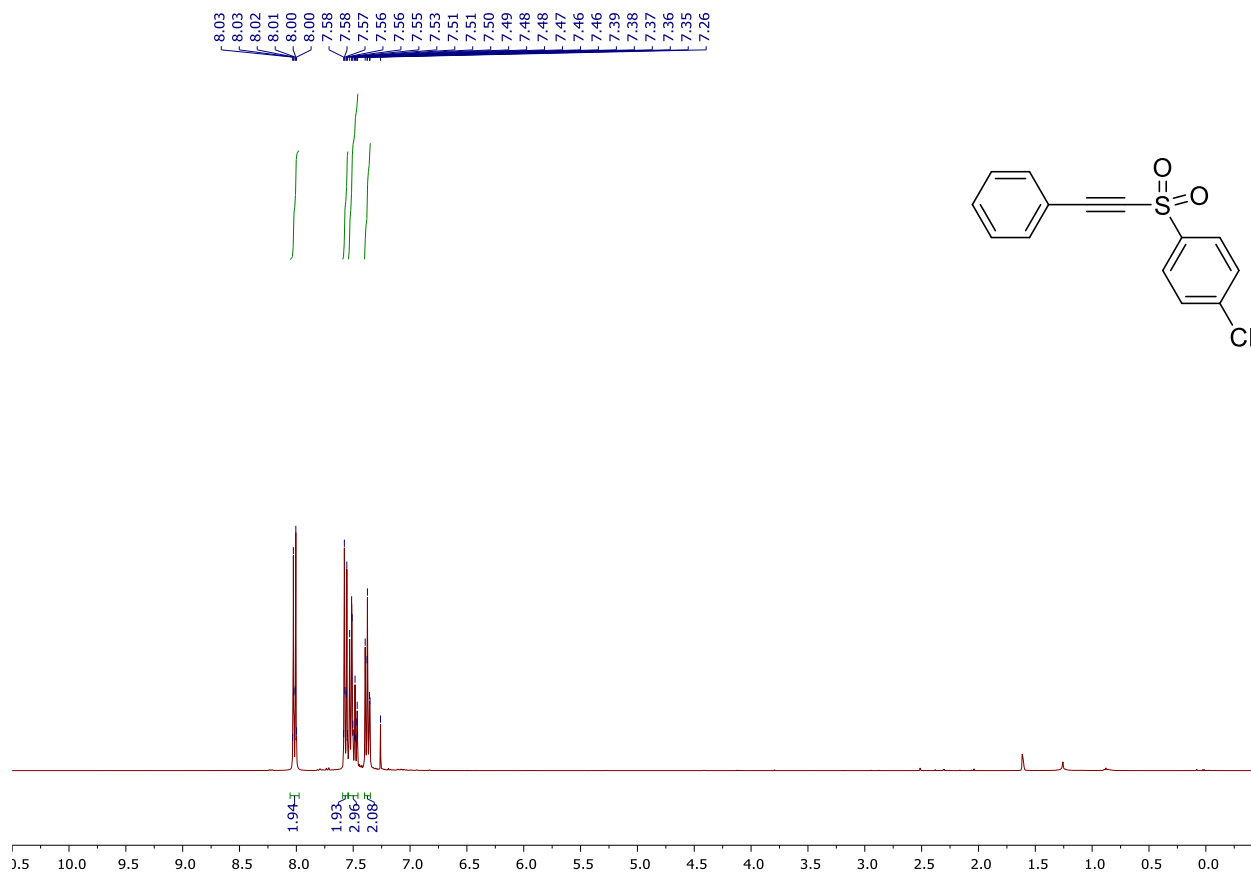

$^{13}\text{C}\{^1\text{H}\}$  NMR (100 MHz,  $\text{CDCl}_3$ ) of **1e**

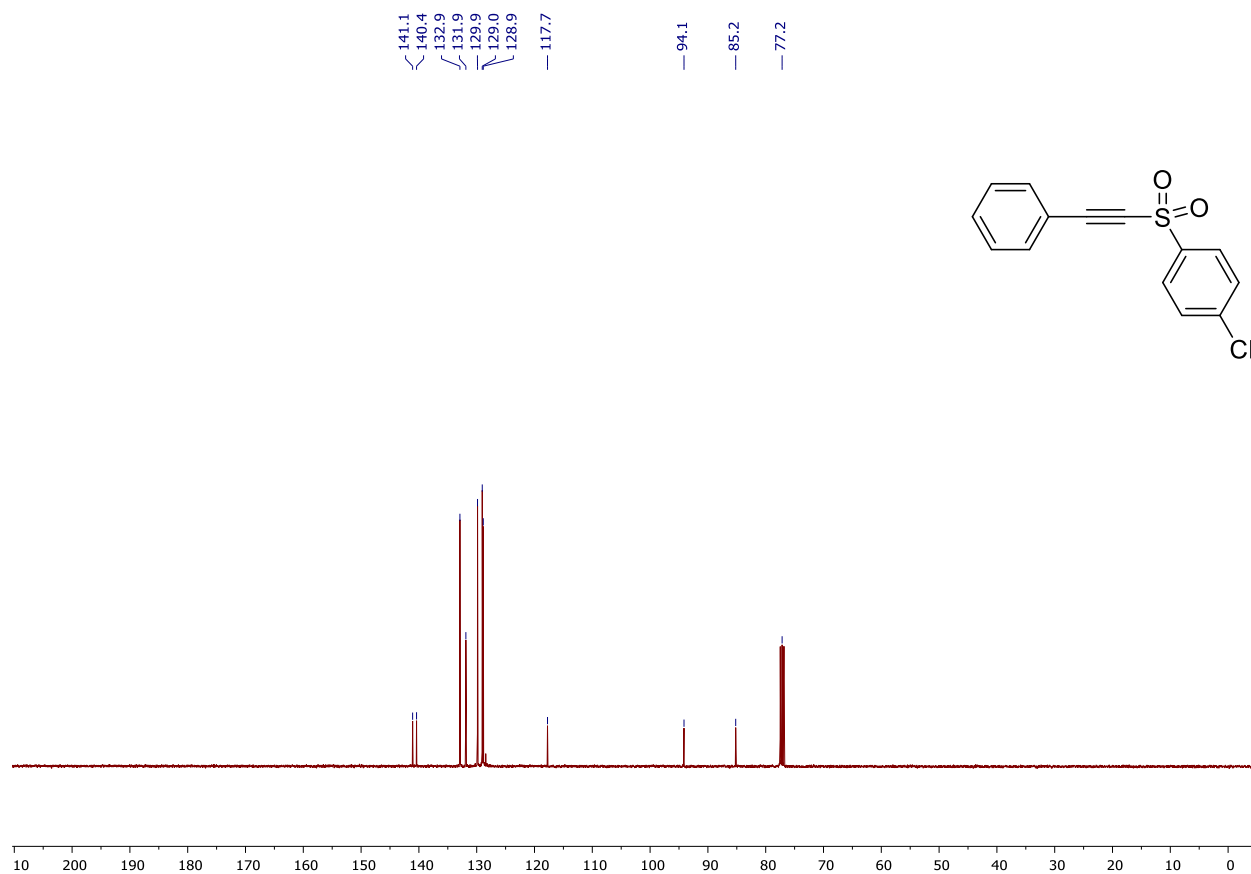

$^1\text{H}$  NMR (400 MHz,  $\text{CDCl}_3$ ) of **1g**

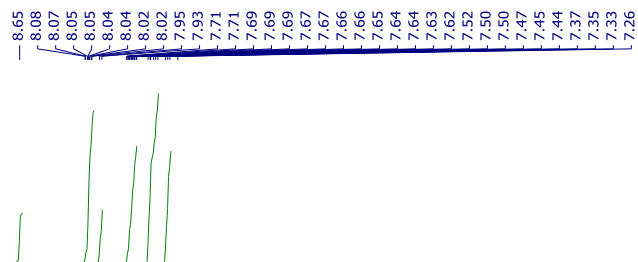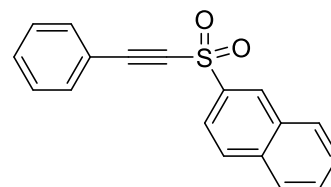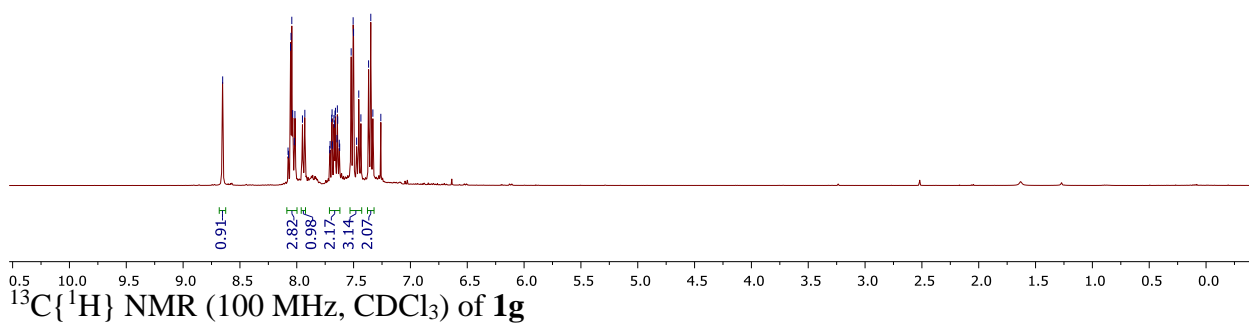

$^{13}\text{C}\{^1\text{H}\}$  NMR (100 MHz,  $\text{CDCl}_3$ ) of **1g**

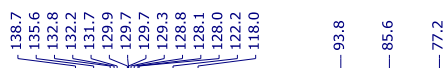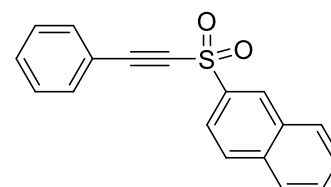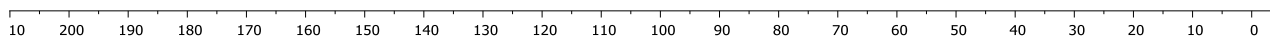

$^1\text{H}$  NMR (400 MHz,  $\text{CDCl}_3$ ) of **1v**

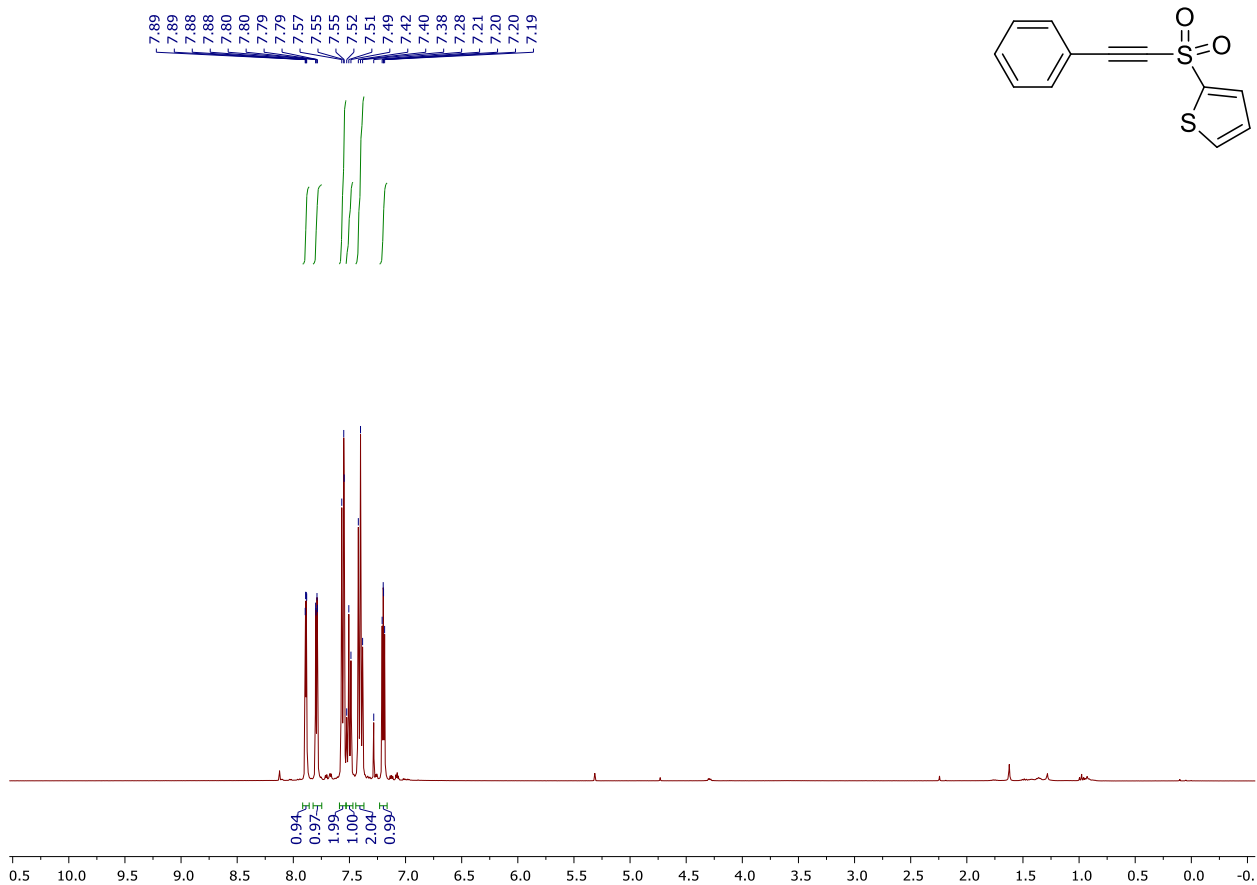

$^{13}\text{C}\{^1\text{H}\}$  NMR (100 MHz,  $\text{CDCl}_3$ ) of **1v**

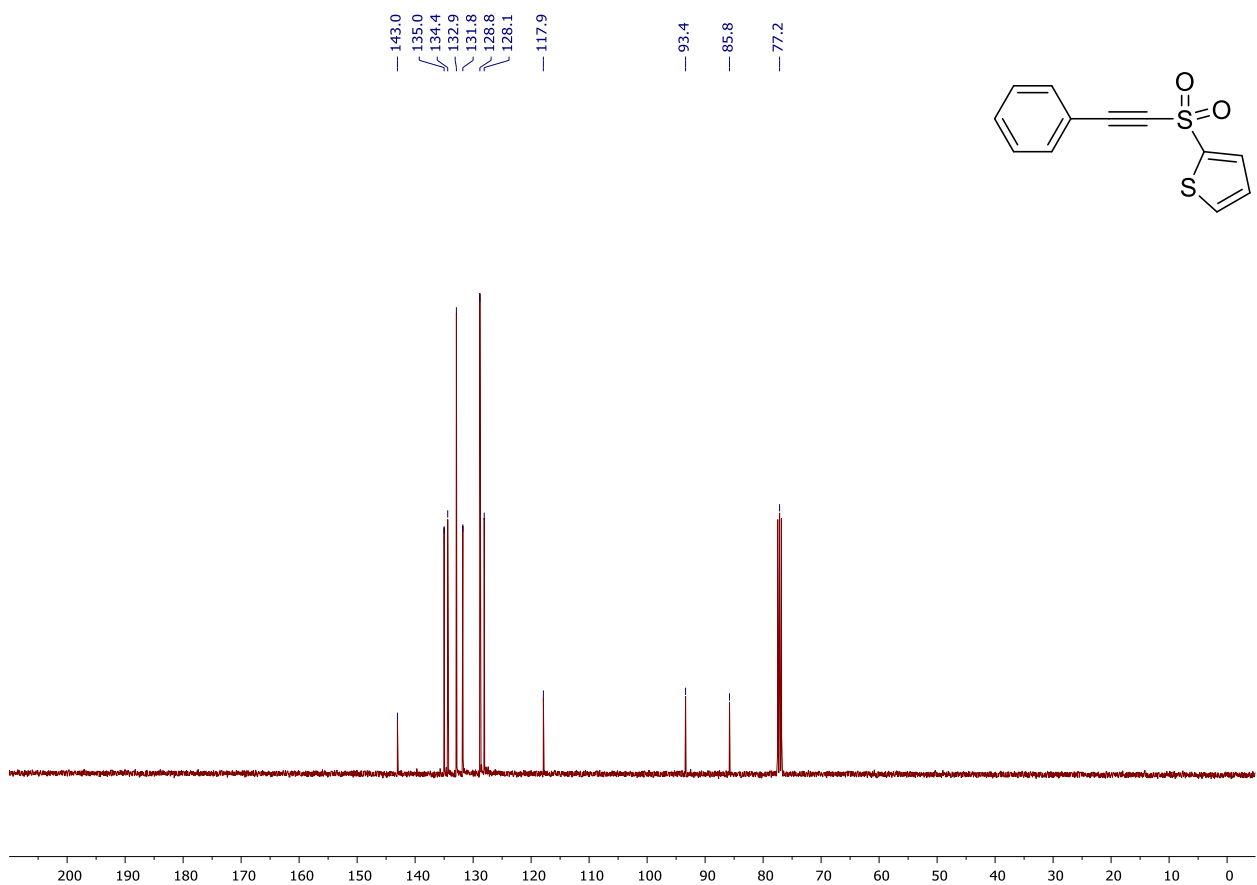

$^1\text{H}$  NMR (400 MHz,  $\text{CDCl}_3$ ) of **1n**

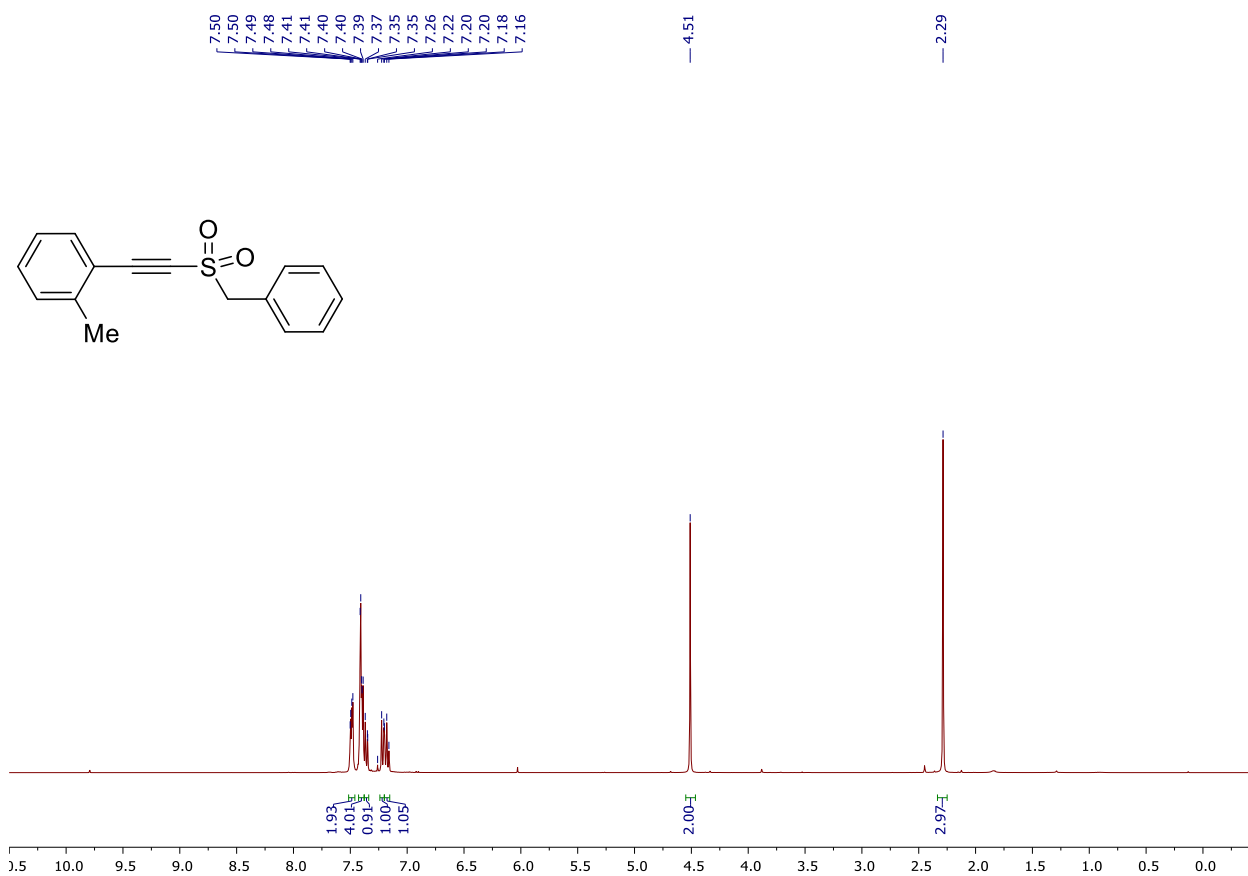

$^{13}\text{C}\{^1\text{H}\}$  NMR (100 MHz,  $\text{CDCl}_3$ ) of **1n**

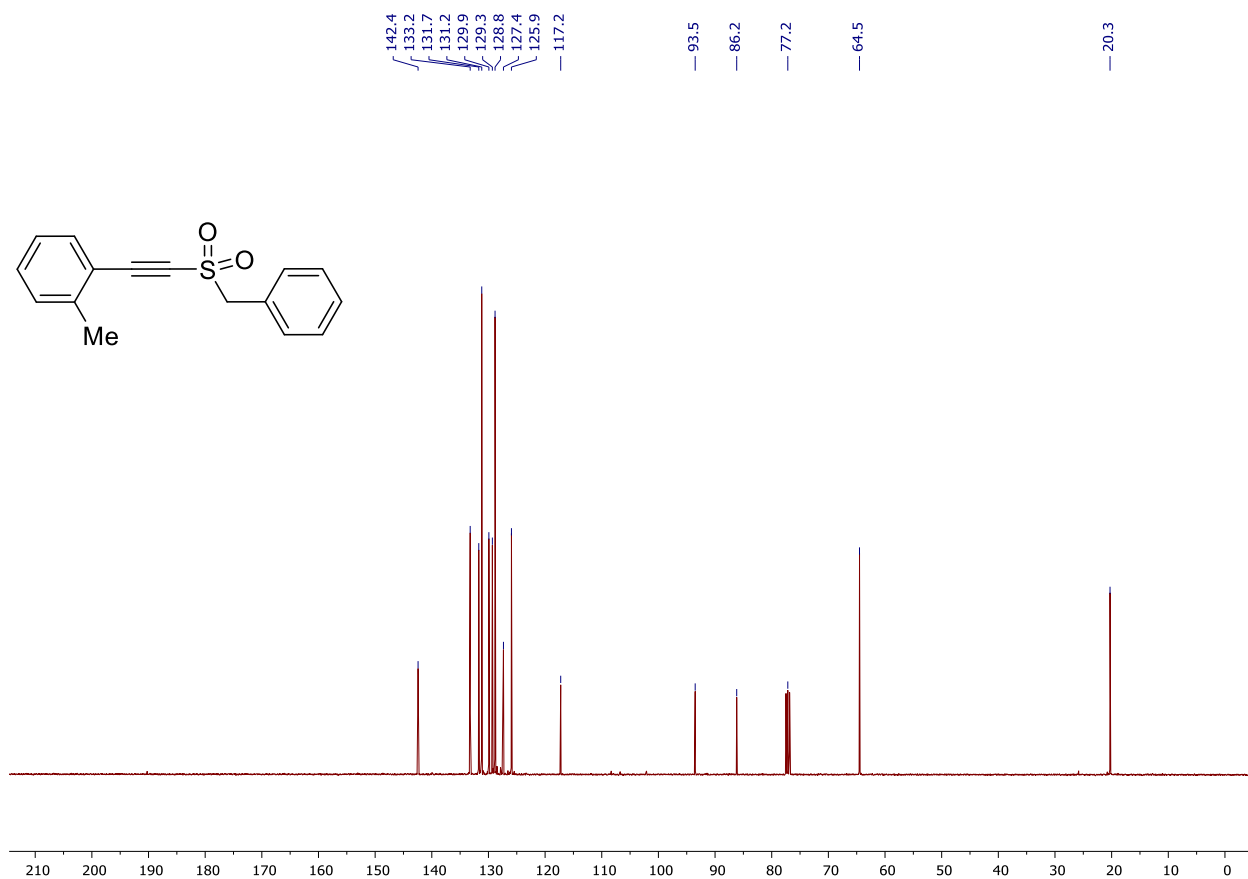

$^1\text{H}$  NMR (400 MHz,  $\text{CDCl}_3$ ) of **1o**

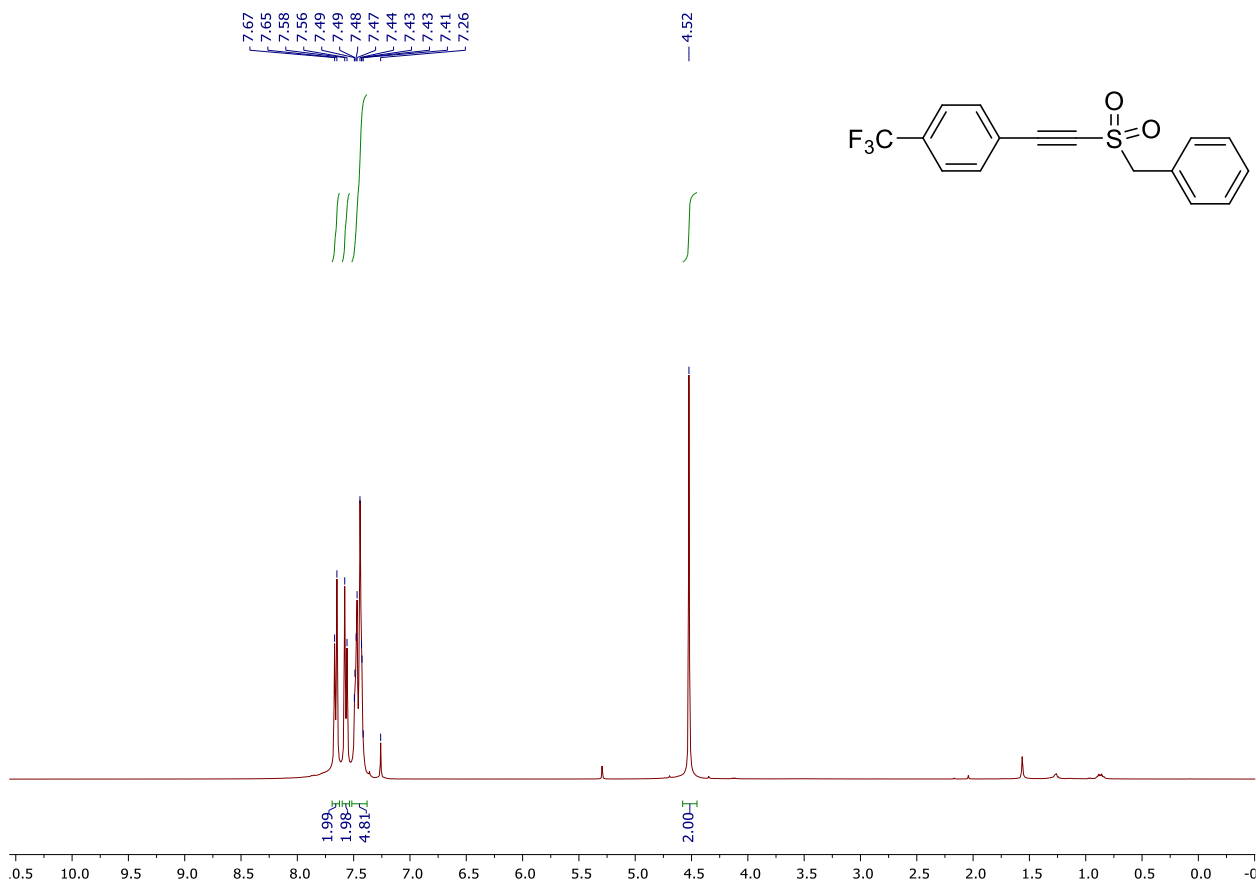

$^{13}\text{C}\{^1\text{H}\}$  NMR (100 MHz,  $\text{CDCl}_3$ ) of **1o**

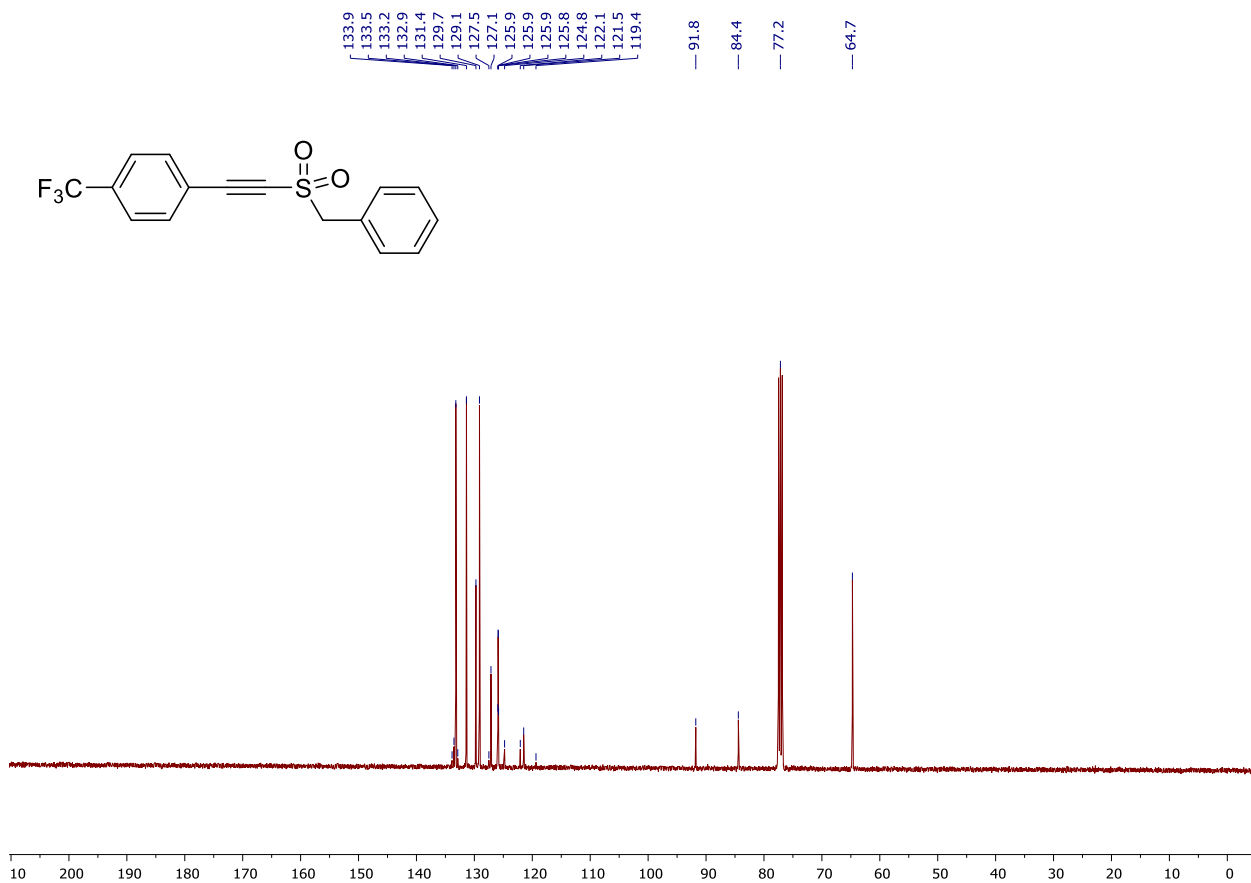

$^{19}\text{F}\{^1\text{H}\}$  NMR (376 MHz,  $\text{CDCl}_3$ ) of **1o**

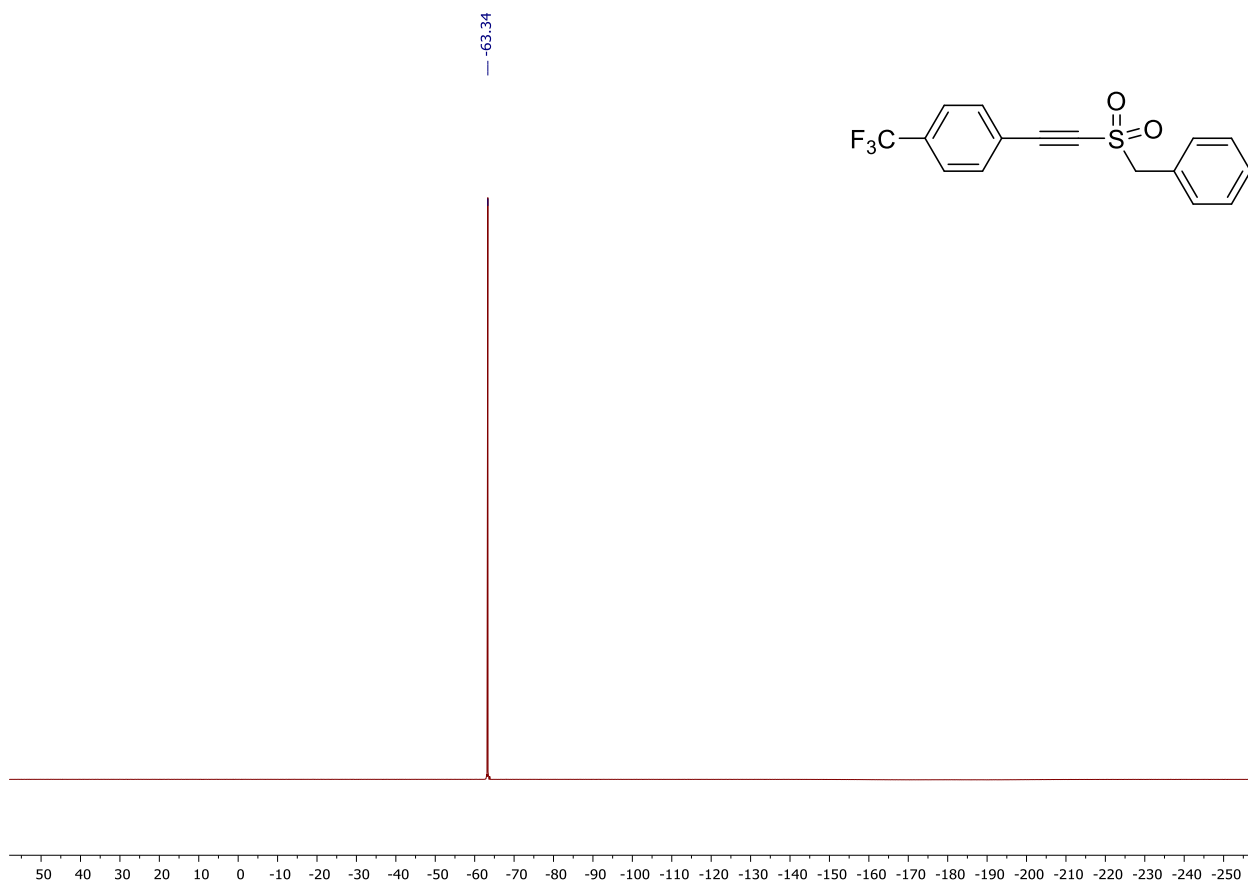

$^1\text{H}$  NMR (400 MHz,  $\text{CDCl}_3$ ) of **1p**

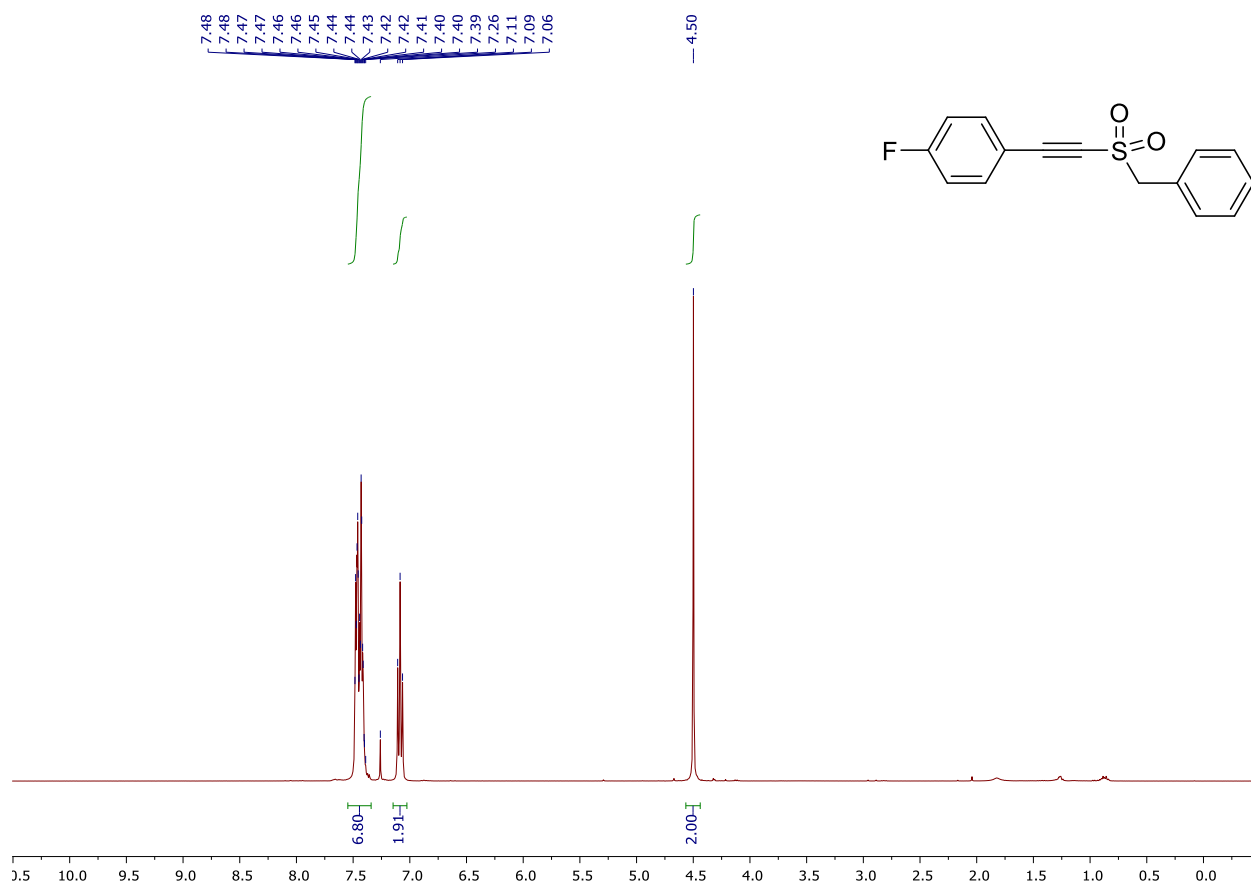

$^{13}\text{C}\{^1\text{H}\}$  NMR (100 MHz,  $\text{CDCl}_3$ ) of **1p**

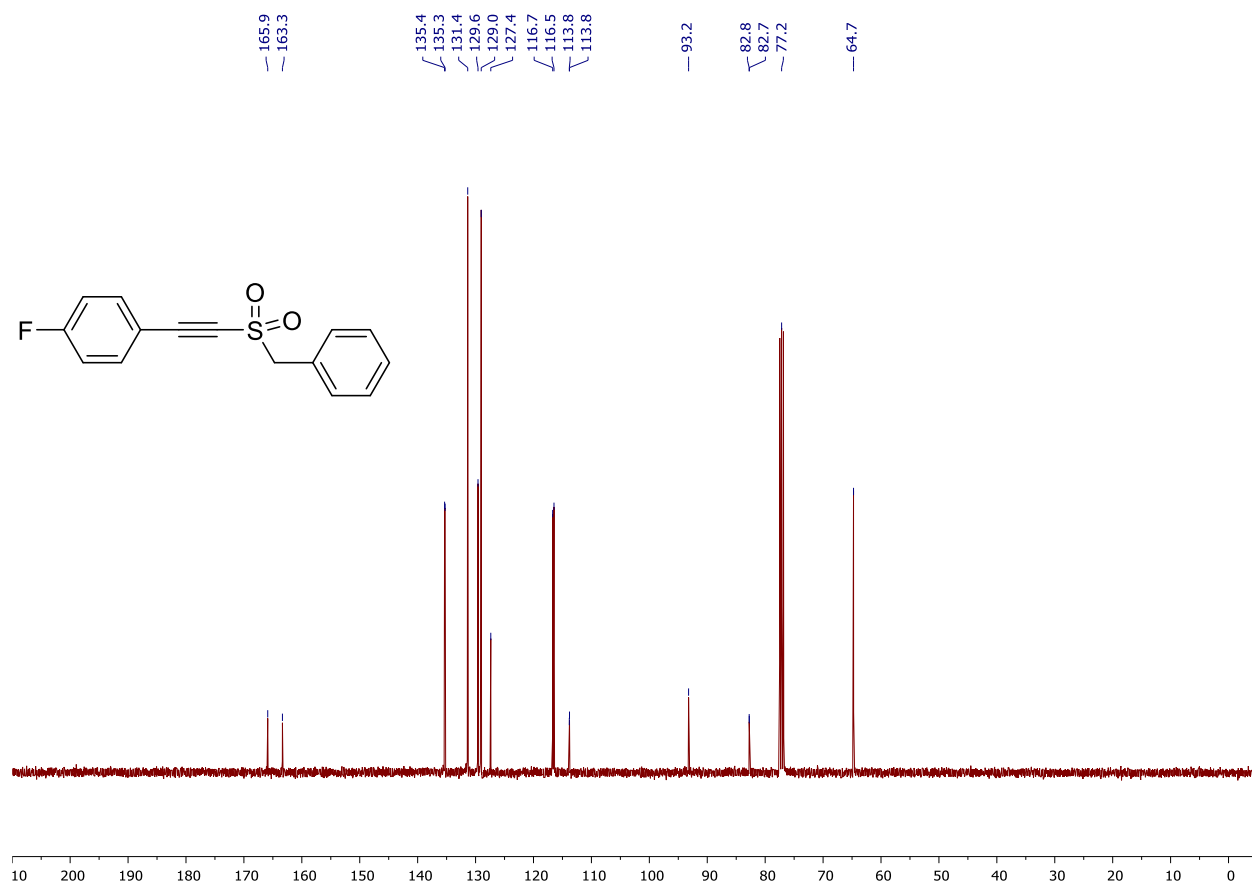

$^{19}\text{F}\{^1\text{H}\}$  NMR (376 MHz,  $\text{CDCl}_3$ ) of **1p**

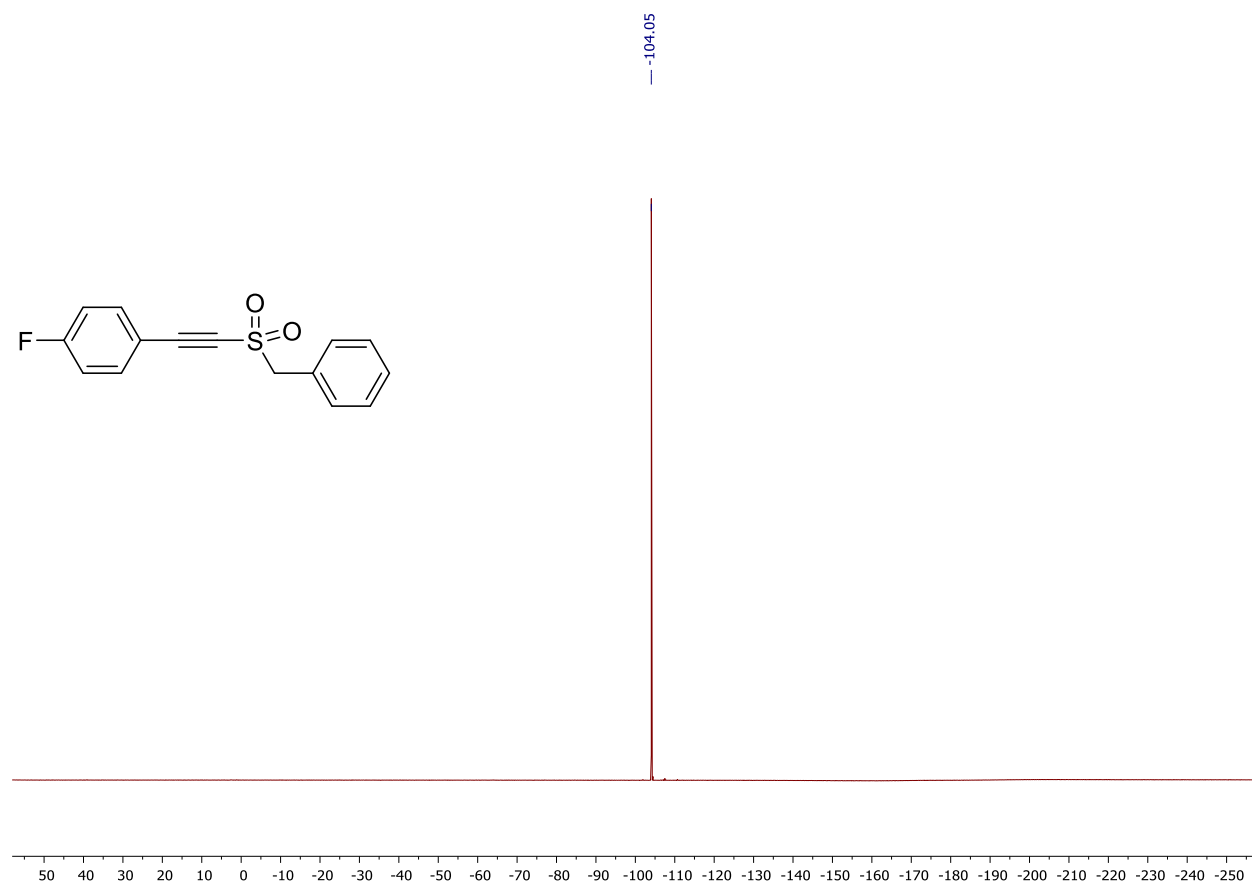

$^1\text{H}$  NMR (400 MHz,  $\text{CDCl}_3$ ) of **1t**

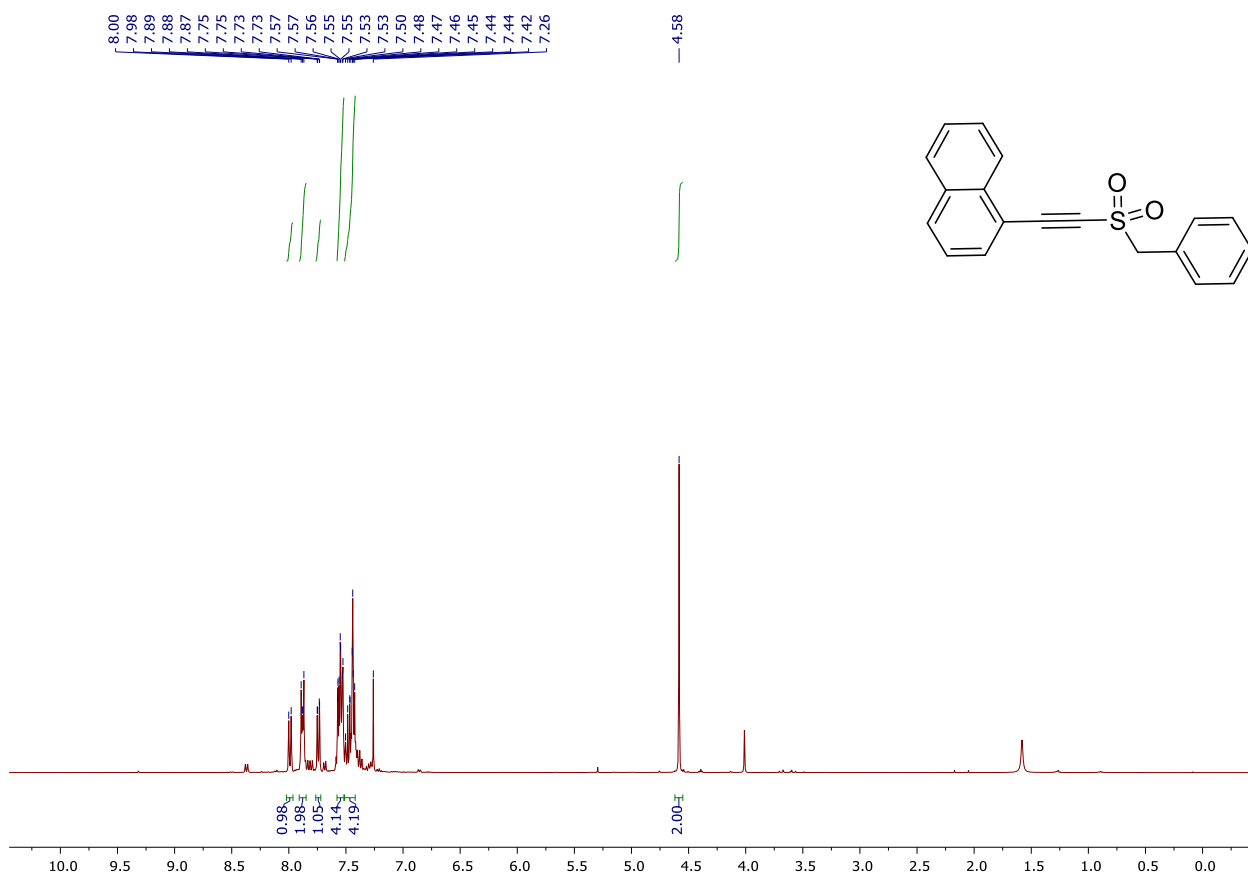

$^{13}\text{C}\{^1\text{H}\}$  NMR (100 MHz,  $\text{CDCl}_3$ ) of **1t**

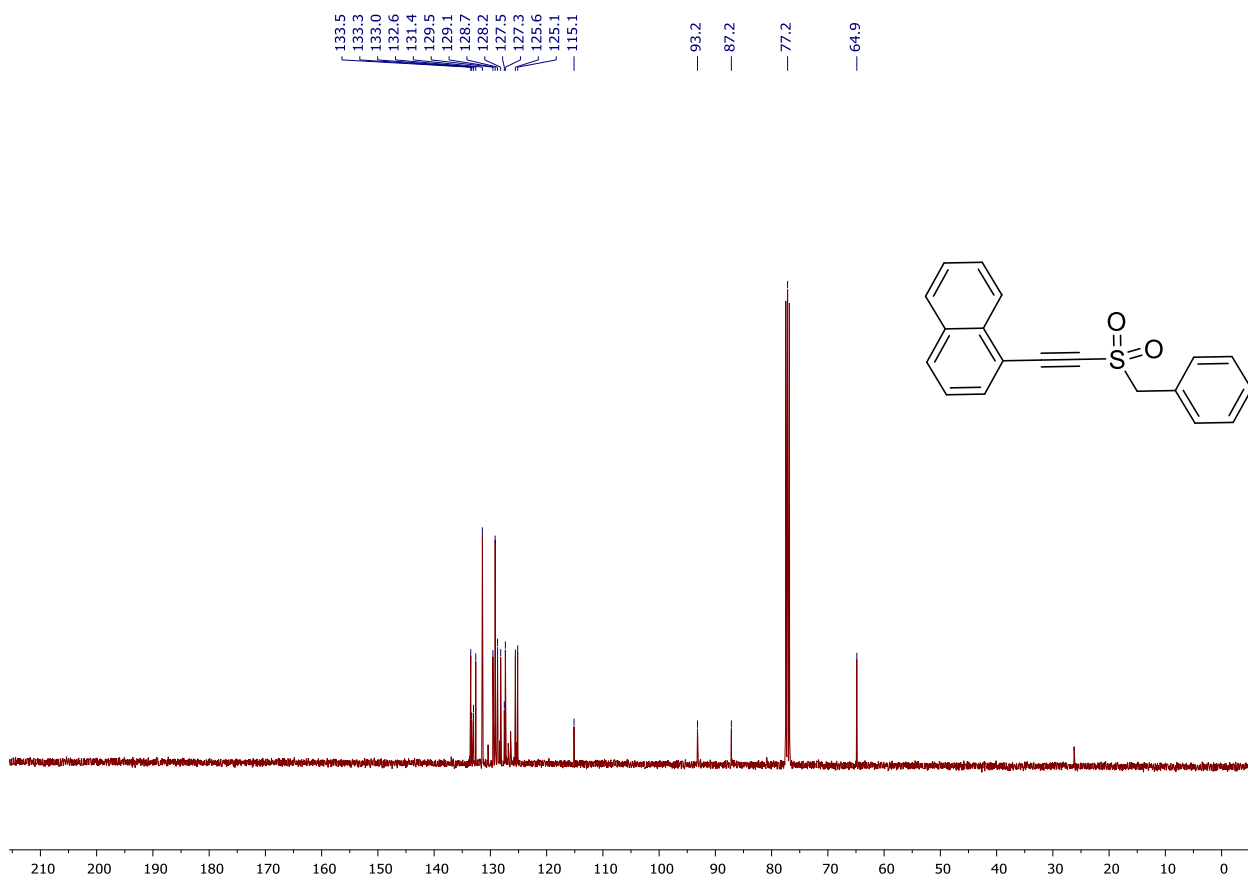



$^1\text{H}$  NMR (400 MHz,  $\text{CDCl}_3$ ) of **1w**

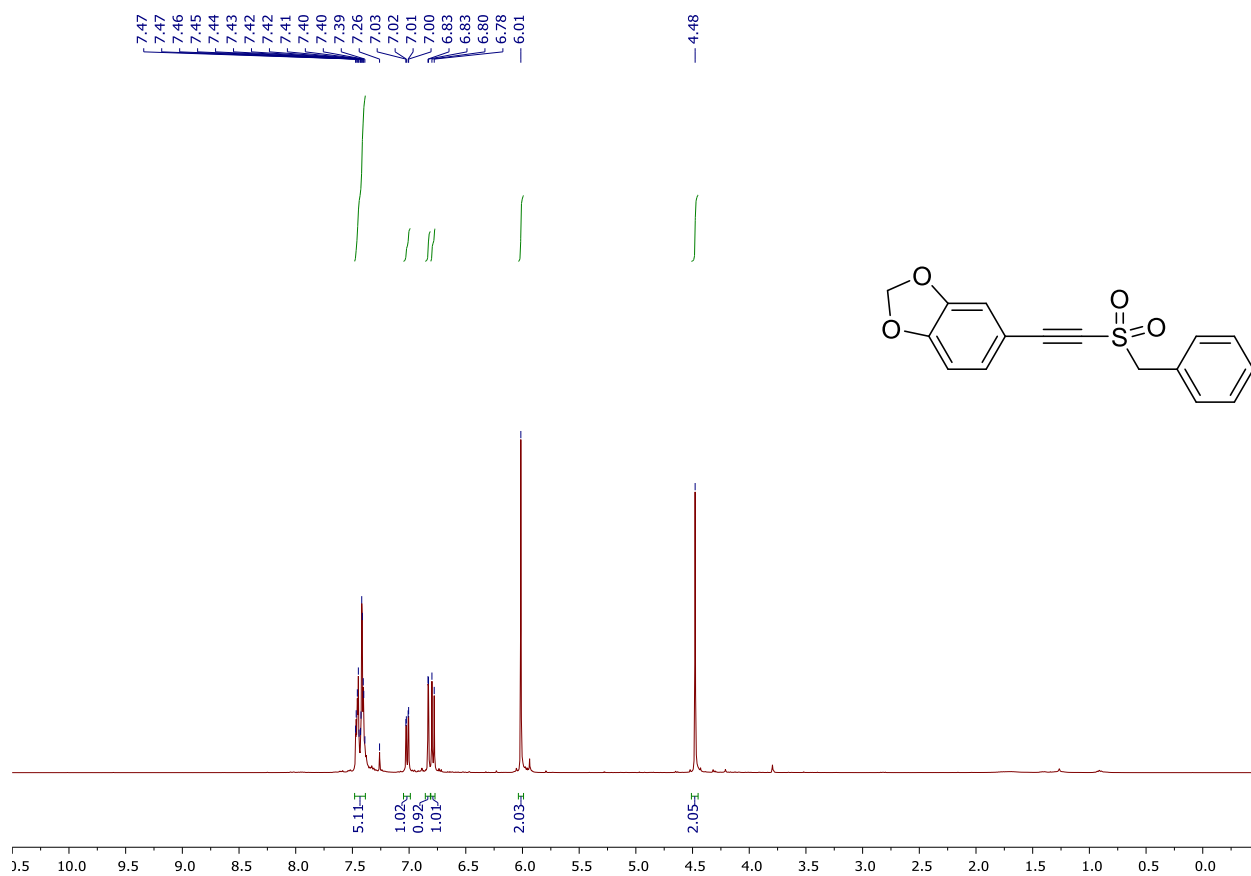

$^{13}\text{C}\{^1\text{H}\}$  NMR (100 MHz,  $\text{CDCl}_3$ ) of **1w**

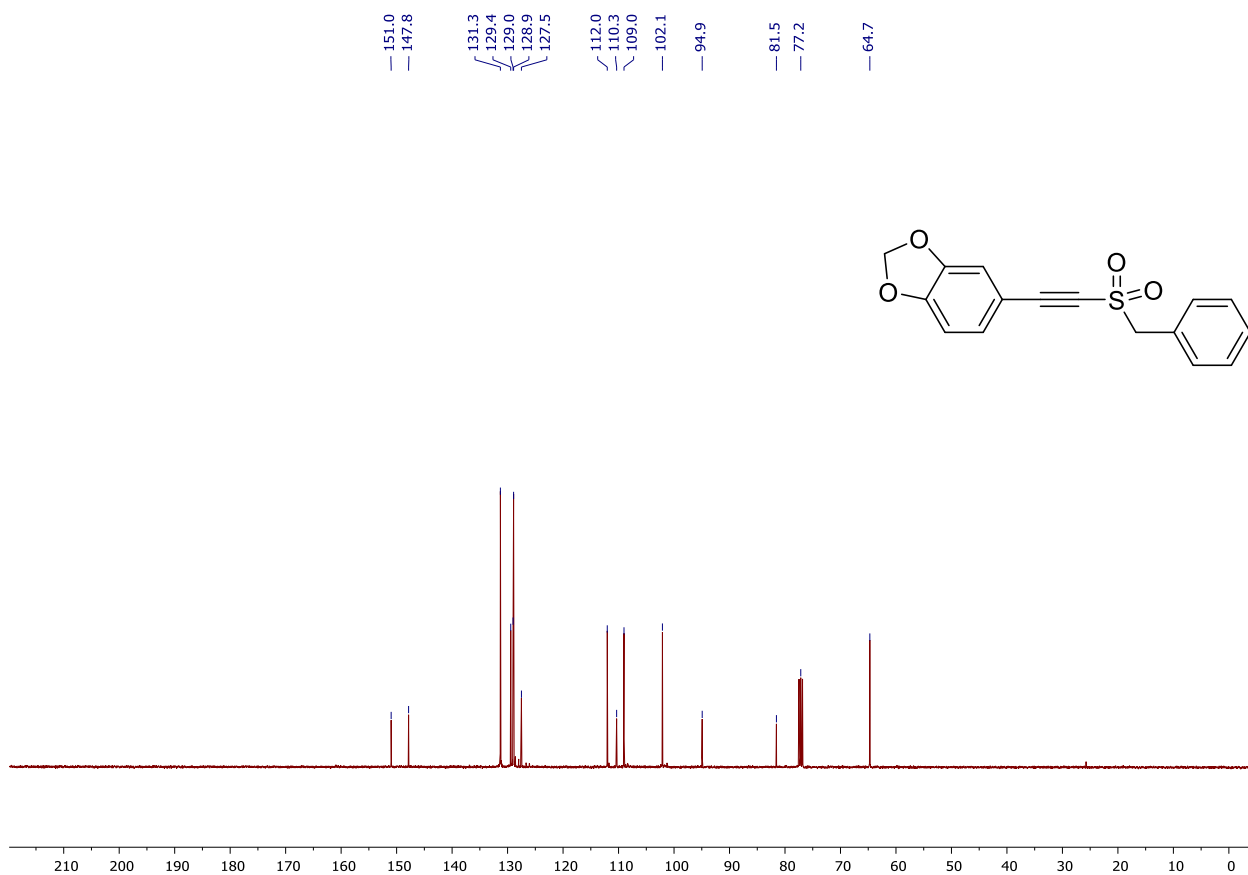

$^1\text{H}$  NMR (400 MHz,  $\text{CDCl}_3$ ) of **1x**

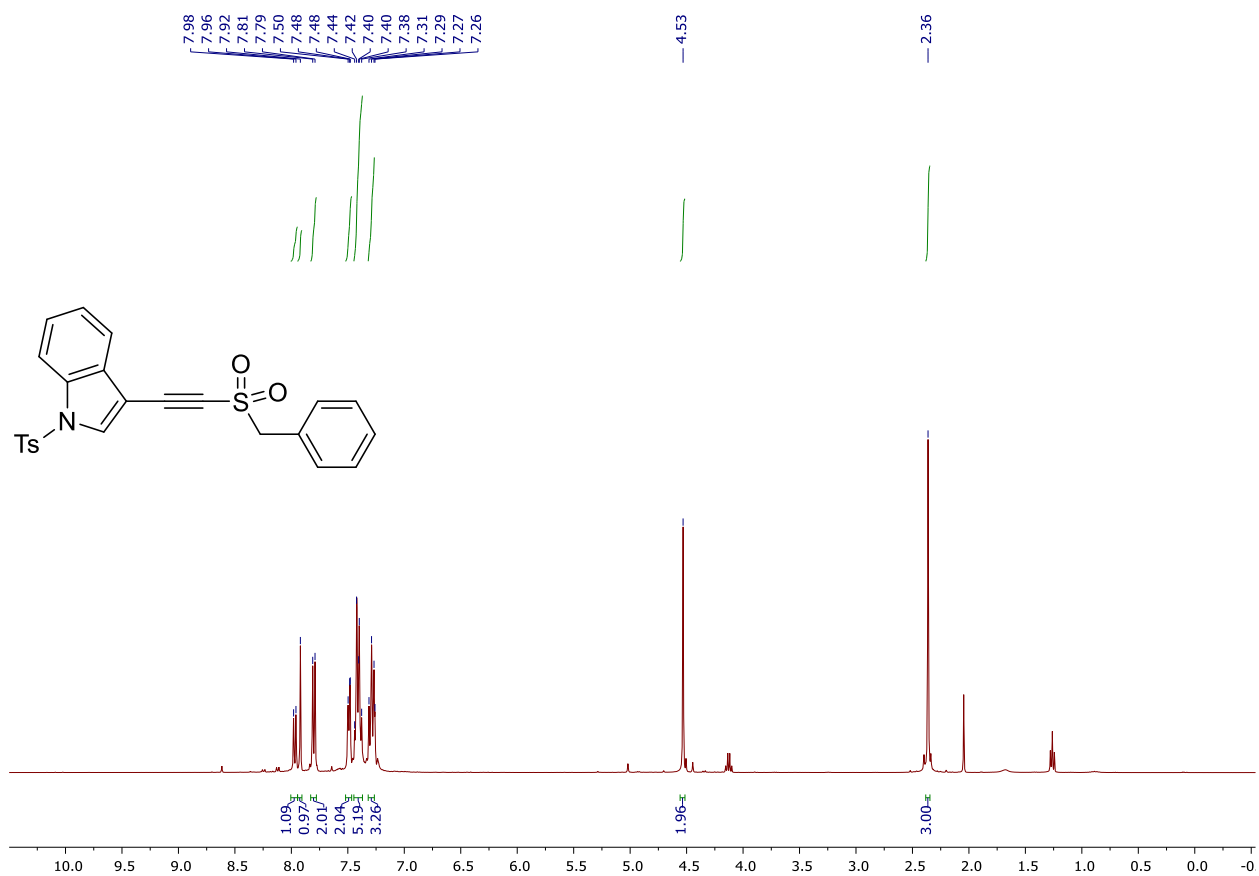

$^{13}\text{C}\{^1\text{H}\}$  NMR (100 MHz,  $\text{CDCl}_3$ ) of **1x**

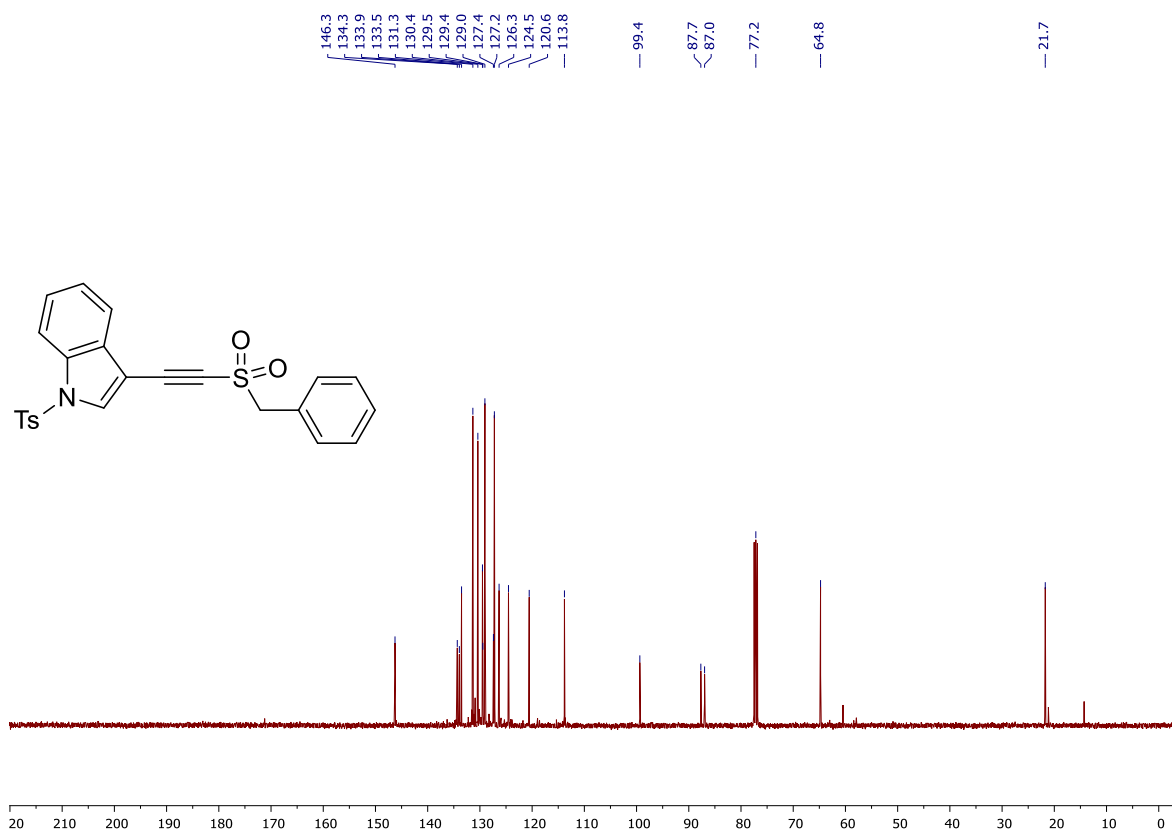

$^1\text{H}$  NMR (400 MHz,  $\text{CDCl}_3$ ) of **1ae**

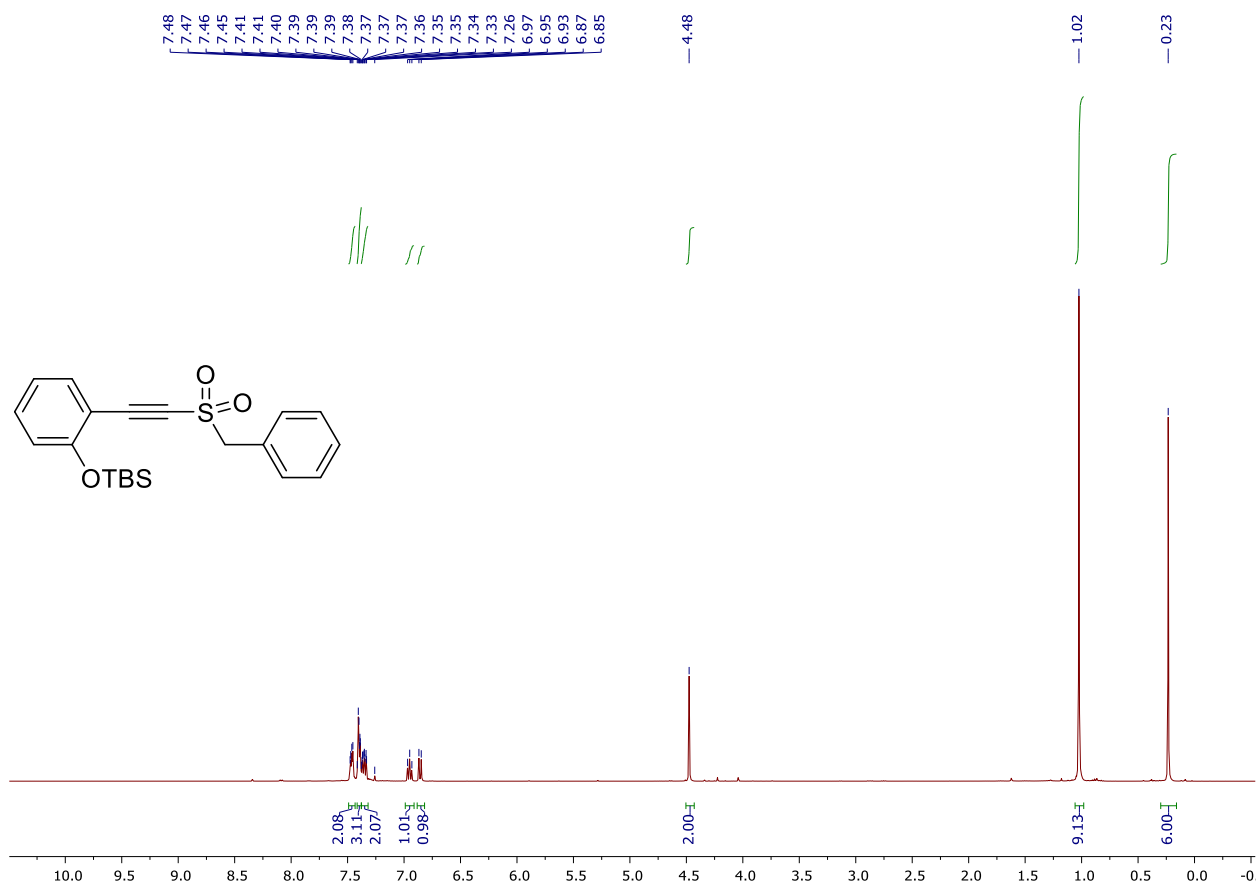

$^{13}\text{C}\{^1\text{H}\}$  NMR (100 MHz,  $\text{CDCl}_3$ ) of **1ae**

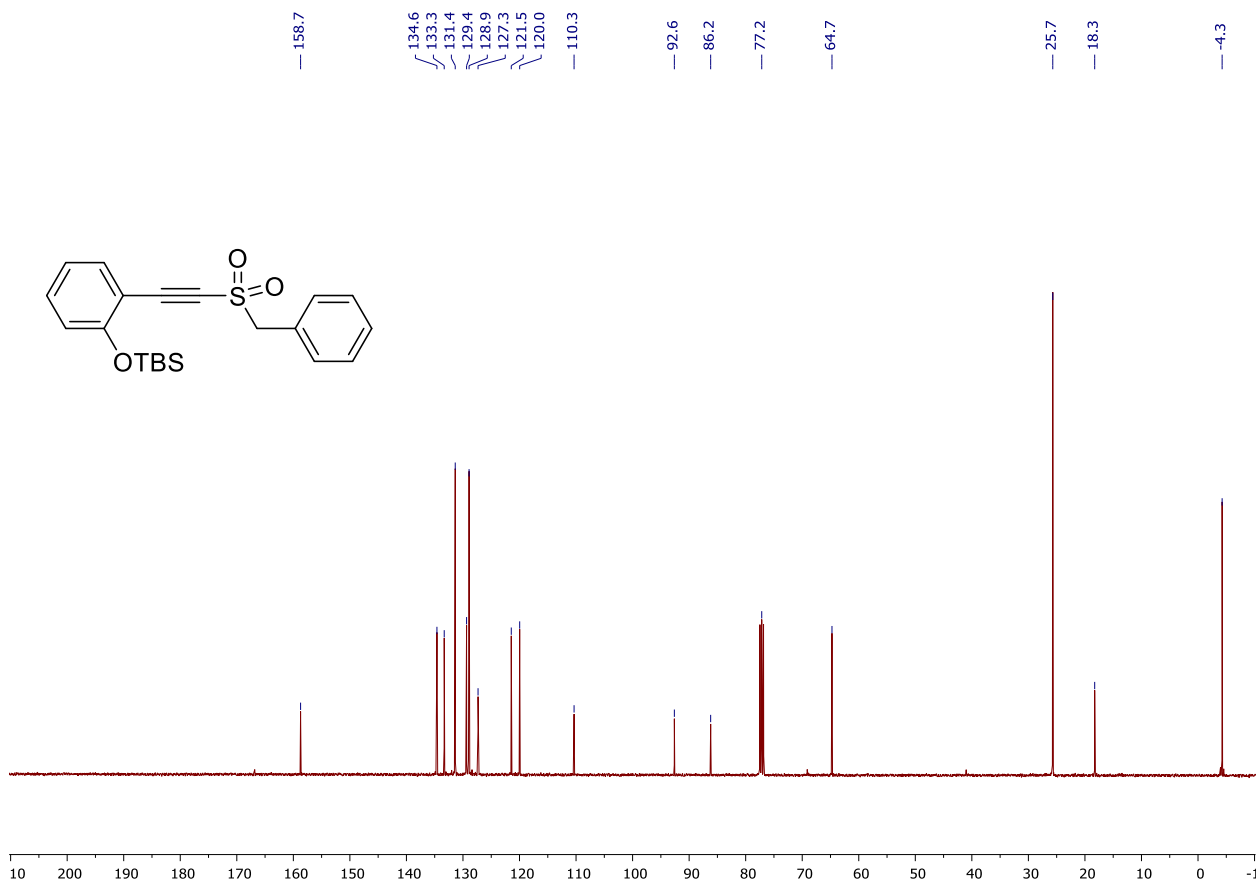

$^1\text{H}$  NMR (400 MHz,  $\text{CDCl}_3$ ) of **11**

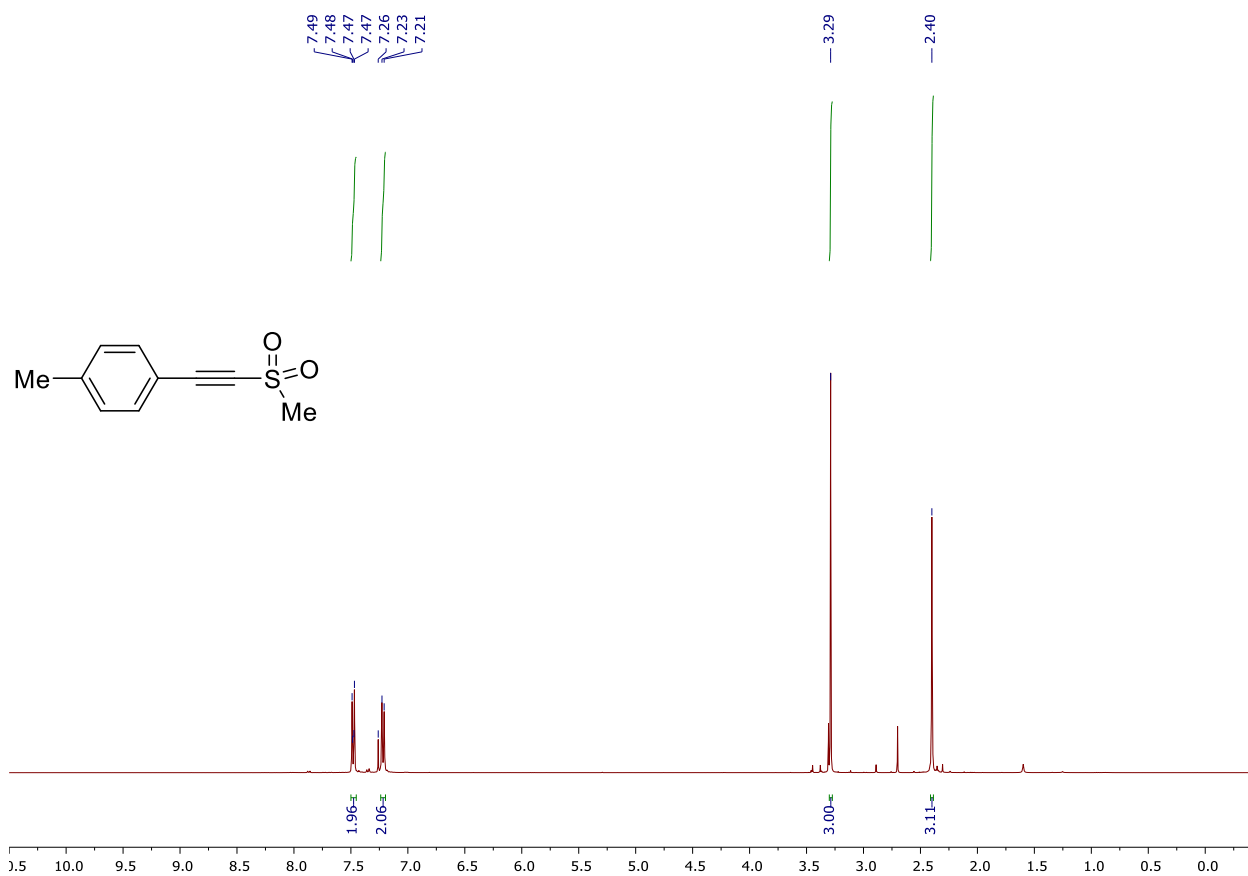

$^{13}\text{C}\{^1\text{H}\}$  NMR (100 MHz,  $\text{CDCl}_3$ ) of **11**

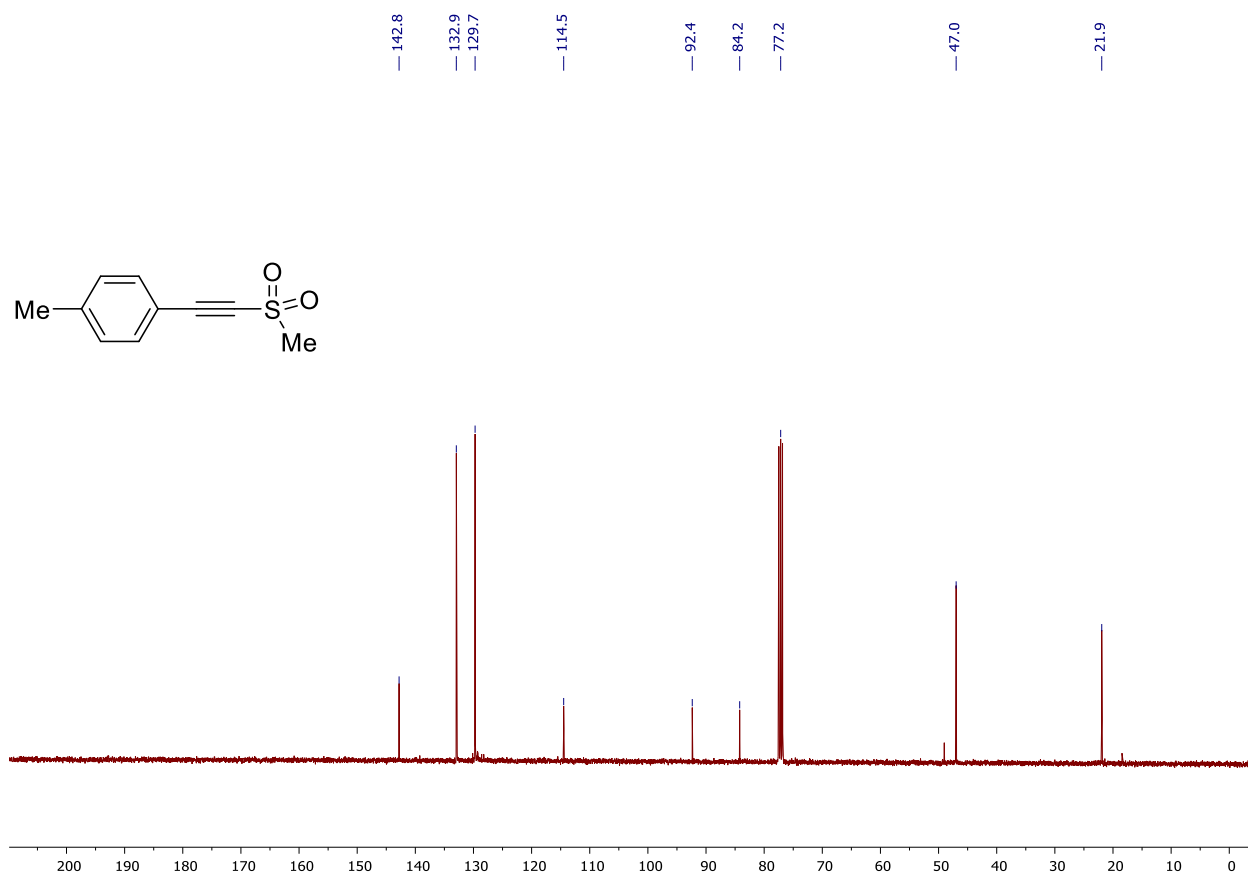

$^1\text{H}$  NMR (400 MHz,  $\text{CDCl}_3$ ) of **1m**

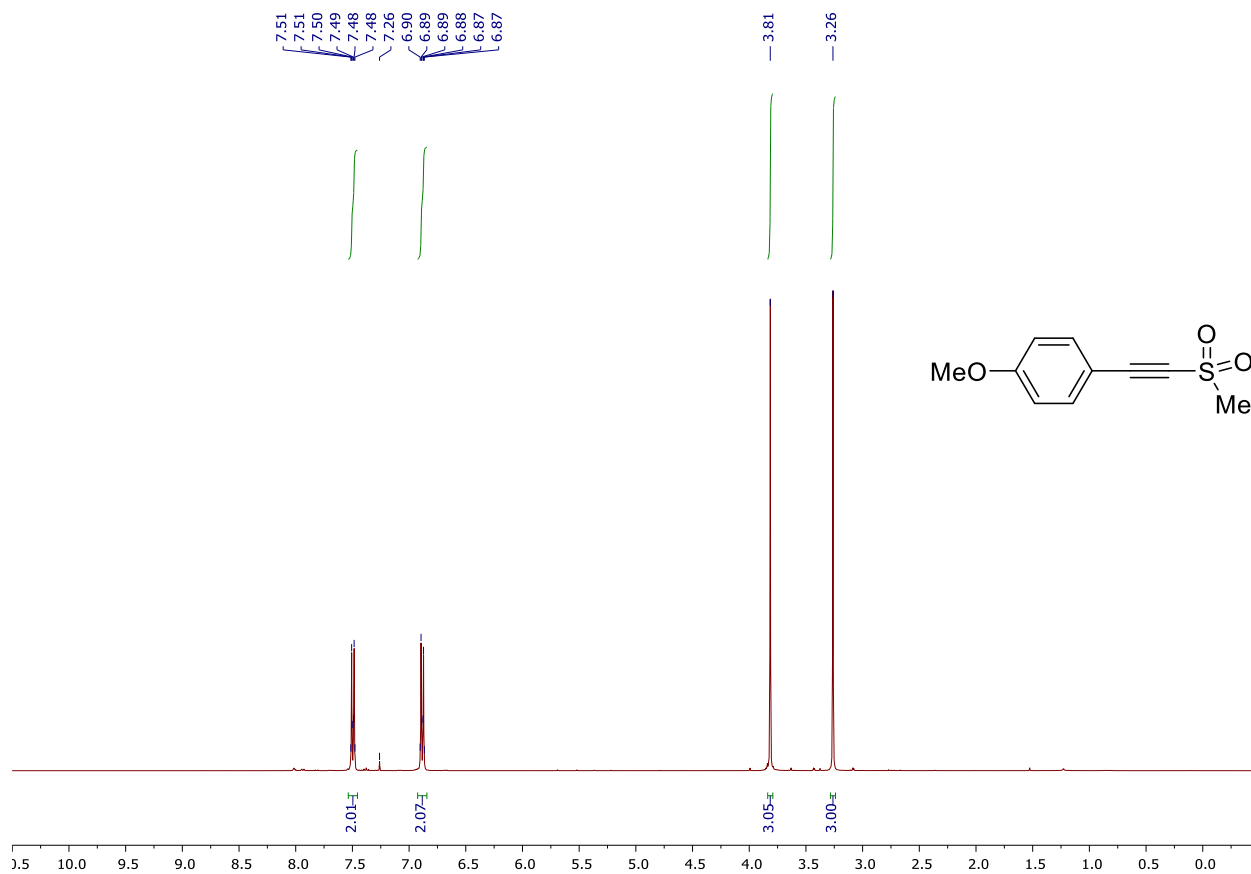

$^{13}\text{C}\{^1\text{H}\}$  NMR (100 MHz,  $\text{CDCl}_3$ ) of **1m**

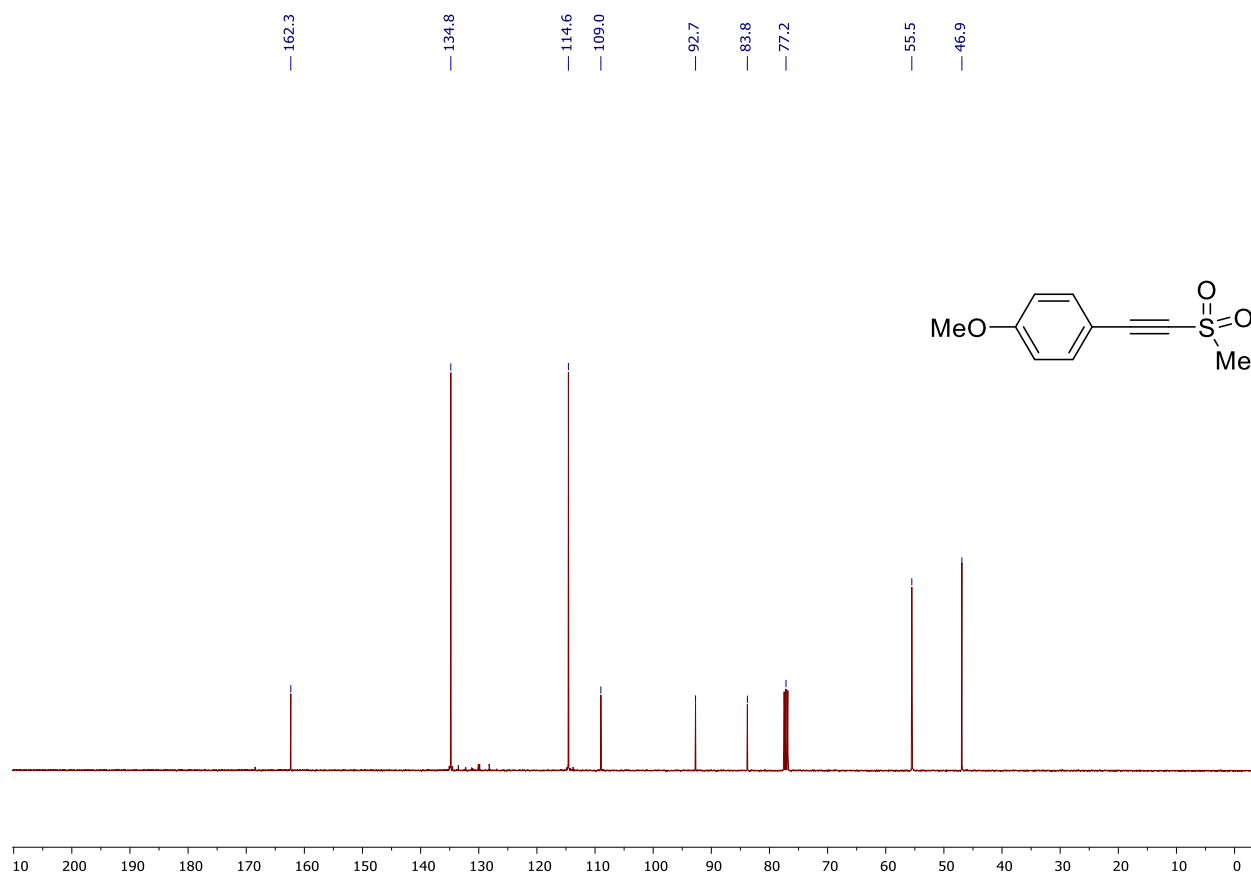

$^1\text{H}$  NMR (400 MHz,  $\text{CDCl}_3$ ) of **1u**

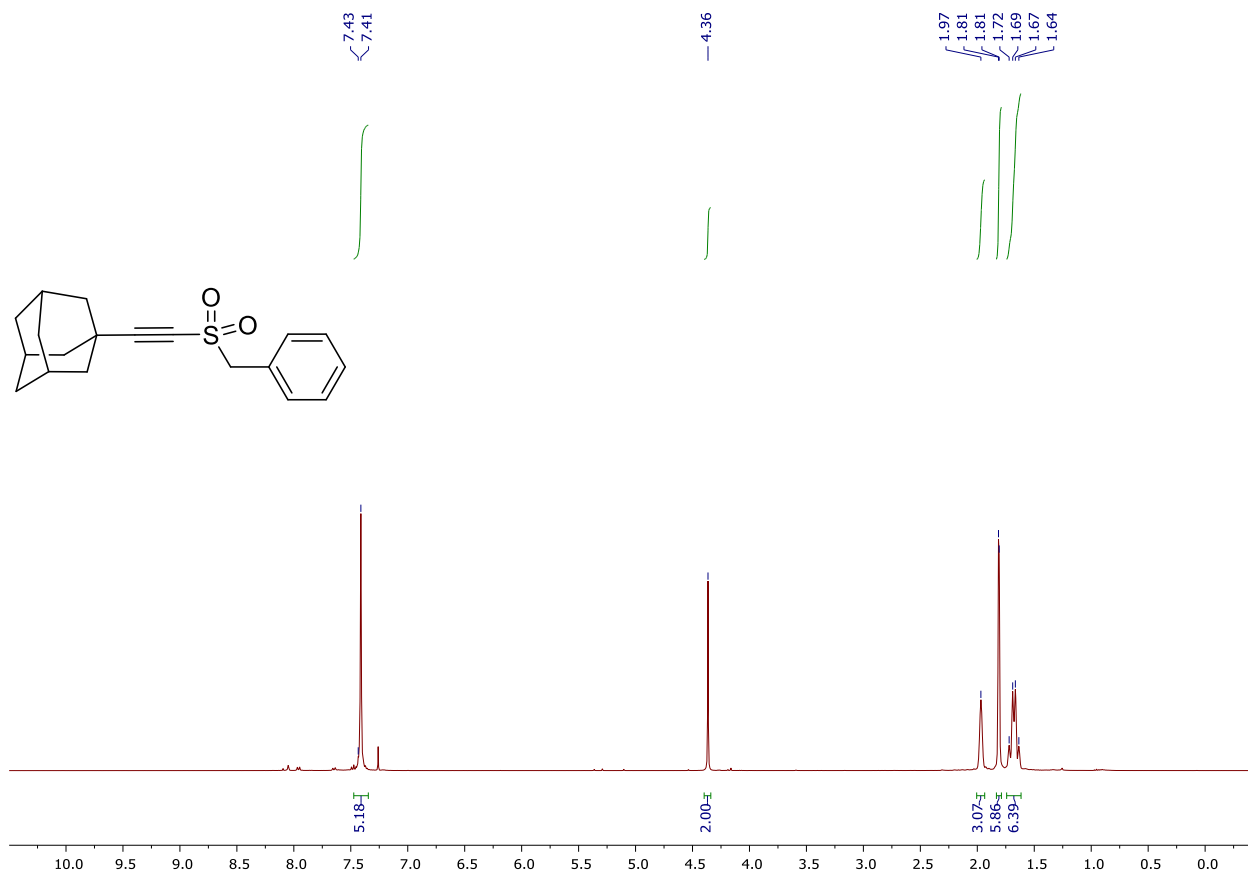

$^{13}\text{C}\{^1\text{H}\}$  NMR (100 MHz,  $\text{CDCl}_3$ ) of **1u**

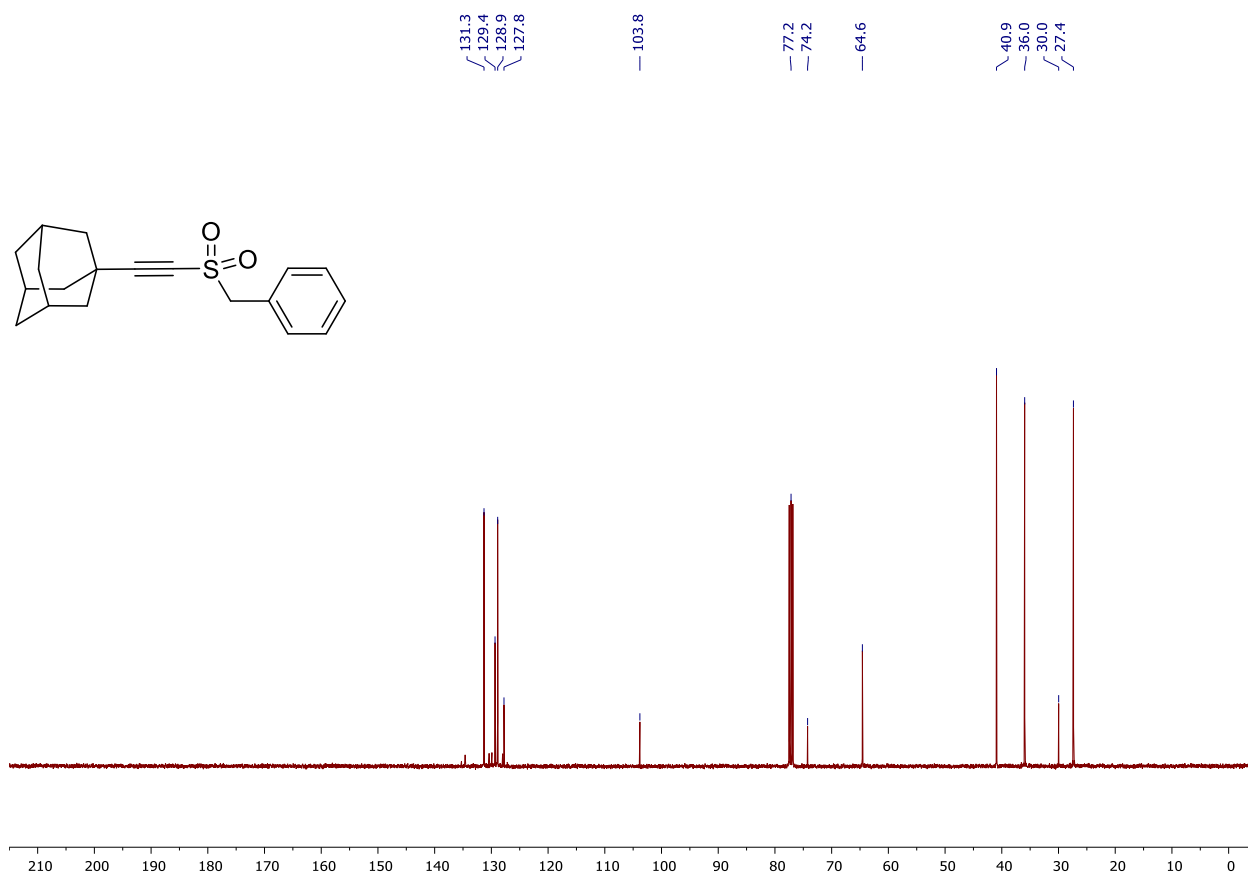

$^1\text{H}$  NMR (400 MHz,  $\text{CDCl}_3$ ) of **1z**

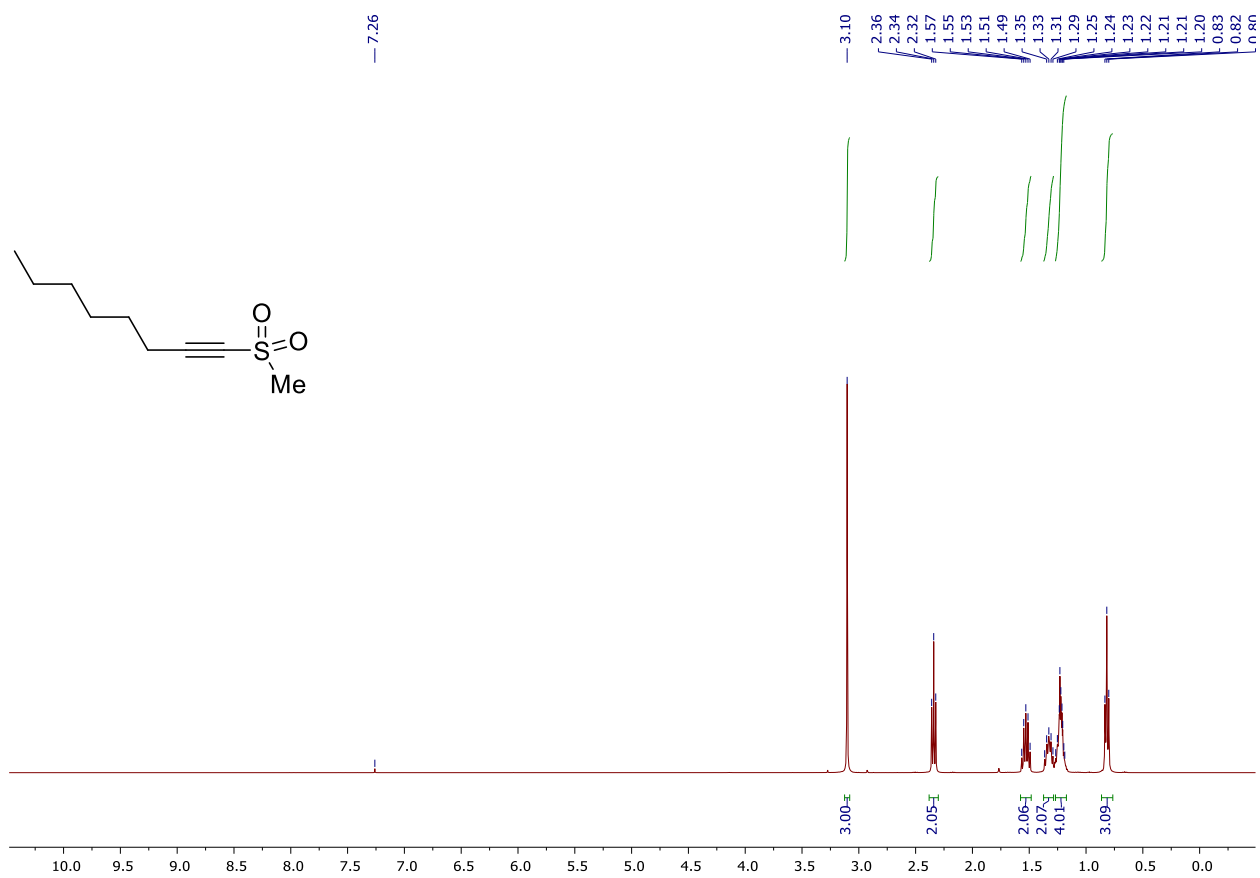

$^{13}\text{C}\{^1\text{H}\}$  NMR (100 MHz,  $\text{CDCl}_3$ ) of **1z**

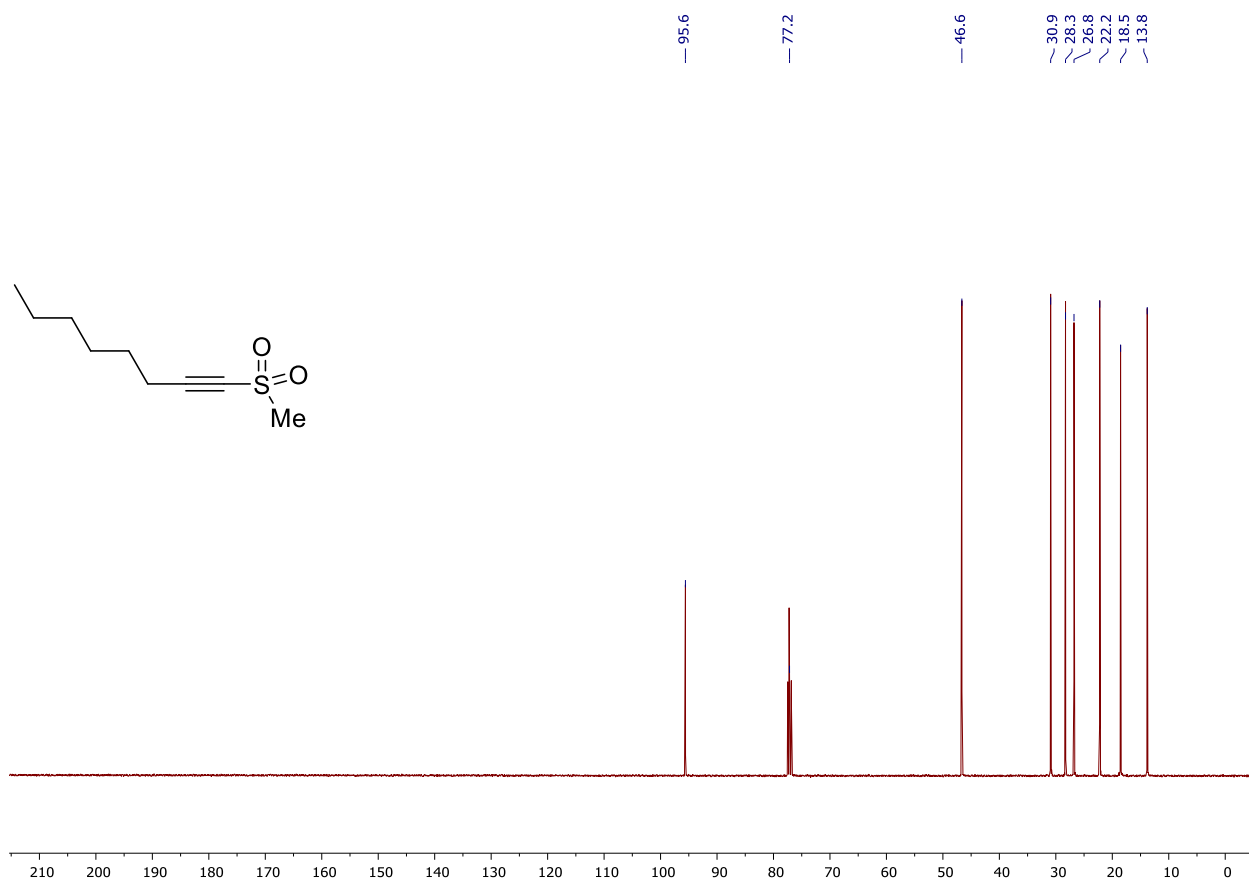

$^1\text{H}$  NMR (400 MHz,  $\text{CDCl}_3$ ) of **1h**

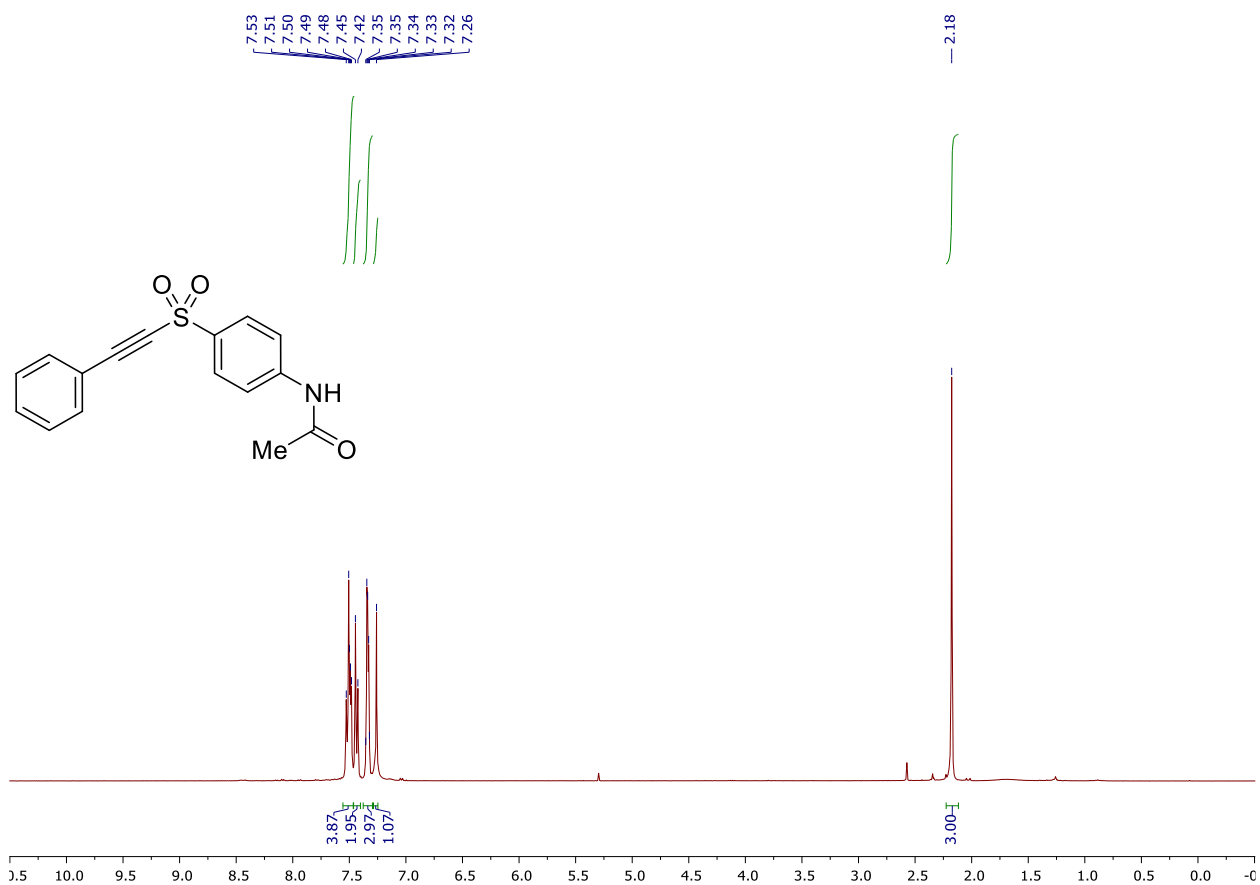

$^{13}\text{C}\{^1\text{H}\}$  NMR (100 MHz,  $\text{CDCl}_3$ ) of **1h**

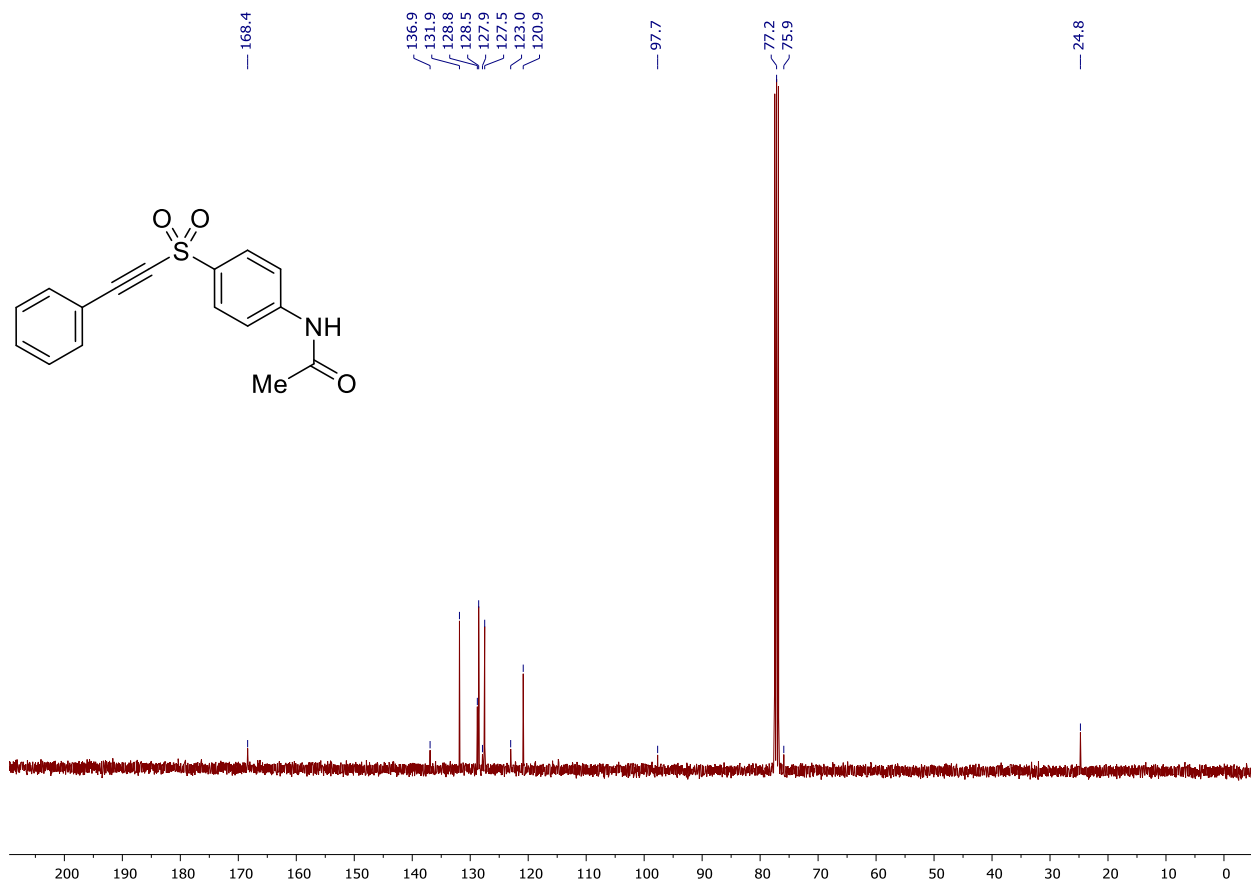



$^1\text{H}$  NMR (400 MHz,  $\text{CDCl}_3$ ) of **1q**

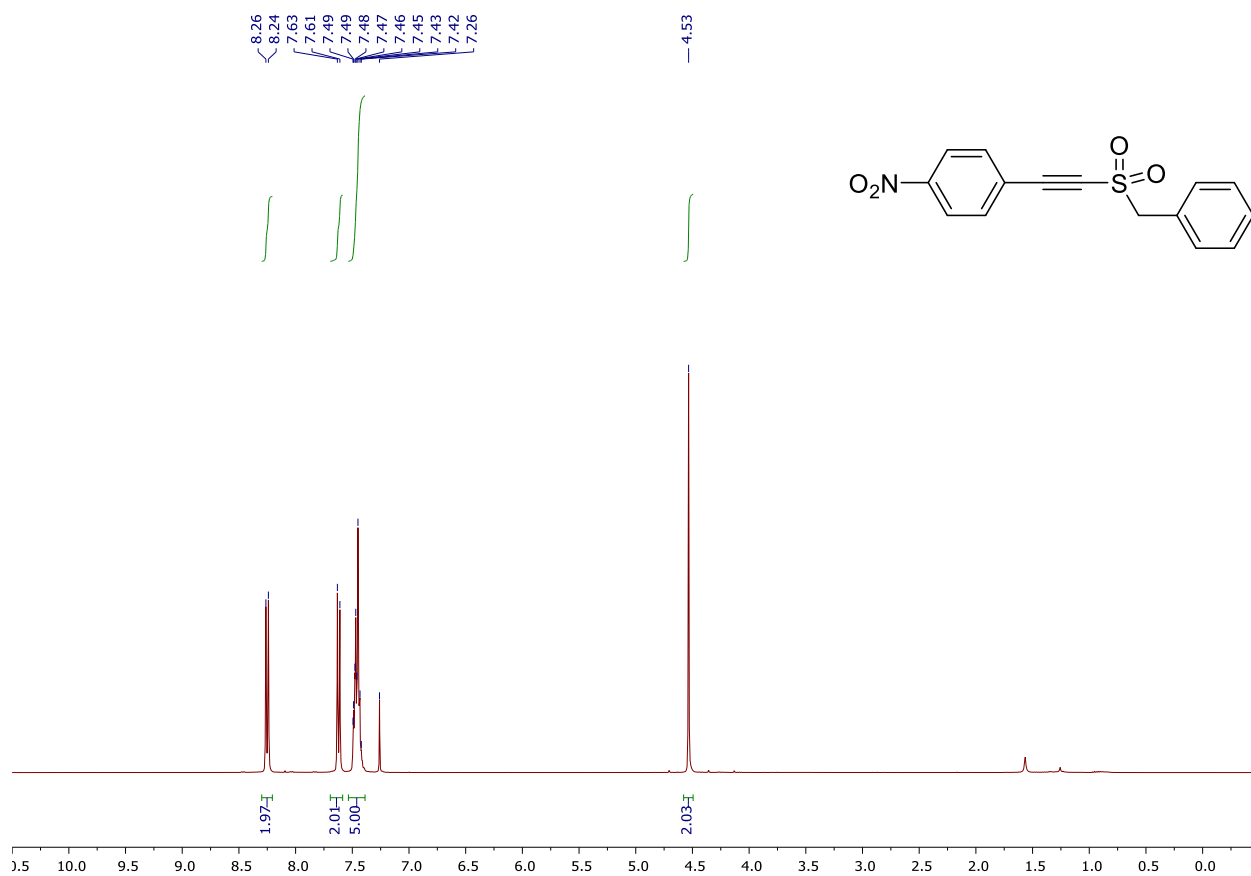

$^{13}\text{C}\{^1\text{H}\}$  NMR (100 MHz,  $\text{CDCl}_3$ ) of **1q**

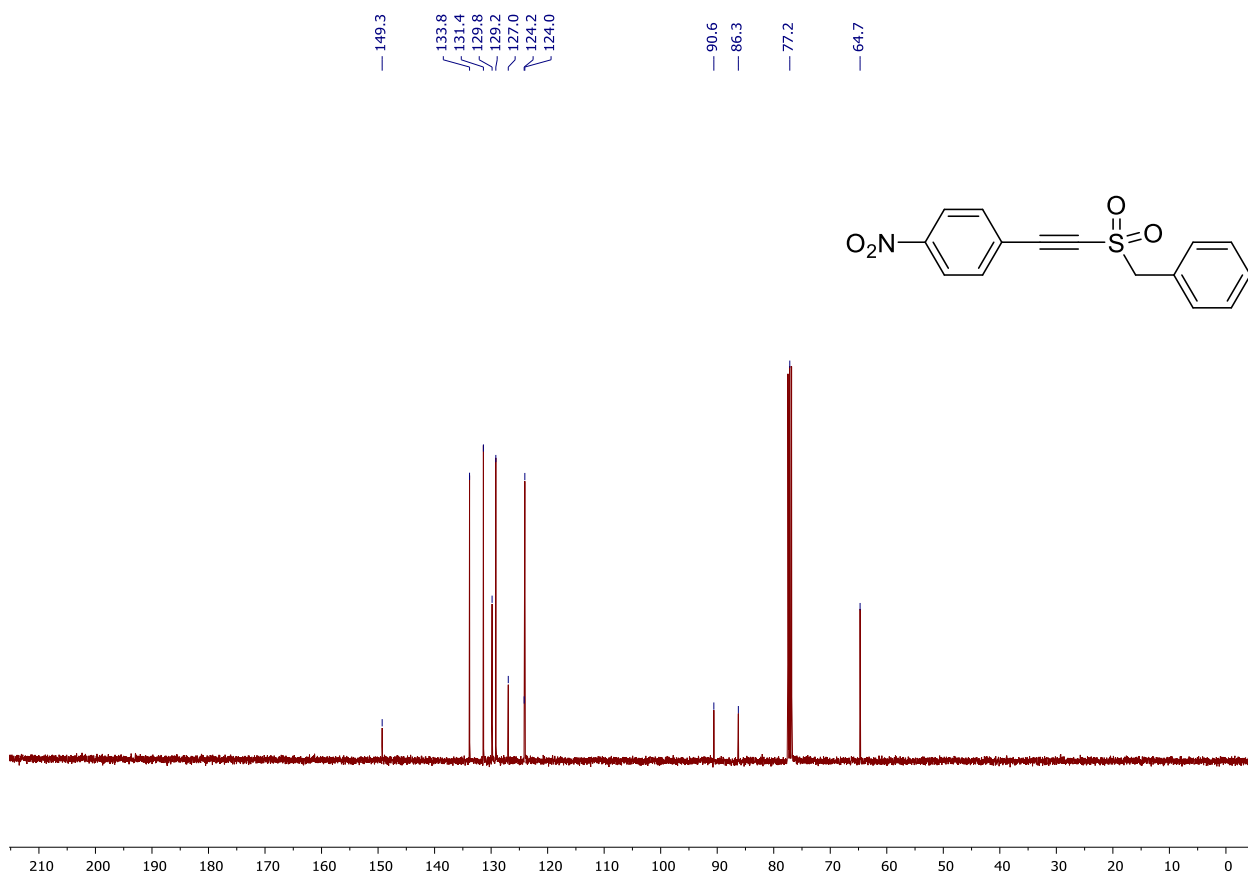

$^1\text{H}$  NMR (400 MHz,  $\text{CDCl}_3$ ) of **1r**

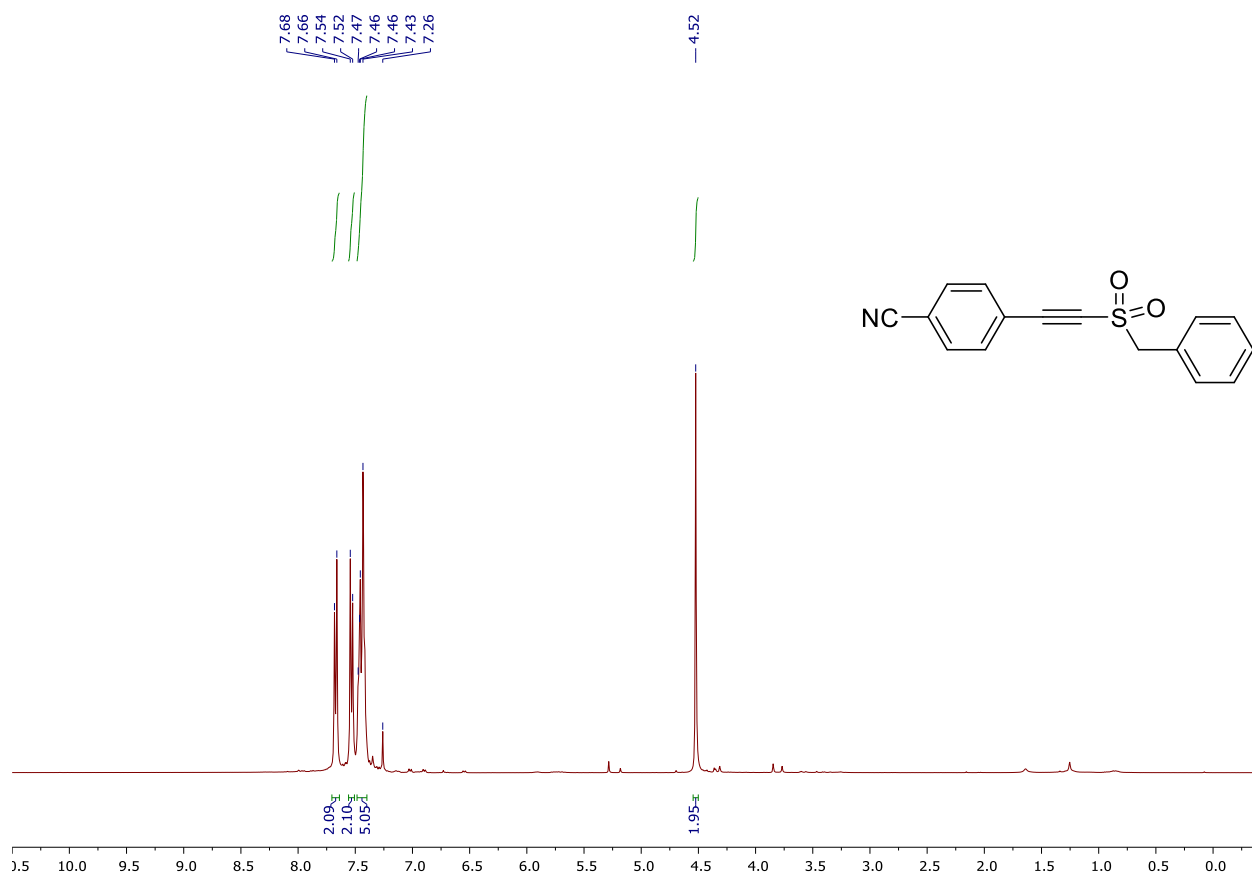

$^{13}\text{C}\{^1\text{H}\}$  NMR (100 MHz,  $\text{CDCl}_3$ ) of **1r**

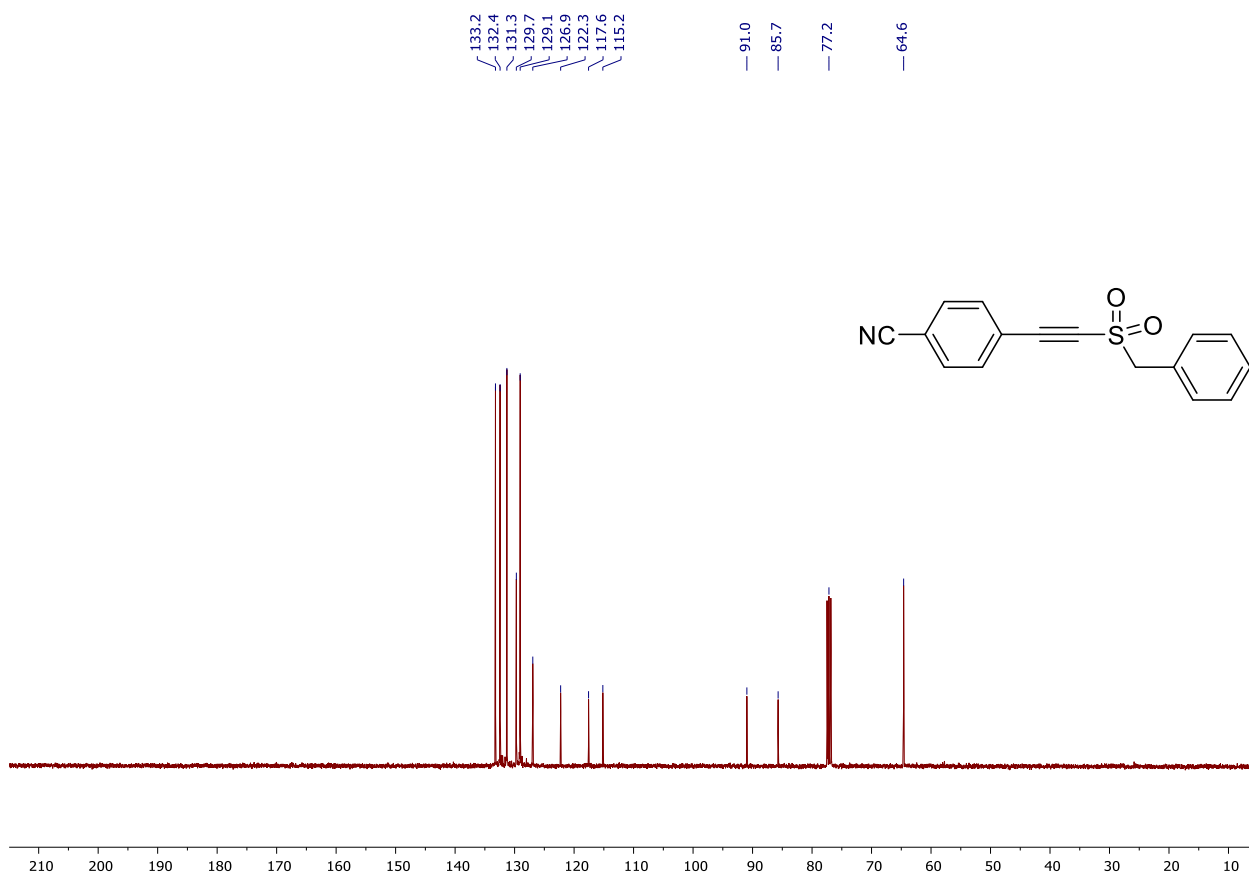

$^1\text{H}$  NMR (400 MHz,  $\text{CDCl}_3$ ) of **1s**

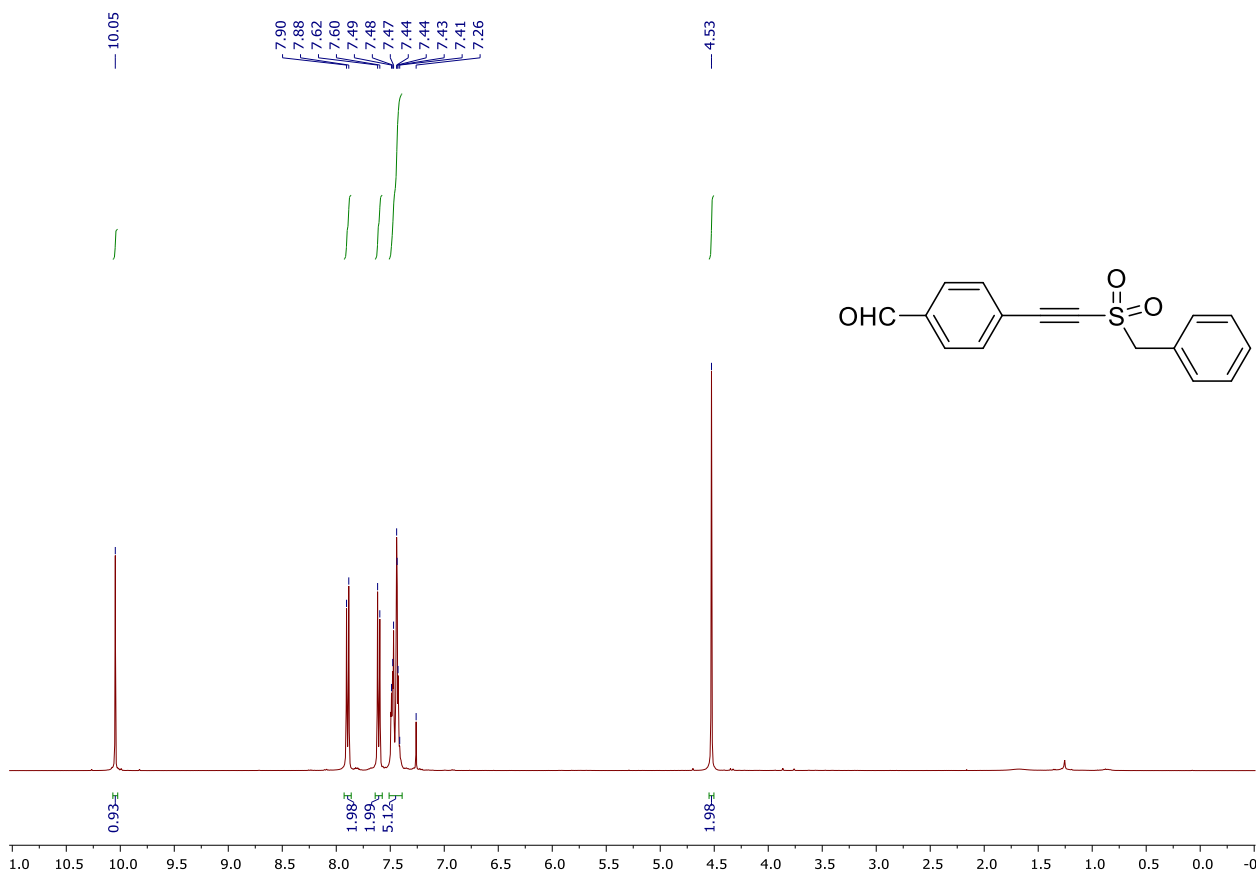

$^{13}\text{C}\{^1\text{H}\}$  NMR (100 MHz,  $\text{CDCl}_3$ ) of **1s**

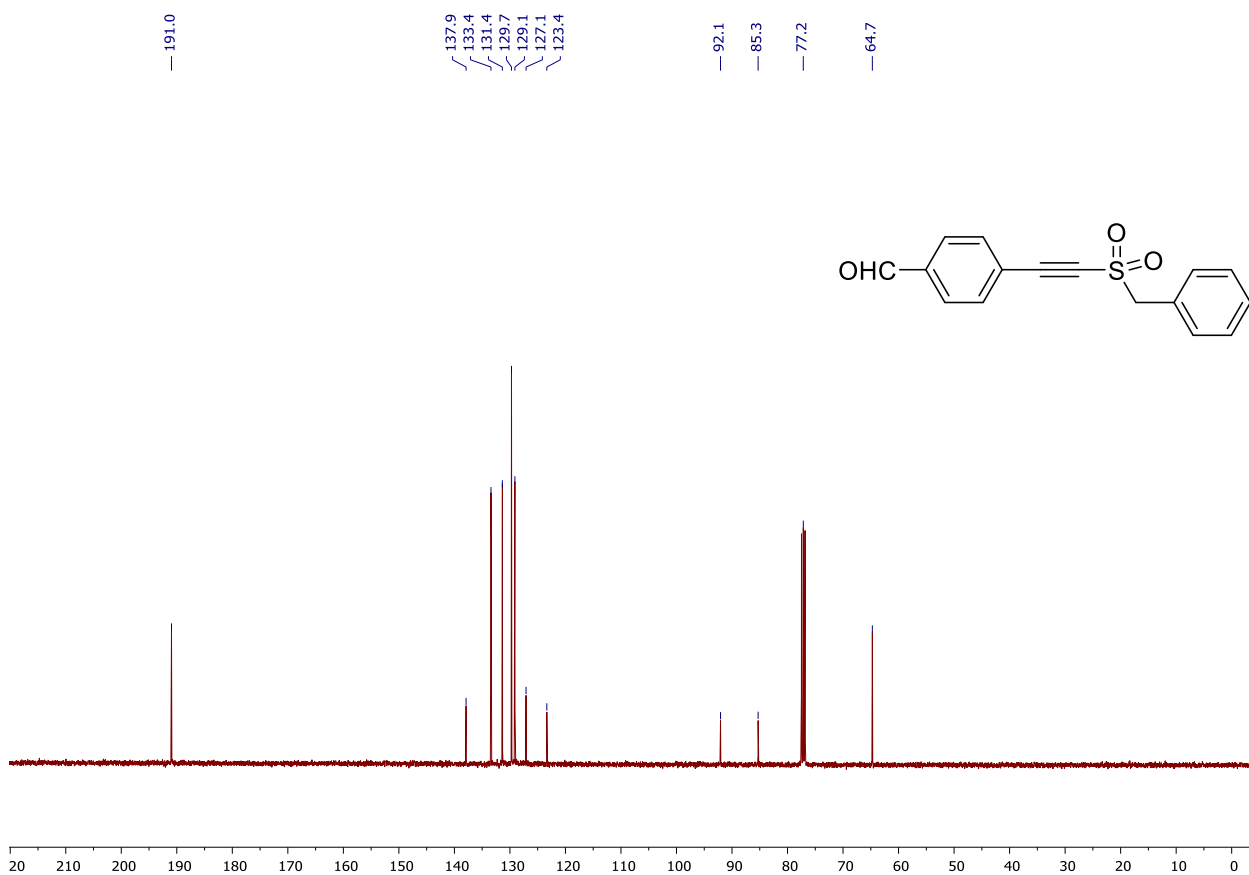

<sup>1</sup>H NMR (400 MHz, CDCl<sub>3</sub>) of **1aa**

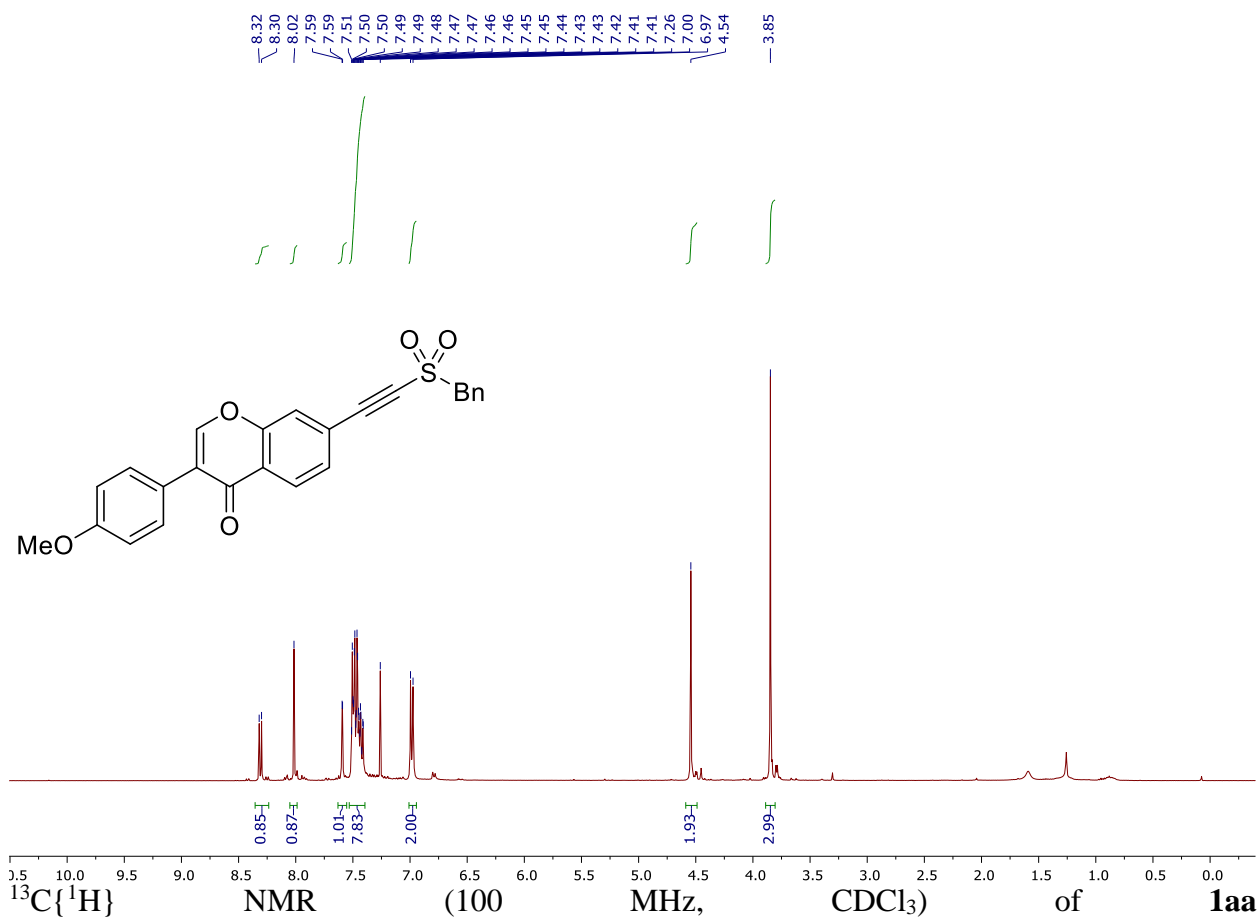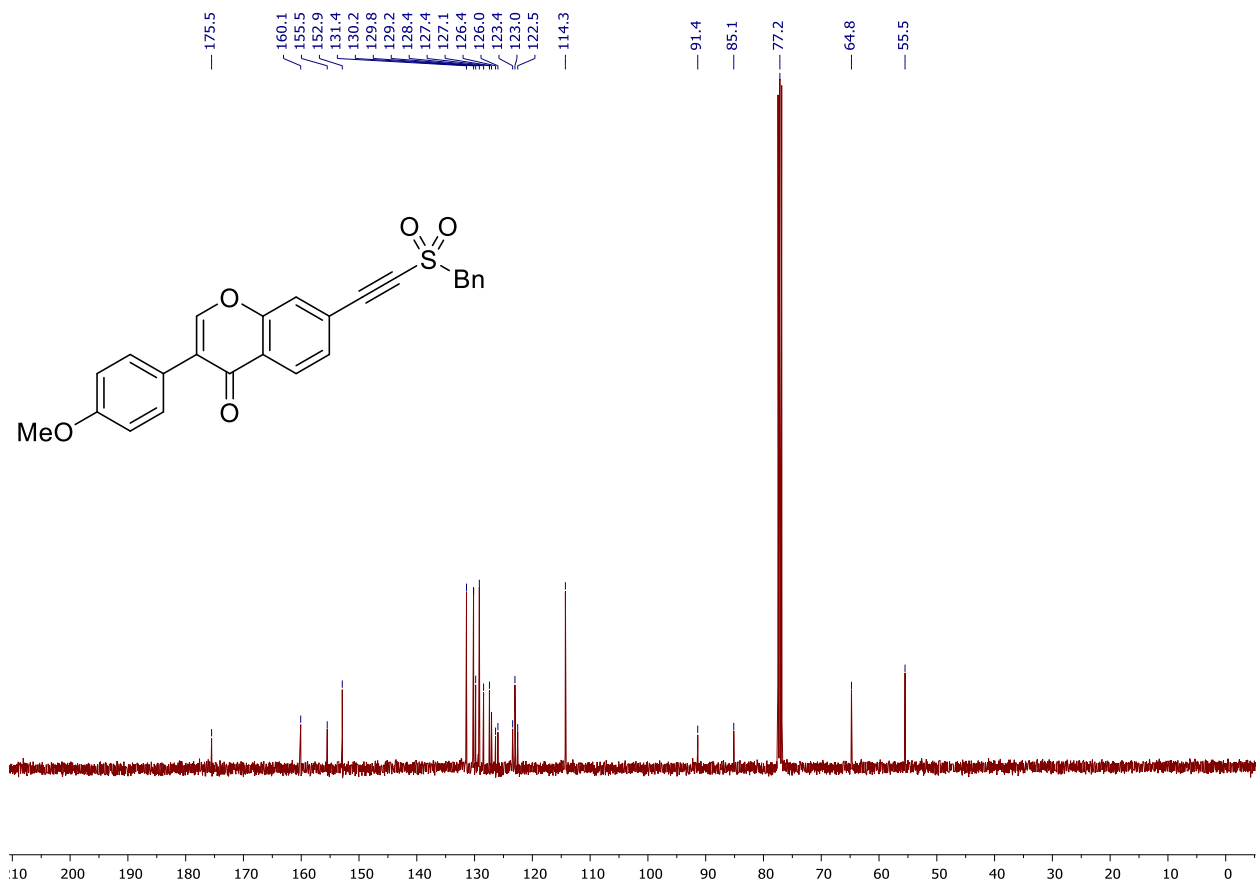

$^1\text{H}$  NMR (400 MHz,  $\text{CDCl}_3$ ) of **1ab**

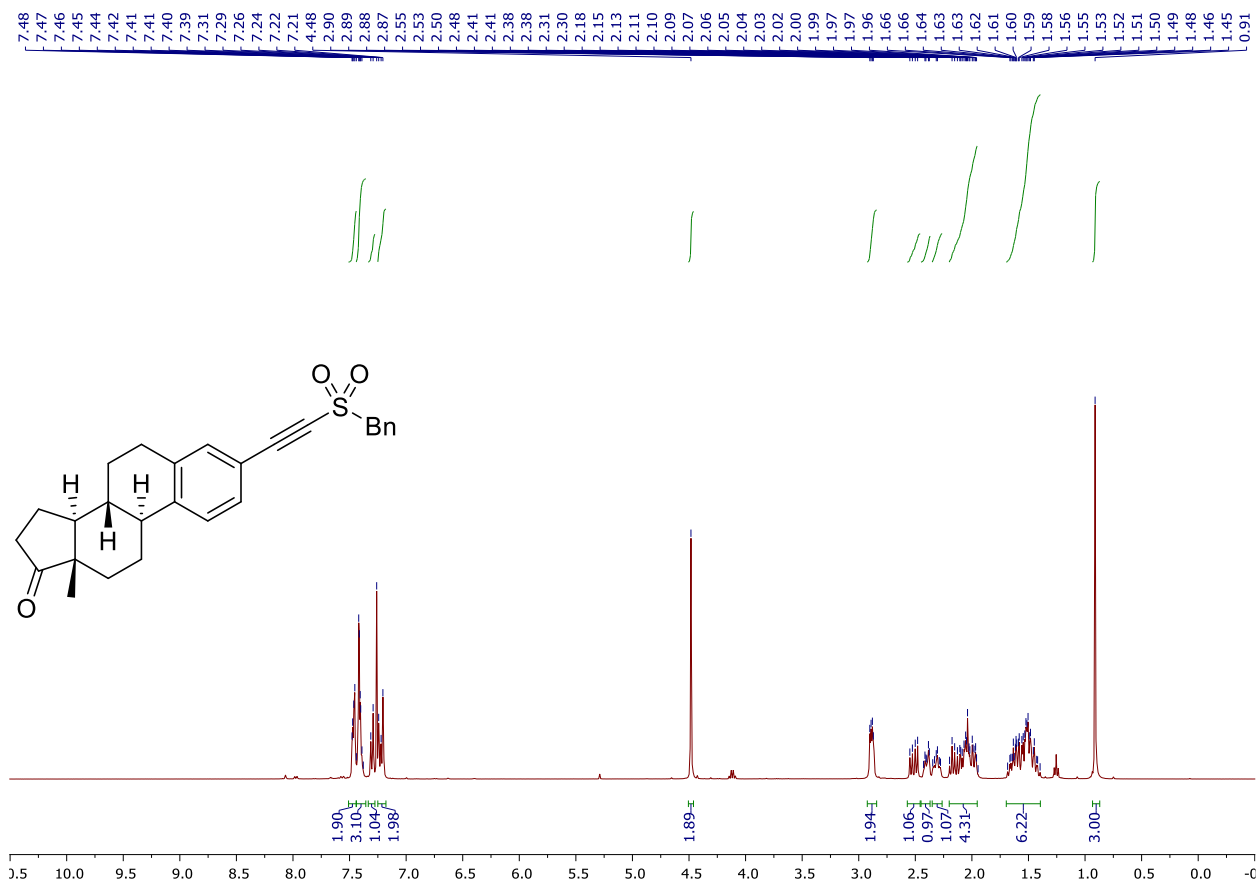

$^{13}\text{C}\{^1\text{H}\}$  NMR (100 MHz,  $\text{CDCl}_3$ ) of **1ab**

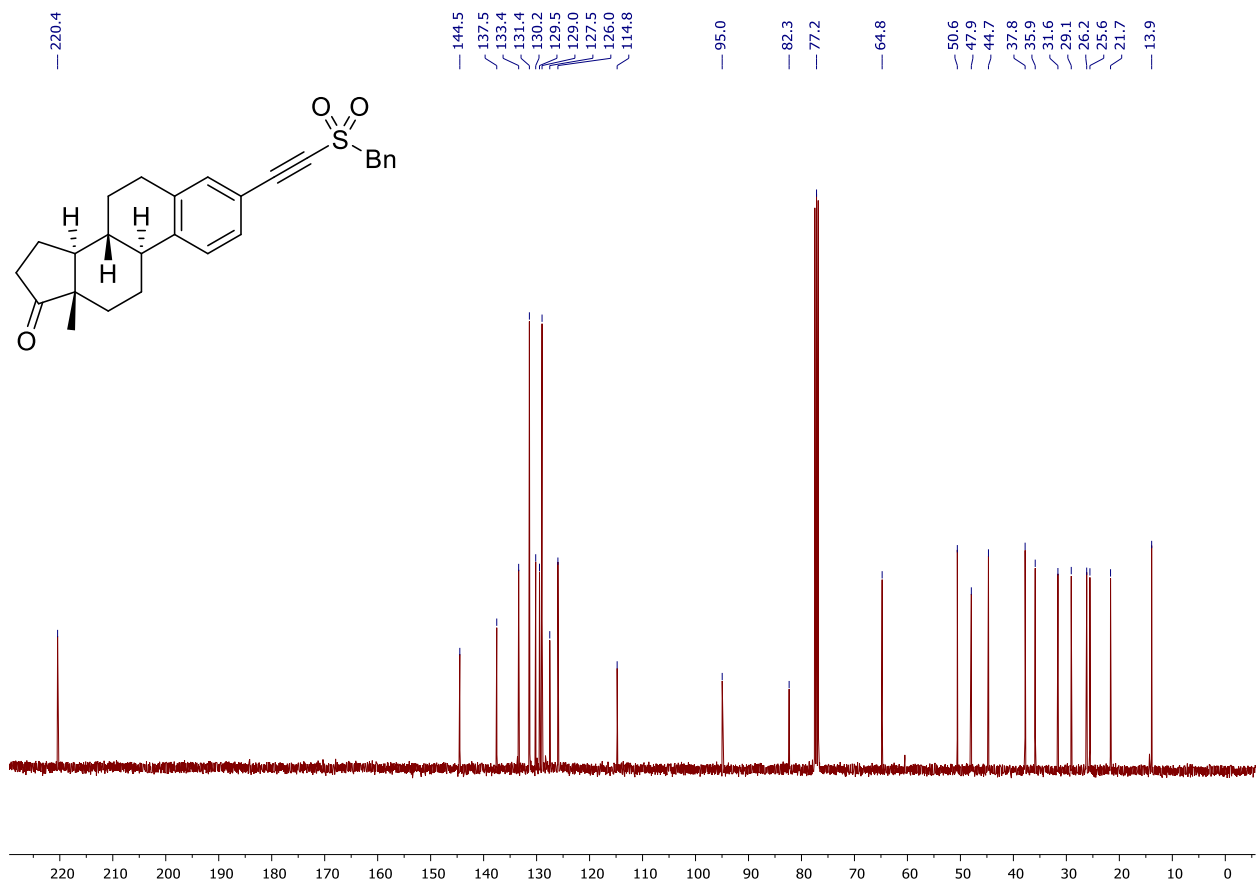

$^1\text{H}$  NMR (400 MHz,  $\text{DMSO-}d_6$ ) of **1ad**

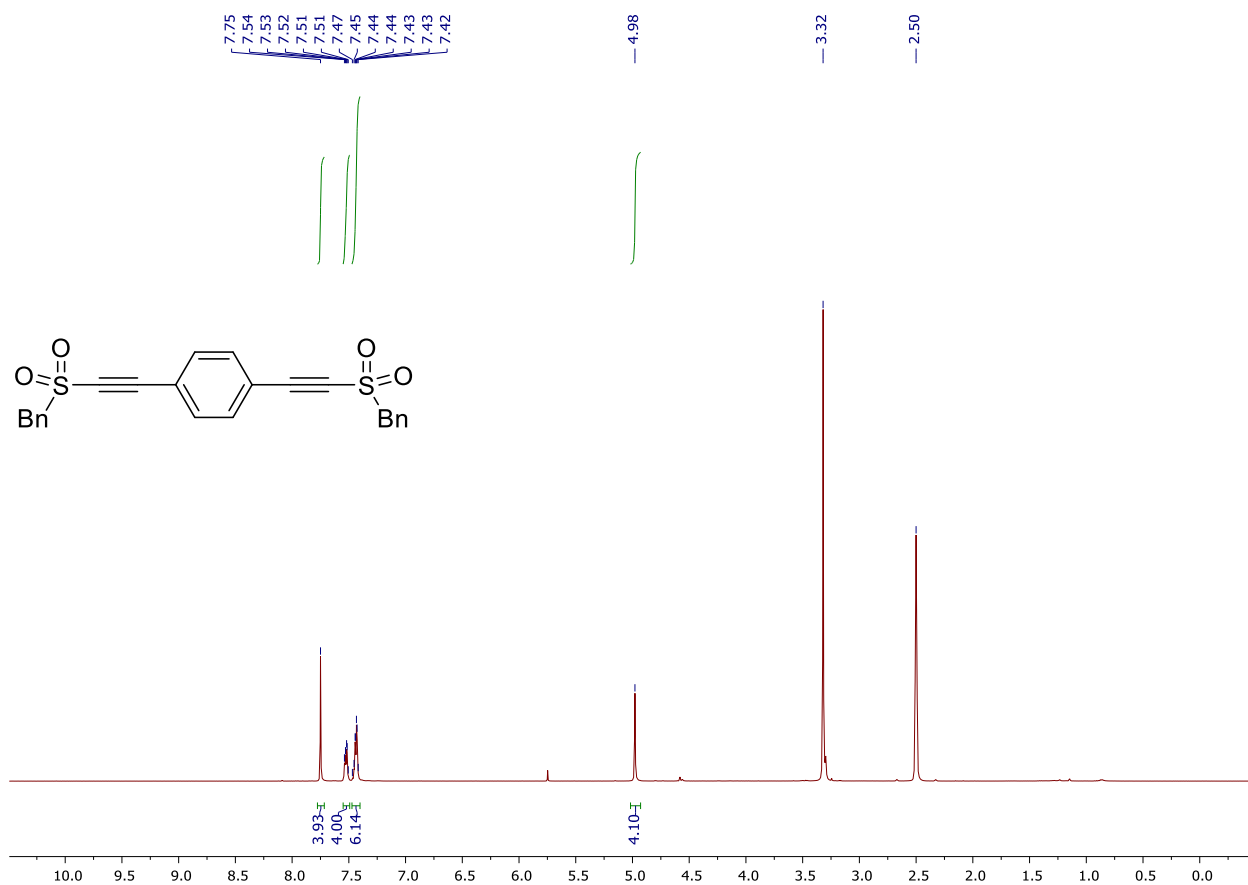

$^{13}\text{C}\{^1\text{H}\}$  NMR (100 MHz,  $\text{DMSO-}d_6$ ) of **1ad**

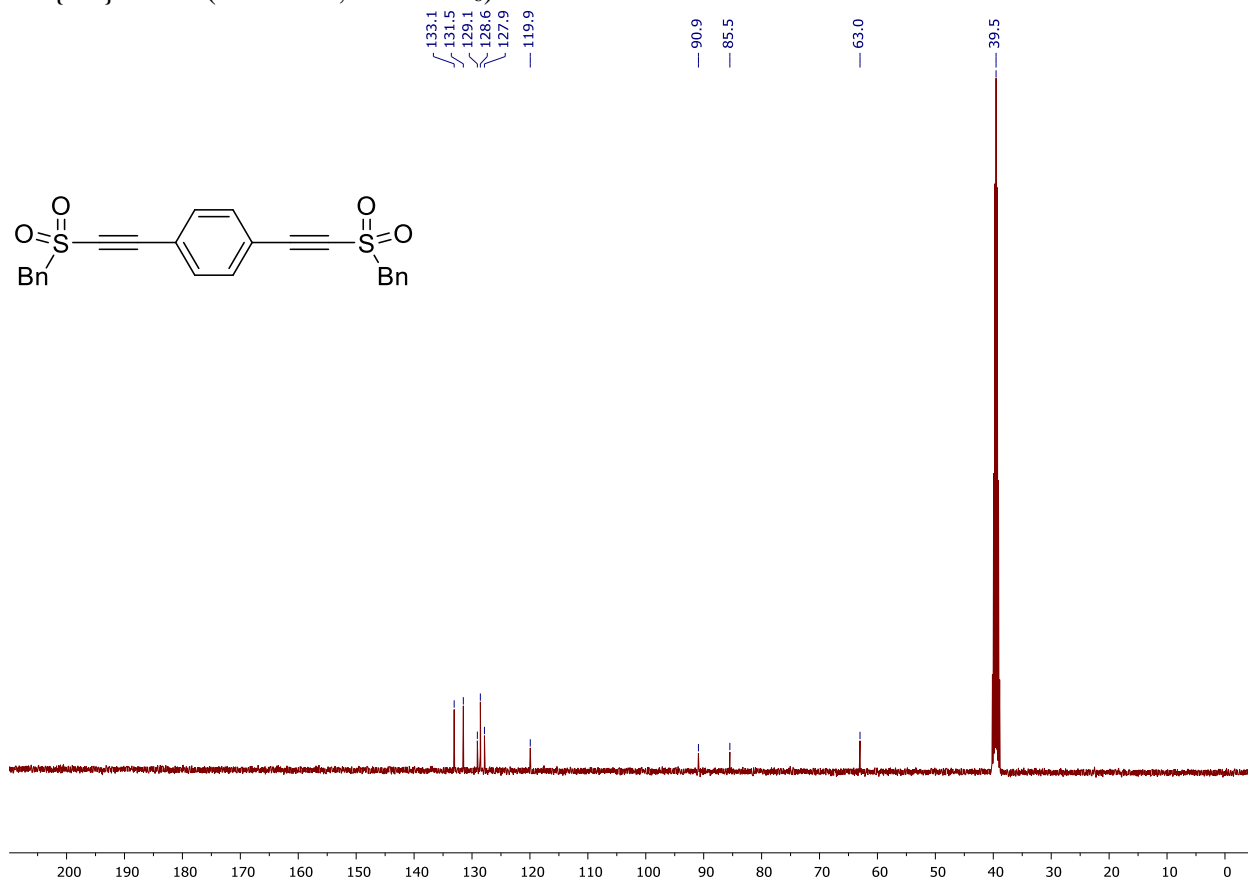

$^1\text{H}$  NMR (400 MHz,  $\text{CDCl}_3$ ) of **2a**

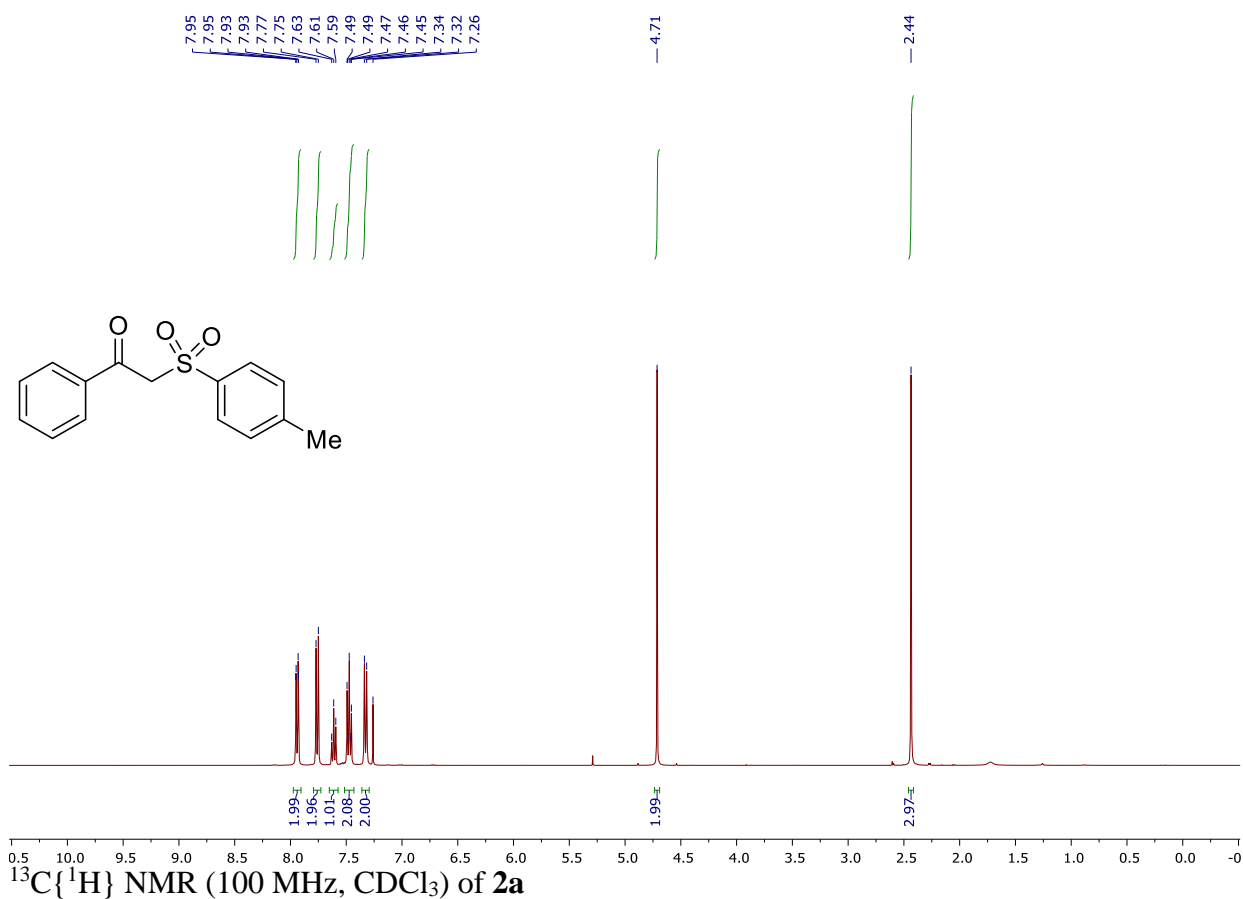

$^{13}\text{C}\{^1\text{H}\}$  NMR (100 MHz,  $\text{CDCl}_3$ ) of **2a**

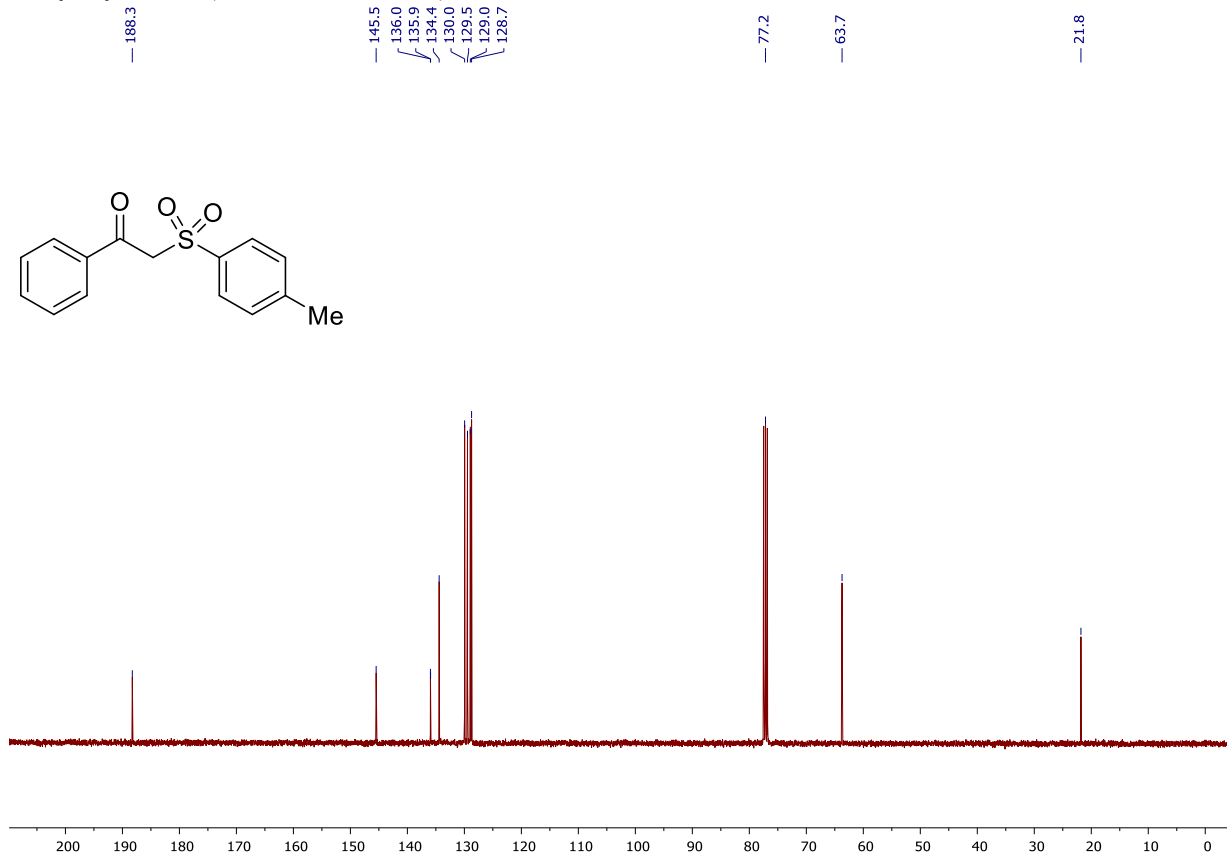

$^1\text{H}$  NMR (400 MHz,  $\text{CDCl}_3$ ) of **2b**

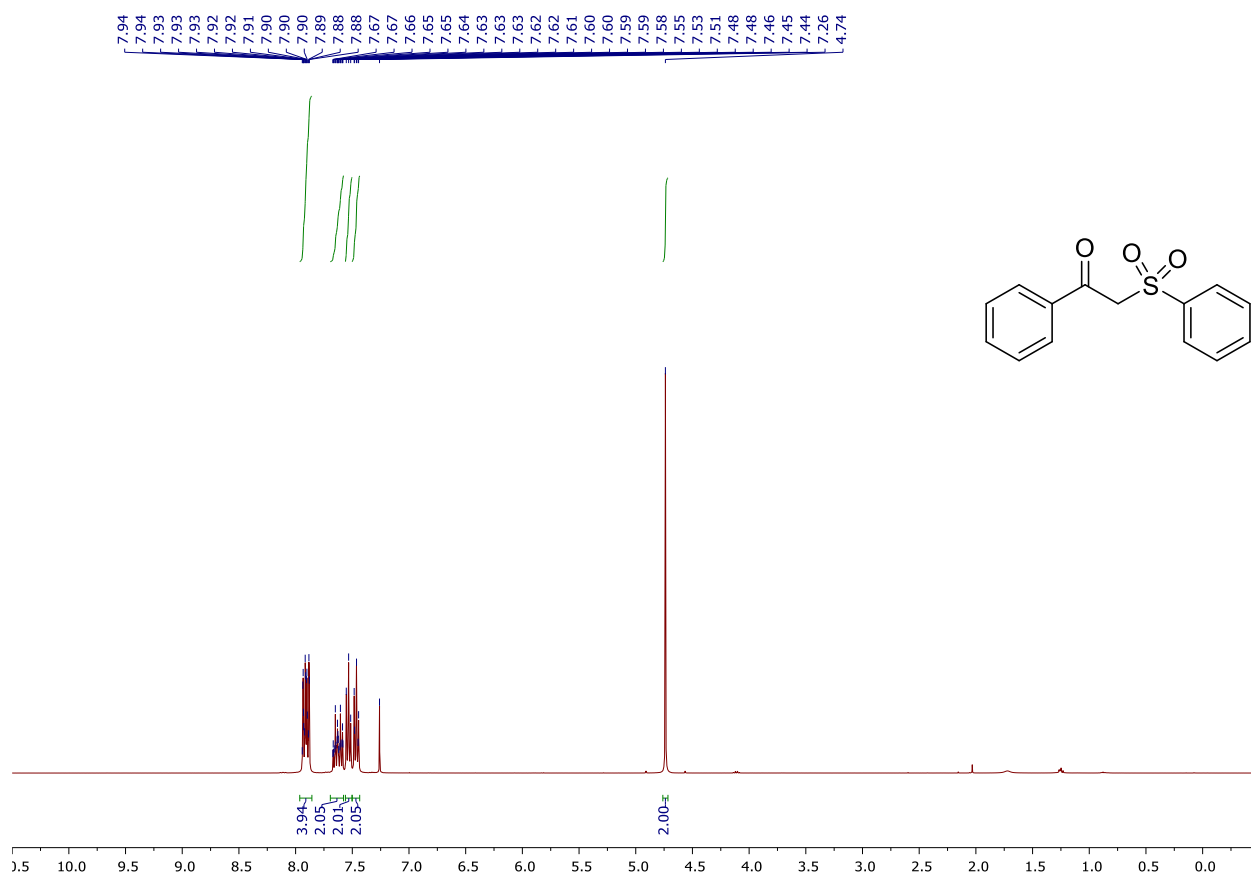

$^{13}\text{C}\{^1\text{H}\}$  NMR (100 MHz,  $\text{CDCl}_3$ ) of **2b**

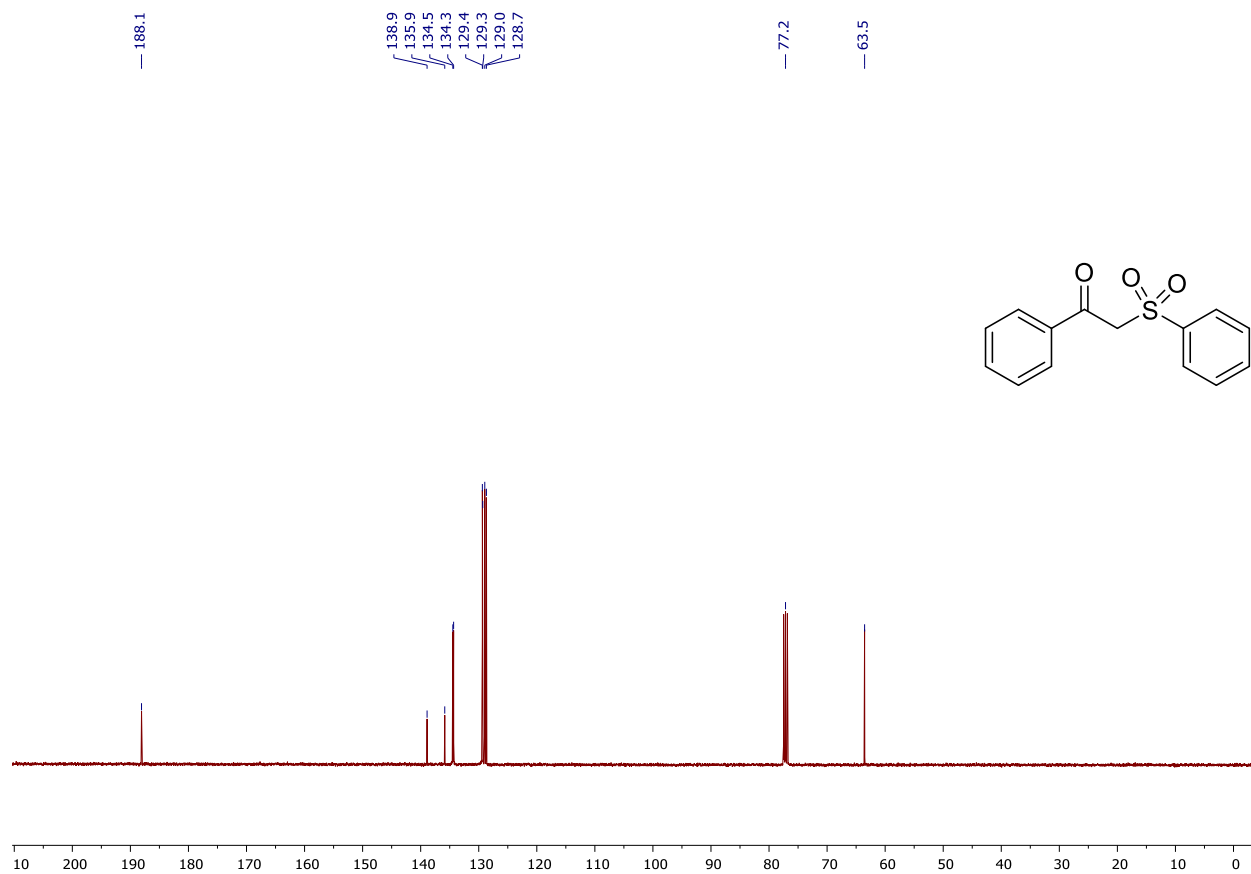



$^1\text{H}$  NMR (400 MHz,  $\text{CDCl}_3$ ) of **2c**

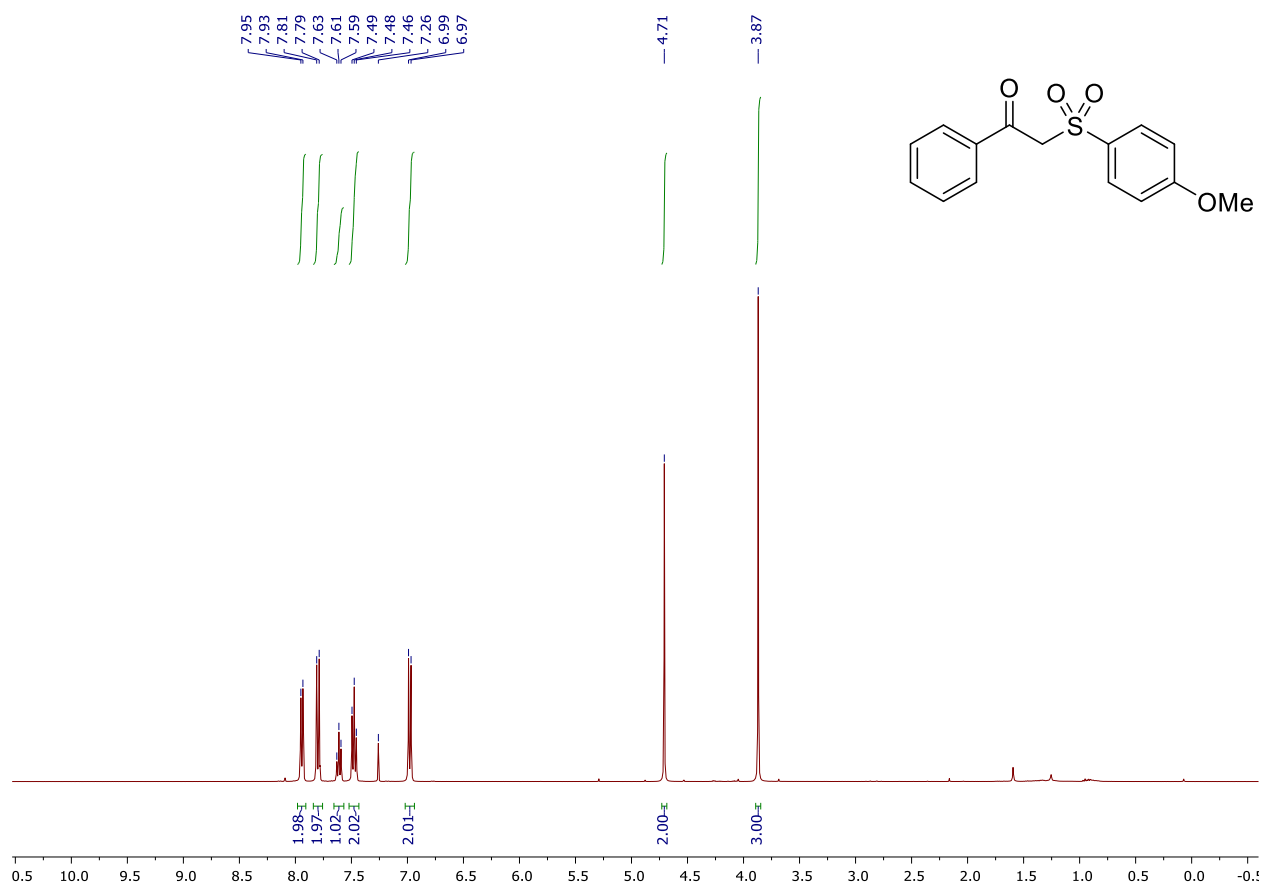

$^{13}\text{C}\{^1\text{H}\}$  NMR (100 MHz,  $\text{CDCl}_3$ ) of **2c**

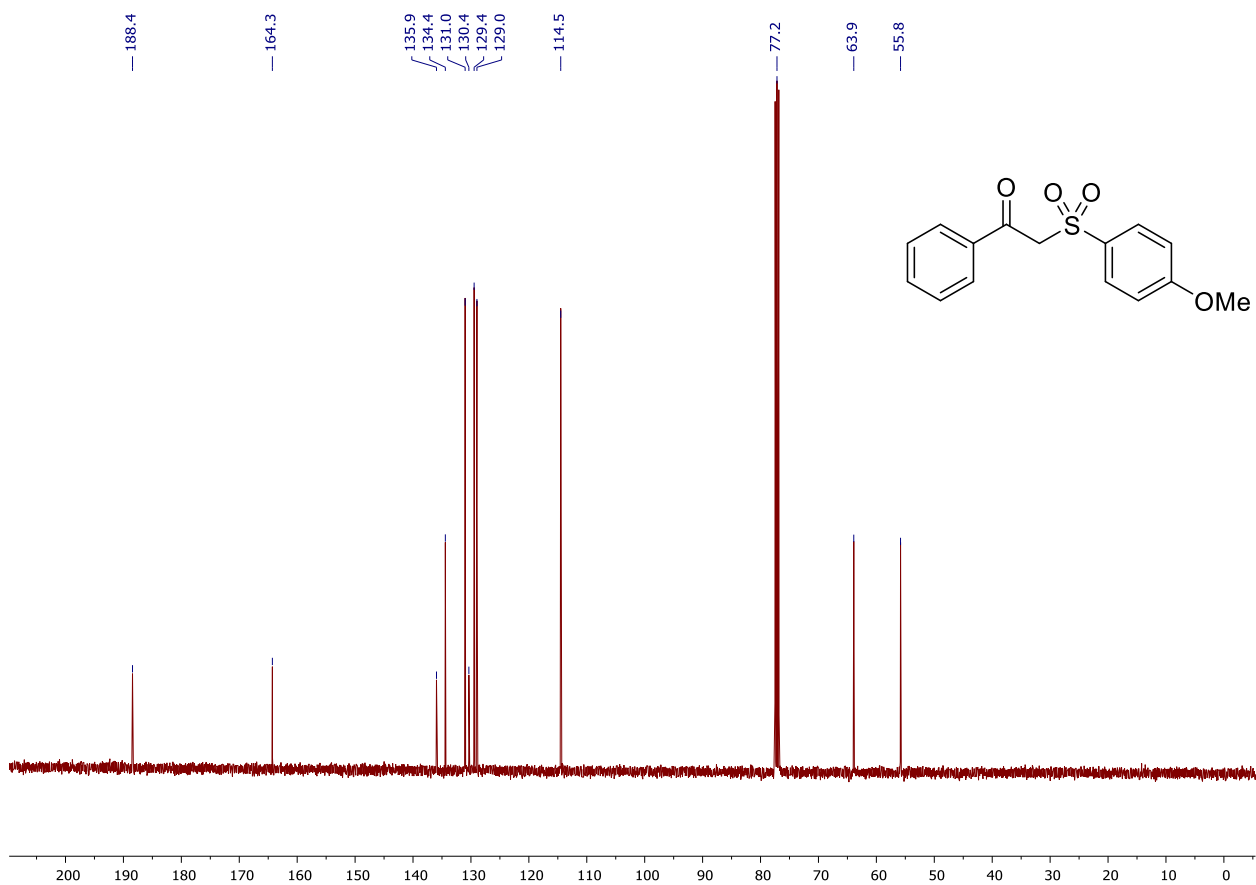

$^1\text{H}$  NMR (400 MHz,  $\text{CDCl}_3$ ) of **2d**

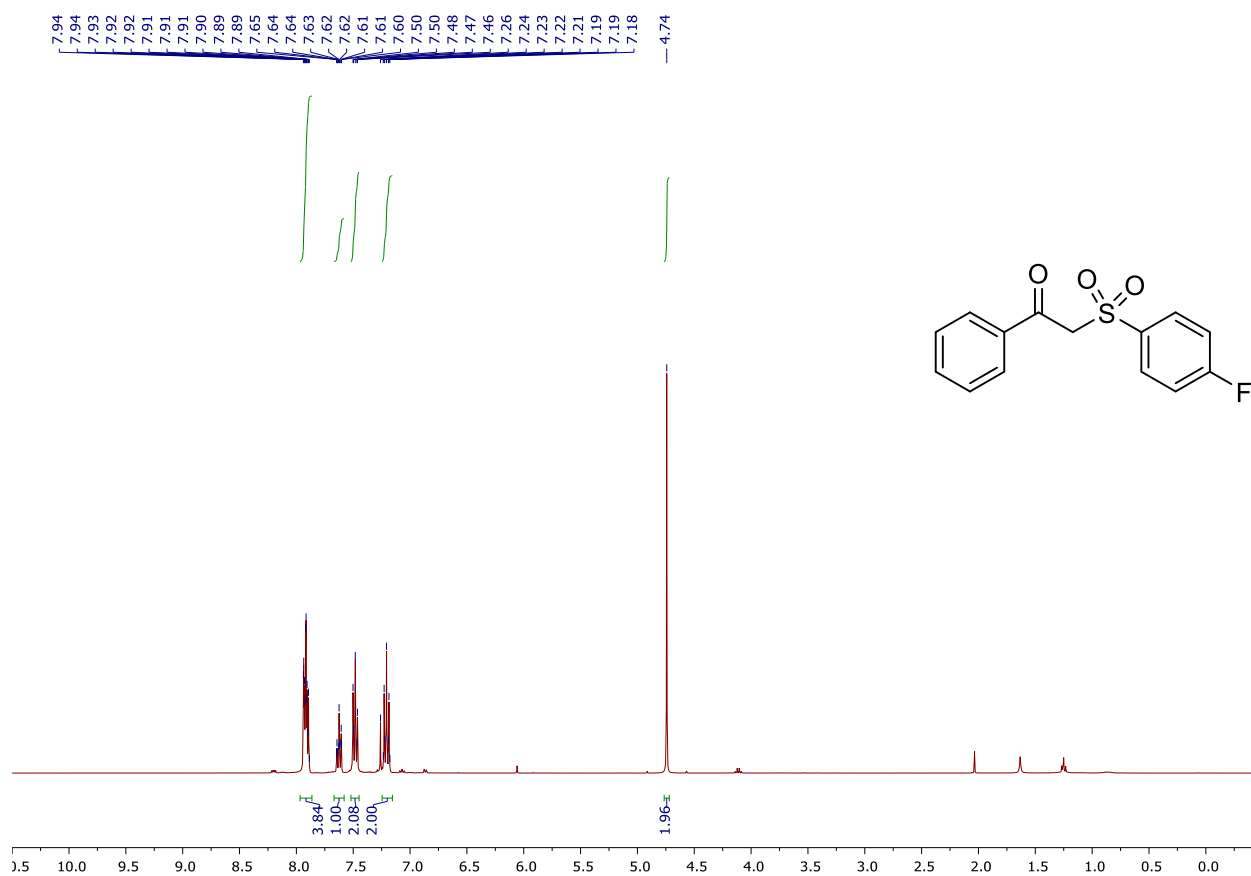

$^{13}\text{C}\{^1\text{H}\}$  NMR (100 MHz,  $\text{CDCl}_3$ ) of **2d**

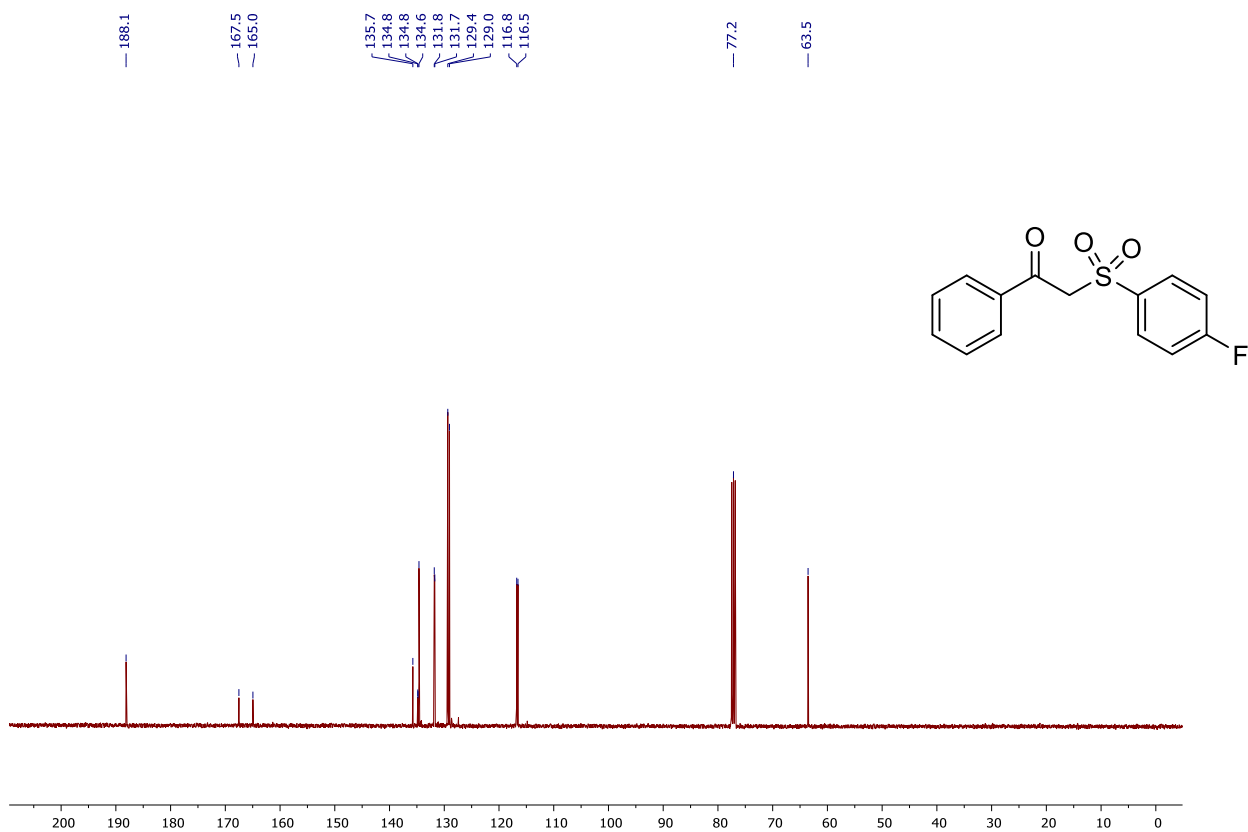

$^1\text{H}$  NMR (400 MHz,  $\text{CDCl}_3$ ) of **2e**

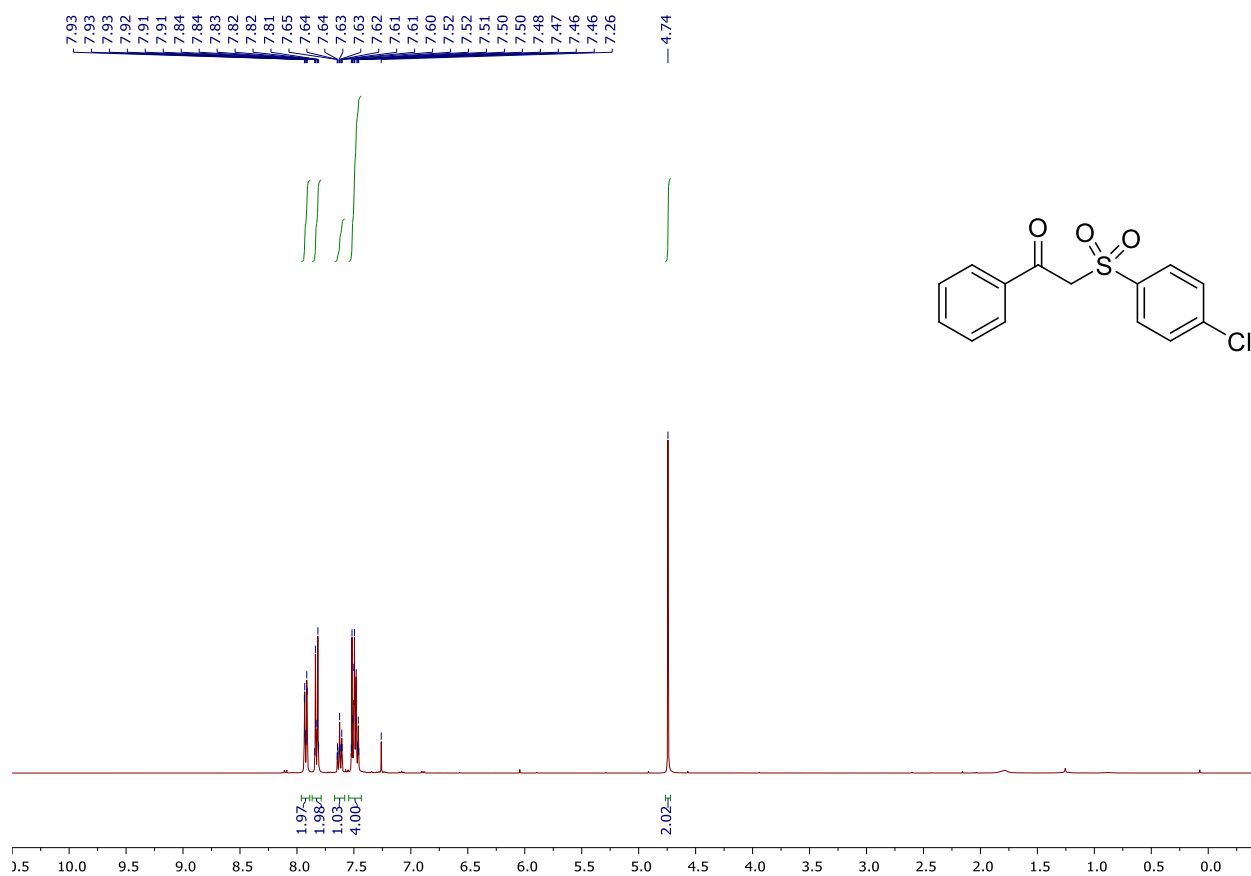

$^{13}\text{C}\{^1\text{H}\}$  NMR (100 MHz,  $\text{CDCl}_3$ ) of **2e**

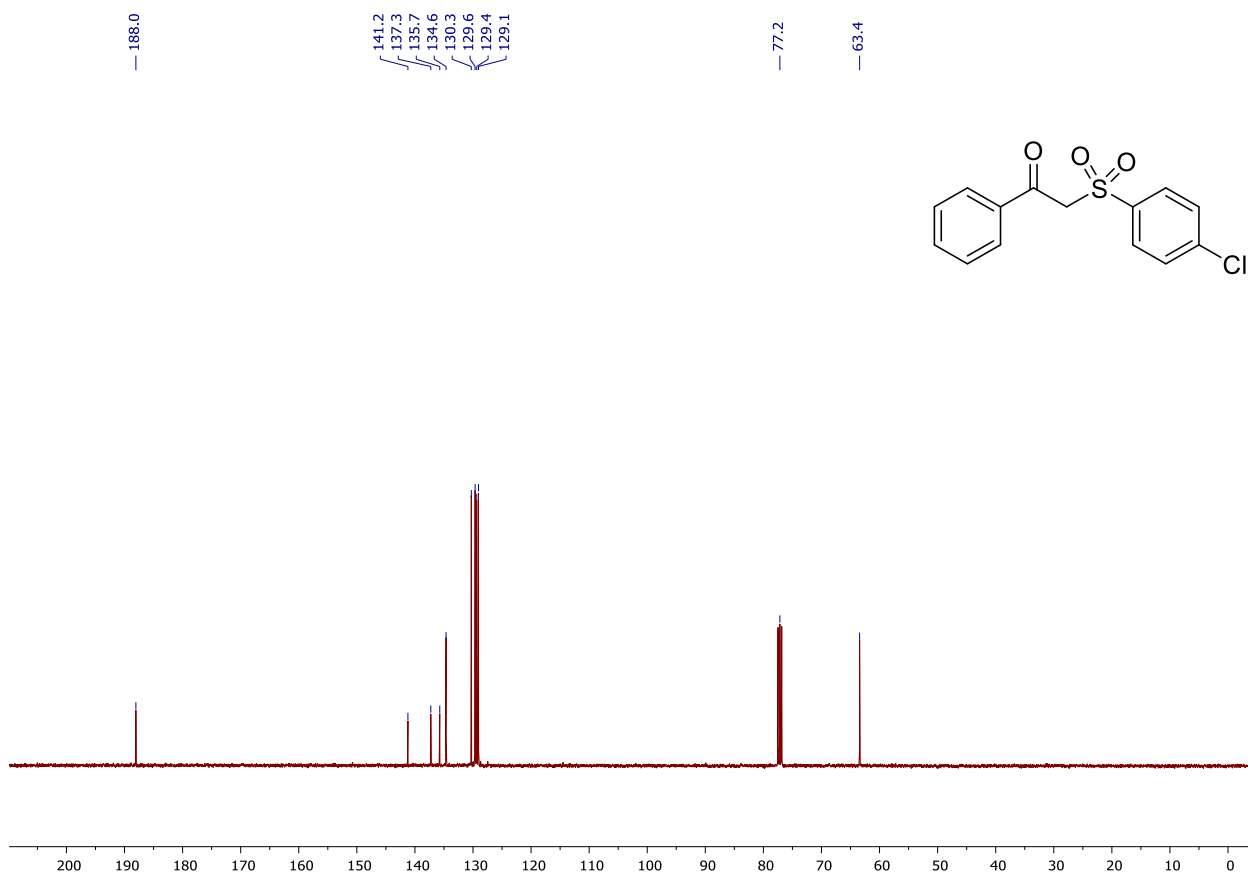

$^1\text{H}$  NMR (400 MHz,  $\text{CDCl}_3$ ) of **2f**

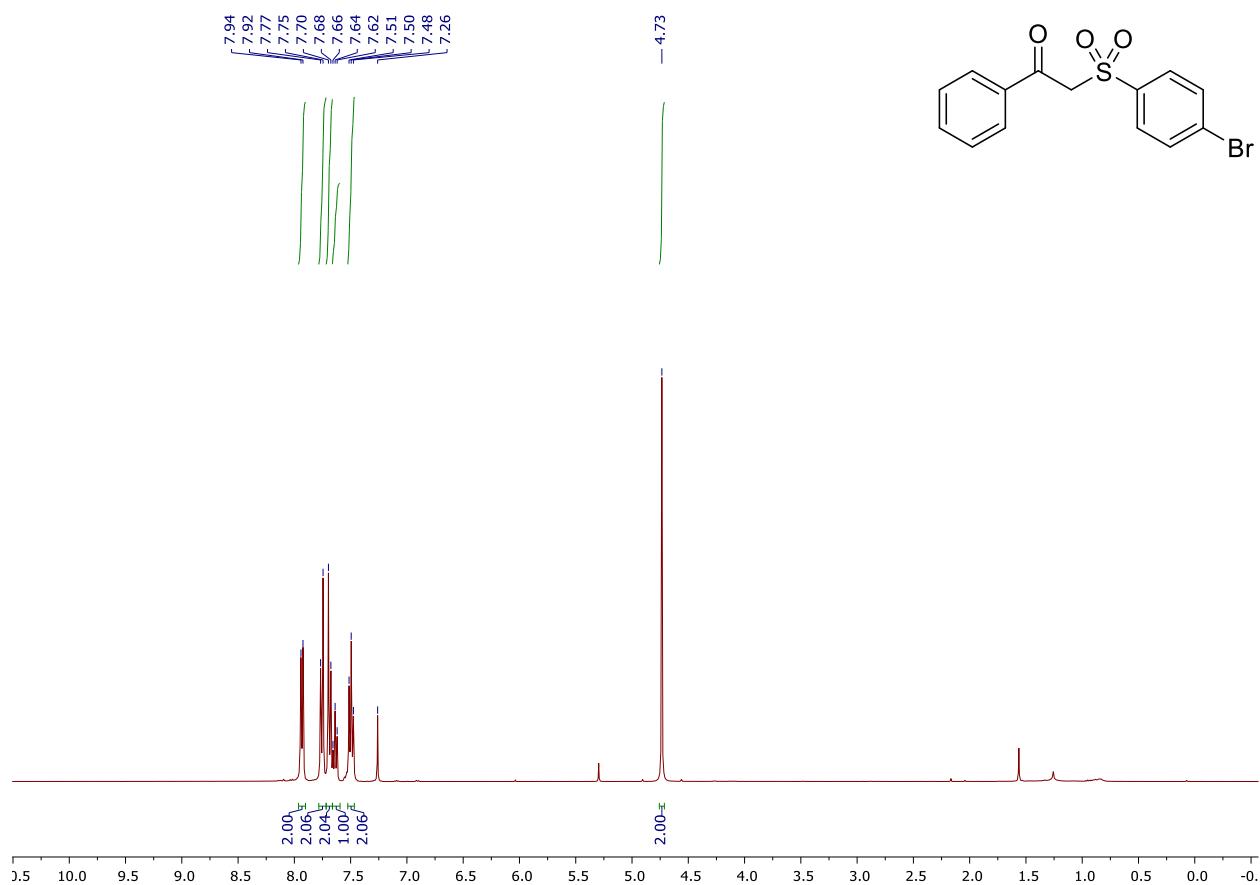

$^{13}\text{C}\{^1\text{H}\}$  NMR (100 MHz,  $\text{CDCl}_3$ ) of **2f**

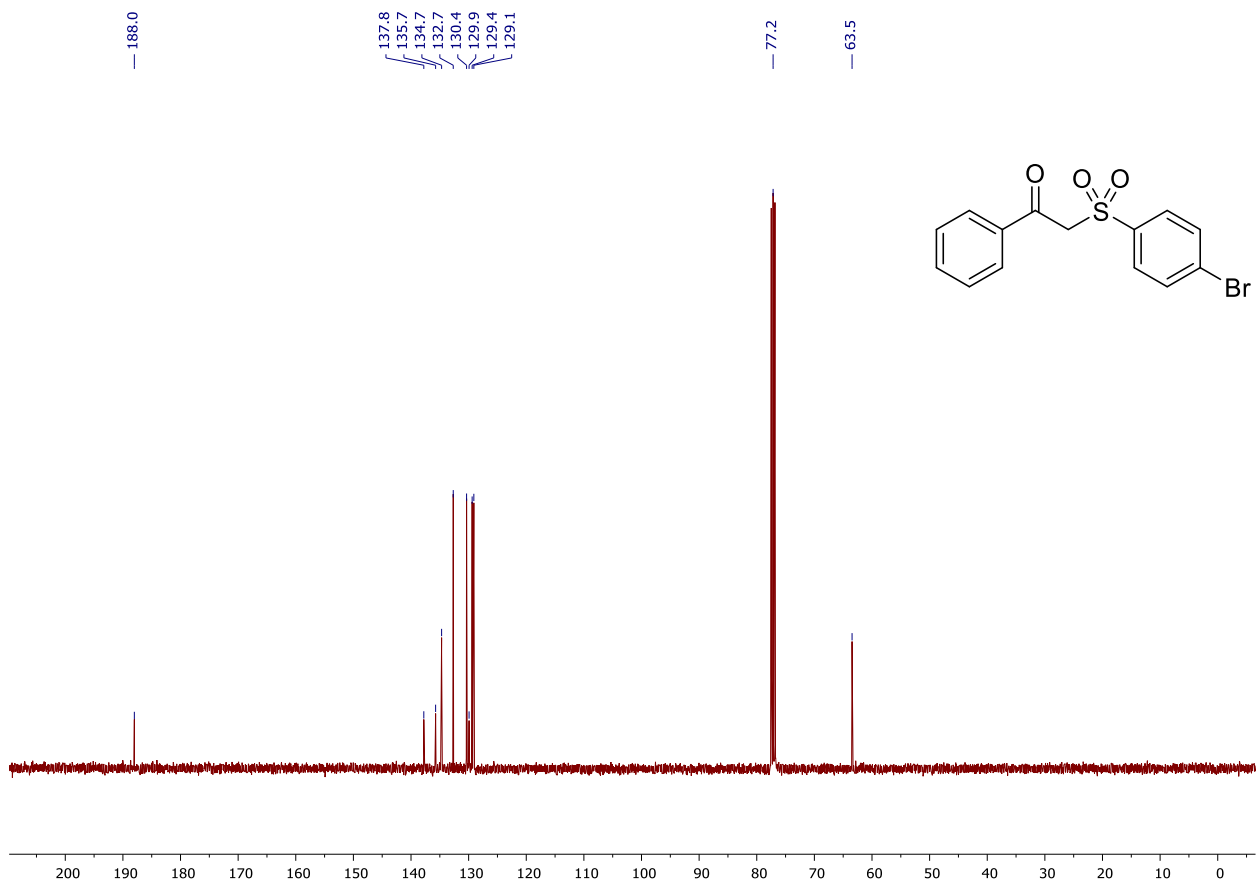

$^1\text{H}$  NMR (400 MHz,  $\text{CDCl}_3$ ) of **2g**

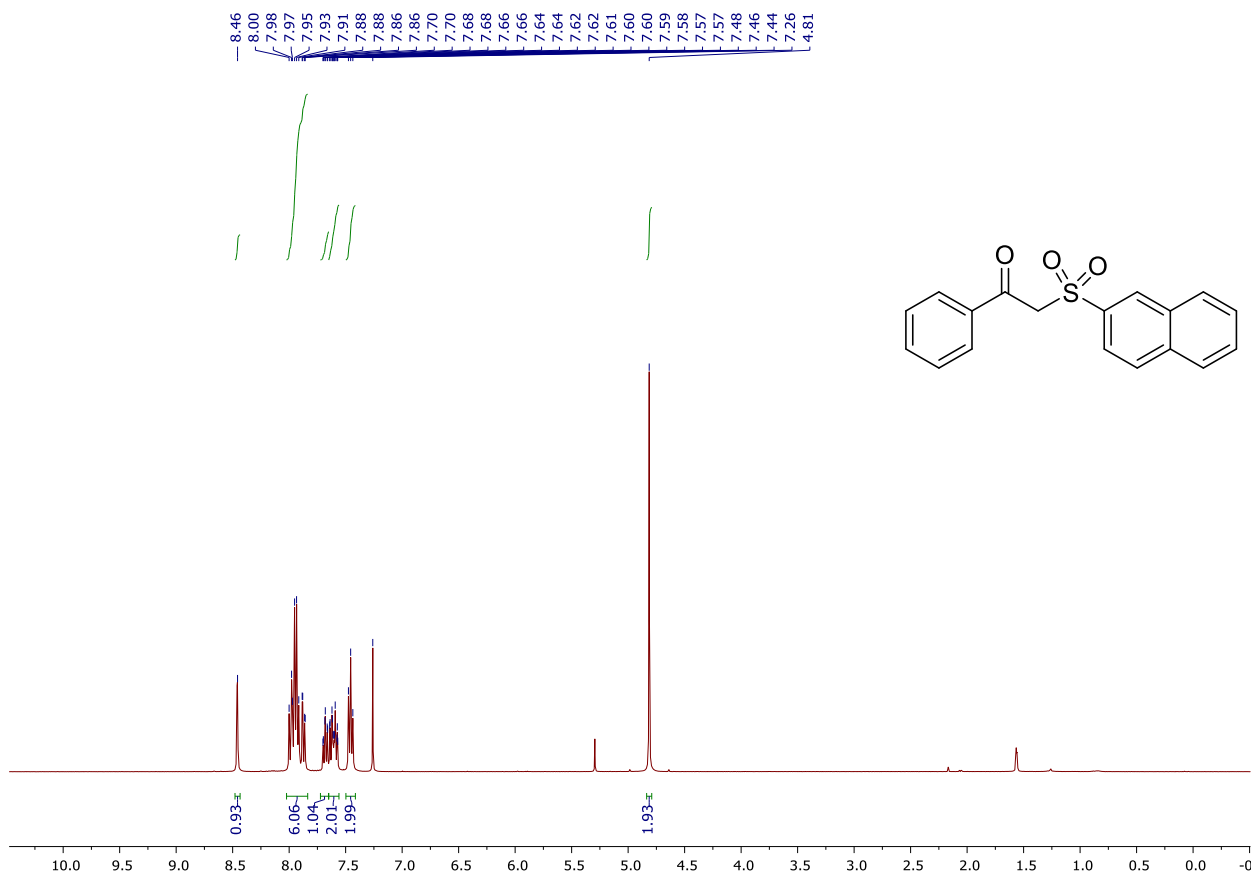

$^{13}\text{C}\{^1\text{H}\}$  NMR (100 MHz,  $\text{CDCl}_3$ ) of **2g**

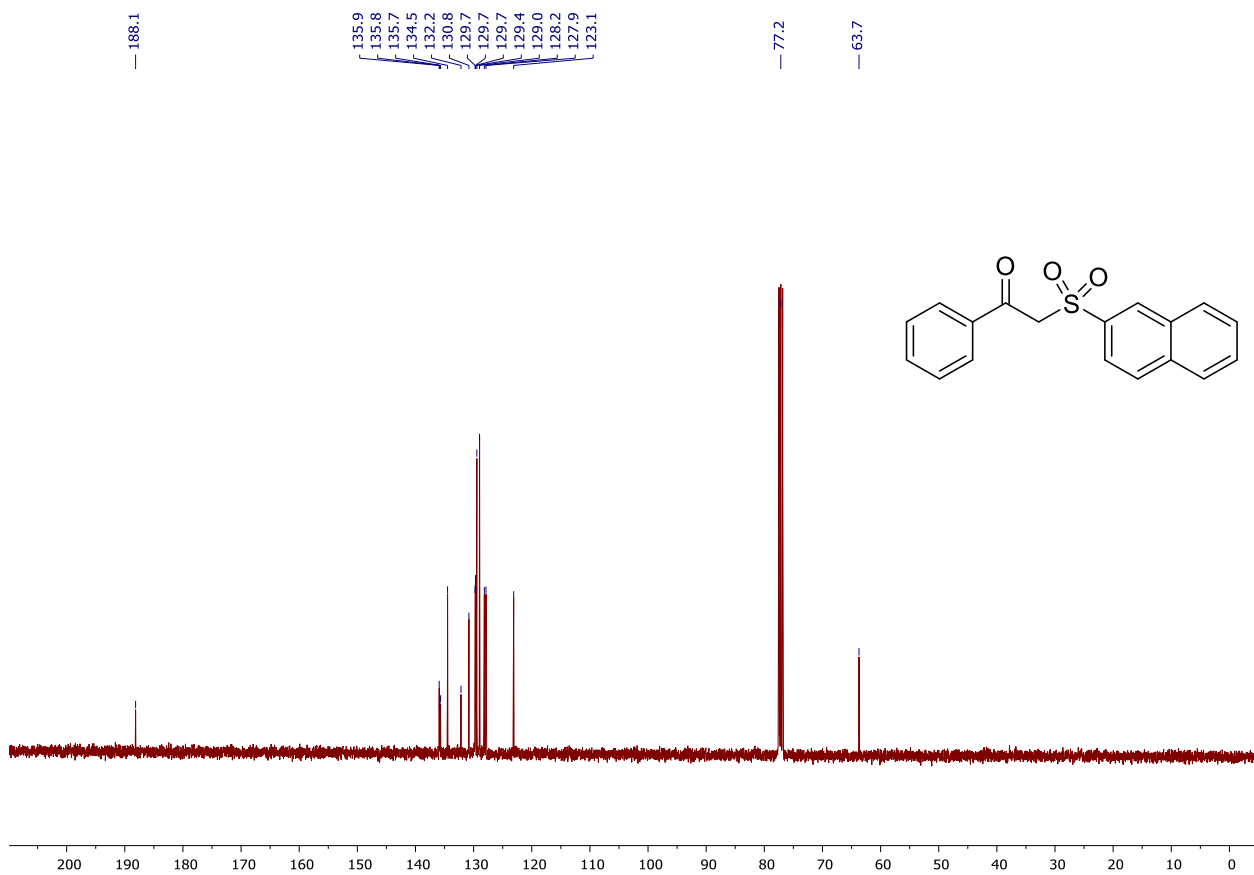

$^1\text{H}$  NMR (400 MHz,  $\text{DMSO-}d_6$ ) of **2h**

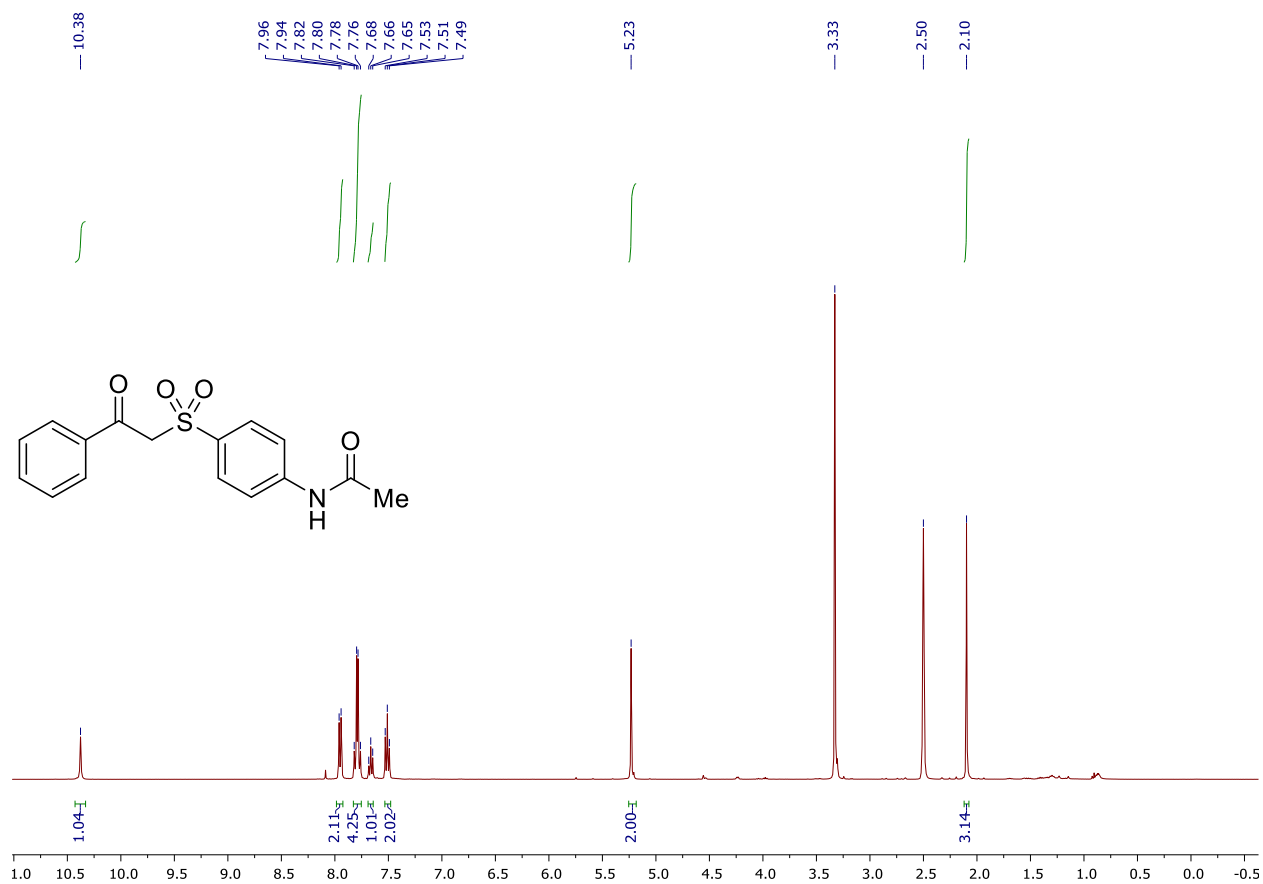

$^{13}\text{C}\{^1\text{H}\}$  NMR (100 MHz,  $\text{DMSO-}d_6$ ) of **2h**

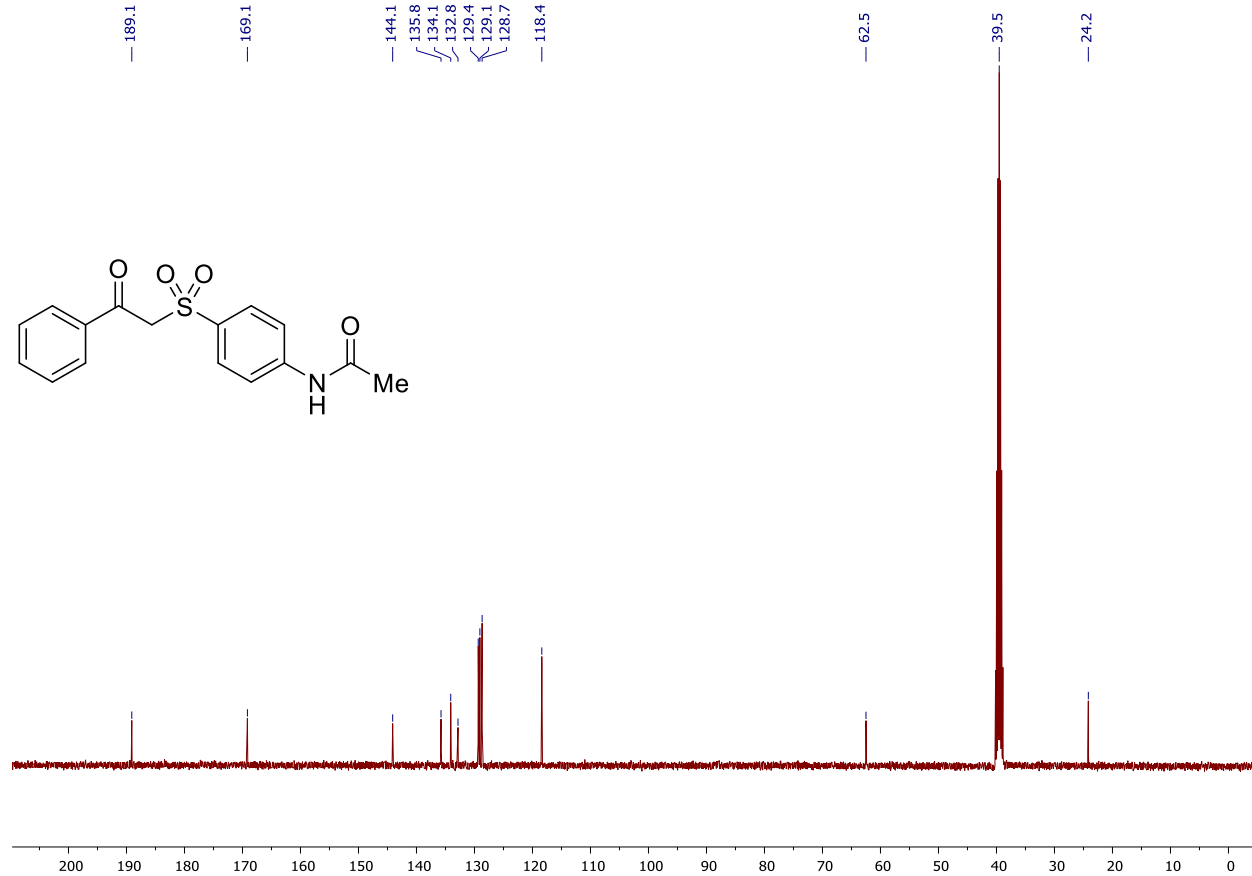

$^1\text{H}$  NMR (400 MHz,  $\text{CDCl}_3$ ) of **2i**

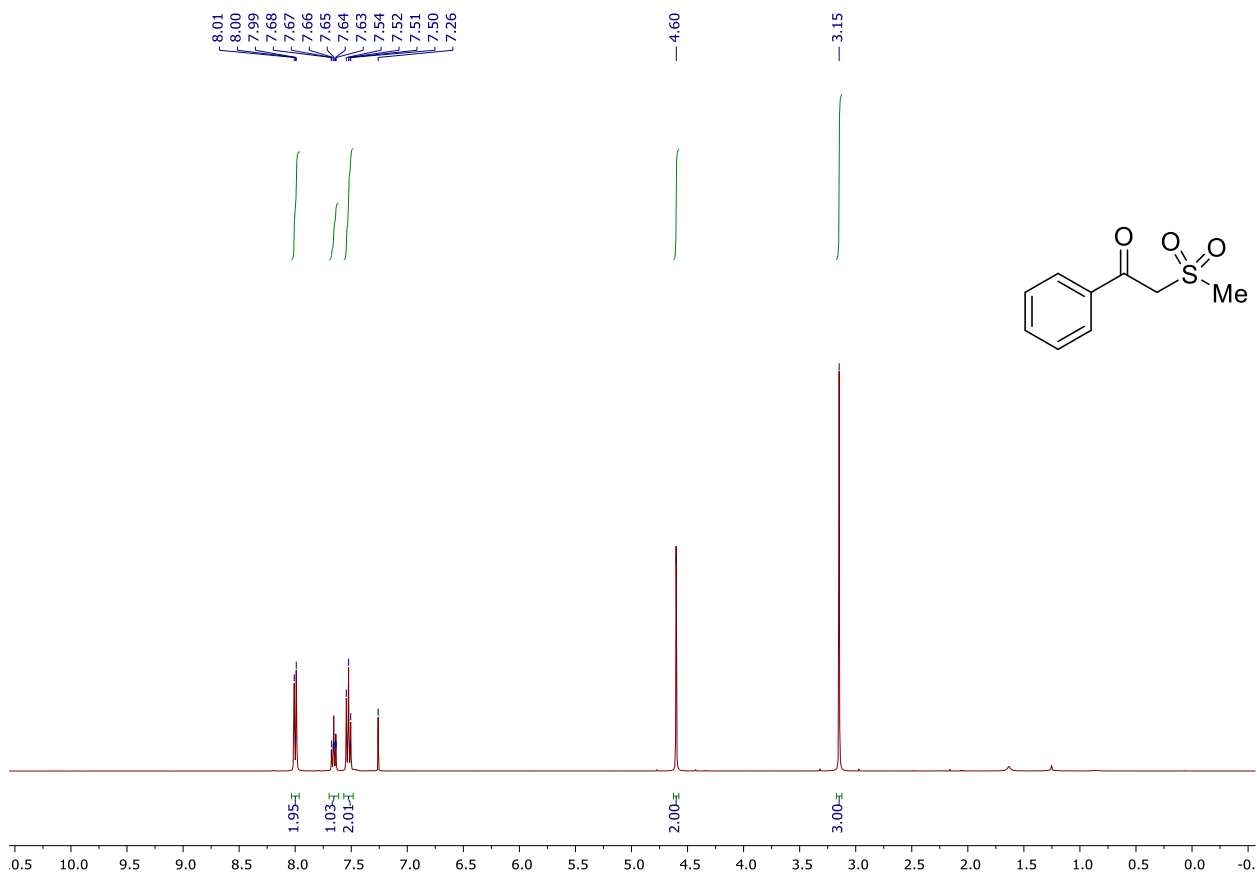

$^{13}\text{C}\{^1\text{H}\}$  NMR (100 MHz,  $\text{CDCl}_3$ ) of **2i**

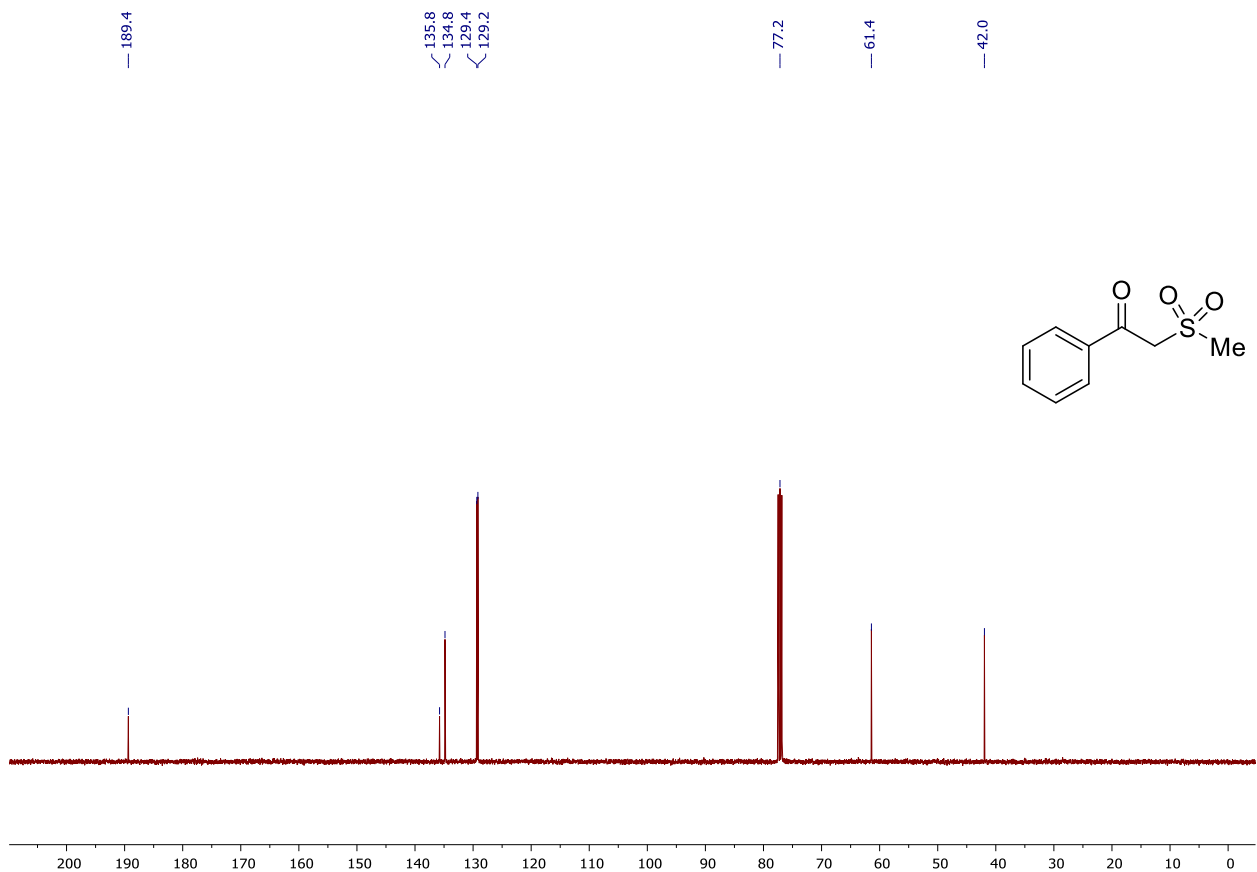

$^1\text{H}$  NMR (400 MHz,  $\text{CDCl}_3$ ) of **2j**

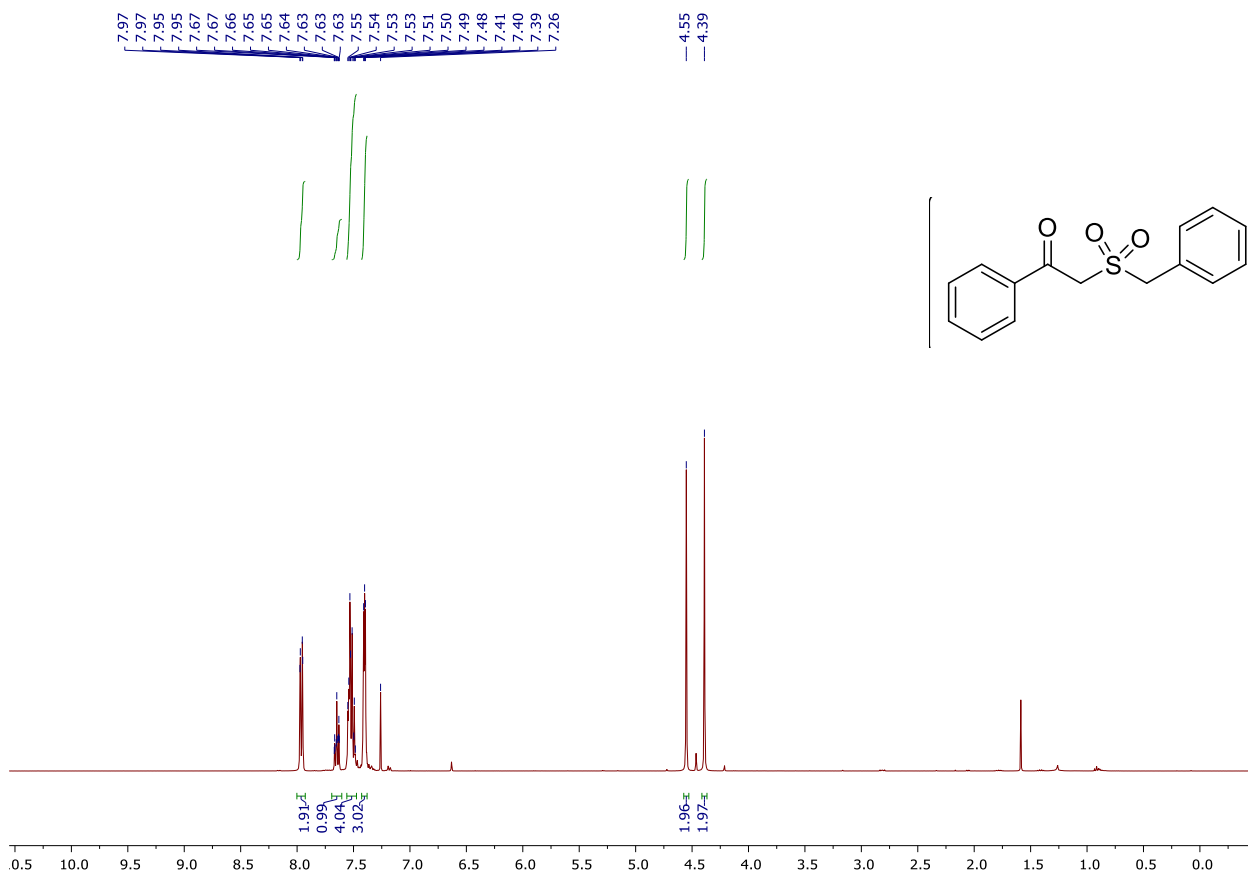

$^{13}\text{C}\{^1\text{H}\}$  NMR (100 MHz,  $\text{CDCl}_3$ ) of **2j**

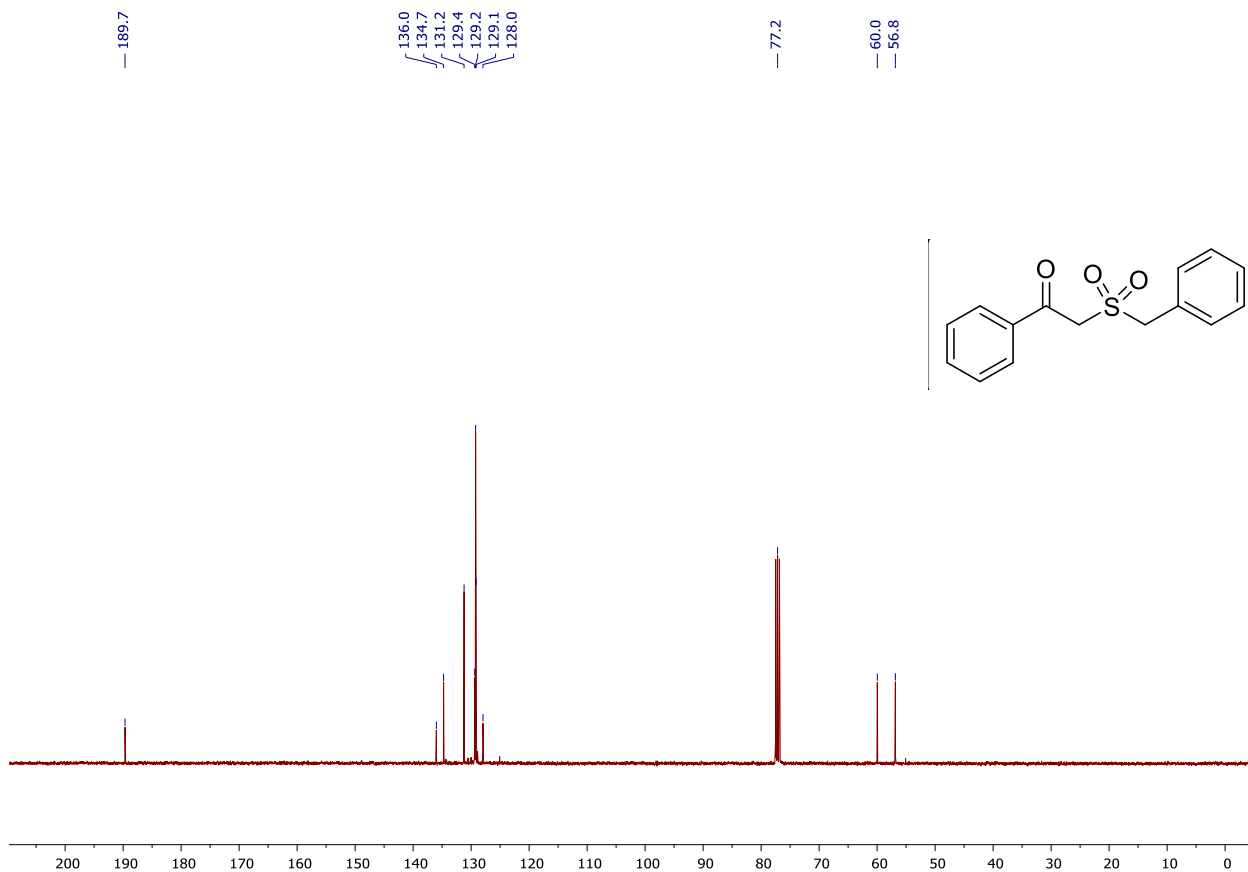



$^1\text{H}$  NMR (400 MHz,  $\text{CDCl}_3$ ) of **2k**

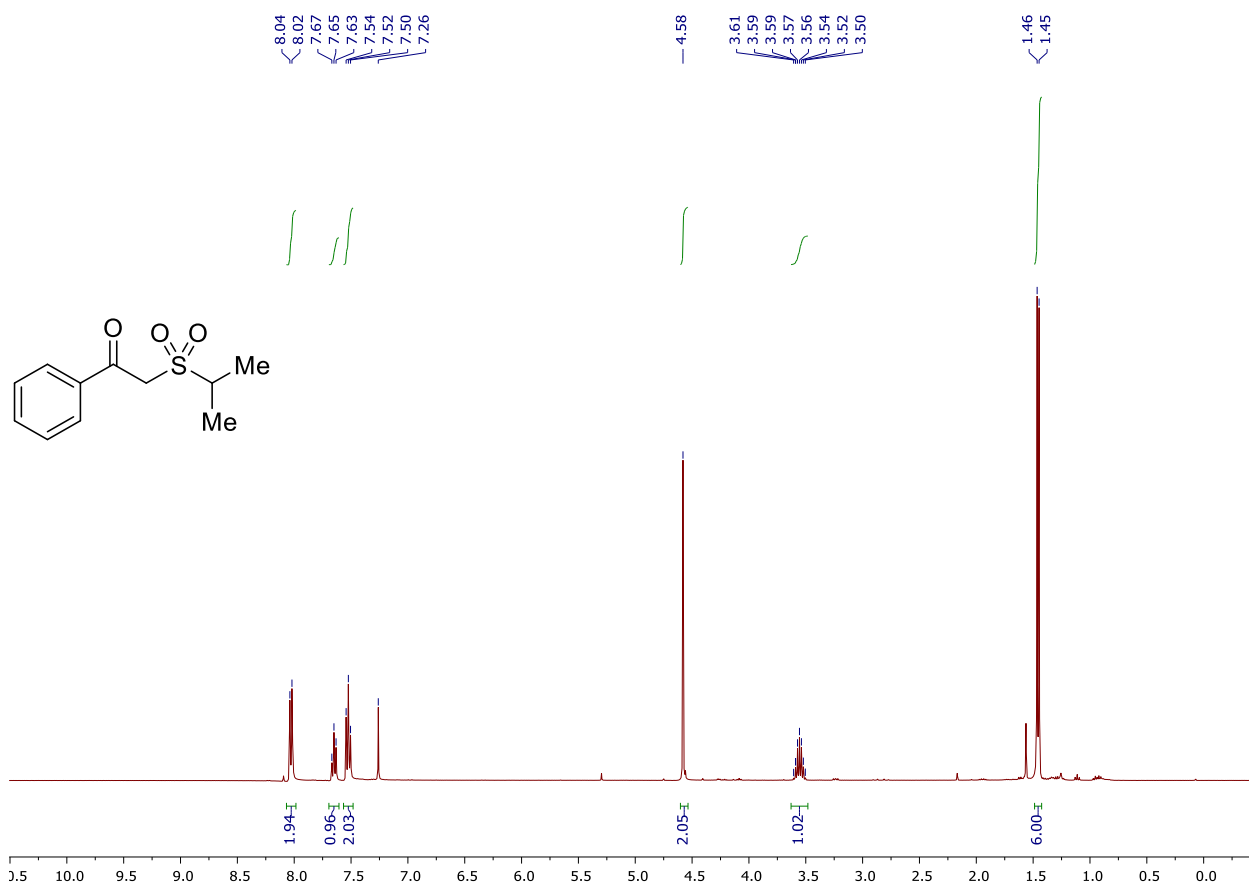

$^{13}\text{C}\{^1\text{H}\}$  NMR (100 MHz,  $\text{CDCl}_3$ ) of **2k**

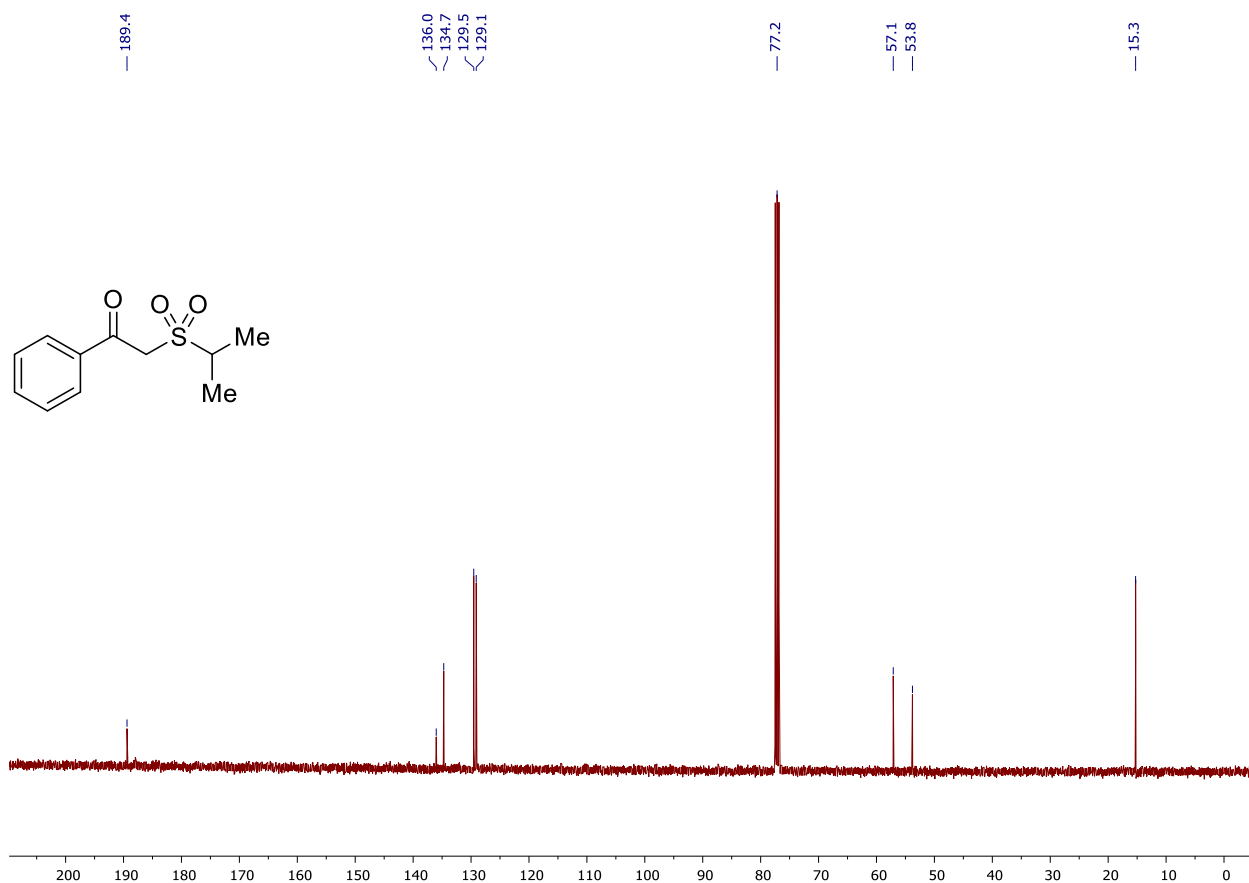

$^1\text{H}$  NMR (400 MHz,  $\text{CDCl}_3$ ) of **21**

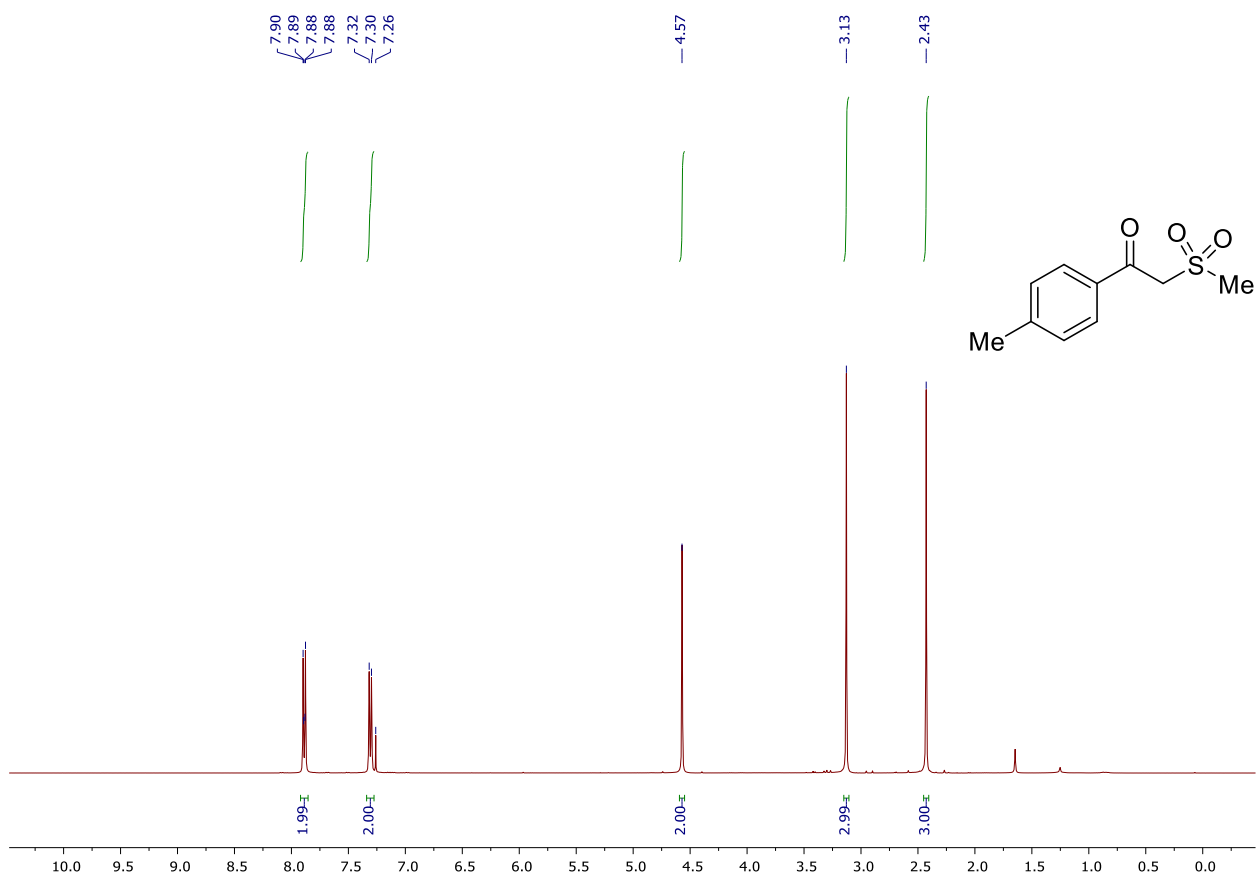

$^{13}\text{C}\{^1\text{H}\}$  NMR (100 MHz,  $\text{CDCl}_3$ ) of **21**

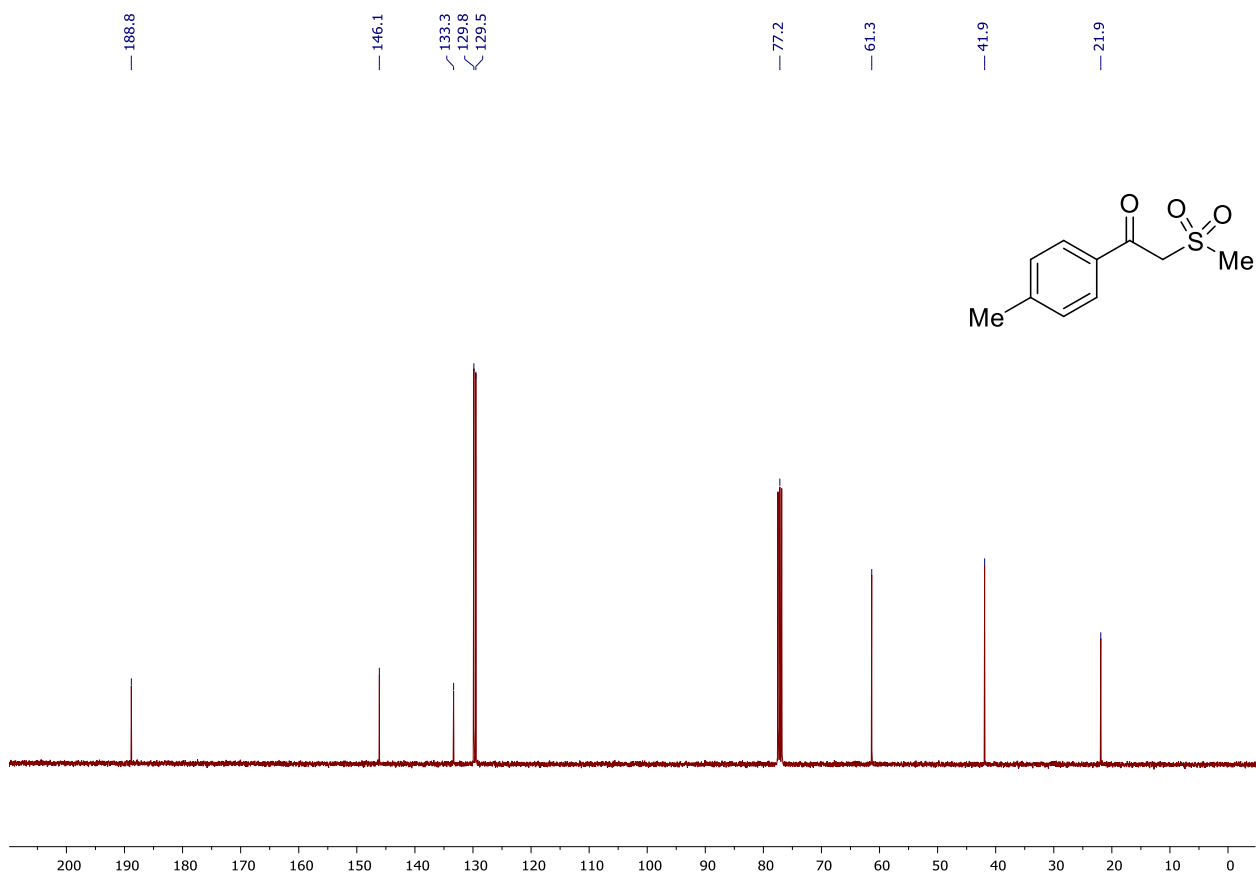

$^1\text{H}$  NMR (400 MHz,  $\text{CDCl}_3$ ) of **2m**

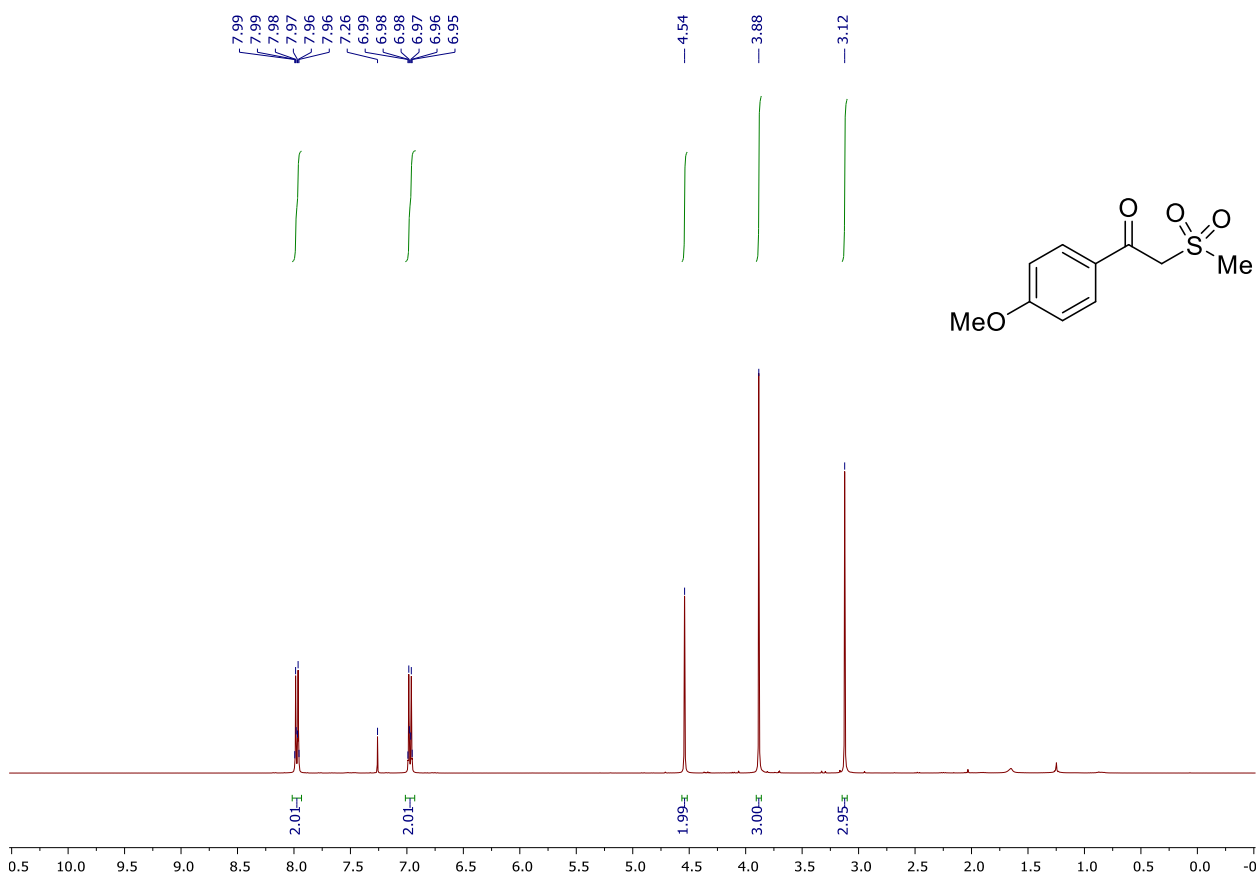

$^{13}\text{C}\{^1\text{H}\}$  NMR (100 MHz,  $\text{CDCl}_3$ ) of **2m**

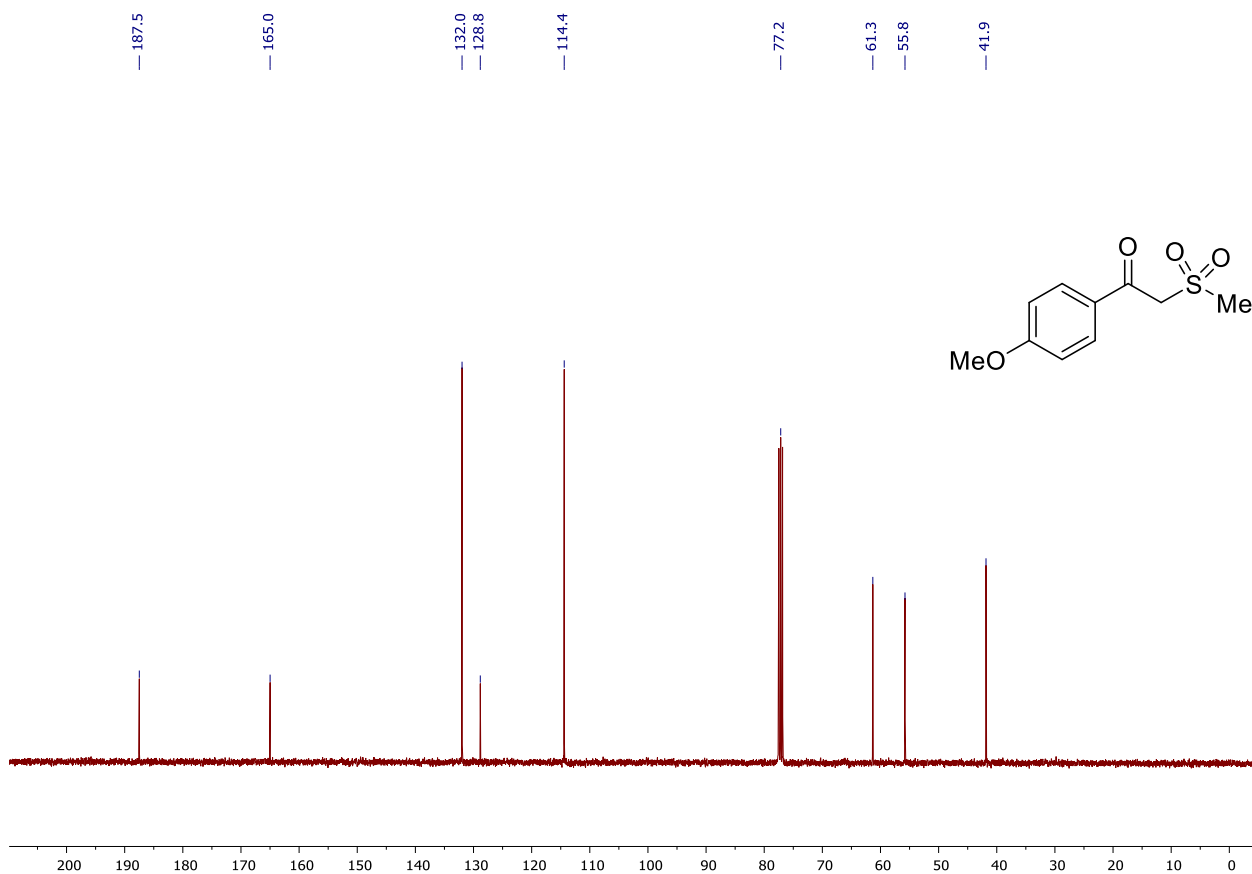

$^1\text{H}$  NMR (400 MHz,  $\text{CDCl}_3$ ) of **2n**

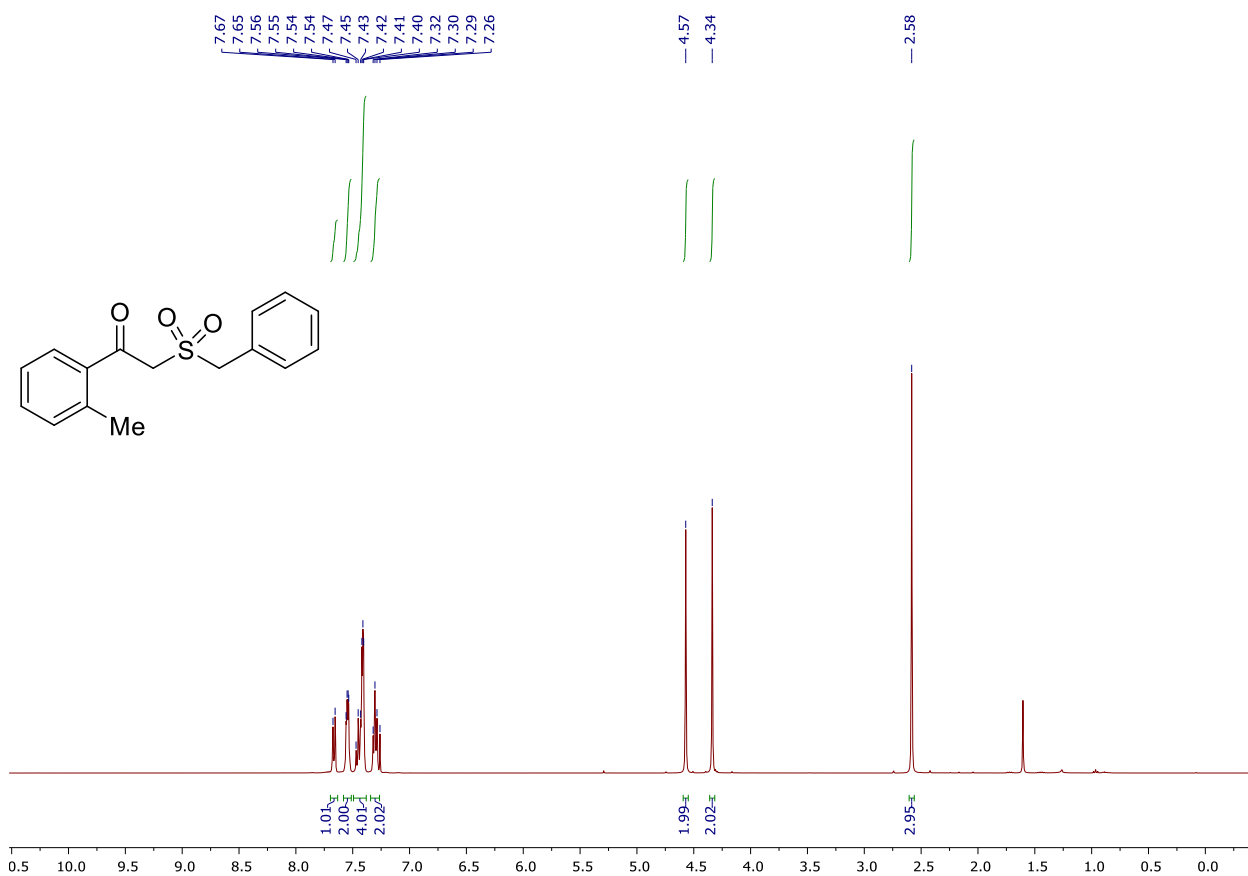

$^{13}\text{C}\{^1\text{H}\}$  NMR (100 MHz,  $\text{CDCl}_3$ ) of **2n**

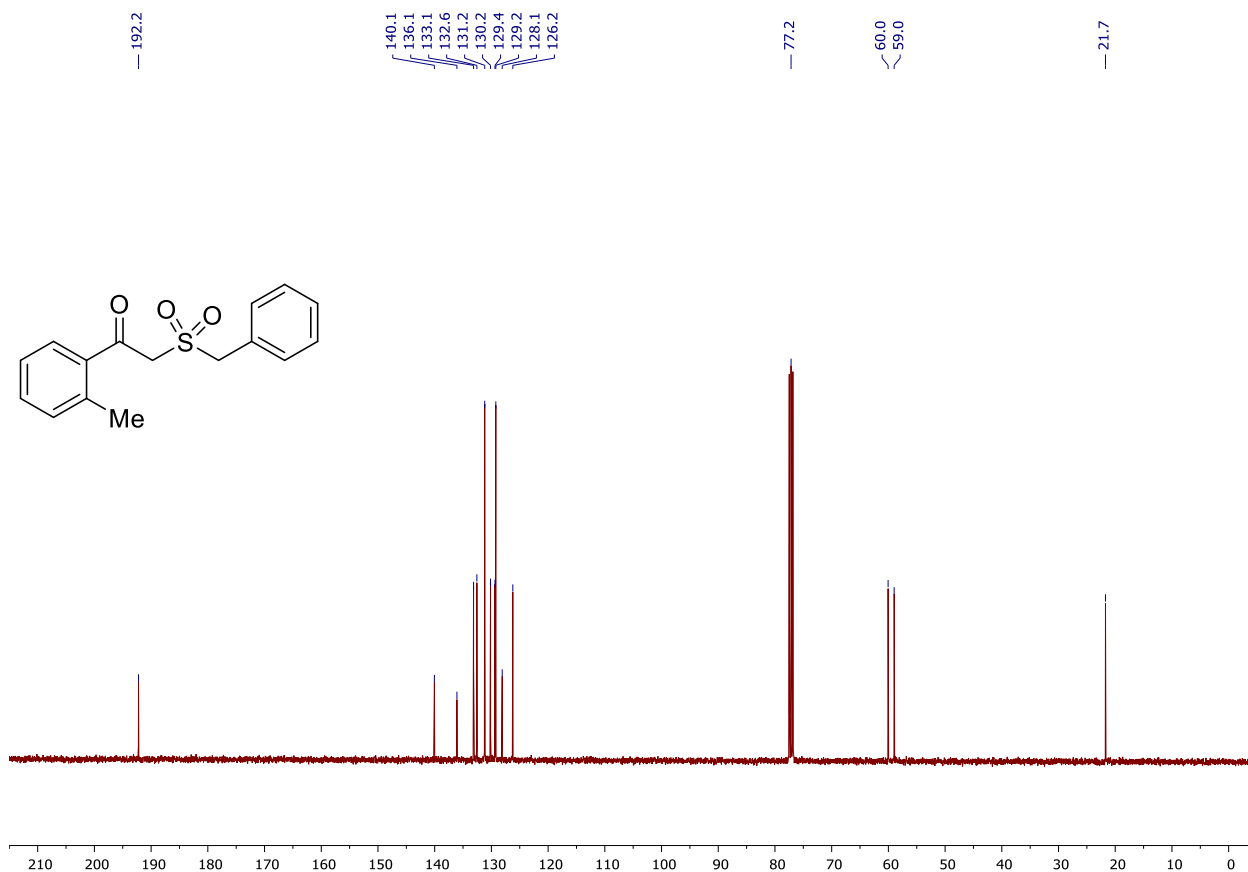

$^1\text{H}$  NMR (400 MHz,  $\text{CDCl}_3$ ) of **2o**

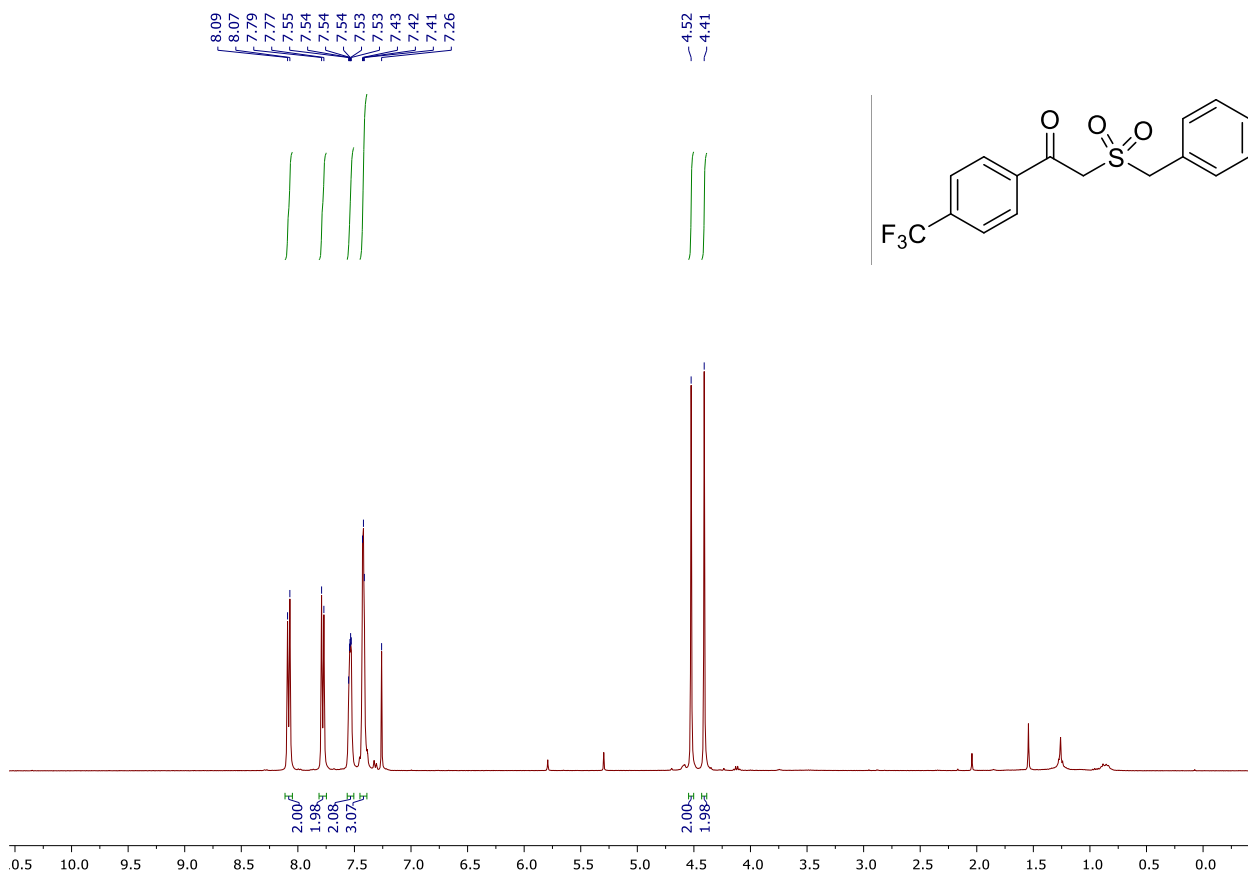

$^{13}\text{C}\{^1\text{H}\}$  NMR (100 MHz,  $\text{CDCl}_3$ ) of **2o**

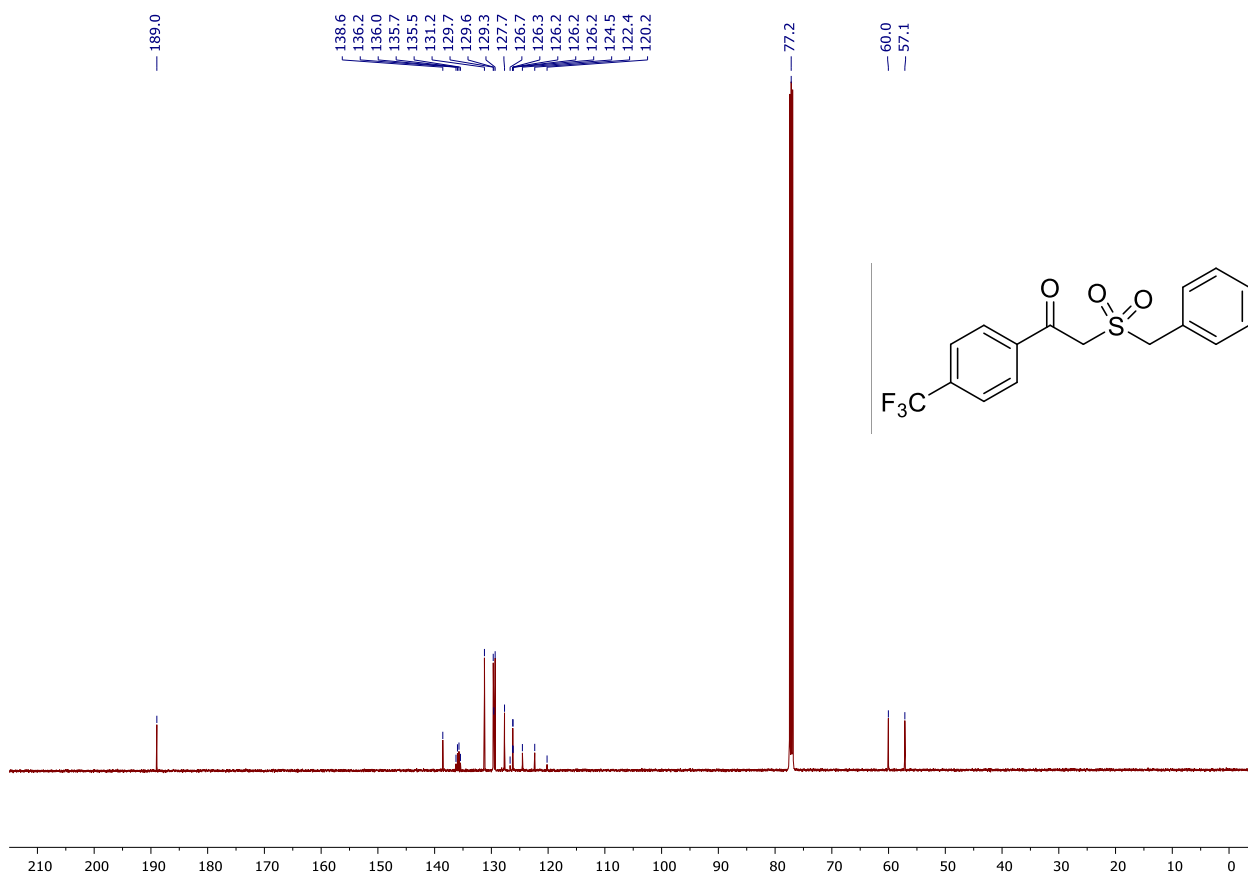

$^{19}\text{F}\{^1\text{H}\}$  NMR (376 MHz,  $\text{CDCl}_3$ ) of **2o**

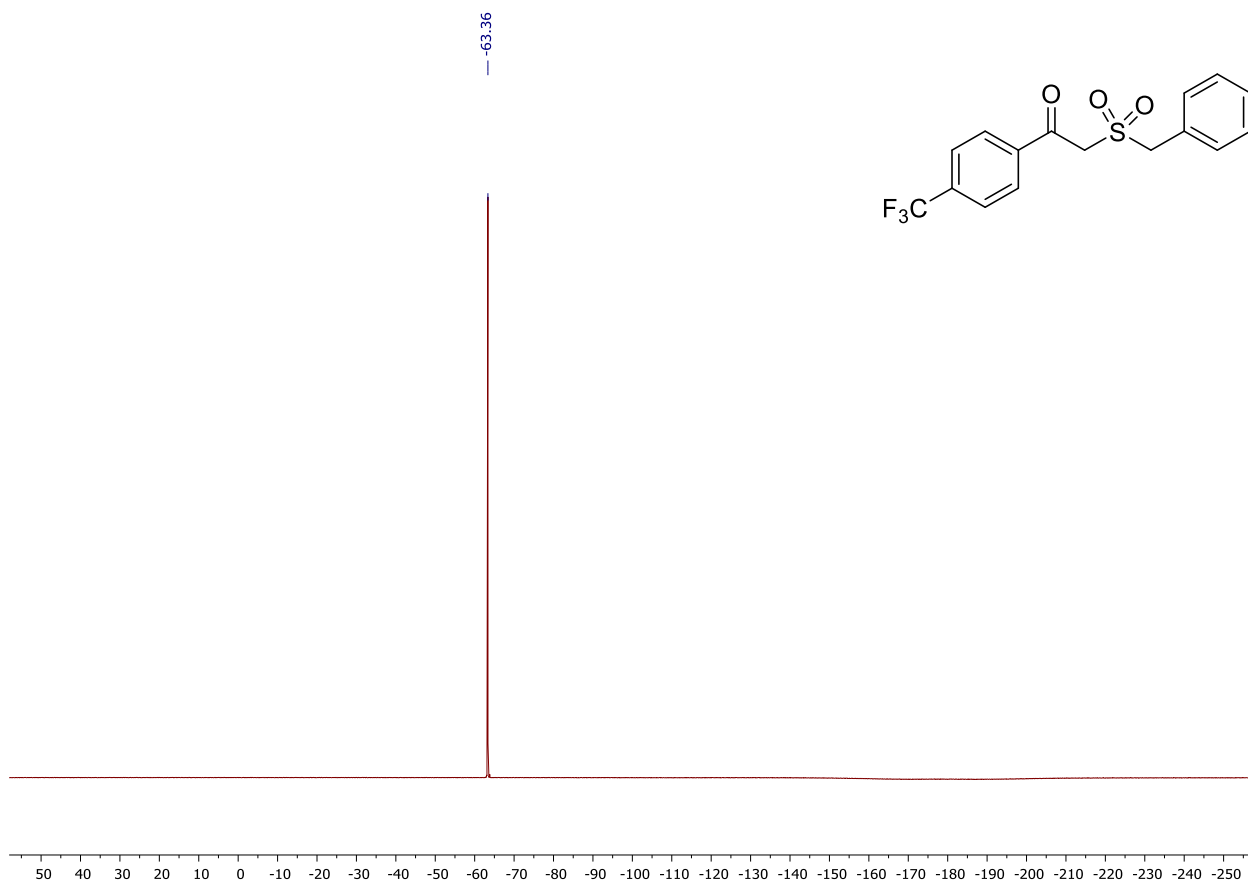

$^1\text{H}$  NMR (400 MHz,  $\text{CDCl}_3$ ) of **2p**

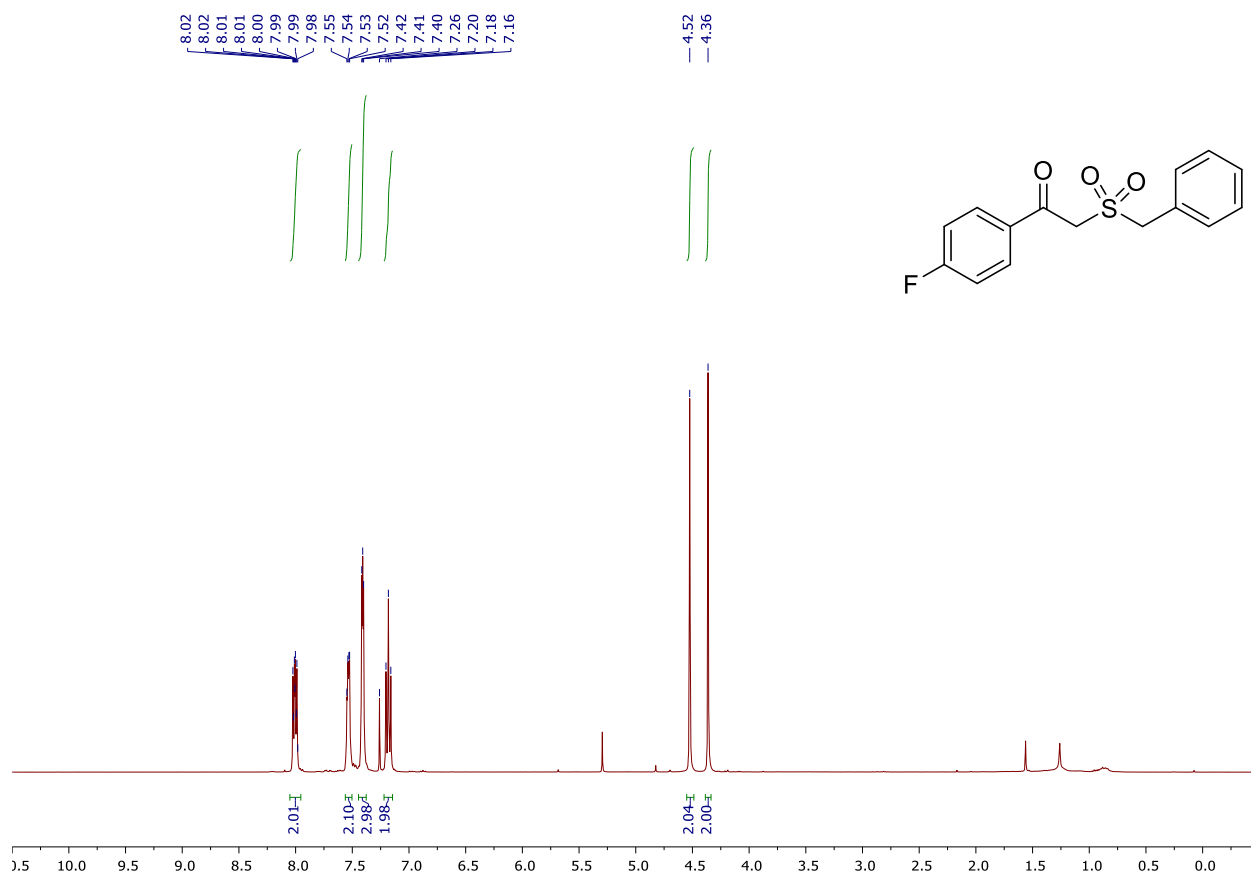

$^{13}\text{C}\{^1\text{H}\}$  NMR (100 MHz,  $\text{CDCl}_3$ ) of **2p**

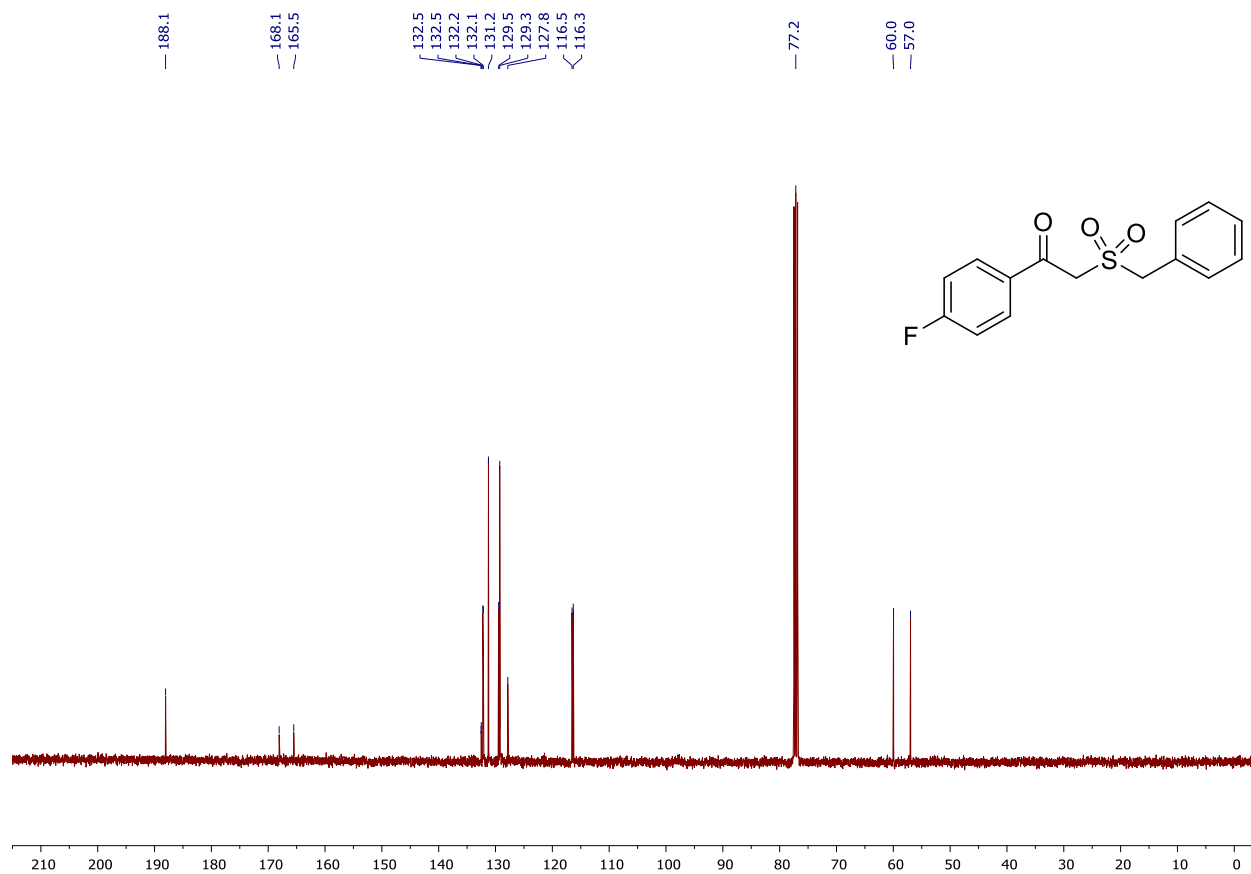

$^{19}\text{F}\{^1\text{H}\}$  NMR (376 MHz,  $\text{CDCl}_3$ ) of **2p**

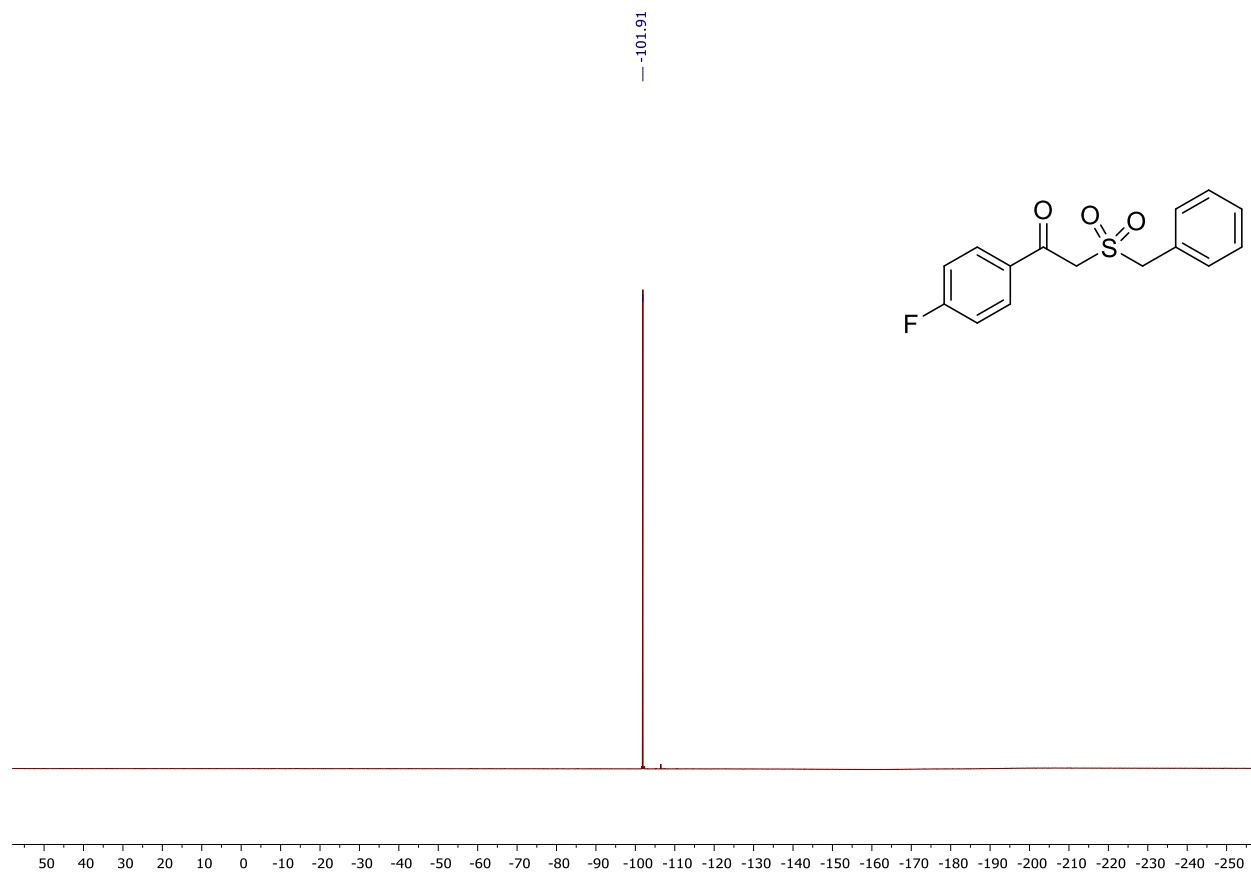

$^1\text{H}$  NMR (400 MHz,  $\text{DMSO-}d_6$ ) of **2q**

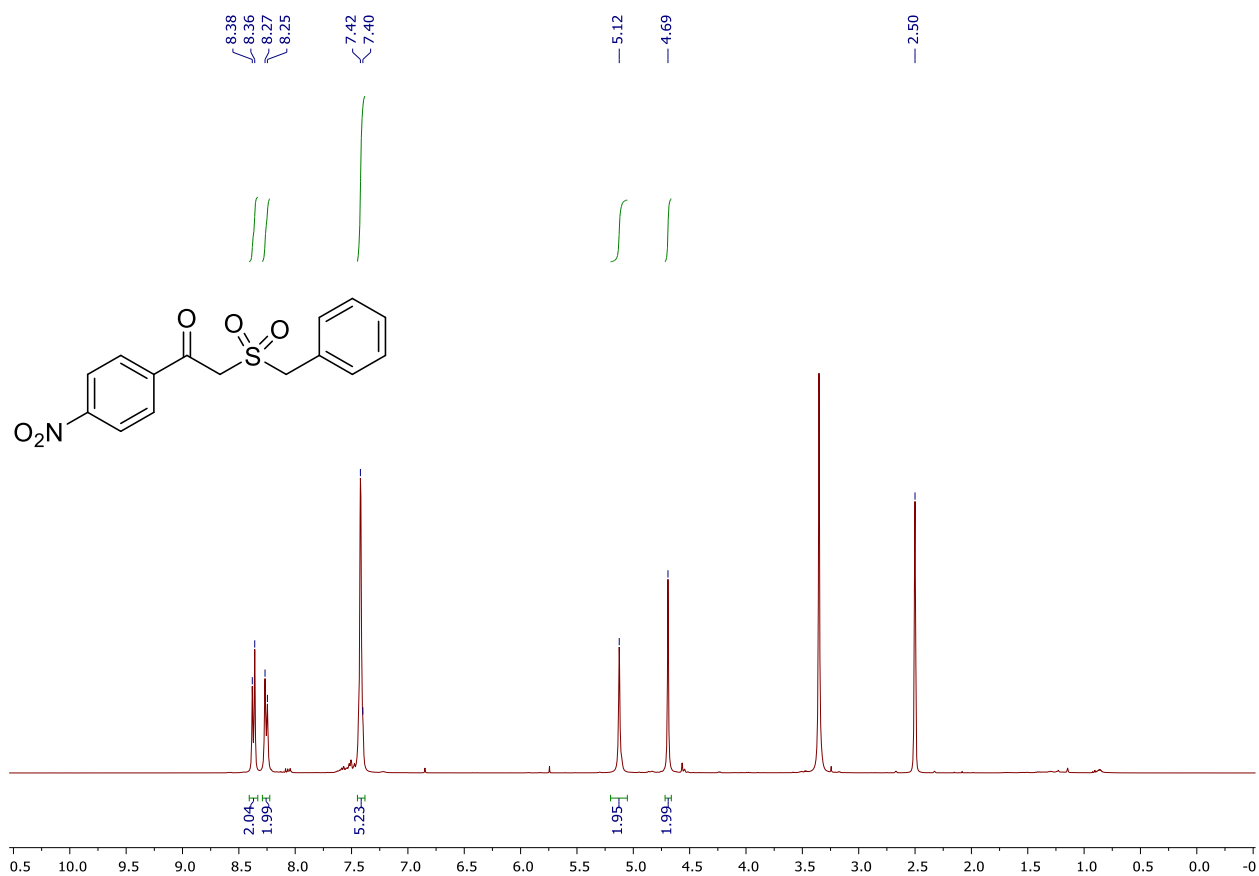

$^{13}\text{C}\{^1\text{H}\}$  NMR (100 MHz,  $\text{DMSO-}d_6$ ) of **2q**

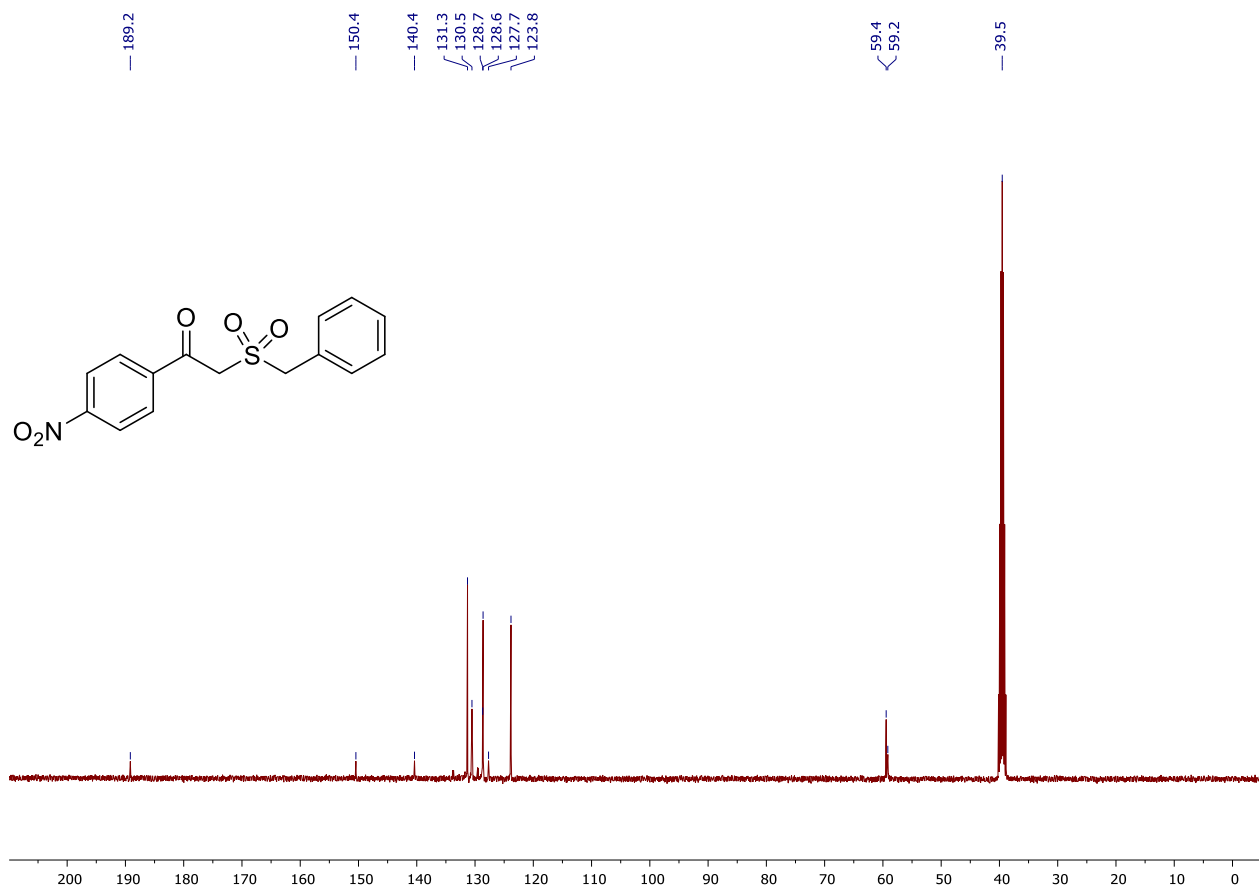



$^1\text{H}$  NMR (400 MHz,  $\text{CDCl}_3$ ) of **2r**

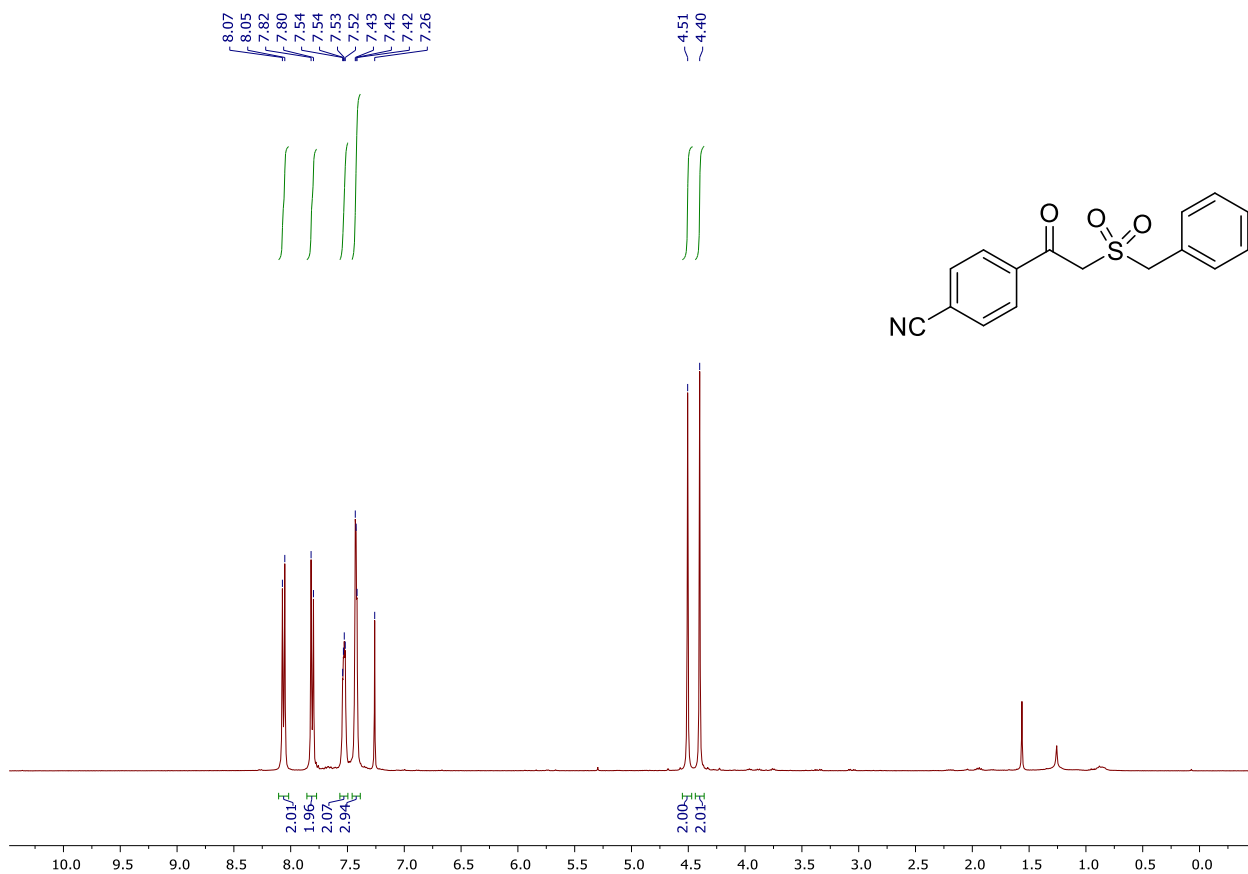

$^{13}\text{C}\{^1\text{H}\}$  NMR (100 MHz,  $\text{CDCl}_3$ ) of **2r**

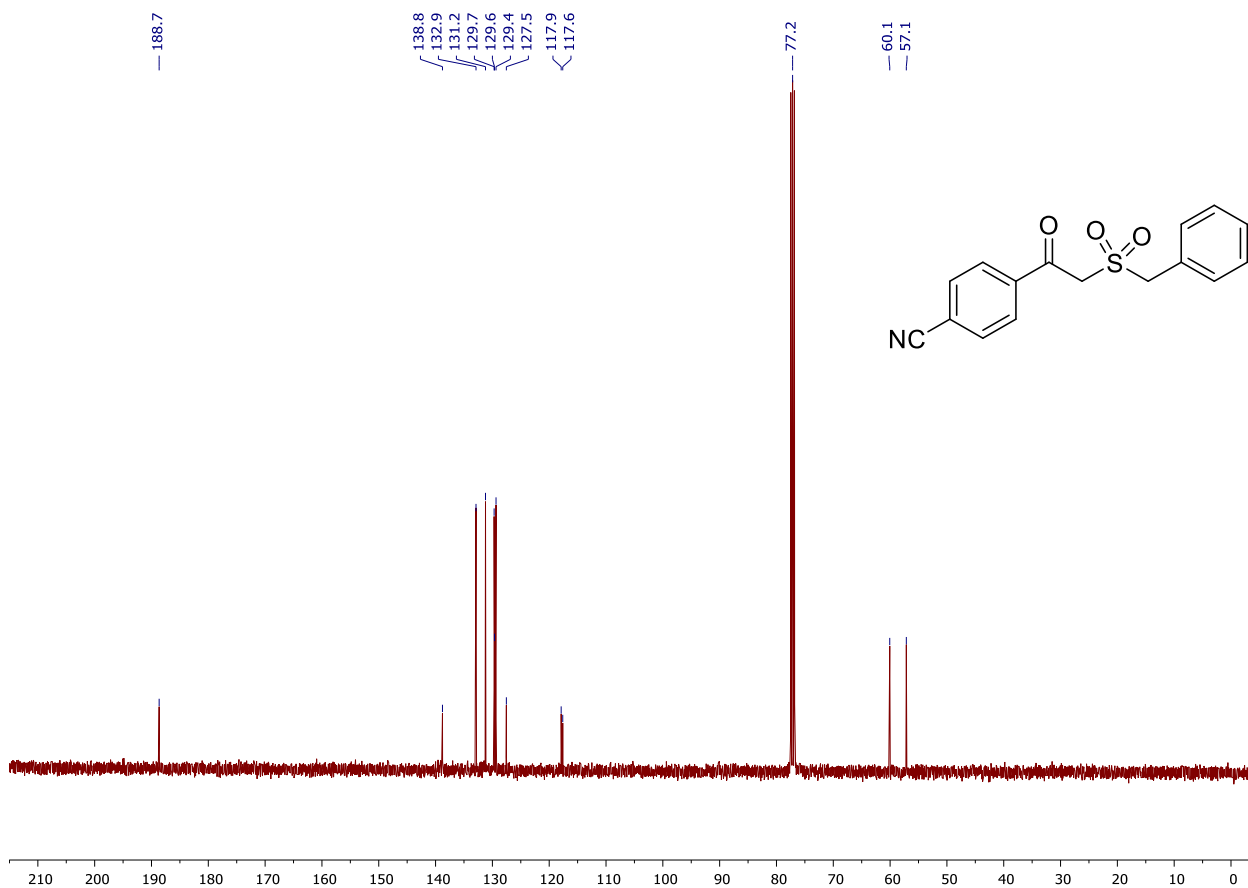

$^1\text{H}$  NMR (400 MHz,  $\text{CDCl}_3$ ) of **2s**

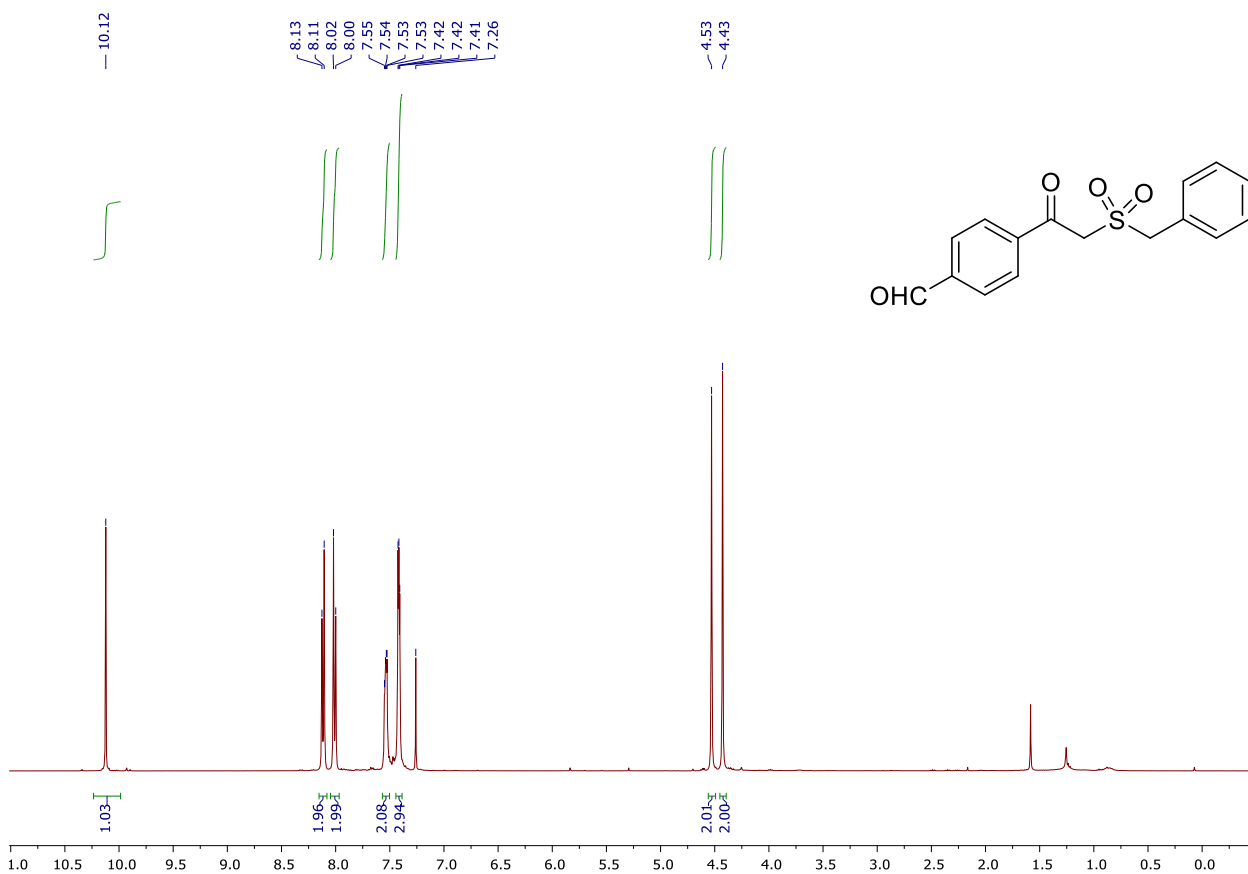

$^{13}\text{C}\{^1\text{H}\}$  NMR (100 MHz,  $\text{CDCl}_3$ ) of **2s**

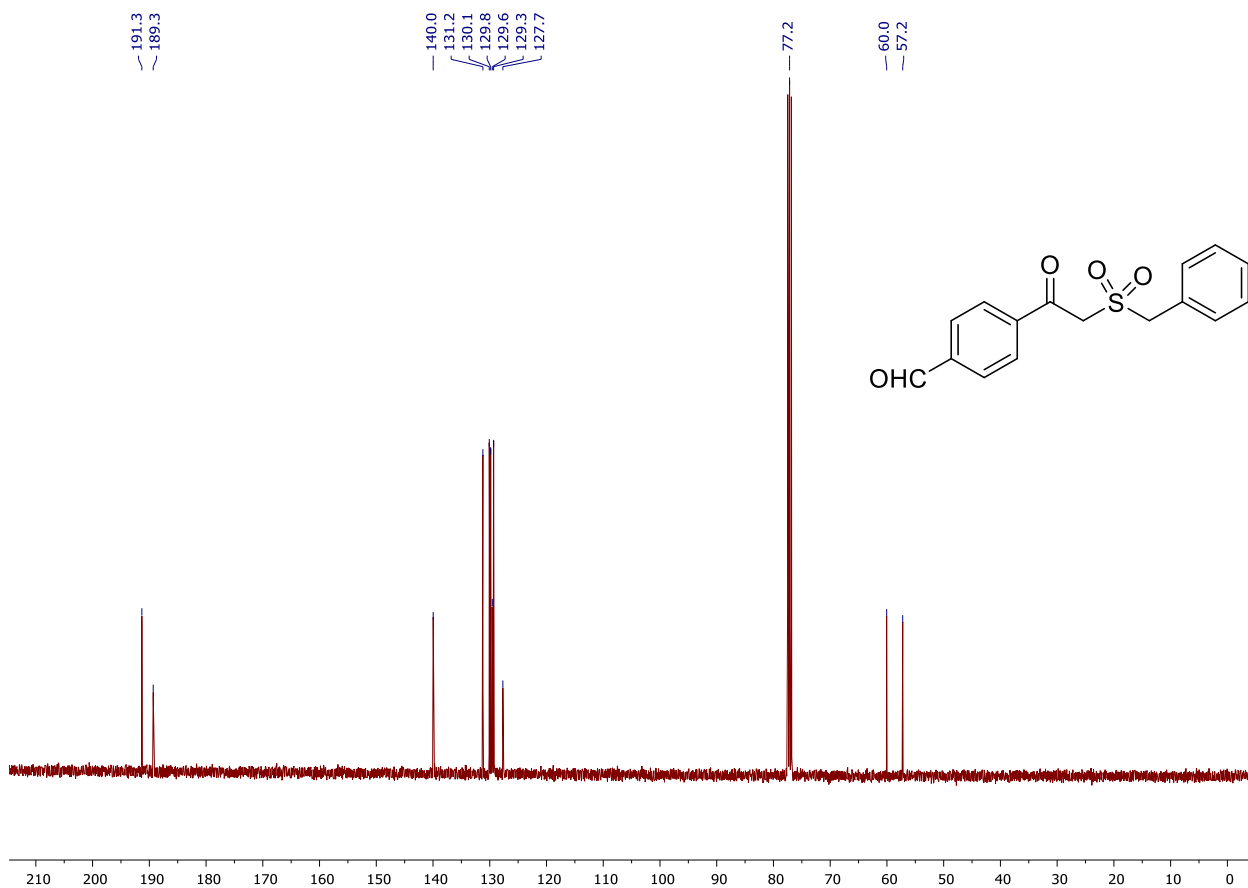

$^1\text{H}$  NMR (400 MHz,  $\text{CDCl}_3$ ) of **2t**

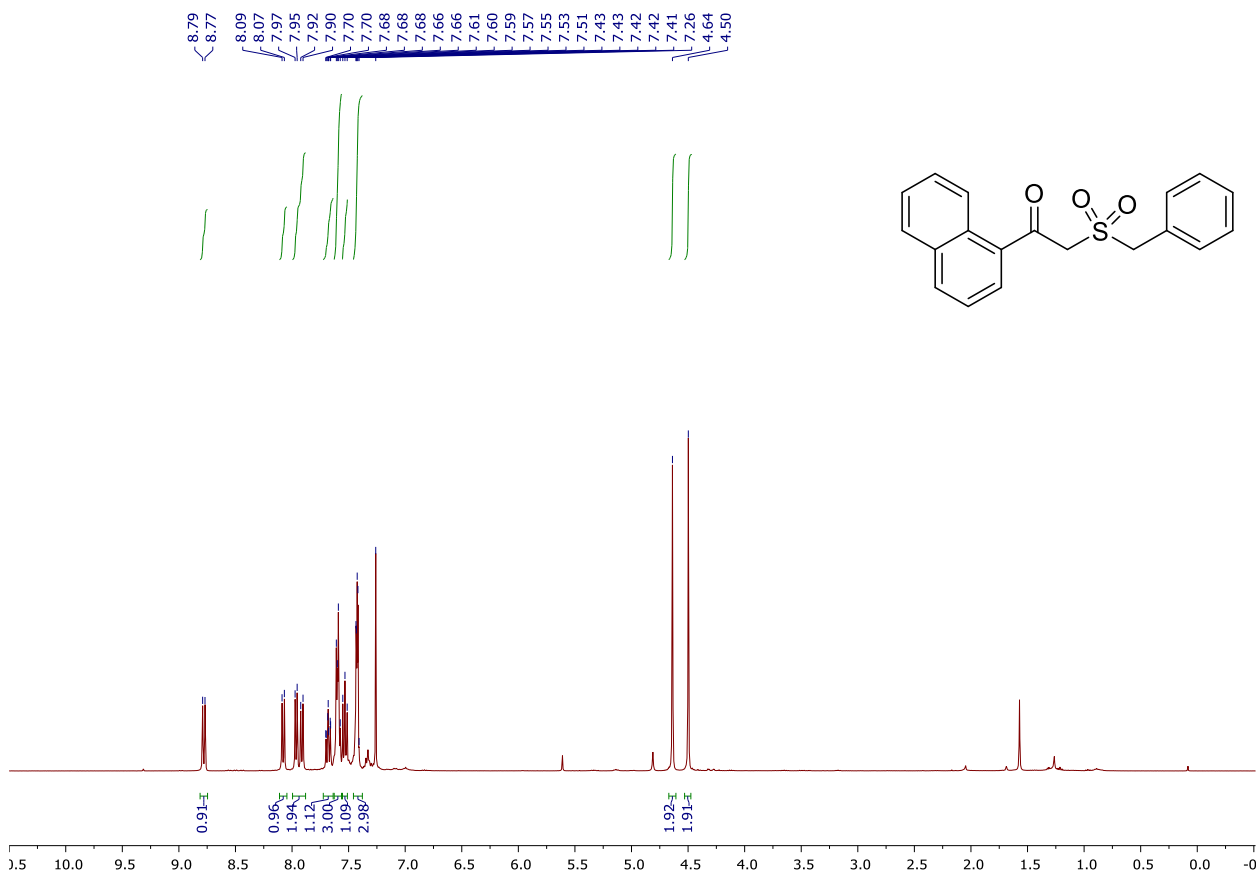

$^{13}\text{C}\{^1\text{H}\}$  NMR (100 MHz,  $\text{CDCl}_3$ ) of **2t**

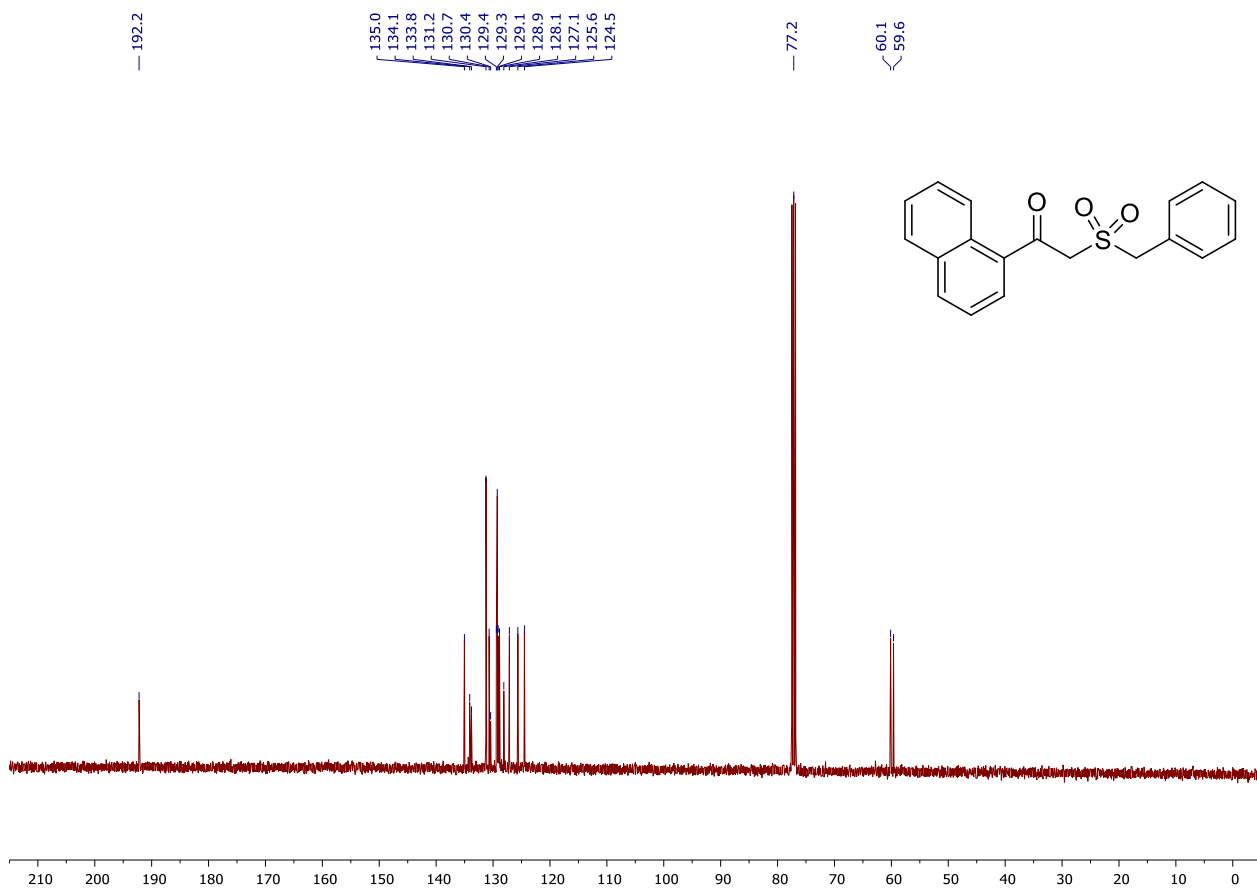

$^1\text{H}$  NMR (400 MHz,  $\text{CDCl}_3$ ) of **2u**

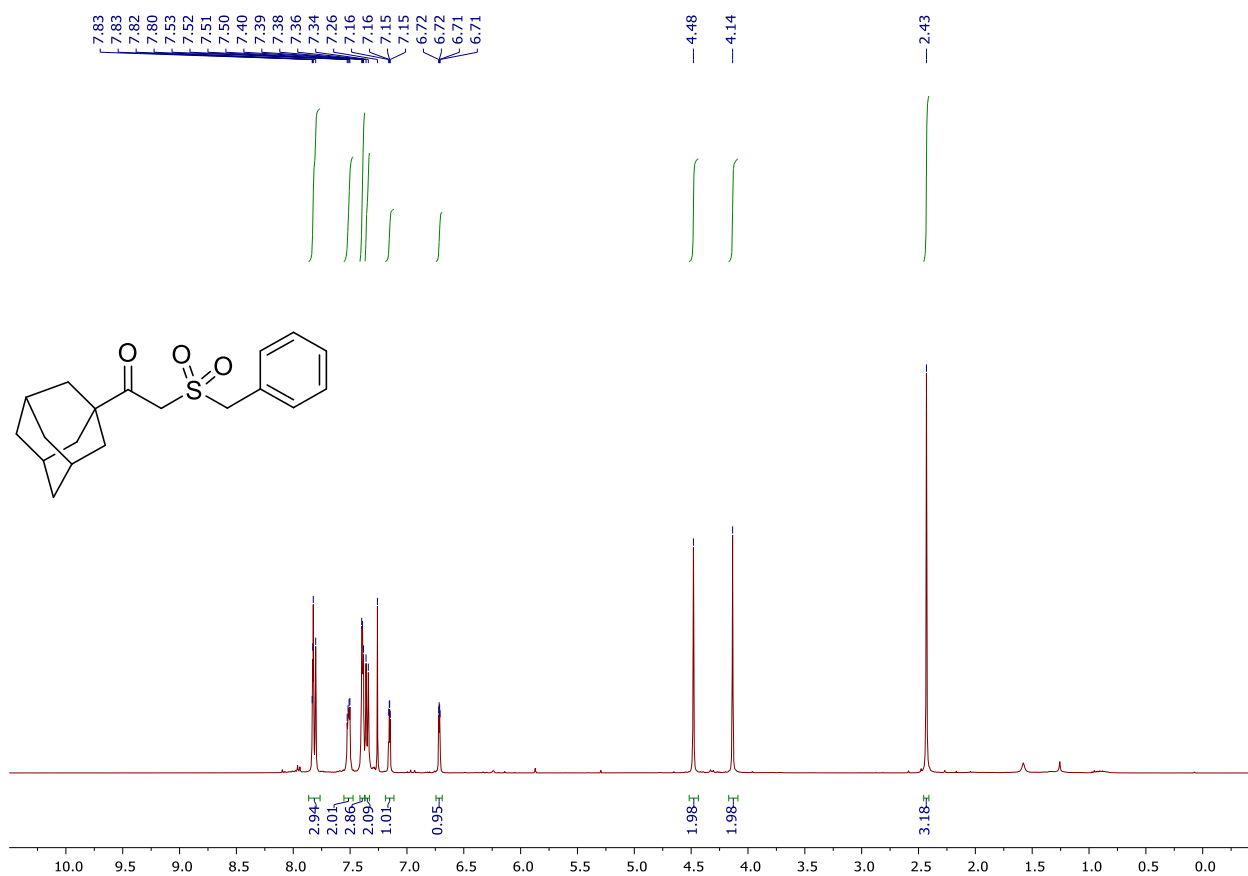

$^{13}\text{C}\{^1\text{H}\}$  NMR (100 MHz,  $\text{CDCl}_3$ ) of **2u**

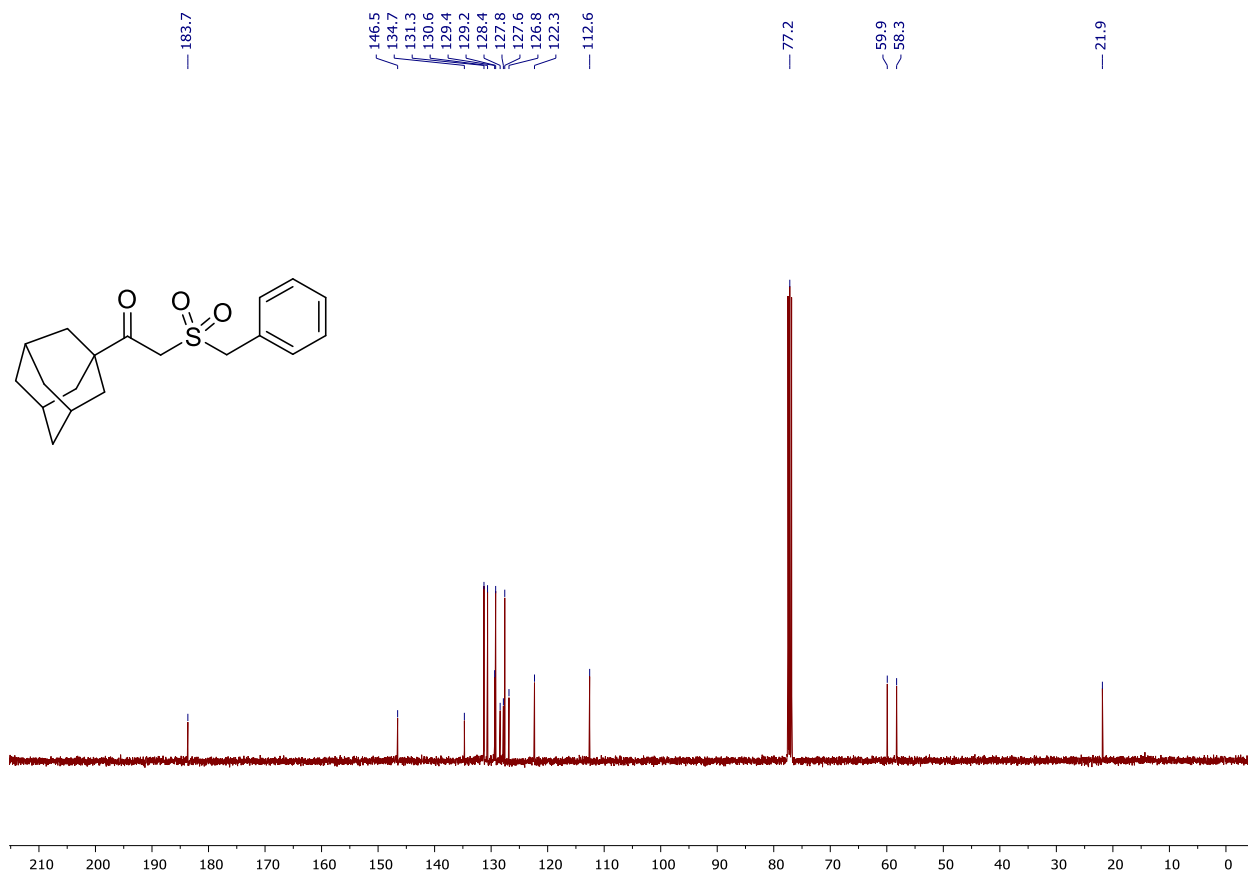

$^1\text{H}$  NMR (400 MHz,  $\text{CDCl}_3$ ) of **2v**

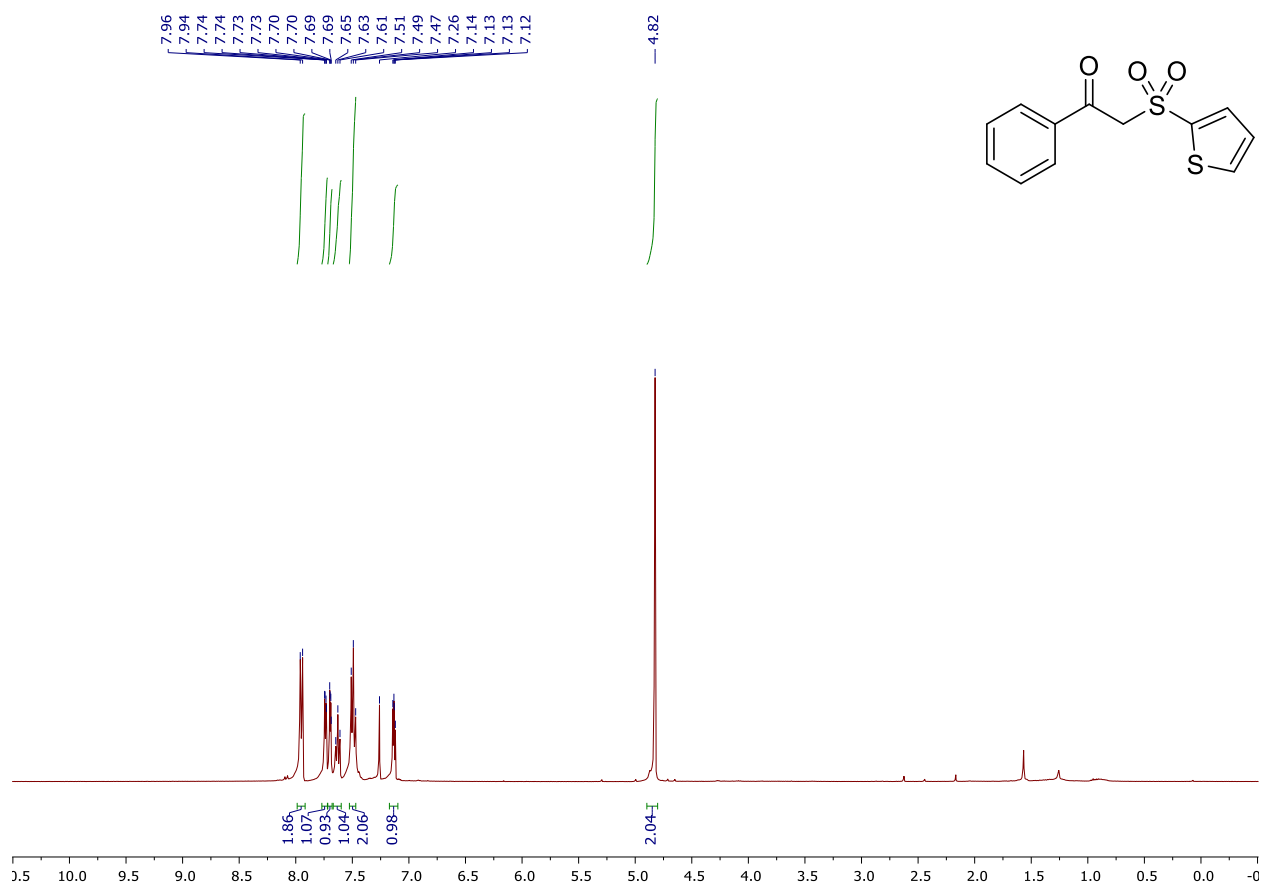

$^{13}\text{C}\{^1\text{H}\}$  NMR (100 MHz,  $\text{CDCl}_3$ ) of **2v**

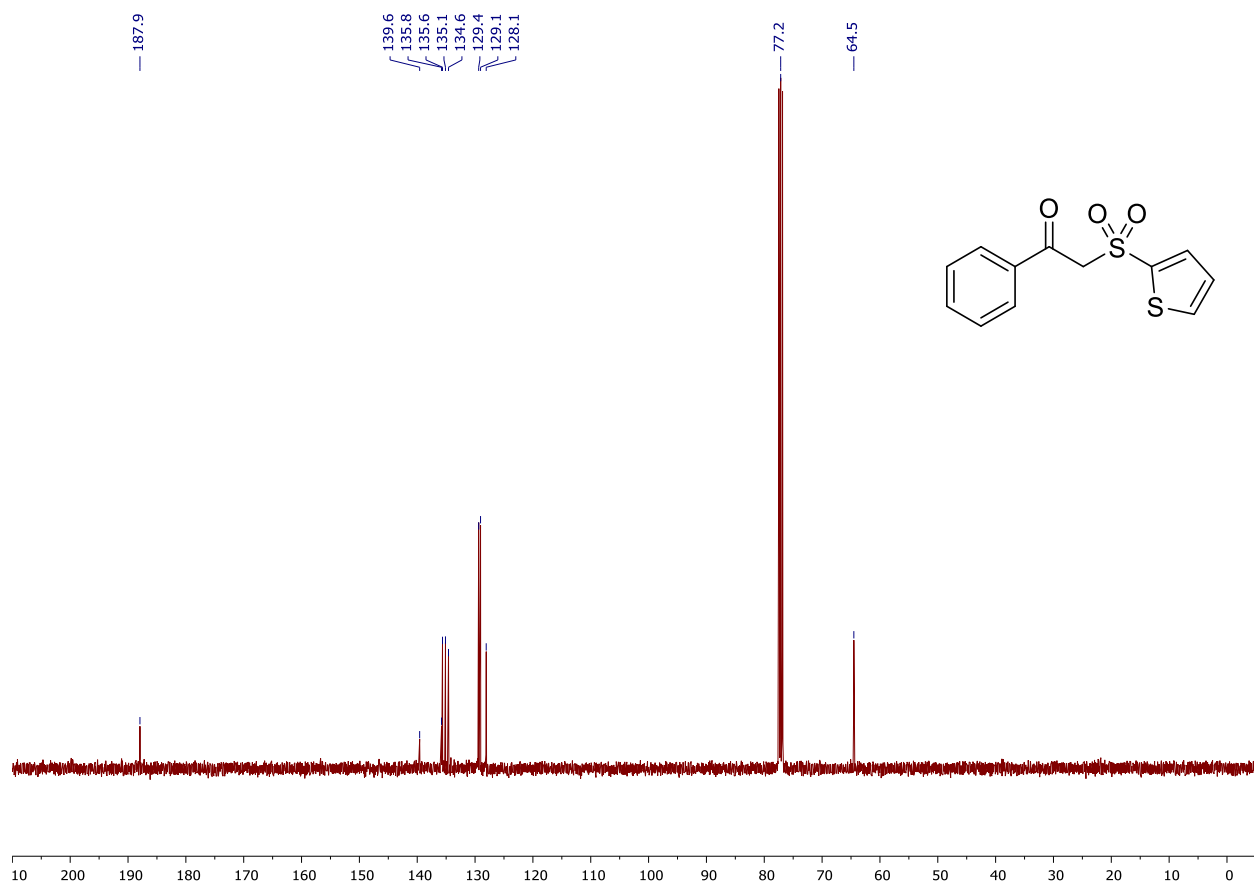

$^1\text{H}$  NMR (400 MHz,  $\text{CDCl}_3$ ) of **2w**

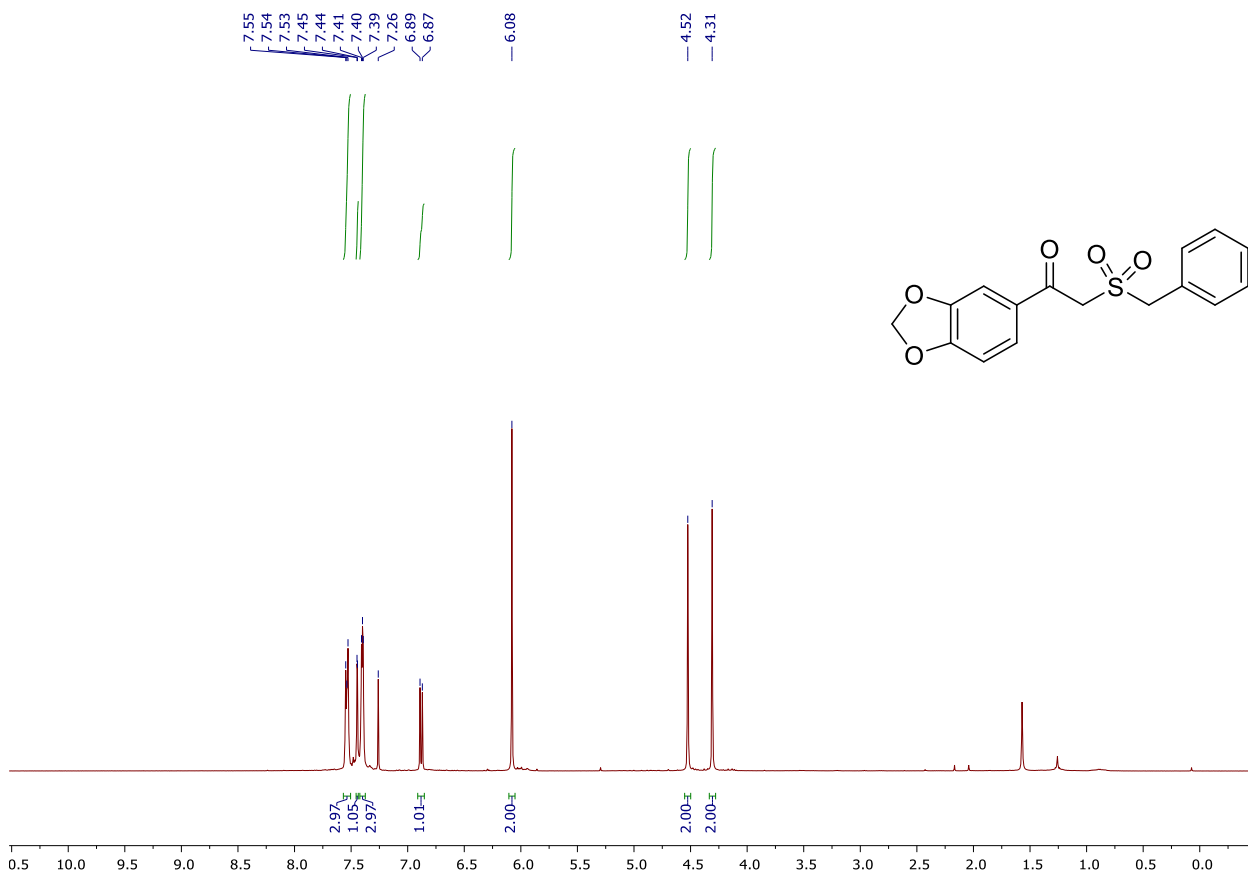

$^{13}\text{C}\{^1\text{H}\}$  NMR (100 MHz,  $\text{CDCl}_3$ ) of **2w**

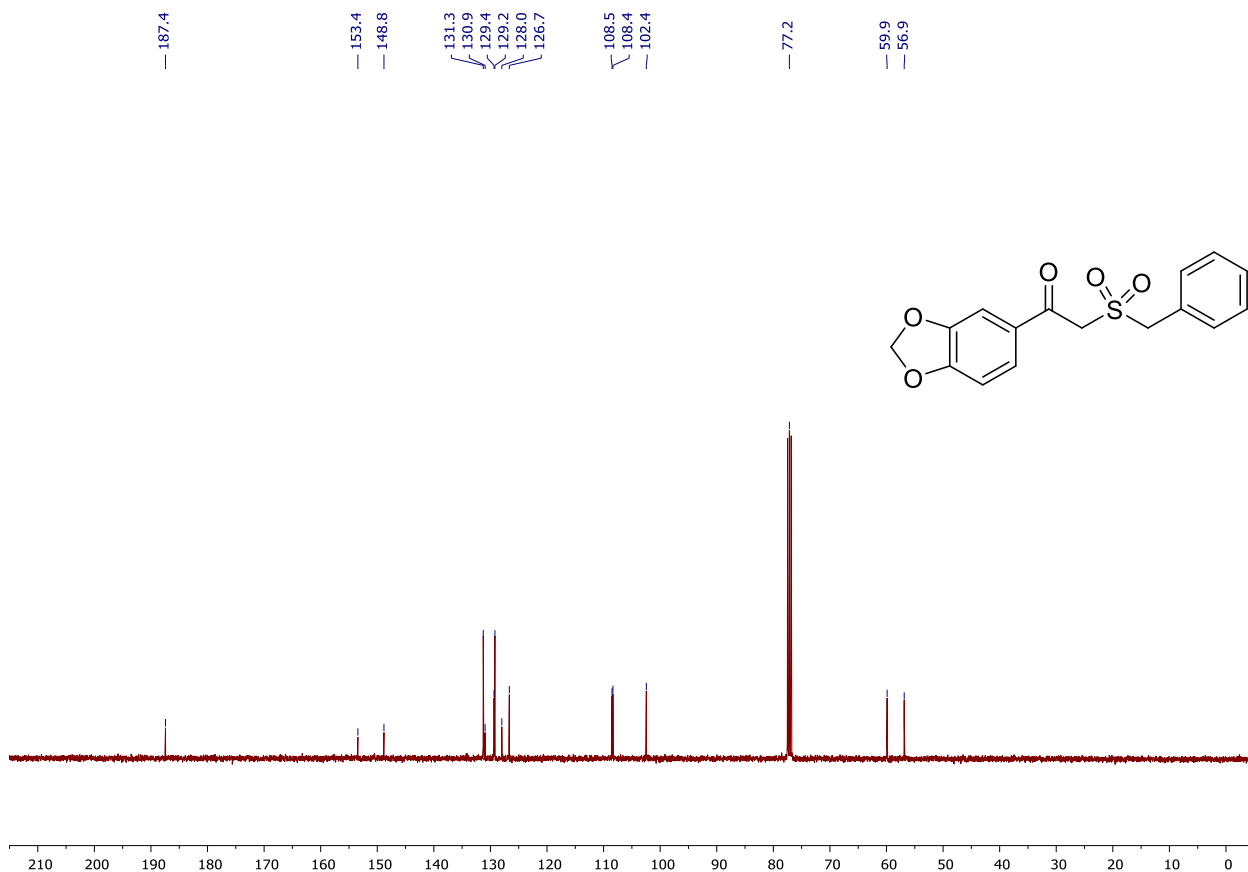

$^1\text{H}$  NMR (400 MHz,  $\text{CDCl}_3$ ) of **2x**

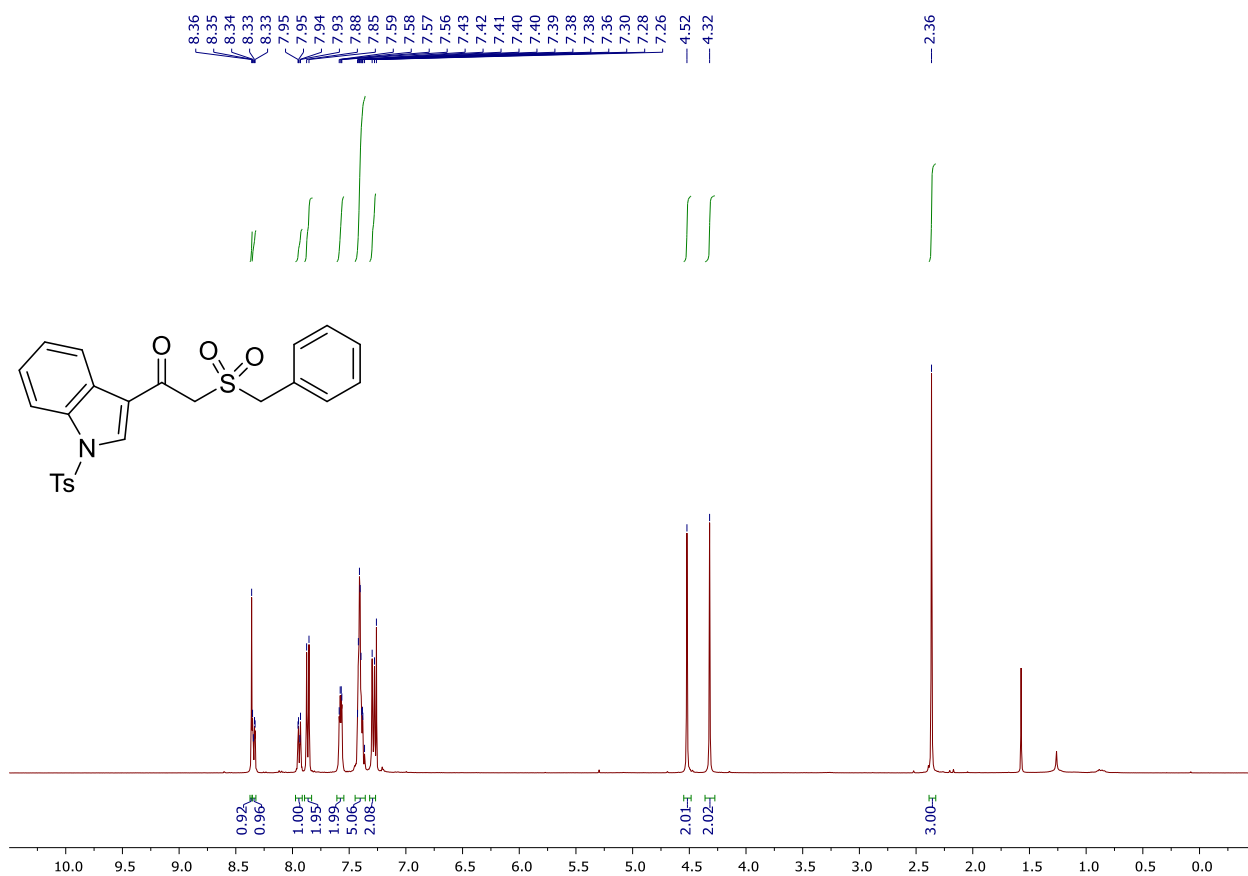

$^{13}\text{C}\{^1\text{H}\}$  NMR (100 MHz,  $\text{CDCl}_3$ ) of **2x**

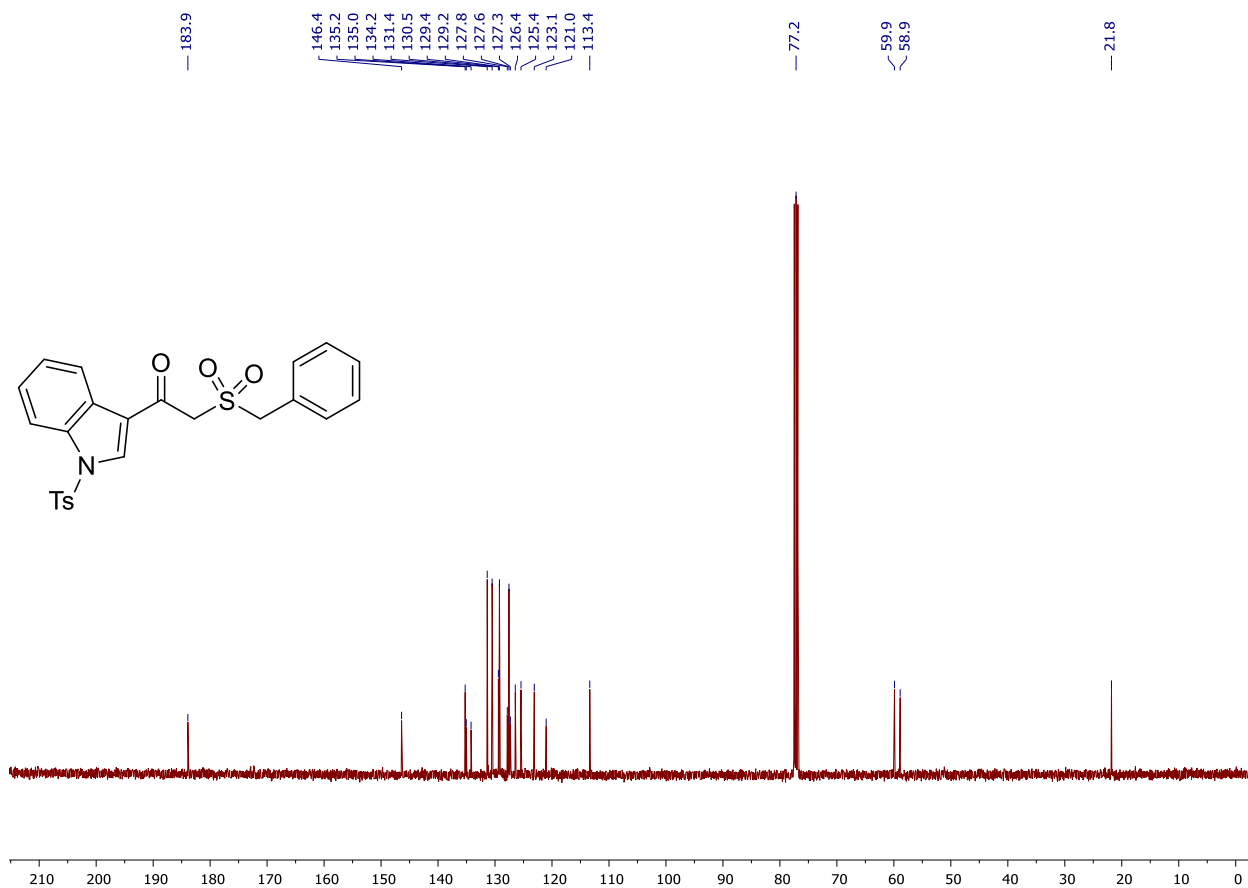

$^1\text{H}$  NMR (400 MHz,  $\text{CDCl}_3$ ) of **2y**

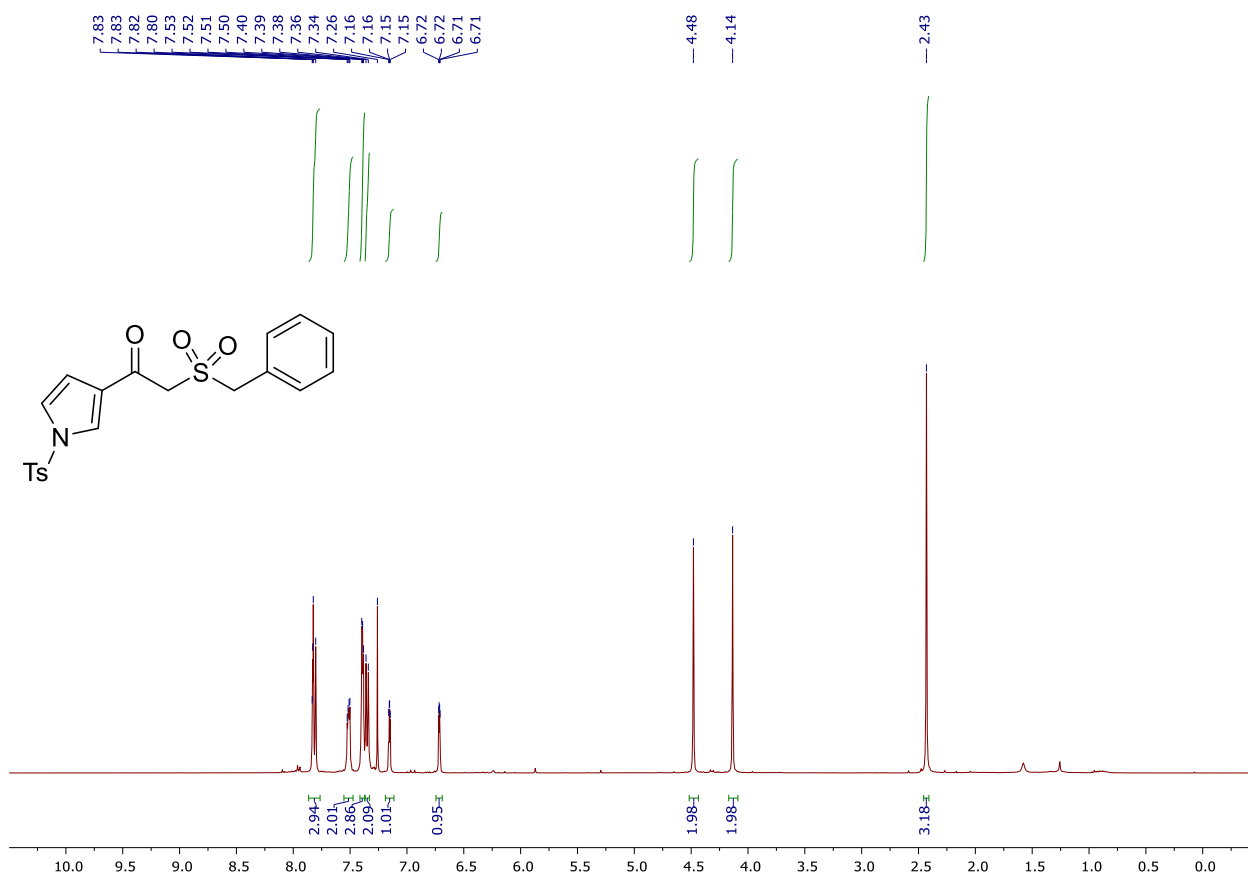

$^{13}\text{C}\{^1\text{H}\}$  NMR (100 MHz,  $\text{CDCl}_3$ ) of **2y**

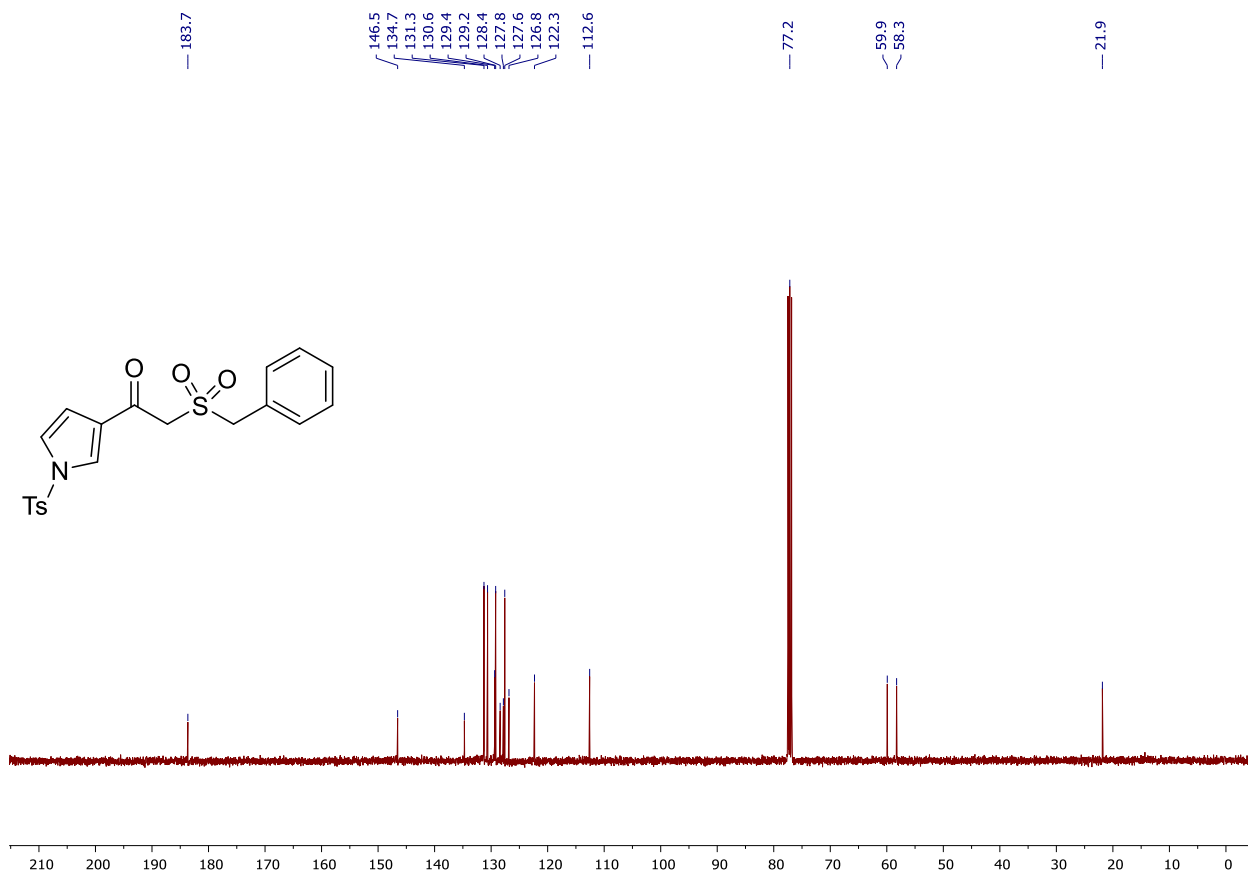



$^1\text{H}$  NMR (400 MHz,  $\text{CDCl}_3$ ) of **2z**

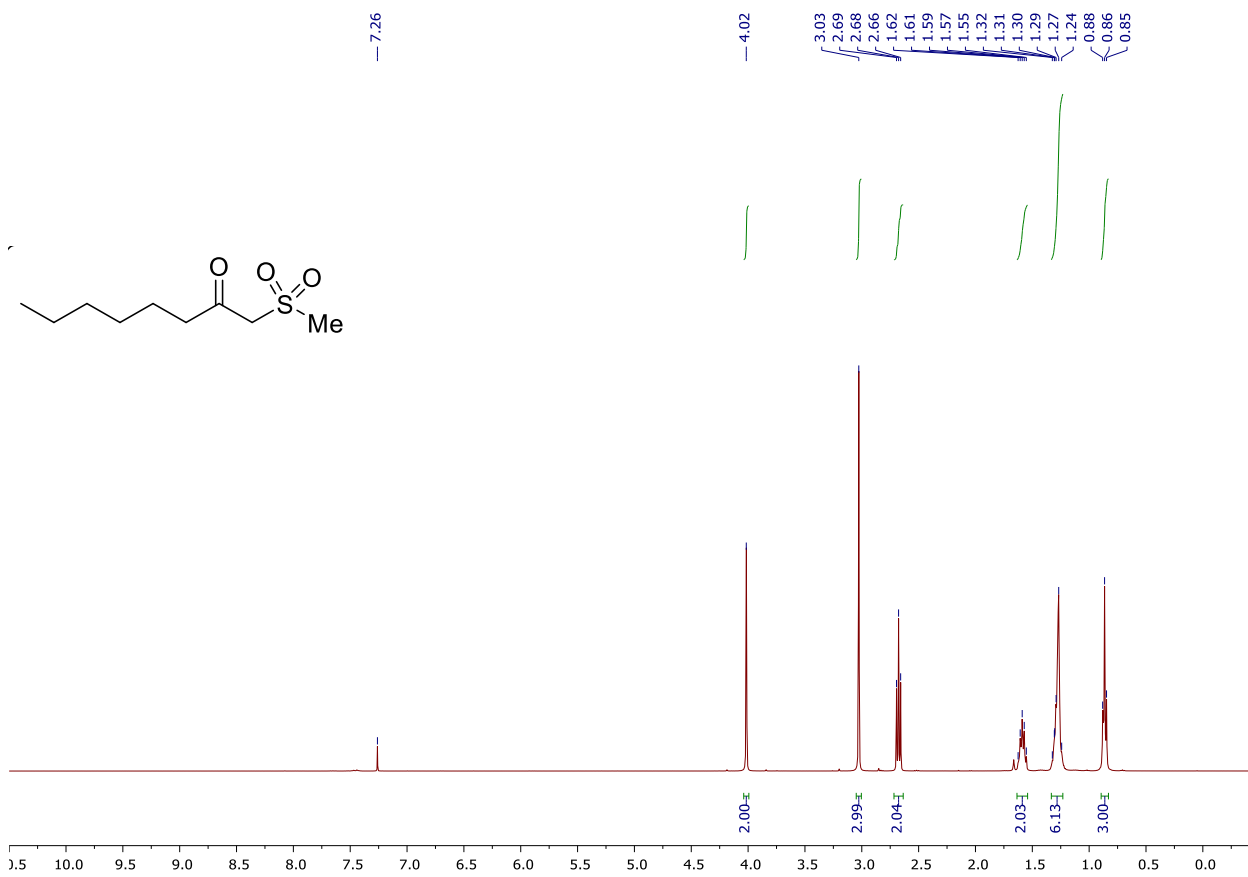

$^{13}\text{C}\{^1\text{H}\}$  NMR (100 MHz,  $\text{CDCl}_3$ ) of **2z**

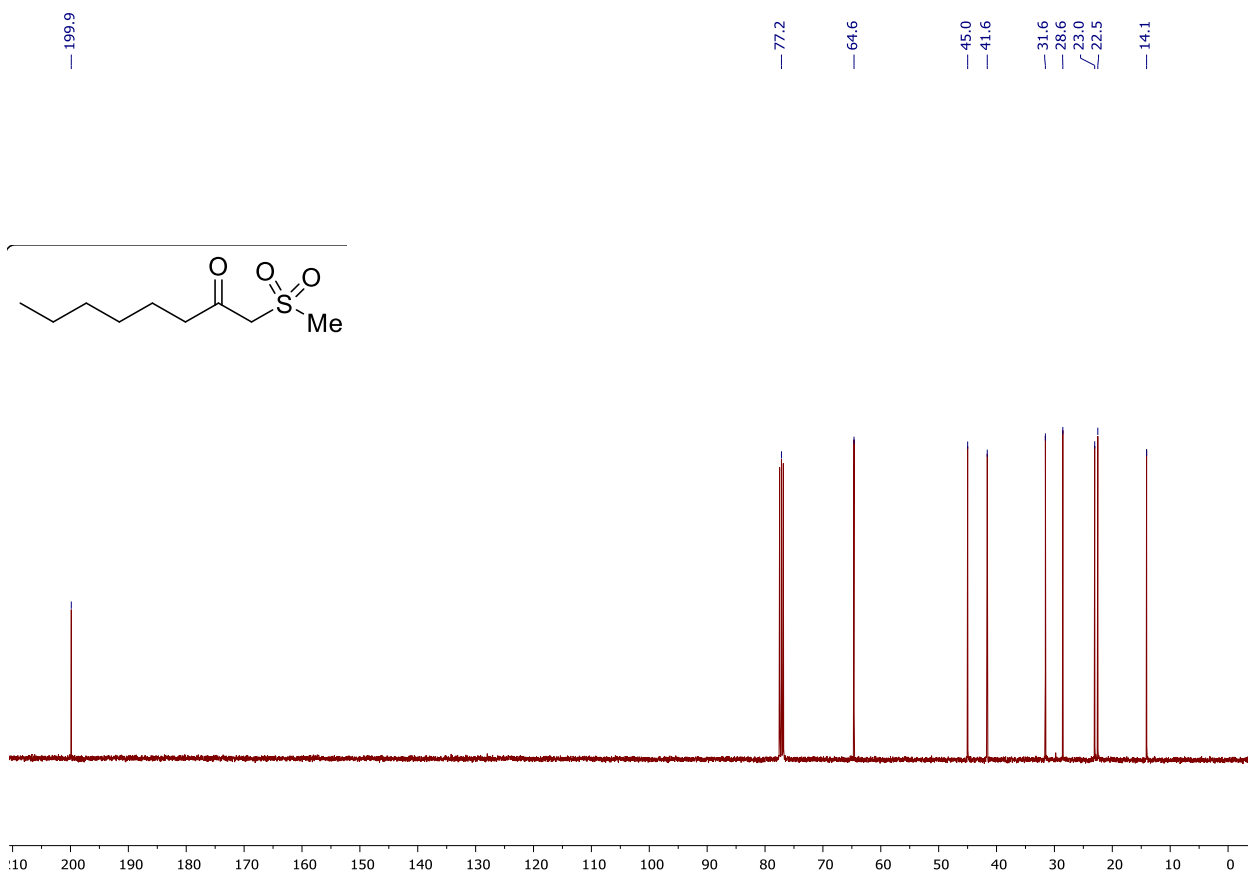

$^1\text{H}$  NMR (400 MHz,  $\text{DMSO-}d_6$ ) of **2aa**

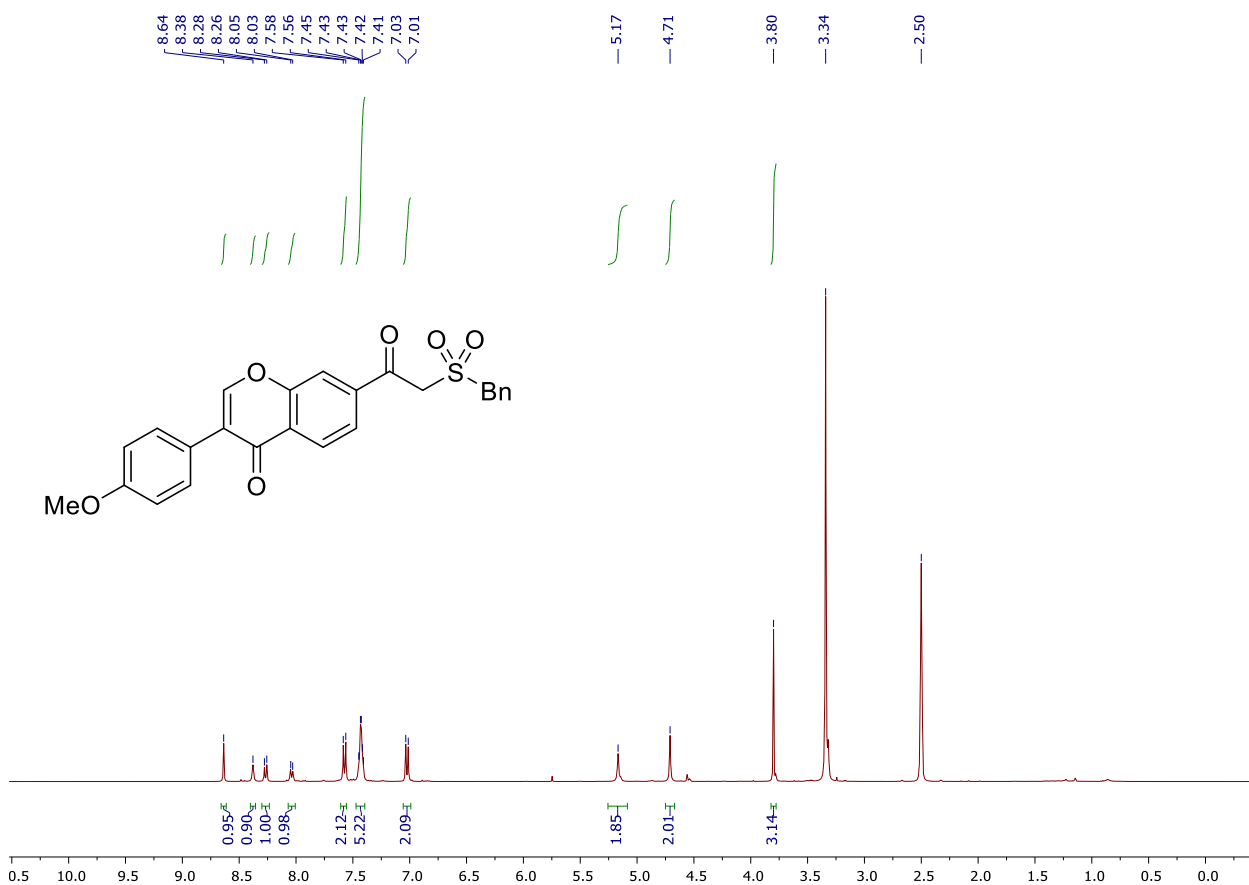

$^{13}\text{C}\{^1\text{H}\}$  NMR (100 MHz,  $\text{DMSO-}d_6$ ) of **2aa**

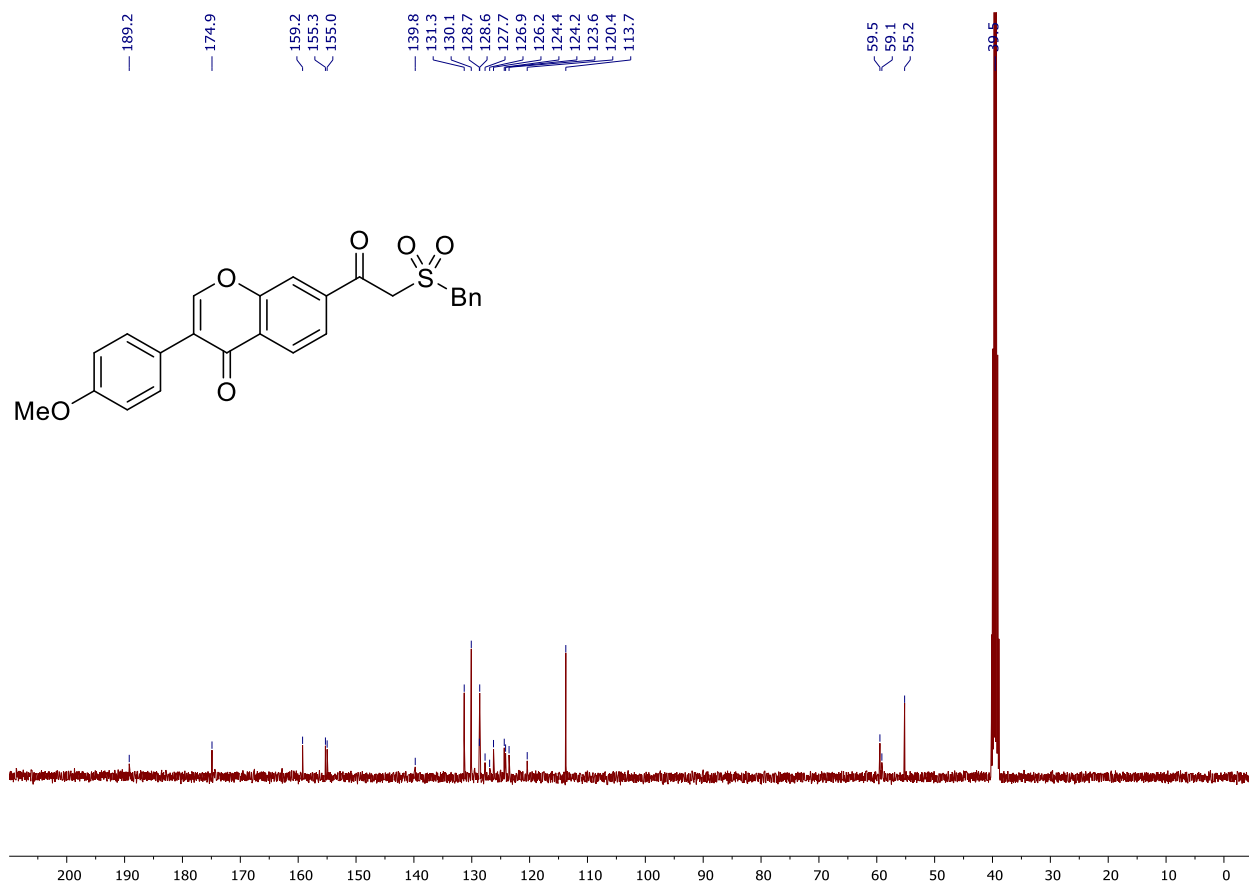

<sup>1</sup>H NMR (400 MHz, CDCl<sub>3</sub>) of **2ab**

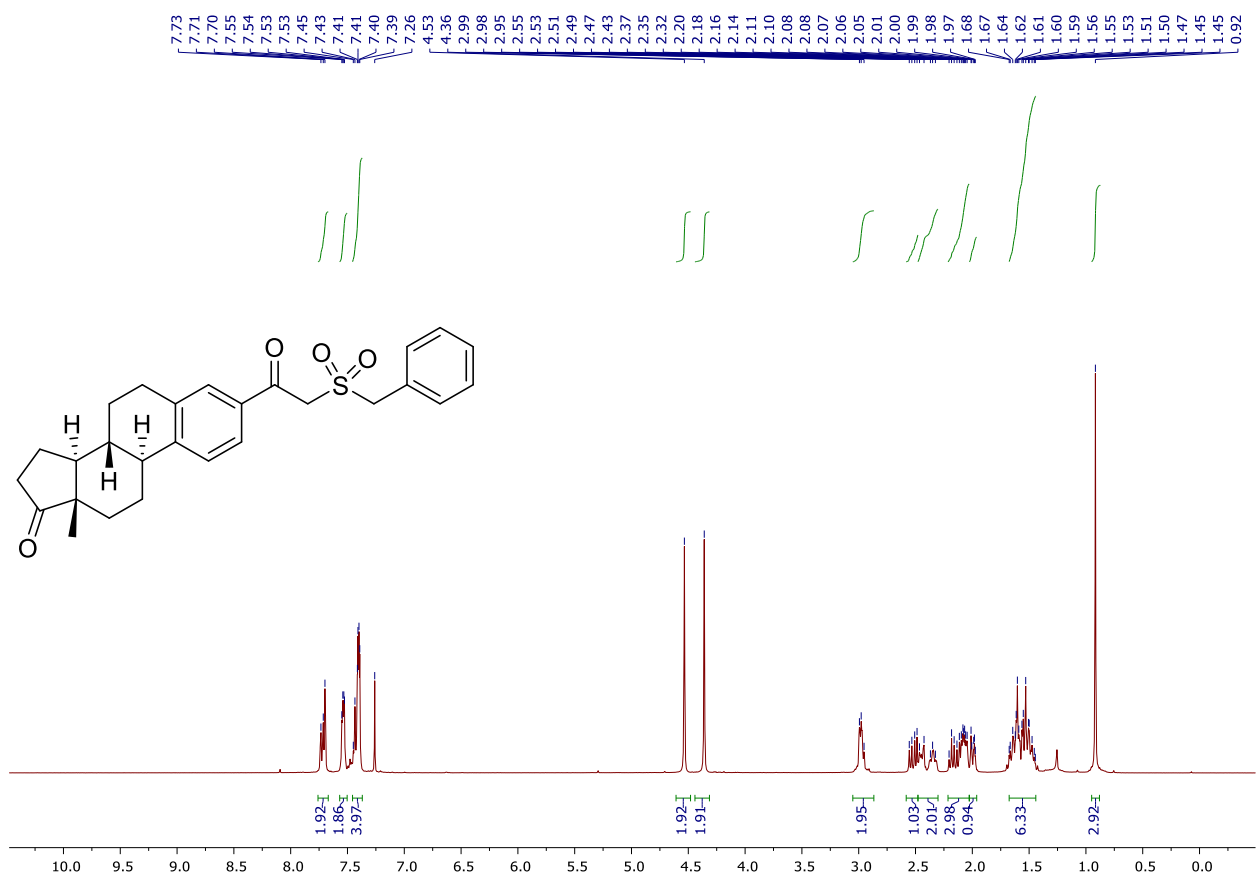

<sup>13</sup>C{<sup>1</sup>H} NMR (100 MHz, CDCl<sub>3</sub>) of **2ab**

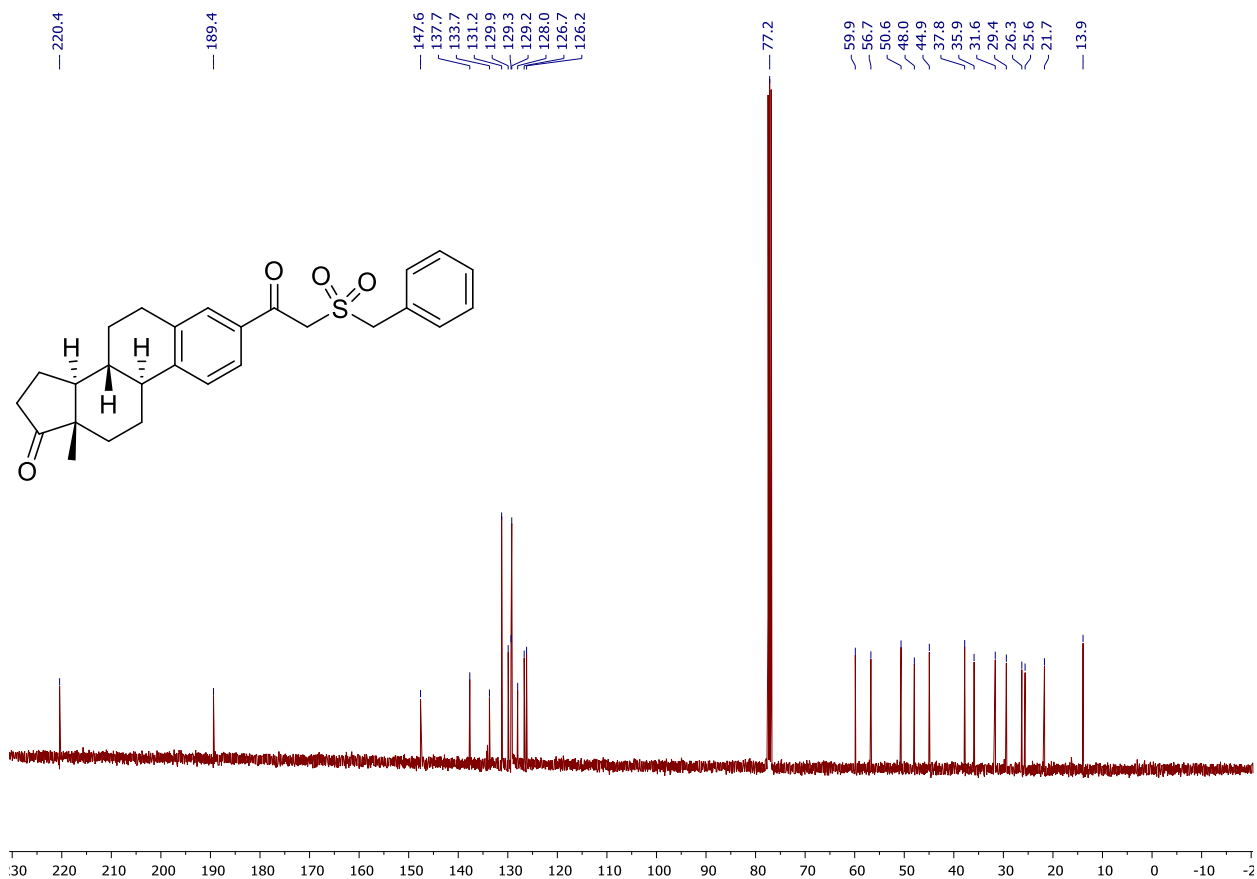

$^1\text{H}$  NMR (400 MHz,  $\text{CDCl}_3$ ) of **2ac**

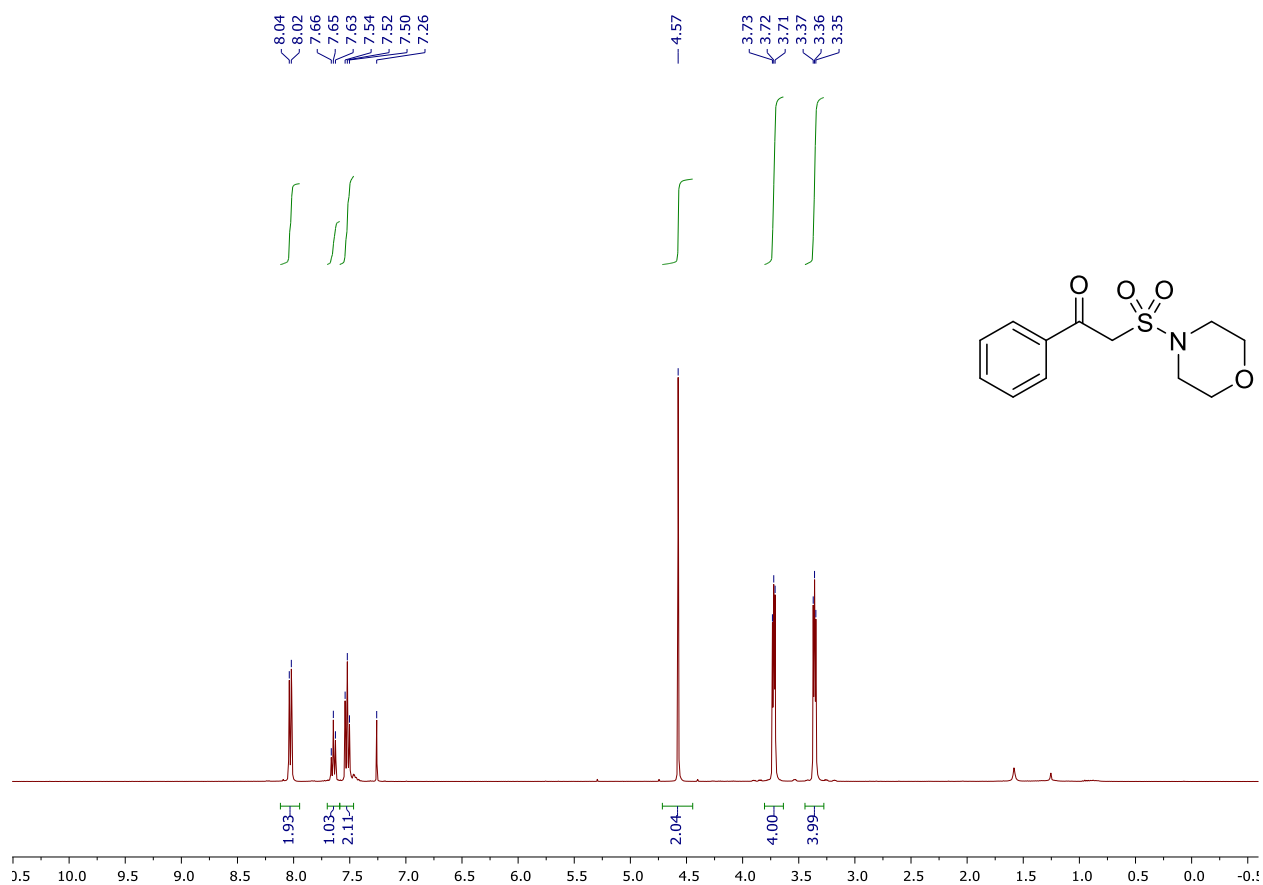

$^{13}\text{C}\{^1\text{H}\}$  NMR (100 MHz,  $\text{CDCl}_3$ ) of **2ac**

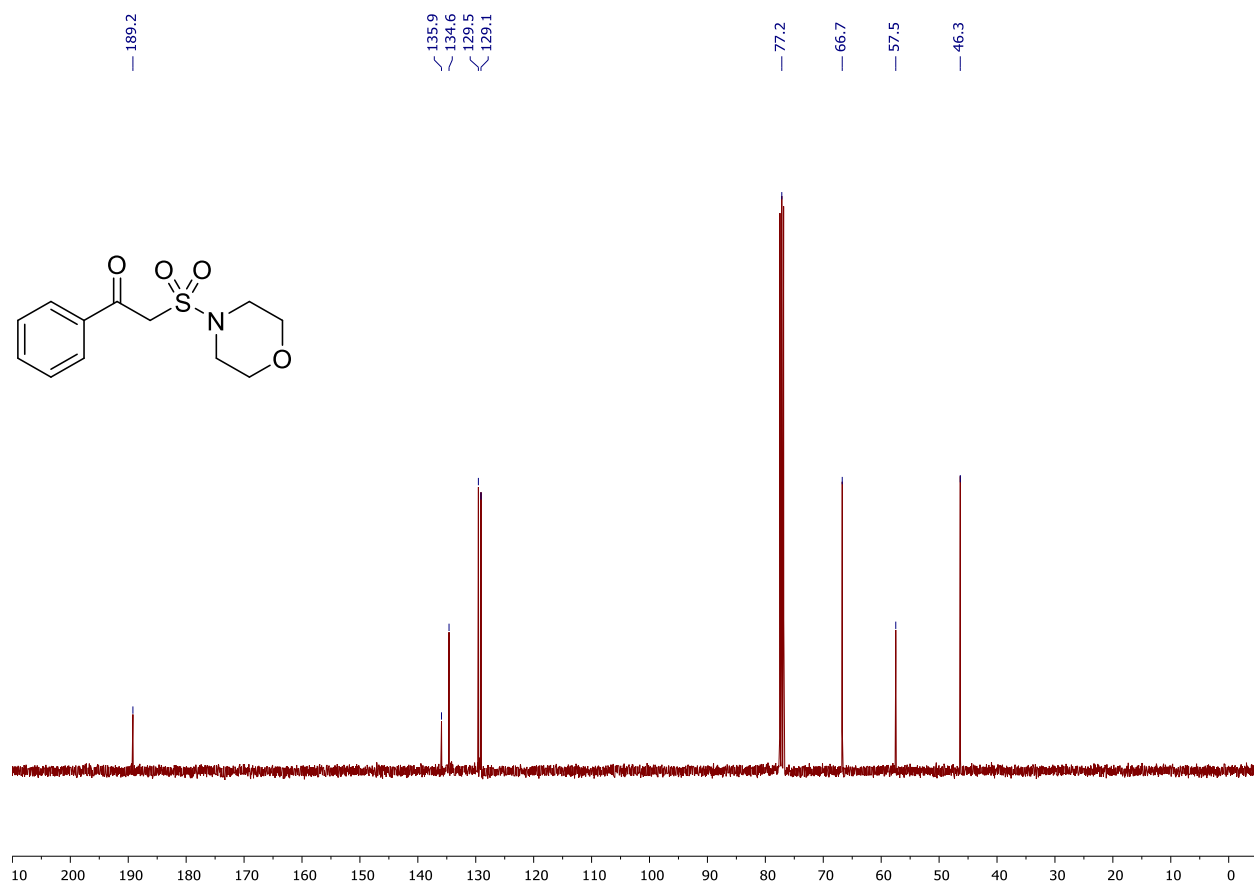

$^1\text{H}$  NMR (400 MHz,  $\text{DMSO-}d_6$ ) of **2ad**

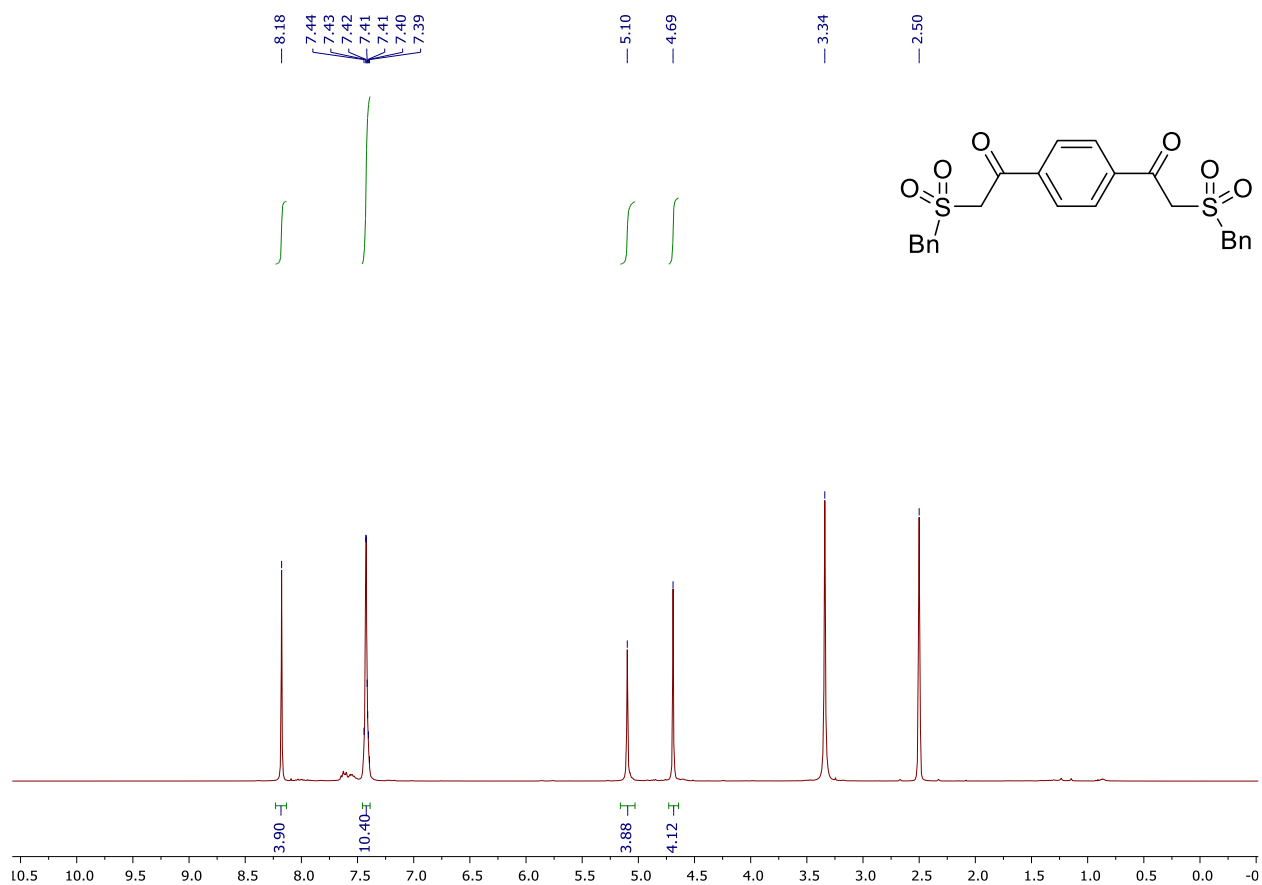

$^{13}\text{C}\{^1\text{H}\}$  NMR (100 MHz,  $\text{DMSO-}d_6$ ) of **2ad**

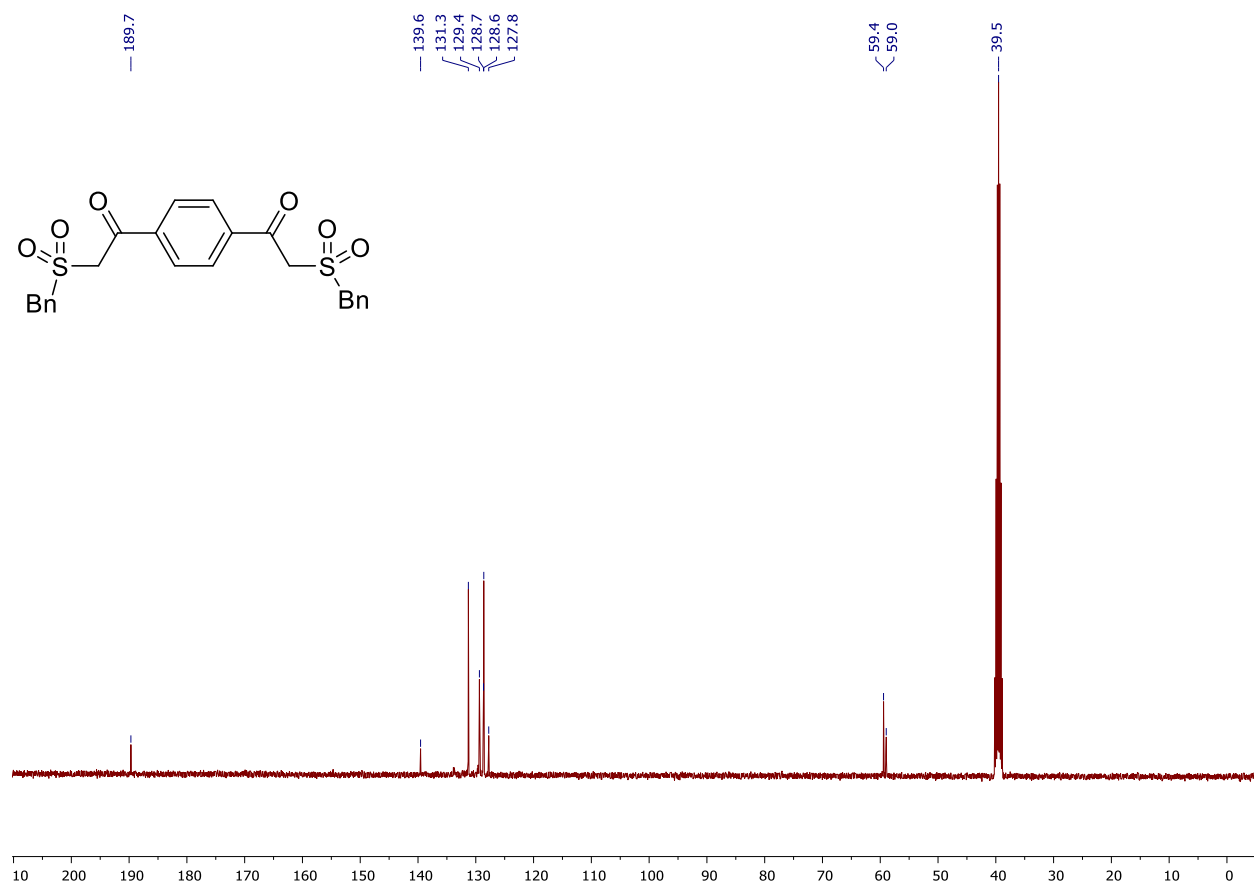

$^1\text{H}$  NMR (400 MHz,  $\text{CDCl}_3$ ) of **2ae**

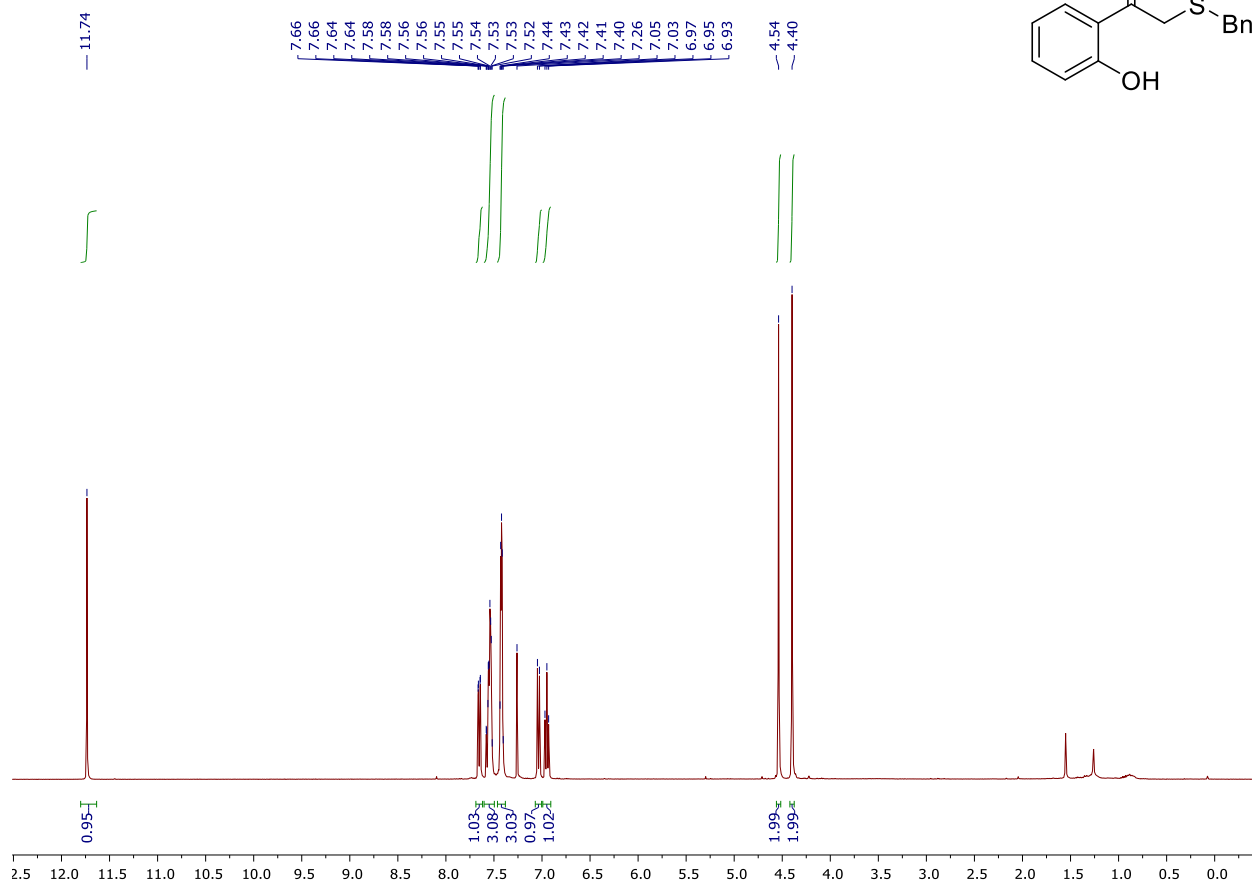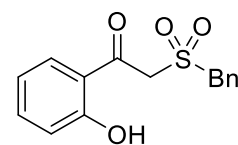

$^{13}\text{C}\{^1\text{H}\}$  NMR (100 MHz,  $\text{CDCl}_3$ ) of **2ae**

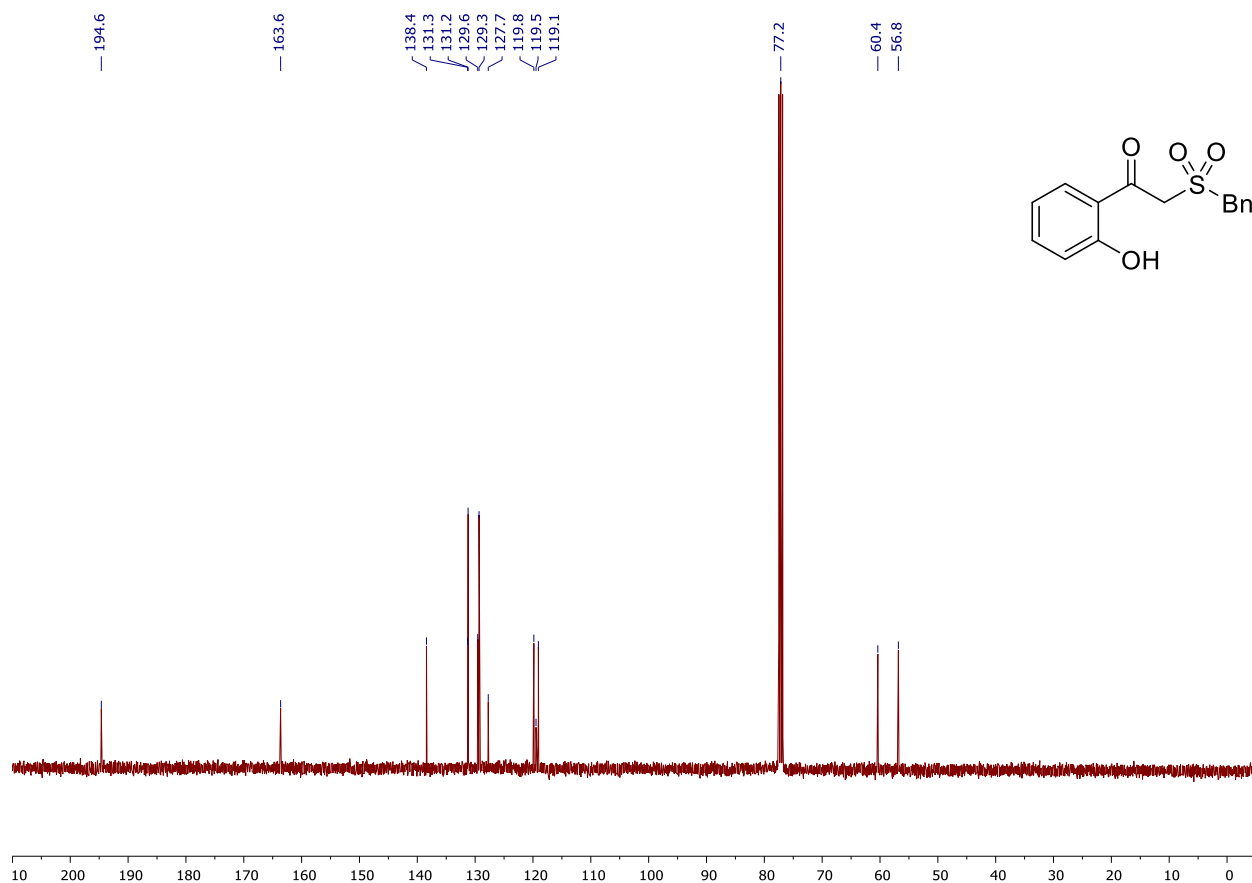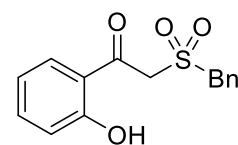

$^1\text{H}$  NMR (400 MHz,  $\text{CDCl}_3$ ) of **4**

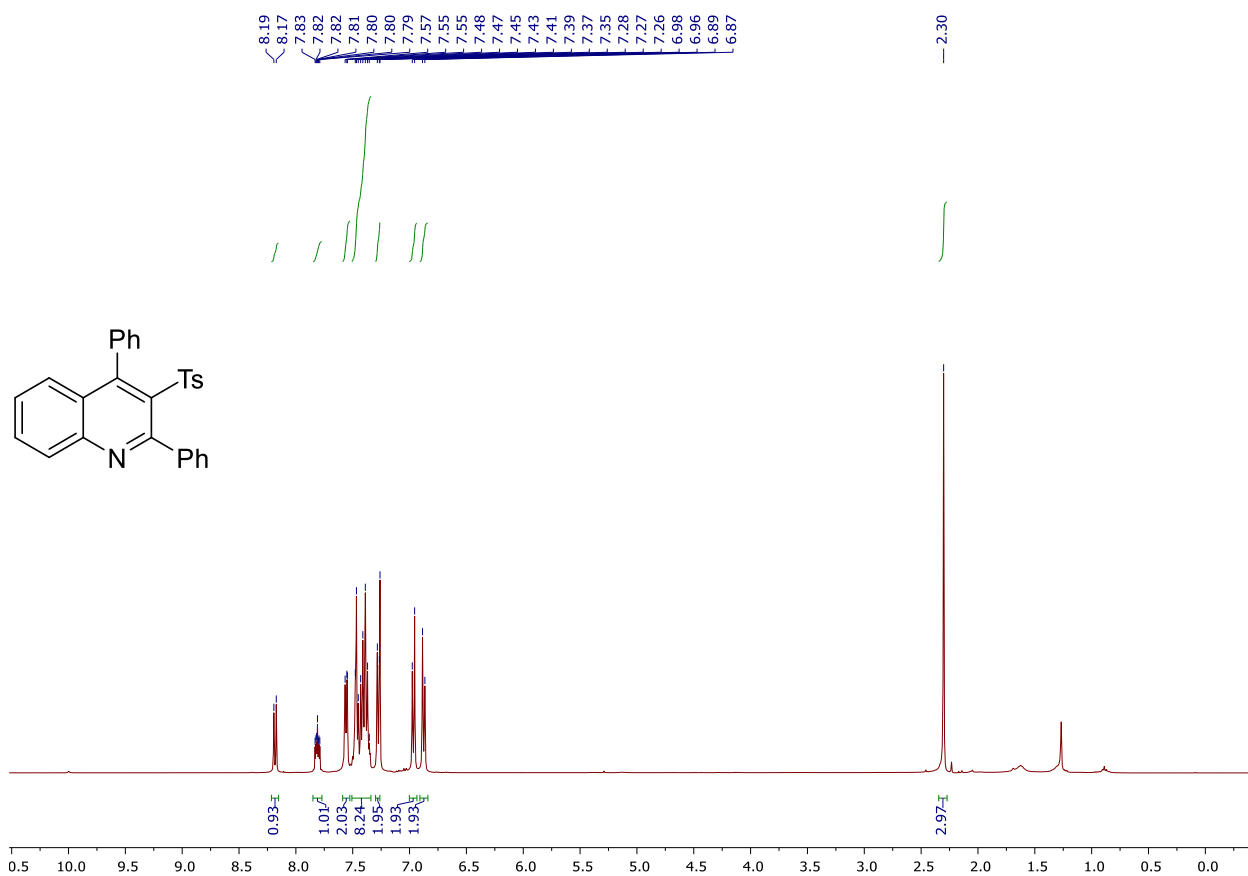

$^{13}\text{C}\{^1\text{H}\}$  NMR (100 MHz,  $\text{CDCl}_3$ ) of **4**

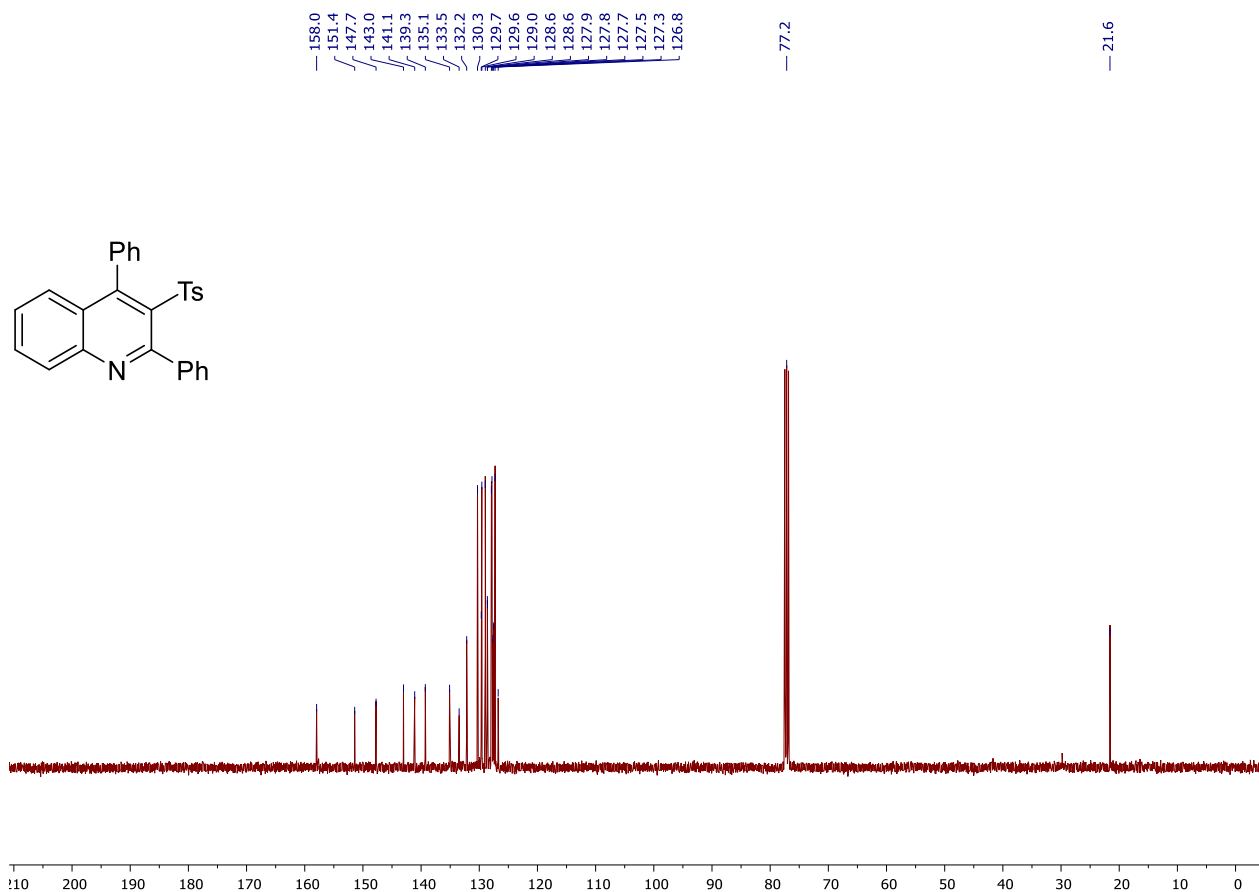

$^1\text{H}$  NMR (400 MHz,  $\text{DMSO-}d_6$ ) of **6**

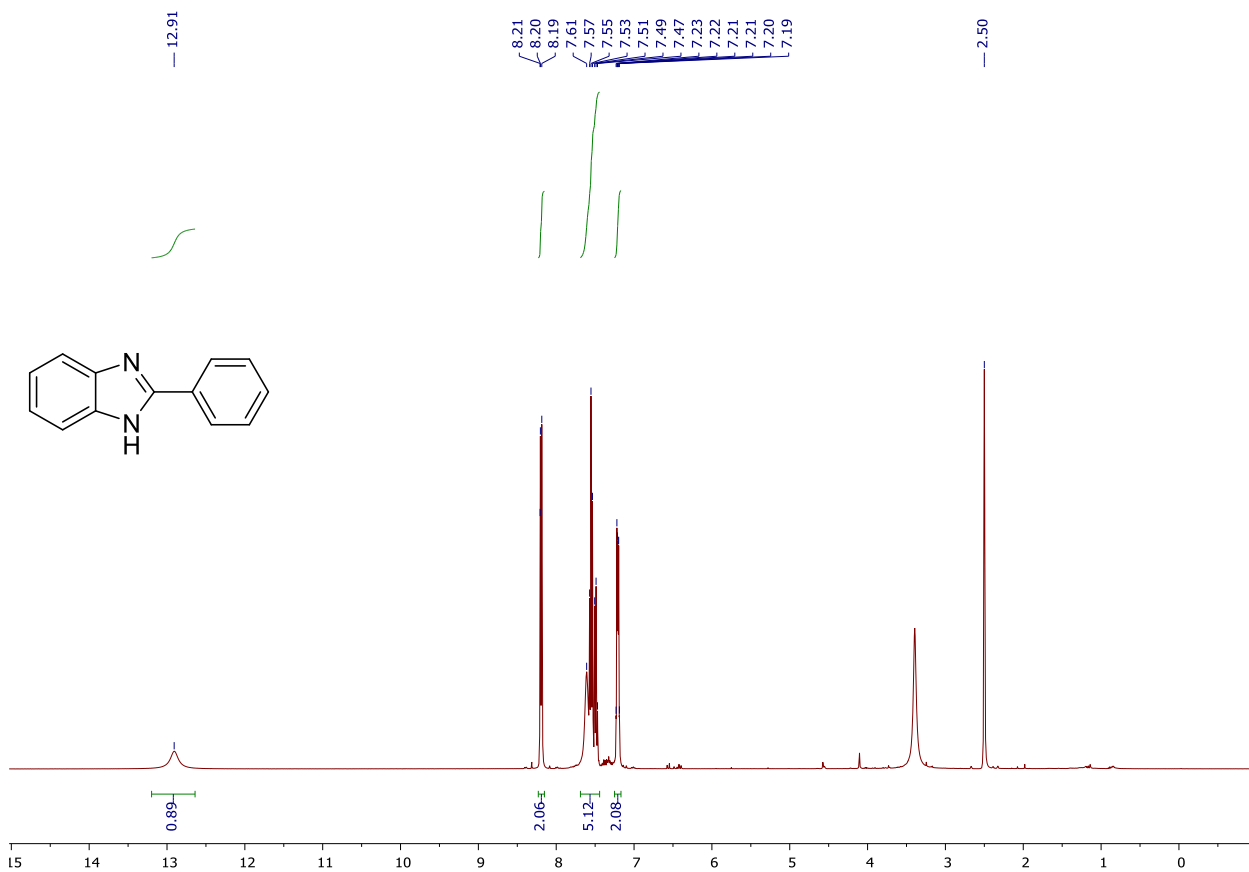

$^{13}\text{C}\{^1\text{H}\}$  NMR (100 MHz,  $\text{DMSO-}d_6$ ) of **6**

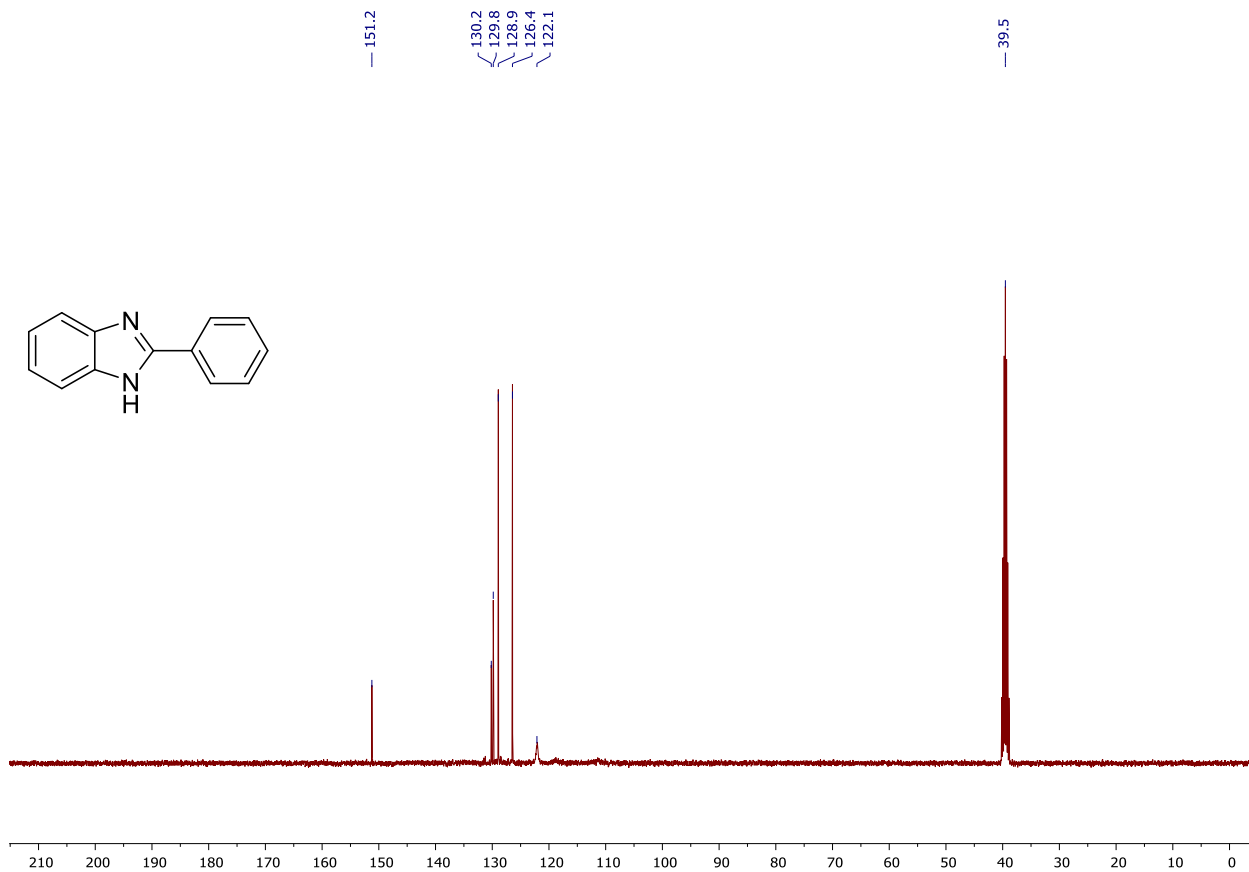



$^1\text{H}$  NMR (400 MHz,  $\text{CDCl}_3$ ) of **8**

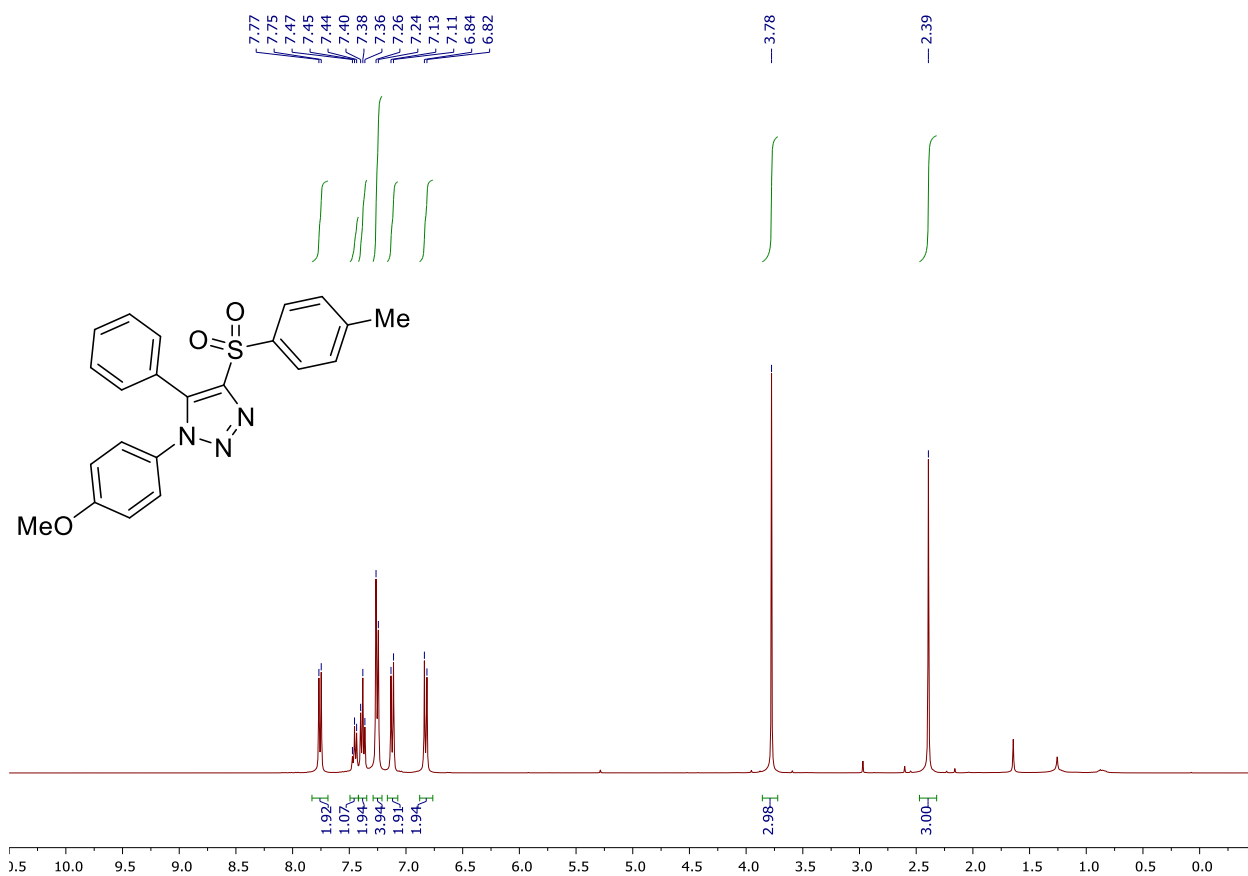

$^{13}\text{C}\{^1\text{H}\}$  NMR (100 MHz,  $\text{CDCl}_3$ ) of **8**

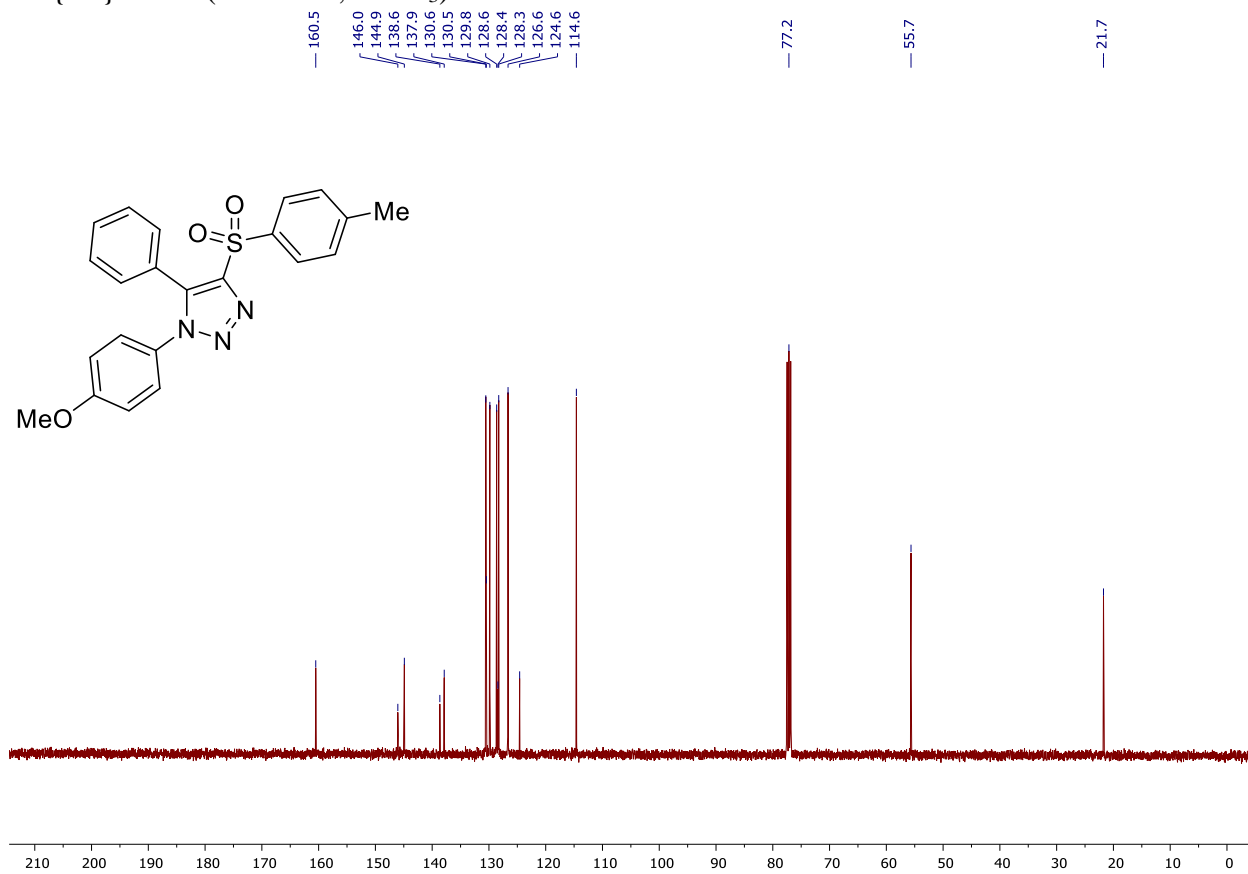

$^1\text{H}$  NMR (400 MHz,  $\text{CDCl}_3$ ) of **10**

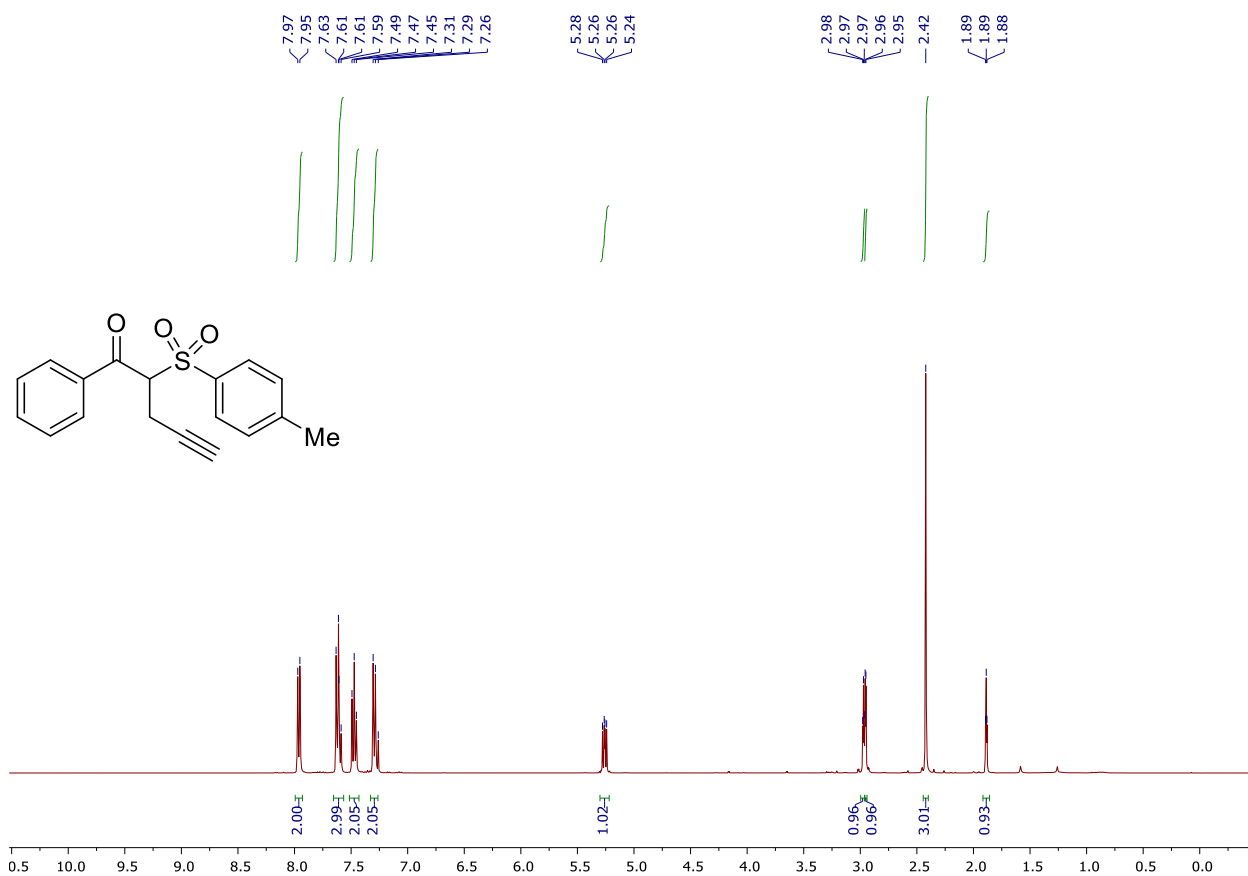

$^{13}\text{C}\{^1\text{H}\}$  NMR (100 MHz,  $\text{CDCl}_3$ ) of **10**

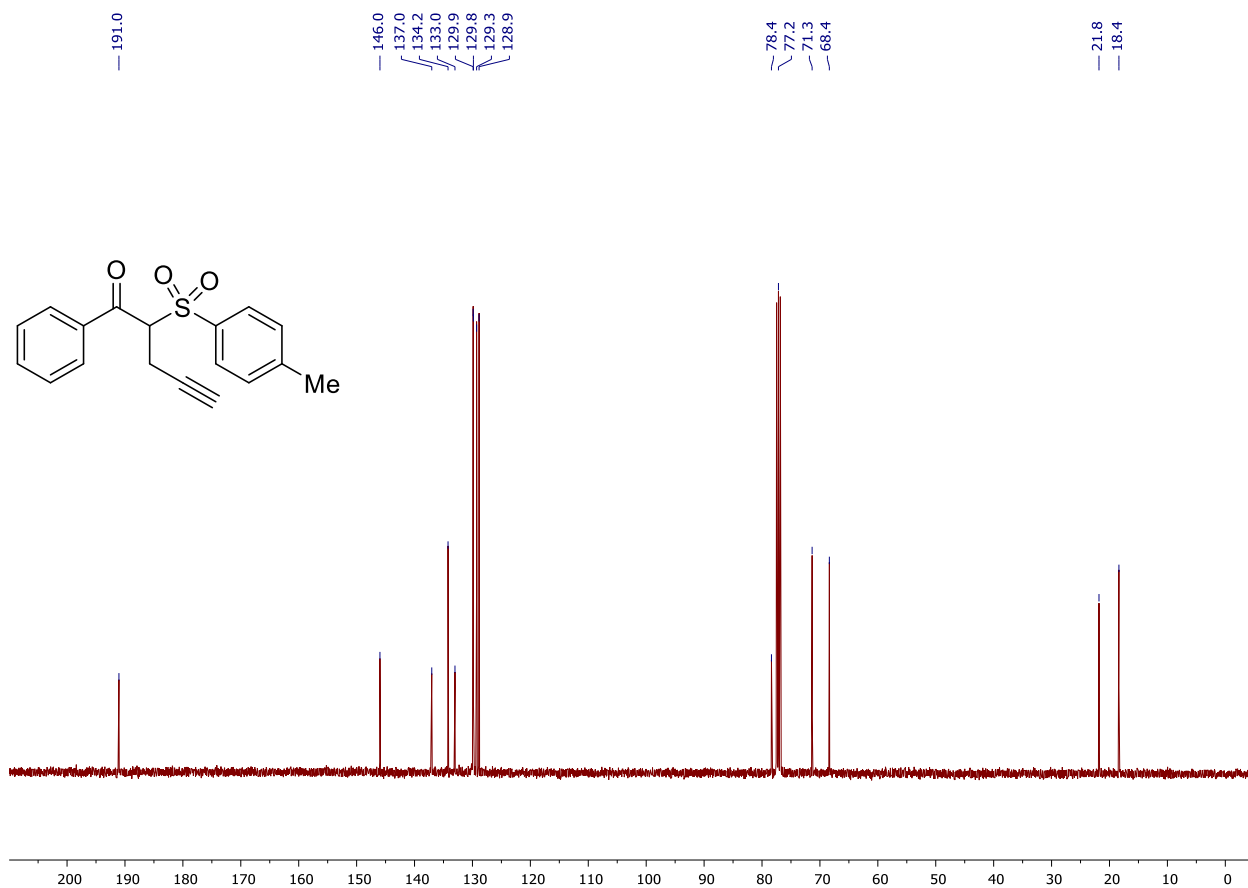

$^1\text{H}$  NMR (400 MHz,  $\text{CDCl}_3$ ) of **11**

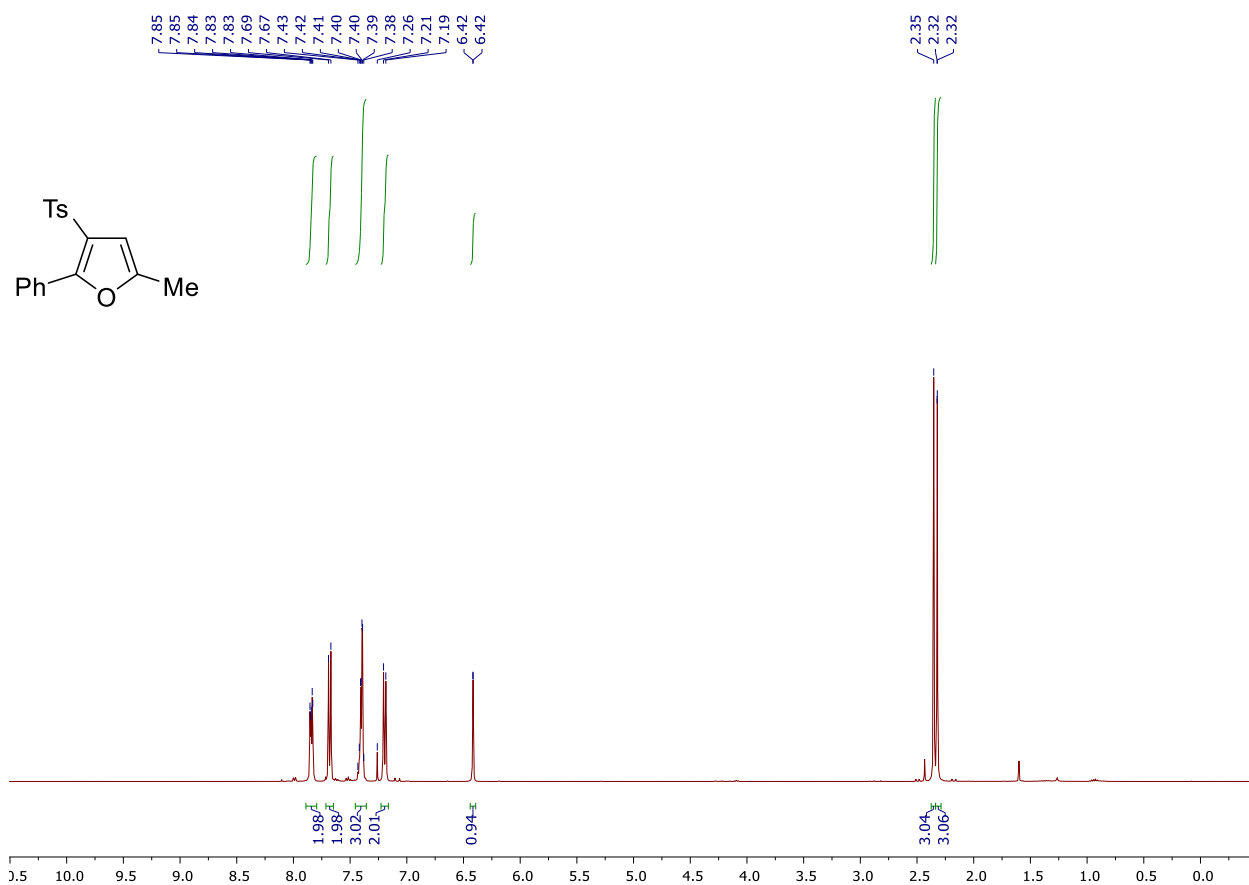

$^{13}\text{C}\{^1\text{H}\}$  NMR (100 MHz,  $\text{CDCl}_3$ ) of **11**

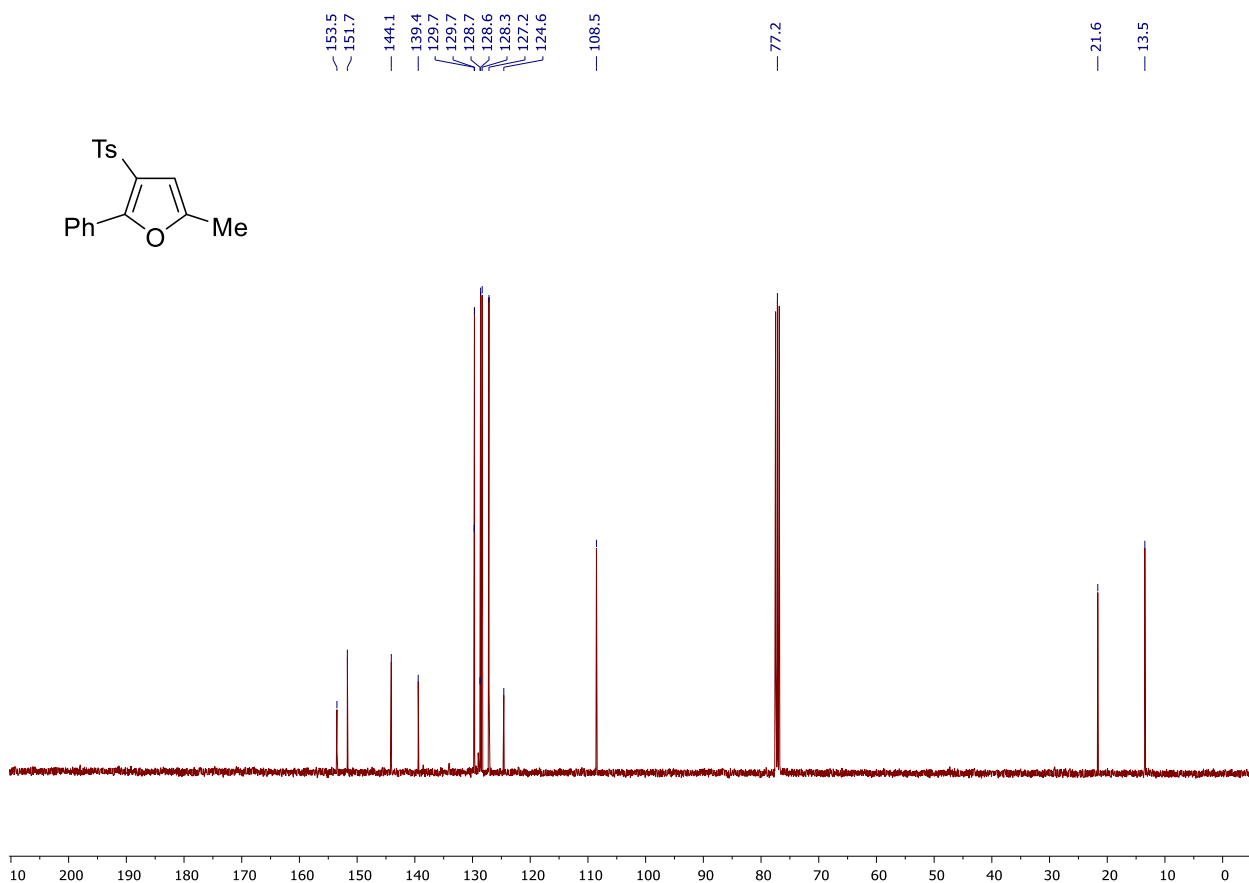

$^1\text{H}$  NMR (400 MHz,  $\text{CDCl}_3$ ) of **12**

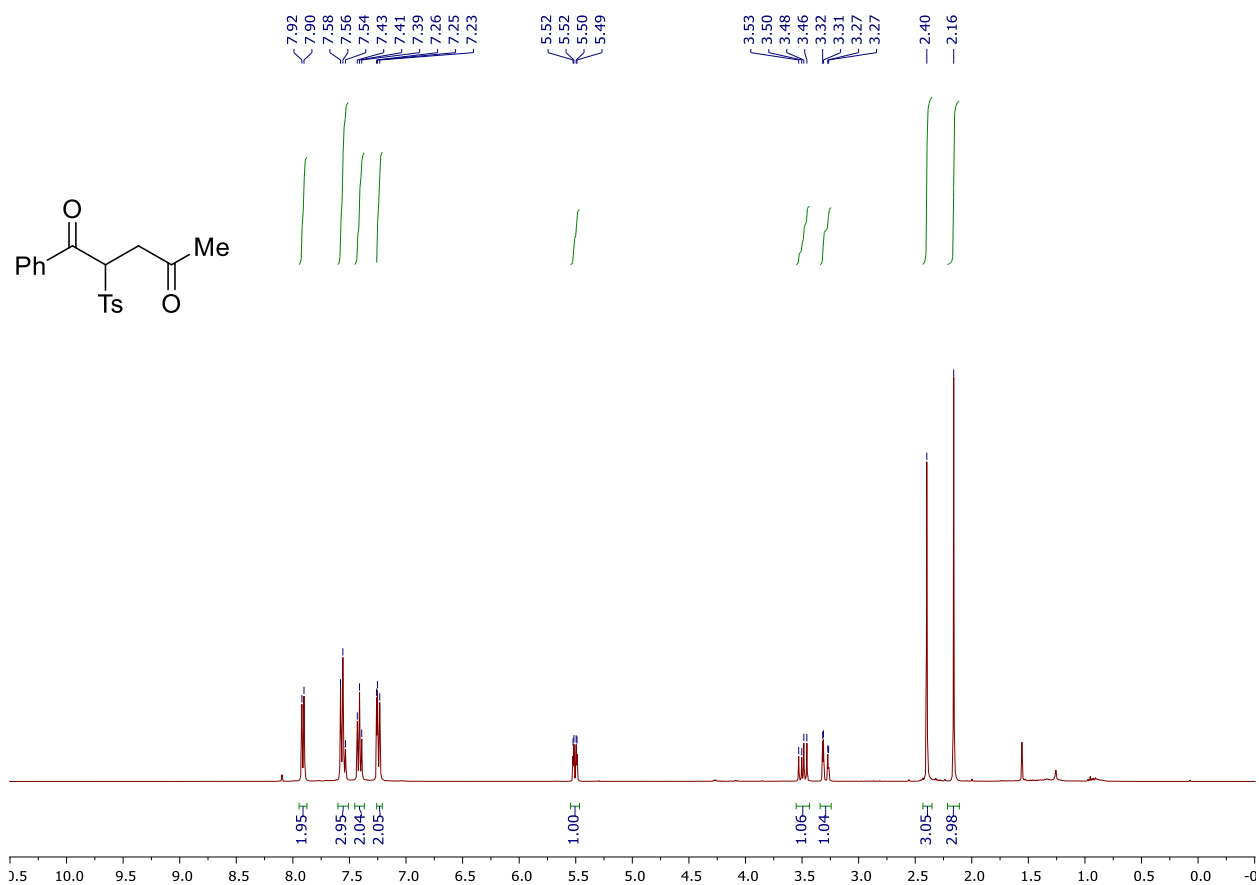

$^{13}\text{C}\{^1\text{H}\}$  NMR (100 MHz,  $\text{CDCl}_3$ ) of **12**

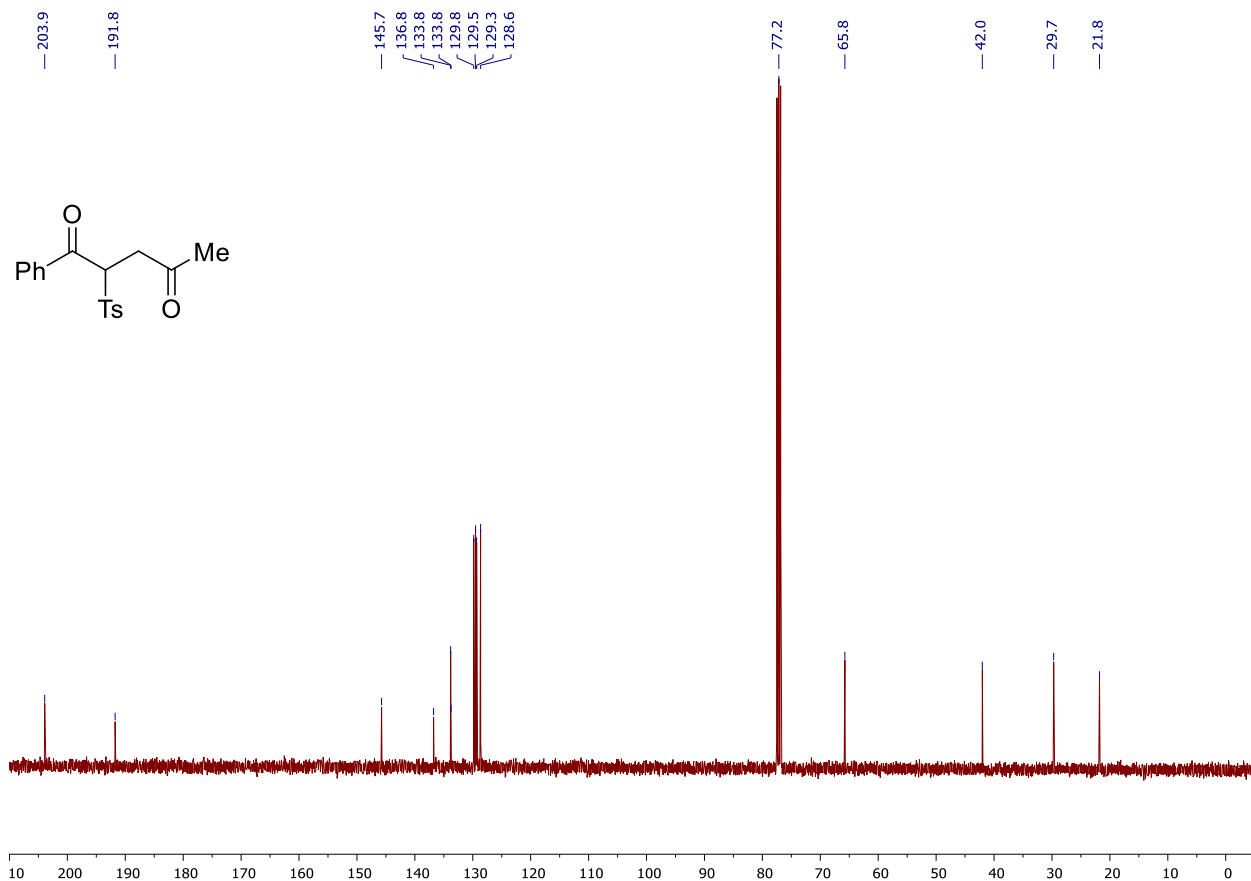

## 7 XRD Single Crystal Structures of 2q

The crystal was prepared by slow evaporation of solutions of **2q** in acetonitrile at room temperature. For single crystal X-ray diffraction experiment the crystals were fixed on a micro mount and placed on a SuperNova, Single source at offset/far, HyPix3000 diffractometer using Cu K $\alpha$  monochromated radiation. The crystals were kept at 100(2) K during data collection. The structures have been solved by ShelXT [G. M. Sheldrick, *Acta Crystallogr. Sect. A* 2015, 71, 3-8] structure solution programs using Intrinsic Phasing, respectively, and refined by means of the SHELXL program [G. M. Sheldrick, *Acta Crystallogr. Sect. C* 2015, 71, 3-8] incorporated in the OLEX2 program package [O. V. Dolomanov, L. J. Bourhis, R. J. Gildea, J. A. K. Howard, H. Puschmann, *J. Appl. Cryst.*, 2009, 42, 339-341].

### Crystal data and structure refinement

Bond precision: C-C = 0.0018 Å Wavelength=1.54184  
Cell: a=6.5529(1) b=7.7286(1) c=27.9324(2)  
alpha=90 beta=93.449(1) gamma=90  
Temperature: 100 K

|                | Calculated     | Reported       |
|----------------|----------------|----------------|
| Volume         | 1412.07(3)     | 1412.07(3)     |
| Space group    | P 21/n         | P 1 21/n 1     |
| Hall group     | -P 2yn         | -P 2yn         |
| Moiety formula | C15 H13 N O5 S | C15 H13 N O5 S |
| Sum formula    | C15 H13 N O5 S | C15 H13 N O5 S |
| Mr             | 319.32         | 319.32         |
| Dx,g cm-3      | 1.502          | 1.502          |
| Z              | 4              | 4              |
| Mu (mm-1)      | 2.272          | 2.272          |
| F000           | 664.0          | 664.0          |
| F000'          | 667.45         |                |
| h,k,lmax       | 8,9,35         | 8,9,35         |
| Nref           | 3076           | 3009           |
| Tmin,Tmax      | 0.643,0.893    | 0.794,1.000    |
| Tmin'          | 0.578          |                |

Correction method= # Reported T Limits: Tmin=0.794 Tmax=1.000

AbsCorr = MULTI-SCAN

Data completeness= 0.978

Theta(max)= 79.832

R(reflections)= 0.0319( 2881)

wR2(reflections)= 0.0878( 3009)

S = 1.088

Npar= 199

Molecular structure of **2q** (50% probability amplitude displacement ellipsoids).

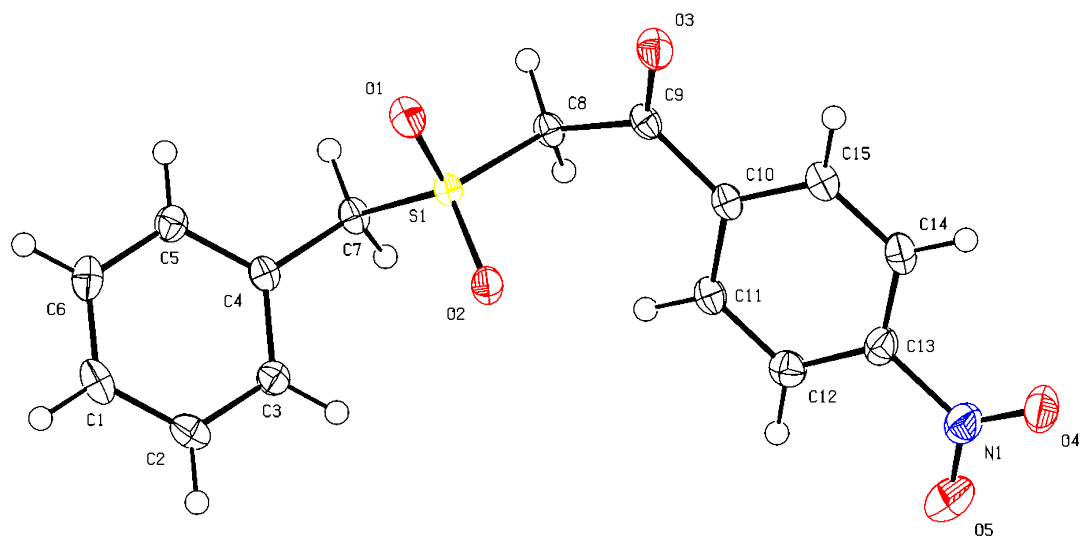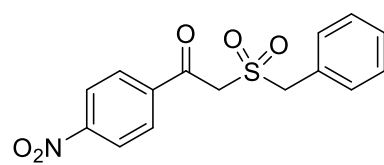

## 8 Calculations of Atom-economy

Calculations of atom-economy are given for equivalent quantities of reagents that are needed for a full material balance. Also, it is assumed that all chemical reactions proceed quantitatively, auxiliary reagents and additives are not taken into account.

Our method 1:

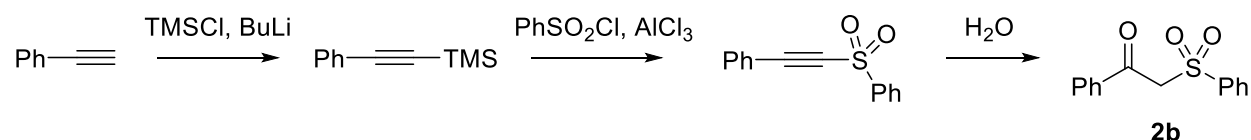

$$\text{Atom economy} = \frac{M(2b)}{M(\text{PhC}\equiv\text{CH}) + M(\text{TMSCl}) + M(\text{BuLi}) + M(\text{PhSO}_2\text{Cl}) + M(\text{AlCl}_3) + M(\text{H}_2\text{O})} \times 100\% = 43\%$$

Our method 2:

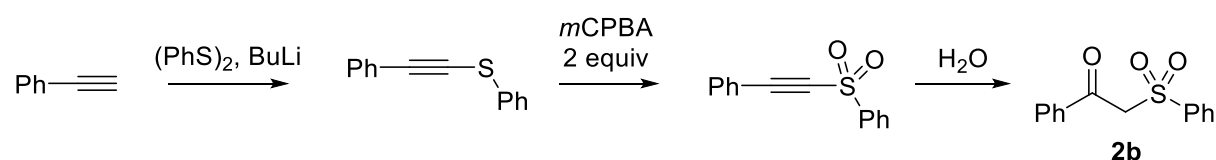

$$\text{Atom economy} = \frac{M(2b)}{M(\text{PhC}\equiv\text{CH}) + M(\text{PhSSPh}) + M(\text{BuLi}) + 2M(\text{mCPBA}) + M(\text{H}_2\text{O})} \times 100\% = 35\%$$

Yavari's method [I. Yavari and S. Shaabanzadeh, Electrochemical Synthesis of  $\beta$ -Ketosulfones from Switchable Starting Materials, *Org. Lett.*, 2020, **22**, 464–467]:

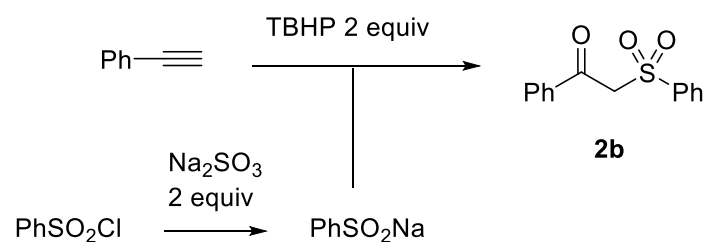

$$\text{Atom economy} = \frac{M(2b)}{M(\text{PhC}\equiv\text{CH}) + M(\text{PhSO}_2\text{Cl}) + 2M(\text{Na}_2\text{SO}_3) + 2M(\text{TBHP})} \times 100\% = 37\%$$
